# Supplementary material for: Host Response of Syrian Hamster to SARS-CoV-2 Infection including Differences with Humans and between Sexes
Source: Viruses. 2023 Feb 3;15(2):428. doi: 10.3390/v15020428 (PMC9960357; doi:10.3390/v15020428)
Supplement: Supplementary file 1 [file viruses-15-00428-s001.zip]

Archive with 6 entries (6 files):
- Table S1.xlsx
- Table S2.xlsx
- Table S3.xlsx
- Table S4.xlsx
- Table S5.xlsx
- _viruses-2104441_supplementary materials_rev_trackchanges.pdf
