# Supplementary material for: Host Response of Syrian Hamster to SARS-CoV-2 Infection including Differences with Humans and between Sexes
Source: Viruses. 2023 Feb 3;15(2):428. doi: 10.3390/v15020428 (PMC9960357; doi:10.3390/v15020428)
Supplement: Supplementary file 1 [file viruses-15-00428-s001.zip › Table S3.xlsx]

## Sheet: #DEGs
Sample	# Up	# Down
lung F 2dpi	354	23
lung F 6dpi	1118	641
lung F 14dpi	242	69
lung M 2dpi	413	307
lung M 6dpi	2055	1764
lung M 14dpi	130	101
intestine F 2dpi	149	150
intestine F 6dpi	70	86
intestine F 14dpi	763	373
intestine M 2dpi	626	294
intestine M 6dpi	94	219
intestine M 14dpi	360	158
brain F 2dpi	108	10
brain F 6dpi	15	9
brain F 14dpi	54	230
brain M 2dpi	79	6
brain M 6dpi	7	9
brain M 14dpi	16	10

## Sheet: DEGs
Gene	lung__F__2dpi__infected__VS__lung__F__2dpi__mock_log2FC	lung__F__2dpi__infected__VS__lung__F__2dpi__mock_FDR	lung__F__6dpi__infected__VS__lung__F__6dpi__mock_log2FC	lung__F__6dpi__infected__VS__lung__F__6dpi__mock_FDR	lung__F__14dpi__infected__VS__lung__F__14dpi__mock_log2FC	lung__F__14dpi__infected__VS__lung__F__14dpi__mock_FDR	lung__M__2dpi__infected__VS__lung__M__2dpi__mock_log2FC	lung__M__2dpi__infected__VS__lung__M__2dpi__mock_FDR	lung__M__6dpi__infected__VS__lung__M__6dpi__mock_log2FC	lung__M__6dpi__infected__VS__lung__M__6dpi__mock_FDR	lung__M__14dpi__infected__VS__lung__M__14dpi__mock_log2FC	lung__M__14dpi__infected__VS__lung__M__14dpi__mock_FDR	intestine__F__2dpi__infected__VS__intestine__F__2dpi__mock_log2FC	intestine__F__2dpi__infected__VS__intestine__F__2dpi__mock_FDR	intestine__F__6dpi__infected__VS__intestine__F__6dpi__mock_log2FC	intestine__F__6dpi__infected__VS__intestine__F__6dpi__mock_FDR	intestine__F__14dpi__infected__VS__intestine__F__14dpi__mock_log2FC	intestine__F__14dpi__infected__VS__intestine__F__14dpi__mock_FDR	intestine__M__2dpi__infected__VS__intestine__M__2dpi__mock_log2FC	intestine__M__2dpi__infected__VS__intestine__M__2dpi__mock_FDR	intestine__M__6dpi__infected__VS__intestine__M__6dpi__mock_log2FC	intestine__M__6dpi__infected__VS__intestine__M__6dpi__mock_FDR	intestine__M__14dpi__infected__VS__intestine__M__14dpi__mock_log2FC	intestine__M__14dpi__infected__VS__intestine__M__14dpi__mock_FDR	brain__F__2dpi__infected__VS__brain__F__2dpi__mock_log2FC	brain__F__2dpi__infected__VS__brain__F__2dpi__mock_FDR	brain__F__6dpi__infected__VS__brain__F__6dpi__mock_log2FC	brain__F__6dpi__infected__VS__brain__F__6dpi__mock_FDR	brain__F__14dpi__infected__VS__brain__F__14dpi__mock_log2FC	brain__F__14dpi__infected__VS__brain__F__14dpi__mock_FDR	brain__M__2dpi__infected__VS__brain__M__2dpi__mock_log2FC	brain__M__2dpi__infected__VS__brain__M__2dpi__mock_FDR	brain__M__6dpi__infected__VS__brain__M__6dpi__mock_log2FC	brain__M__6dpi__infected__VS__brain__M__6dpi__mock_FDR	brain__M__14dpi__infected__VS__brain__M__14dpi__mock_log2FC	brain__M__14dpi__infected__VS__brain__M__14dpi__mock_FDR
A1bg	-0.546745	NA	-0.870063	NA	0.785277	NA	1.87482	NA	-1.40952	NA	3.27131	NA	-0.00839075	NA	0.251163	NA	-0.503758	NA	-1.77738	NA	-0.102793	NA	-0.053372	NA	0.937185	NA	-0.230987	0.999778	2.6208	NA	-1.00987	0.999992	-3.13862	NA	3.82582	0.999959
A1cf	-0.356651	0.971741	-0.564008	0.90176	-0.246097	0.960682	-0.127338	0.99019	0.309329	0.93298	-0.422847	0.930745	0.680359	0.408757	0.125667	0.989467	-0.069209	0.931537	0.413325	0.553207	-0.00822486	0.995724	-1.04929	0.186292	-0.0246063	0.999983	-0.164044	0.999778	0.0587081	0.996583	-0.0480762	0.999992	-0.174343	0.999994	-0.289998	0.999959
A2m	0.397677	0.839117	-0.219164	0.836158	0.516951	0.603705	-0.591385	0.501294	-0.847856	0.122483	-0.666534	0.426494	-0.970186	0.835364	3.69276	0.254873	2.71323	0.155108	0.684969	0.709053	4.34362	0.0386991	-4.37206	0.0308479	0.0500383	0.999983	0.19934	0.999778	-0.268793	0.831265	0.329282	0.999992	-0.083625	0.999994	-0.0855738	0.999959
A2ml1	0.635271	0.593469	0.431246	0.568331	-0.429415	0.618481	0.517785	0.537595	0.338513	0.576043	-0.234651	0.816117	3.28788	0.0673002	2.11607	0.312582	-1.97069	0.399213	-1.38348	0.335417	0.839297	0.64776	-1.53011	0.752108	0.179489	0.999983	0.177332	0.999778	-0.350567	0.823995	0.208845	0.999992	0.199322	0.999994	-0.703013	0.999959
A3galt2	0.299867	0.949219	2.28032	0.00180492	0.961142	0.508733	0.540303	0.84275	2.45826	0.000128661	1.00497	0.367693	0.103335	0.947802	-0.308904	0.949363	-1.07328	0.0535899	0.328601	0.611818	0.41124	0.753236	0.487479	0.668126	1.83452	0.999983	1.2788	0.999778	-0.536864	0.928301	0.362854	0.999992	1.41676	0.999994	0.588107	0.999959
A4galt	-0.0358314	0.971741	0.138412	0.736745	0.265403	0.475176	0.148313	0.779223	0.267155	0.310522	0.58838	0.0991312	0.43455	0.267025	0.220383	0.873343	0.223156	0.519517	-0.00403897	0.991342	-0.424873	0.340387	-0.018606	0.996107	0.350643	0.999983	0.204636	0.999778	0.126117	0.880061	0.3899	0.999992	0.614104	0.999994	0.178486	0.999959
A4gnt	-1.63382	NA	-0.13381	NA	-0.990083	NA	1.31215	NA	-1.49671	NA	-0.91499	NA	-3.27316	NA	5.24595	NA	-6.22715	NA	-1.04012	NA	7.79723	NA	31.2589	NA	0.000811509	NA	-0.27121	NA	12.0225	NA	-0.0564916	NA	-0.238007	NA	-0.360756	NA
Aaas	0.194036	0.787719	0.62657	0.0142463	0.51826	0.101394	0.315398	0.401802	1.11671	1.84929e-07	0.012263	0.979047	0.0855629	0.888152	-0.148108	0.958815	0.238113	0.465873	0.247975	0.42749	0.22335	0.724081	0.0821934	0.945352	0.0142529	0.999983	-0.193139	0.999778	-0.0184278	0.996583	-0.188244	0.999992	0.00387998	0.999994	0.0685685	0.999959
Aacs	-0.257341	0.778834	-0.578267	0.111592	0.331534	0.487957	0.509767	0.244848	-0.363146	0.280071	-0.174483	0.761589	0.408947	0.410002	0.0706292	0.989467	0.554445	0.143566	0.42758	0.266161	0.566861	0.295607	0.404674	0.513353	-0.0524186	0.999983	0.109341	0.999778	-0.130403	0.894892	-0.026672	0.999992	0.129369	0.999994	0.0972364	0.999959
Aadac	-0.153423	0.971741	-0.118851	0.941553	-0.0353171	0.986235	0.170438	0.941593	-1.70371	0.0361336	0.347168	0.861609	-0.280553	0.785445	-0.51932	0.802642	-0.858345	0.139009	-0.671506	0.244276	-0.514741	0.665423	-0.492545	0.668993	0.153418	0.999983	-0.166883	0.999778	-0.252074	0.894521	0.895036	0.999992	0.558646	0.999994	0.890921	0.999959
Aadat	-1.21475	0.854067	-2.34816	0.305246	1.0929	0.690791	-1.03117	0.824887	-2.59042	0.12616	-0.121202	0.961103	-0.301944	0.772098	-0.857943	0.480798	-0.363243	0.609884	0.159703	0.84098	-0.729838	0.448098	0.664333	0.482662	0.0129974	0.999983	0.0201604	0.999778	0.0917274	0.978542	0.277384	0.999992	-0.0683436	0.999994	0.0157865	0.999959
Aagab	0.110286	0.711315	-0.00261112	0.990579	-0.103802	0.566276	0.0762232	0.739195	0.0117492	0.945542	0.293316	0.0686511	-0.100198	0.648521	0.00713305	0.989467	-0.161793	0.277562	-0.262639	0.0526302	-0.00245233	0.994835	0.0535622	0.920284	-0.0817078	0.999983	-0.0994208	0.999778	0.0506301	0.884506	-0.114529	0.999992	0.0212643	0.999994	0.187252	0.999959
Aak1	-0.032602	0.971741	0.229036	0.471583	0.112245	0.803563	0.102003	0.857103	0.108977	0.713138	-0.410254	0.225484	0.377798	0.280384	0.018087	0.989467	0.000378142	0.999252	0.19877	0.52408	-0.147421	0.844656	0.0971269	0.924639	0.0651469	0.999983	-0.0583167	0.999778	0.0278159	0.996583	-0.0945691	0.999992	0.0870411	0.999994	-0.00454021	0.999959
Aamdc	0.283445	0.851161	-0.854614	0.105962	-0.31379	0.693036	-0.671753	0.306085	-0.503725	0.305591	0.118088	0.922421	-0.545904	0.429106	0.580081	0.674014	-0.996644	0.0486825	-0.900766	0.0670584	-0.671839	0.424026	-0.683636	0.372422	0.0401773	0.999983	-0.270286	0.999778	0.0138444	0.996583	-0.0670834	0.999992	-0.192933	0.999994	-0.260073	0.999959
Aanat	-0.356626	NA	-0.563968	NA	0.715647	NA	-1.08905	NA	0.309307	NA	-0.422816	NA	-0.00839018	NA	2.20414	NA	-0.503724	NA	-0.564054	NA	-0.102786	NA	-0.0533684	NA	2.76337	NA	-0.129753	0.999778	0.0598668	NA	0.8521	0.999992	0.497281	NA	-1.2517	0.999959
Aar2	0.156325	0.762922	-0.20483	0.404001	-0.120323	0.713349	0.0806526	0.858798	-0.21616	0.262644	0.190025	0.500369	0.068426	0.882785	-0.157188	0.887894	-0.16484	0.541599	0.119003	0.65728	-0.050878	0.957716	0.0818046	0.922267	0.00440445	0.999983	0.155746	0.999778	-0.600723	0.00825636	0.0732021	0.999992	0.0410693	0.999994	-0.00703561	0.999959
Aard	0.118912	0.971741	1.09308	0.172842	0.0139554	0.990945	-0.258581	0.902981	0.756475	0.26242	-0.118861	0.939922	-0.375919	0.831003	-0.240467	0.989467	0.489936	0.613403	-0.333888	0.801204	-0.107	0.986711	-0.586157	0.762688	-0.0154141	0.999983	-0.145285	0.999778	-0.082032	0.985548	-0.104693	0.999992	-0.319591	0.999994	-0.162494	0.999959
Aars1	0.15834	0.787437	0.184399	0.516416	0.122469	0.733931	0.28235	0.330967	0.556552	0.00302601	-0.145632	0.664425	0.318965	0.270769	-0.116601	0.963182	-0.0376262	0.899888	0.421511	0.056538	0.222011	0.630212	0.00395895	0.996554	-0.122925	0.999983	0.0688616	0.999778	0.101594	0.856753	-0.0775749	0.999992	0.129439	0.999994	0.0491019	0.999959
Aars2	-0.100995	0.931876	0.169089	0.657699	0.731572	0.0245583	0.47143	0.164779	0.522839	0.0228077	-0.202382	0.618013	0.30103	0.45661	0.287746	0.728722	-0.258791	0.419913	0.300004	0.321568	0.408084	0.320353	-0.626753	0.0476908	-0.140199	0.999983	0.297136	0.999778	-0.414673	0.262758	0.103844	0.999992	-0.116933	0.999994	-0.344934	0.999959
Aasdh	-0.144987	0.812118	0.0796578	0.835468	-0.095667	0.812734	-0.0840524	0.866811	-0.0269489	0.933455	-0.0760862	0.859537	-0.184639	0.655552	0.152263	0.921193	0.375495	0.156308	0.540968	0.036311	0.250196	0.594122	-0.148821	0.828986	0.0381096	0.999983	0.218321	0.999778	0.171925	0.692153	-0.0957604	0.999992	0.125726	0.999994	0.0532349	0.999959
Aasdhppt	-0.38147	0.484156	0.1591	0.711422	-0.434976	0.214464	-0.595852	0.067573	-0.581987	0.0218895	0.240391	0.561622	-0.877799	0.00436582	-0.170253	0.942119	0.0631944	0.882221	-0.748372	0.00794219	0.39114	0.424096	0.0309436	0.996107	0.173798	0.999983	-0.321522	0.999778	0.149209	0.826277	0.090042	0.999992	-0.28588	0.999994	-0.0763021	0.999959
Aass	-0.240253	0.958105	-0.598596	0.604716	-1.23504	0.230899	0.319771	0.867361	-1.39727	0.0666703	-3.10558	0.000215116	0.0821728	0.999876	1.26735	0.613467	-0.0790415	0.955081	-0.415446	0.758334	-0.578979	0.812518	0.162354	0.984525	0.0584835	0.999983	0.162798	0.999778	-0.116079	0.988456	0.150147	0.999992	-0.097054	0.999994	-0.293488	0.999959
Aatf	0.105061	0.908227	0.609833	0.0116065	-0.0598163	0.911199	-0.156358	0.73554	0.734624	0.000511512	0.139848	0.732634	0.224875	0.575474	0.0456949	0.989467	0.0991453	0.78693	0.393674	0.144204	0.113958	0.894678	-0.181548	0.779187	-0.0161304	0.999983	0.0855477	0.999778	0.600011	0.0425819	0.00894073	0.999992	-0.0296272	0.999994	0.151606	0.999959
Aatk	-0.049772	0.973282	-0.919005	0.0390511	0.163863	0.846804	0.443026	0.517574	-0.720613	0.0708598	0.149646	0.865633	0.334696	0.668263	0.284182	0.929094	-0.255961	0.670923	0.305359	0.59287	-0.284722	0.813207	-0.219599	0.9007	-0.235026	0.999983	0.0315933	0.999778	-0.556582	0.39331	-0.0176067	0.999992	-0.0183992	0.999994	0.0298134	0.999959
Abat	-0.316797	0.898534	-1.1657	0.123399	-0.223483	0.876293	-0.792938	0.430277	-1.23192	0.0571467	-0.890902	0.350726	0.645548	0.541211	1.28753	0.332837	-1.33458	0.0661361	-0.454404	0.582465	-0.313076	0.894563	-1.63229	0.0461486	0.0227298	0.999983	0.0988298	0.999778	0.182431	0.939945	-0.0842837	0.999992	0.000885708	0.999994	-0.0102359	0.999959
Abca1	-0.452712	0.650351	-0.249114	0.712644	0.511648	0.391481	-0.059572	0.980874	-1.50332	7.15753e-05	-0.361463	0.582316	-0.356069	0.6536	-0.583395	0.629797	1.54489	0.000776271	0.947591	0.0630563	-0.240685	0.871666	0.731081	0.282297	0.337642	0.999983	-0.0883064	0.999778	0.161839	0.899137	0.0312237	0.999992	0.0602246	0.999994	-0.0474415	0.999959
Abca12	-1.16131	0.831884	-0.805774	0.787506	-1.13619	NA	1.43447	0.642508	-2.5837	0.14736	-2.19785	0.391911	-4.01136	NA	-0.710631	0.989467	-0.50376	NA	-4.12732	NA	-0.102793	NA	4.7909	NA	-1.23007	0.999983	-0.665285	0.999778	2.33161	0.575323	-0.536746	0.999992	-0.362368	0.999994	3.46722	0.999959
Abca13	-0.894481	0.733272	1.41519	0.176605	0.941219	0.539152	0.213947	0.939103	1.02618	0.272988	2.02672	0.142105	1.22947	0.590749	0.604455	0.965683	-0.34023	0.858379	0.661096	NA	1.44221	0.450709	-2.99156	0.196631	0.318199	0.999983	-0.186631	0.999778	0.57599	0.760941	0.615215	0.999992	0.205578	0.999994	0.756114	0.999959
Abca2	0.0192131	0.985685	-0.0363198	0.95352	0.780317	0.0653211	0.630782	0.14776	-0.0545321	0.930044	-0.280742	0.598117	0.291002	0.639445	0.0478759	0.989467	0.525421	0.200329	0.900864	0.0160027	-0.00931146	0.994283	-0.128414	0.931758	-0.077558	0.999983	0.105811	0.999778	-0.266644	0.70045	0.0822897	0.999992	-0.0185368	0.999994	0.00828284	0.999959
Abca4	-0.015324	0.994954	-0.582708	0.529171	-0.0226509	0.985346	-0.177026	0.929413	-0.80612	0.234887	0.672437	0.50236	-0.583054	0.736312	-0.569721	0.922276	-0.669643	0.500178	-0.0691619	0.95385	-0.171454	0.973064	0.602043	0.833357	0.513929	0.999983	-0.0261454	0.999778	-0.820587	0.47374	-0.538056	0.999992	-0.798061	0.999994	-0.47715	0.999959
Abca5	-0.706485	0.521915	-0.430305	0.572708	1.09504	0.09768	0.615503	0.440248	-1.70723	0.000353169	0.187186	0.866582	0.128665	0.942232	-0.246885	0.984793	0.502573	0.490953	0.164709	0.855774	-0.158934	0.948071	0.286809	0.898084	0.264924	0.999983	-0.204267	0.999778	0.189626	0.906863	-0.0771257	0.999992	0.0294513	0.999994	-0.00665179	0.999959
Abca7	0.302003	0.786997	-0.143992	0.845539	0.855377	0.0763657	0.60038	0.256118	0.057339	0.93298	-0.249452	0.701137	0.712376	0.17455	-0.0572697	0.989467	-0.499254	0.280195	0.179609	0.737736	-0.263137	0.813536	-0.358541	0.689177	0.453838	0.999983	0.0265321	0.999778	-0.281041	0.742624	0.290616	0.999992	0.0571173	0.999994	-0.318805	0.999959
Abca9	-0.197809	0.914679	-0.18341	0.830503	-0.170068	0.859699	-0.161929	0.890672	-1.11243	0.0102326	-0.764099	0.248115	0.0109253	0.999876	-0.035859	0.989467	1.18703	0.0305763	0.0194824	0.979655	-0.378878	0.764581	0.146675	0.953596	0.433514	0.999983	-0.0847583	0.999778	0.158953	0.91289	0.126486	0.999992	0.416572	0.999994	-0.0882331	0.999959
Abcb1	0.182459	0.912463	-0.284691	0.656732	0.203019	0.796454	0.341597	0.640688	-0.0469261	0.941787	-0.475216	0.436152	0.547408	0.368713	-0.814822	0.335653	-0.274453	0.625251	-0.184327	0.747696	-0.257643	0.842696	0.778894	0.192303	0.500213	0.999983	0.239079	0.999778	0.438114	0.574703	0.532981	0.999992	0.455395	0.999994	0.197654	0.999959
Abcb10	-0.284477	0.754429	-0.216994	0.673379	0.116342	0.870432	-0.0267118	0.99019	-0.633805	0.04752	-0.0866881	0.920424	0.286135	0.607202	-0.296287	0.853008	-0.0232854	0.963092	0.00870268	0.985038	-0.274587	0.741465	-0.422495	0.485801	0.00369683	0.999983	0.0374135	0.999778	0.148432	0.879236	-0.110498	0.999992	0.0884819	0.999994	0.0822171	0.999959
Abcb11	0.148027	NA	-0.18595	NA	-0.412503	NA	-1.08913	NA	0.751625	NA	-2.30792	NA	2.0633	NA	2.08126	NA	0.340801	NA	-2.24875	NA	2.4085	NA	0.908421	NA	-0.986399	NA	-3.16202	0.999778	1.53919	NA	1.0806	0.999992	-0.973218	NA	0.671795	0.999959
Abcb5	0.654102	NA	1.87094	NA	-2.11316	NA	-0.127337	NA	2.74969	NA	1.6737	NA	2.12333	NA	-0.649399	NA	0.458035	NA	-0.564094	NA	0.859001	NA	0.908422	NA	-0.3897	0.999983	1.79807	0.999778	-2.10912	NA	-1.5979	0.999992	-0.574842	NA	0.207933	0.999959
Abcb6	0.0512587	0.971741	-0.550465	0.0138901	-0.0618259	0.897869	-0.23691	0.485376	-0.609689	0.00204701	0.0862575	0.845217	-0.219181	0.513275	-0.141119	0.930089	-0.701931	0.00154547	-0.249299	0.303627	0.0881226	0.915732	-0.0118929	0.996107	0.064815	0.999983	0.00172155	0.999778	0.186256	0.666406	0.0436979	0.999992	0.0432496	0.999994	0.0783849	0.999959
Abcb7	-0.261488	0.721868	0.347093	0.328347	-0.329679	0.414207	-0.394823	0.322339	-0.499705	0.0666703	-0.492137	0.22412	-0.3266	0.445332	-0.143975	0.970608	0.0849185	0.853536	-0.264108	0.434196	0.272317	0.68277	-0.283043	0.64318	0.170734	0.999983	-0.187823	0.999778	0.373484	0.424264	0.209213	0.999992	-0.138219	0.999994	0.00140344	0.999959
Abcb8	0.0649374	0.969782	-0.113042	0.802731	0.468888	0.15152	0.251649	0.545596	0.176279	0.546833	0.431893	0.243455	0.0234139	0.99823	0.184185	0.915929	-0.550892	0.0544013	0.0431662	0.906102	0.141556	0.872775	-0.287094	0.580798	-0.125025	0.999983	0.289034	0.999778	-0.533178	0.128443	0.0326675	0.999992	0.0502274	0.999994	0.133304	0.999959
Abcb9	0.152363	0.966969	-0.118155	0.913886	0.610245	0.46028	0.821099	0.302916	0.133246	0.875027	0.27637	0.790466	0.35064	0.740834	1.1344	0.291559	-1.60121	0.00654855	0.0535	0.945102	1.09479	0.184314	-0.122267	0.975567	-0.21822	0.999983	0.0759844	0.999778	-0.456216	0.683066	0.0562802	0.999992	0.0345221	0.999994	-0.224001	0.999959
Abcc1	0.343281	0.779725	0.336469	0.594243	0.560299	0.350131	0.729017	0.202104	0.448911	0.321281	-0.112517	0.91947	0.300617	0.721391	-0.0336441	0.989467	1.08745	0.0231665	0.951927	0.0477999	0.181773	0.917685	1.35639	0.00659048	0.169694	0.999983	0.00869625	0.999778	0.0713458	0.982896	0.163002	0.999992	0.227058	0.999994	-0.0928737	0.999959
Abcc10	0.452952	0.649791	-0.00938642	0.990373	0.94775	0.0726787	0.800889	0.135147	0.251092	0.592529	-0.147825	0.863547	0.969353	0.0492614	0.114759	0.989467	-0.709007	0.116296	0.257547	0.617433	0.225087	0.861937	-0.507142	0.484837	0.0449316	0.999983	-0.0506485	0.999778	-0.526368	0.453861	-0.00152526	0.999992	0.0266899	0.999994	-0.0116442	0.999959
Abcc12	1.06518	0.833141	0.375468	0.878879	1.60039	NA	-0.887453	0.761454	3.19796	0.0551017	1.43349	0.672586	-0.587037	NA	-1.23618	0.939385	1.36517	NA	-1.76801	NA	0.469773	NA	0.900873	0.889233	0.129871	0.999983	-0.0944535	0.999778	0.0372524	0.996583	-0.283961	0.999992	-0.645081	0.999994	0.132271	0.999959
Abcc2	-1.05118	0.613824	2.32729	0.00523541	-0.409497	0.826776	-0.253559	0.915306	2.53923	0.000830008	-0.324556	0.875856	1.39977	0.182048	0.423171	0.965739	-0.739556	0.448653	-0.366772	0.730199	-0.223198	0.950161	-1.67029	0.113296	0.204801	0.999983	0.184767	0.999778	0.28624	0.905729	0.359659	0.999992	0.417106	0.999994	0.294894	0.999959
Abcc3	0.0268469	0.986792	0.00928207	0.99241	-0.164509	0.879346	0.236216	0.841162	-0.296426	0.621585	-0.428704	0.588168	0.59544	0.429106	0.85896	0.454314	-1.25989	0.0195957	0.131873	0.855774	0.843808	0.305203	-0.241713	0.911015	-0.487711	0.999983	0.579975	0.999778	-0.0437301	0.996583	-0.0829315	0.999992	0.380647	0.999994	0.202277	0.999959
Abcc4	-0.153318	0.886774	-0.172205	0.728701	0.0648013	0.932467	0.170431	0.798296	0.107642	0.796017	-0.443565	0.312447	0.243059	0.680738	-0.495614	0.526063	0.72386	0.0418612	0.685905	0.053948	-0.151406	0.894359	0.198258	0.851128	0.149676	0.999983	0.192384	0.999778	0.135165	0.887618	0.070283	0.999992	0.294046	0.999994	0.141896	0.999959
Abcc5	-0.14694	0.834029	-0.304467	0.26773	0.00859825	0.983648	0.136142	0.767131	-0.794152	7.92802e-05	-0.221266	0.511201	0.237048	0.517686	-0.364412	0.505734	-0.167413	0.587509	-0.233133	0.392173	-0.375122	0.31215	-0.0841965	0.931014	0.0291645	0.999983	0.232901	0.999778	0.114236	0.851655	0.0885581	0.999992	0.1813	0.999994	-0.0965854	0.999959
Abcc6	0.576566	0.596179	-0.13459	0.899983	-0.0425959	0.965856	1.2444	0.0282106	-0.804868	0.0802522	-0.496158	0.485257	0.558803	0.408771	-0.236683	0.968585	-0.772732	0.136756	0.169815	0.796617	-0.21816	0.89426	-0.622138	0.431451	0.0127205	0.999983	0.000929397	0.999778	-0.00414206	0.998143	0.765498	0.999992	0.515179	0.999994	0.486134	0.999959
Abcc8	0.363652	0.922123	-1.40979	0.180695	3.59321	0.0944282	0.613125	0.738823	-1.29944	0.116018	-0.194434	0.930745	1.27624	0.193152	0.435862	0.920931	0.680278	0.419429	0.929389	0.240644	1.24882	0.162499	0.0876377	0.996107	-0.0593763	0.999983	0.0958293	0.999778	-0.346693	0.781539	-0.134476	0.999992	0.127445	0.999994	-0.0214779	0.999959
Abcc9	1.31723	0.00127753	0.678862	0.12124	-0.195524	0.787474	1.46163	0.000124039	0.918143	0.0109596	-0.65973	0.235742	0.598246	0.276691	-0.0149318	0.990168	0.891534	0.0358442	0.185406	0.73052	-0.266745	0.810531	-0.281709	0.79779	0.152234	0.999983	-0.0120937	0.999778	0.0270292	0.996583	0.320792	0.999992	0.168037	0.999994	0.031704	0.999959
Abcd1	0.426462	0.409079	0.439202	0.15707	0.259513	0.524503	0.527163	0.121222	0.565649	0.0263097	0.0344776	0.946566	0.322097	0.428587	-0.0563104	0.989467	-0.401415	0.202873	0.069485	0.855912	-0.0357922	0.992151	-0.277939	0.634856	0.158355	0.999983	0.219072	0.999778	-0.15274	0.836645	0.165192	0.999992	0.137811	0.999994	0.272937	0.999959
Abcd2	-0.180511	0.942215	-1.22657	0.0219604	-0.162366	0.882066	-1.36636	0.0181589	-1.4706	0.00181987	-0.633869	0.389665	1.16185	0.153089	0.243195	0.987	0.812978	0.233871	-0.218992	0.80547	-1.11	0.159728	-0.0563784	0.996107	0.179707	0.999983	-0.121941	0.999778	0.193133	0.899137	0.0936259	0.999992	-0.124548	0.999994	-0.0983009	0.999959
Abcd3	-0.188296	0.768721	-0.224926	0.470841	-0.213472	0.546901	-0.321668	0.324324	-1.00511	6.61114e-07	-0.170673	0.649591	0.067862	0.904715	0.0831232	0.989467	-0.558339	0.0250466	-0.370953	0.142993	0.22525	0.679972	-0.267915	0.547633	0.125554	0.999983	-0.108422	0.999778	0.0267753	0.996583	-0.0127217	0.999992	-0.203436	0.999994	0.0143432	0.999959
Abcd4	0.192051	0.894056	-0.15582	0.833193	0.482171	0.390917	0.406791	0.519604	-0.158571	0.760075	0.108122	0.913119	0.0907451	0.934277	-0.433486	0.754964	-0.584907	0.199353	-0.480735	0.283372	-0.543591	0.463584	-0.36067	0.693332	-0.121554	0.999983	-0.0460668	0.999778	-0.100001	0.953287	-0.0643276	0.999992	-0.0188669	0.999994	0.184746	0.999959
Abce1	-0.278329	0.500479	0.195703	0.472294	-0.333053	0.202084	-0.292001	0.297534	-0.18659	0.388792	-0.202104	0.50004	-0.141299	0.70221	0.0359748	0.989467	-0.0958021	0.745039	-0.0101454	0.970575	0.386009	0.200196	-0.104524	0.898084	0.0710484	0.999983	-0.16258	0.999778	0.380757	0.180397	-0.0346465	0.999992	-0.101745	0.999994	-0.0231865	0.999959
Abcf1	0.329452	0.454176	0.22274	0.452624	0.481103	0.0825671	0.251615	0.459041	0.696903	0.000477136	0.172346	0.627285	0.279455	0.395628	0.0843918	0.989467	-0.157956	0.599274	0.329405	0.185337	0.139244	0.839939	-0.113704	0.900098	-0.119671	0.999983	0.00413074	0.999778	0.130678	0.811636	0.081537	0.999992	-0.0179851	0.999994	-0.0605717	0.999959
Abcf3	0.162153	0.771571	0.00609217	0.987109	0.139737	0.679797	0.107311	0.809643	0.211213	0.311221	0.206099	0.488682	0.20079	0.535549	0.0602824	0.989467	-0.437762	0.0487855	-0.150409	0.552597	0.0732825	0.926836	-0.370728	0.204988	-0.0234128	0.999983	0.14319	0.999778	-0.123033	0.799288	-0.0100059	0.999992	0.0635477	0.999994	0.0319206	0.999959
Abcg1	-0.0427821	0.980528	-1.65577	0.00442514	-0.148559	0.90949	0.969053	0.208793	-2.77294	4.12534e-08	-0.361082	0.713525	-0.0404618	0.999876	-1.02185	0.480256	1.28569	0.0576932	0.808051	0.261567	0.651972	0.639448	2.02812	0.00325853	-0.0705038	0.999983	0.162598	0.999778	-0.271759	0.870423	0.114471	0.999992	0.0115165	0.999994	-0.0100009	0.999959
Abcg4	1.18519	0.000662456	0.482416	0.229005	0.690539	0.16613	1.31177	0.000246578	0.323156	0.366214	0.152741	0.830649	0.440683	0.643666	-0.10977	0.989467	0.334303	0.619151	0.437906	0.580523	0.0928158	0.966982	-0.532132	0.516973	-0.0646624	0.999983	0.051812	0.999778	-0.23287	0.696452	0.0322216	0.999992	0.0354564	0.999994	0.0681321	0.999959
Abcg5	-2.00181	0.626474	2.87867	0.217896	-0.894248	0.81354	-1.02688	0.843284	-0.626657	0.81067	-0.422847	0.930878	0.33145	0.888048	-0.829422	0.880541	-0.431468	0.777734	-0.714818	0.576477	-0.649808	0.834776	-0.637315	0.846941	-1.97954	0.999983	2.86129	0.999778	1.15733	0.79389	-1.03347	0.999992	2.36691	0.999994	0.563316	0.999959
Abcg8	0.286106	0.971741	-1.15757	0.687254	-0.245948	0.960682	1.79694	0.567347	-0.319216	0.922275	1.43139	0.686576	0.637851	0.628023	-0.327743	0.989467	-0.829104	0.380341	-0.319587	0.767059	-0.365692	0.897148	-0.802001	0.623117	0.53188	0.999983	-3.17895	0.999778	0.79814	0.846491	2.42361	0.999992	-2.115	0.999994	0.598246	0.999959
Abhd1	0.213503	0.883884	0.0963296	0.906063	0.242254	0.745885	-0.3167	0.673155	0.234249	0.636737	0.151914	0.862017	-0.0951475	0.932933	-0.0271878	0.989467	-1.18678	0.00562956	-0.447443	0.341894	-0.392996	0.683486	-0.859028	0.120204	-0.0776154	0.999983	0.0484709	0.999778	0.0642452	0.987428	0.181041	0.999992	0.123267	0.999994	0.0594893	0.999959
Abhd10	0.184592	0.824295	0.349973	0.297888	-0.345193	0.365322	-0.385797	0.313717	0.282927	0.316058	-0.304782	0.449555	0.088015	0.89517	-0.186329	0.928117	0.495724	0.121181	-0.137475	0.725988	0.0817639	0.946965	-0.245564	0.71862	0.223075	0.999983	0.206449	0.999778	0.171468	0.787284	-0.110087	0.999992	-0.502079	0.999994	-0.193069	0.999959
Abhd11	0.360749	0.567794	-0.00796197	0.98832	0.177252	0.725854	-0.143673	0.828905	0.322846	0.283081	0.550194	0.190805	-0.121808	0.839852	0.319305	0.753104	-0.273899	0.450788	-0.363575	0.269795	0.137807	0.895413	0.0842077	0.954307	-0.149087	0.999983	-0.112095	0.999778	0.164356	0.823856	-0.0257202	0.999992	0.031307	0.999994	-0.0415936	0.999959
Abhd12	0.209811	0.815714	0.148793	0.772232	-0.0377745	0.960682	0.492637	0.224699	-0.0942394	0.825922	0.232483	0.631471	-0.215959	0.687605	-0.197466	0.933946	-0.925886	0.00338325	-0.330202	0.343672	-0.166257	0.871123	-0.0614891	0.980434	-0.0817983	0.999983	0.0437372	0.999778	-0.343033	0.518301	-0.127844	0.999992	0.0212204	0.999994	0.00889624	0.999959
Abhd12b	2.20555	0.43309	1.41345	0.40595	1.08986	NA	-0.90998	0.735244	0.0881224	0.956724	1.96642	0.255768	-0.970186	NA	0.251164	0.989467	-0.50376	NA	-0.564095	NA	-0.102793	NA	2.83783	NA	-0.231803	0.999983	-1.15639	0.999778	0.424498	0.894521	-0.829298	0.999992	0.512426	0.999994	0.668013	0.999959
Abhd13	-0.163616	0.694714	-0.0844047	0.765279	-0.244164	0.283836	0.186902	0.465271	-0.437681	0.00451972	0.103492	0.718762	-0.27491	0.259716	-0.189763	0.748431	0.0922337	0.714423	-0.220893	0.268643	0.109843	0.831906	0.420034	0.0576108	0.00778611	0.999983	-0.0411614	0.999778	-0.210008	0.480876	-0.03955	0.999992	-0.0548743	0.999994	0.0742951	0.999959
Abhd14a	0.118852	0.886774	-1.20302	1.4116e-08	0.343615	0.280314	0.108364	0.847754	-1.11722	6.61297e-08	0.169166	0.66398	-0.296419	0.509479	0.150735	0.962	0.031951	0.936661	-0.11513	0.764207	-0.408733	0.362098	-0.390598	0.39828	-0.173303	0.999983	0.0805223	0.999778	-0.113316	0.866825	-0.032395	0.999992	-0.0102968	0.999994	0.0640282	0.999959
Abhd14b	0.17425	0.861063	-0.857274	0.00494621	0.0903433	0.889815	0.050342	0.970304	-0.837487	0.00270506	0.0951601	0.891491	-0.340716	0.455482	-0.26355	0.861323	-0.422181	0.229649	-0.712845	0.0228656	-0.582044	0.191258	-0.191094	0.841174	-0.0493802	0.999983	0.182956	0.999778	0.304177	0.702929	0.125174	0.999992	-0.156705	0.999994	0.222302	0.999959
Abhd15	-0.335499	0.768721	-0.240497	0.713051	0.378882	0.556155	-0.338038	0.63458	0.0492539	0.937784	-0.28151	0.681102	-0.273226	0.739301	-0.354341	0.873093	0.510717	0.311791	0.188114	0.7632	0.144289	0.930937	0.390464	0.693756	0.229077	0.999983	0.0369867	0.999778	0.401122	0.62597	0.530065	0.999992	0.236283	0.999994	-0.221468	0.999959
Abhd16a	0.198782	0.878501	0.0351141	0.960158	0.979571	0.0346985	0.737735	0.124152	0.587354	0.113761	0.564106	0.295053	-0.070967	0.955898	-0.0251664	0.989467	-0.17478	0.753377	-0.00391717	0.993832	0.0140336	0.992655	0.0247233	0.996107	-0.34251	0.999983	0.0547233	0.999778	-0.787579	0.125191	0.0573328	0.999992	-0.0399466	0.999994	-0.185785	0.999959
Abhd16b	-1.41638	NA	-0.220305	NA	-2.71481	NA	-0.589928	NA	-1.80983	NA	-1.64983	NA	-0.00839076	NA	0.251163	NA	0.458034	NA	-0.564093	NA	-0.102793	NA	-0.053372	NA	-0.0246062	NA	-0.164044	0.999778	-1.80264	NA	0.913716	0.999992	-0.174342	NA	-0.289997	0.999959
Abhd17a	0.143688	0.862669	-0.166299	0.666315	0.178491	0.671661	0.145778	0.785631	0.346088	0.167547	0.230559	0.548555	0.0300918	0.985501	0.0279951	0.989467	-0.528424	0.0552938	-0.298259	0.298961	0.0774711	0.942575	-0.00174737	0.997949	-0.342389	0.999983	-0.0874057	0.999778	-0.516704	0.130551	-0.0623678	0.999992	-0.0089174	0.999994	-0.0758591	0.999959
Abhd17b	-0.234568	0.717039	-0.0303094	0.948079	-0.373956	0.264471	-0.586176	0.0492612	-0.732437	0.00136311	0.146876	0.73583	-0.472059	0.170475	0.0208721	0.989467	-0.186337	0.588433	-0.918816	0.000547436	0.00334668	0.996008	0.0126557	0.996107	0.113405	0.999983	-0.315757	0.999778	-0.0500049	0.969116	0.0549436	0.999992	-0.483097	0.999994	-0.0759758	0.999959
Abhd17c	-0.0757914	0.941263	-0.266823	0.319851	-0.207776	0.518288	-0.16123	0.676015	-0.689597	0.000342054	0.165092	0.629176	-0.160738	0.662376	-0.182253	0.864371	-0.325718	0.1791	-0.256423	0.288158	0.119044	0.864321	-0.265132	0.493512	-0.0126418	0.999983	-0.206787	0.999778	0.107211	0.860043	-0.0286008	0.999992	-0.173356	0.999994	0.0322174	0.999959
Abhd18	-0.948716	0.295765	0.304236	0.713075	1.19728	0.0756009	-0.104367	0.956048	-0.343595	0.566076	-0.395857	0.638506	0.455626	0.597539	-0.62905	0.687781	0.300259	0.678593	0.628821	0.291463	-0.021429	0.992151	-0.106814	0.979499	0.128591	0.999983	0.137779	0.999778	-0.0857389	0.981937	0.24346	0.999992	0.114037	0.999994	0.0326157	0.999959
Abhd2	-0.217484	0.83801	0.160175	0.785356	0.536992	0.229619	0.5746	0.202104	-0.20172	0.617238	-0.141477	0.832441	0.747886	0.0810677	0.306468	0.85162	-1.31839	0.000174373	-0.225823	0.602244	0.349863	0.656556	-0.101739	0.951575	0.127548	0.999983	-0.0605091	0.999778	0.115012	0.914553	0.0532377	0.999992	0.107947	0.999994	0.180832	0.999959
Abhd3	-0.333834	0.850701	-1.20151	0.0414581	-0.731463	0.332127	-0.450315	0.638475	-1.56933	0.00190816	-0.435592	0.617913	0.120971	0.939244	0.683204	0.680246	-2.5082	6.10158e-06	-0.77129	0.20724	0.584873	0.638858	-0.969399	0.232101	0.0522851	0.999983	-0.212147	0.999778	0.405197	0.731871	-0.00820031	0.999992	-0.278824	0.999994	-0.0193266	0.999959
Abhd4	-0.118661	0.919387	-0.824823	0.0035833	0.174678	0.724829	0.0781651	0.923082	-0.402094	0.156831	0.0833524	0.902653	-0.160156	0.776541	0.106506	0.989467	-1.0648	0.000308253	-0.672019	0.024185	-0.439427	0.369676	0.188823	0.829717	-0.0336771	0.999983	0.0870048	0.999778	-0.100245	0.909039	0.0702699	0.999992	0.17339	0.999994	0.115963	0.999959
Abhd5	0.0811718	0.95613	-0.210243	0.575844	-0.289804	0.439667	0.247063	0.559258	-0.411079	0.107297	0.0141942	0.976889	-0.125696	0.823032	-0.472041	0.406462	-0.164679	0.650099	-0.590631	0.0338076	-0.311049	0.574375	0.563957	0.115904	0.034211	0.999983	-0.0790794	0.999778	0.0407296	0.986614	-0.0289049	0.999992	-0.161029	0.999994	-0.0850932	0.999959
Abhd6	0.0816604	0.971741	0.0997979	0.904889	0.0446324	0.960682	-0.104052	0.936078	0.11983	0.844792	0.208983	0.789235	-0.133065	0.892162	-1.01898	0.139123	-0.0582457	0.923852	-0.031888	0.95637	-0.483978	0.591377	0.143267	0.940059	-0.149812	0.999983	-0.0701581	0.999778	-0.110236	0.946876	-0.0196822	0.999992	0.12362	0.999994	0.21521	0.999959
Abhd8	0.443274	0.768721	-0.0718767	0.942734	1.07	0.111899	0.801047	0.291127	0.39857	0.503498	0.742337	0.334765	0.0477259	0.999876	0.381943	0.920356	0.476894	0.495051	0.246784	0.753158	-0.454193	0.742666	0.464833	0.733652	-0.452306	0.999983	-0.154358	0.999778	-0.52535	0.598874	0.0442045	0.999992	0.0301436	0.999994	-0.0127219	0.999959
Abi1	-0.255031	0.602628	0.187396	0.54645	-0.181742	0.604262	-0.0809729	0.883256	-0.500627	0.0148245	-0.209189	0.526654	-0.378612	0.209718	-0.240065	0.758877	0.0786088	0.819805	-0.24827	0.334578	0.218735	0.670961	0.0501047	0.97315	0.181233	0.999983	-0.249101	0.999778	0.347281	0.30132	0.0377828	0.999992	0.0153233	0.999994	-0.0303028	0.999959
Abi2	-0.531404	0.153602	-0.190565	0.593091	-0.106354	0.822794	-0.184581	0.674214	-0.479542	0.0391751	-0.237916	0.51566	-0.2551	0.600265	0.206539	0.886372	0.769269	0.00641448	0.600912	0.0621859	-0.513446	0.175089	0.0264264	0.996107	0.141833	0.999983	-0.308673	0.999778	0.116824	0.862849	-0.0569006	0.999992	0.0964941	0.999994	0.123324	0.999959
Abi3	1.45135	0.014944	0.53026	0.427581	0.392353	0.630119	1.21657	0.0408324	1.04048	0.029546	0.257687	0.779345	-0.306511	0.755963	-0.738902	0.578481	0.304342	0.663035	0.152185	0.845875	-0.283989	0.870211	0.854972	0.2762	0.359267	0.999983	0.337336	0.999778	-0.391409	0.759439	-0.139294	0.999992	0.367932	0.999994	0.0224791	0.999959
Abitram	0.0833384	0.929122	0.426671	0.0685476	-0.160687	0.650621	-0.0480591	0.9463	0.369897	0.0716719	0.170222	0.623132	-0.000507756	0.999876	0.0508213	0.989467	0.384748	0.145889	-0.0408124	0.905222	0.246878	0.625706	0.23231	0.642793	-0.261446	0.999983	0.529553	0.999778	0.195681	0.641059	-0.0833497	0.999992	0.0177747	0.999994	0.247088	0.999959
Abl1	-0.183511	0.837603	-0.334053	0.358647	0.579151	0.105601	0.440618	0.256118	-0.00743783	0.983744	0.167044	0.733931	0.708724	0.045122	0.0791072	0.989467	0.23297	0.534831	0.909101	0.00201734	0.117283	0.918566	-0.34761	0.515931	-0.0482257	0.999983	0.0306994	0.999778	-0.264276	0.636341	-0.0365252	0.999992	0.187622	0.999994	0.0848181	0.999959
Abl2	-0.765725	0.474252	-0.145259	0.90176	0.57507	0.464545	0.333765	0.753615	-0.750799	0.157266	-0.720956	0.342874	0.673117	0.405486	0.169295	0.989467	0.735272	0.254907	1.71668	0.0031437	0.300876	0.867099	-0.530538	0.662601	0.190053	0.999983	-0.247126	0.999778	0.0410502	0.996583	0.0890782	0.999992	0.101159	0.999994	0.137536	0.999959
Ablim1	-0.0685346	0.968737	-0.47736	0.103734	-0.0353316	0.960682	0.0190699	0.99019	-0.603976	0.0139031	-0.306318	0.420727	0.397028	0.288012	0.0857473	0.989467	0.331803	0.293798	0.611718	0.0284088	0.157251	0.850688	0.361332	0.431451	-0.12699	0.999983	0.0331689	0.999778	-0.161555	0.795939	0.0371398	0.999992	-0.161405	0.999994	0.0262155	0.999959
Ablim2	-0.119571	0.925616	-0.714389	0.0182748	0.682828	0.0830468	0.43621	0.330447	-0.651708	0.0108387	-0.144389	0.780067	-0.124963	0.849599	0.60346	0.280496	0.168589	0.696265	-0.130051	0.759015	-0.751923	0.0235751	0.141714	0.91134	-0.064073	0.999983	0.00535806	0.999778	0.148766	0.78175	0.0369941	0.999992	0.00566133	0.999994	-0.019725	0.999959
Ablim3	-0.166334	0.847427	-0.805728	0.00259449	-0.165266	0.726101	-0.27944	0.512268	-0.708853	0.00444285	-0.693196	0.0599781	0.0883249	0.917856	0.394578	0.640078	0.361618	0.337057	-0.102555	0.838049	-0.914282	0.0117393	-0.593276	0.186467	-0.182205	0.999983	0.15067	0.999778	-0.0292022	0.996583	0.124775	0.999992	-0.257105	0.999994	-0.0728369	0.999959
Abr	0.165341	0.803926	0.467693	0.0558568	0.107526	0.801485	0.49264	0.0747601	0.351117	0.113825	-0.367695	0.254891	0.679702	0.0118069	0.174395	0.895405	-0.189029	0.524409	0.745044	0.00159313	0.314571	0.463584	-0.466041	0.139983	0.0310823	0.999983	-0.193833	0.999778	0.0308083	0.992231	-0.0629466	0.999992	0.214281	0.999994	0.15231	0.999959
Abra	2.1525	NA	-0.684185	0.833061	1.54442	NA	0.568115	0.93004	-2.87939	0.179278	1.38772	NA	-0.490993	NA	0.974679	0.950888	-0.119691	NA	-0.676449	NA	-2.78572	NA	-3.34375	NA	-0.930454	0.999983	-0.163701	0.999778	-1.06957	0.777856	-0.0480761	0.999992	2.29675	0.999994	1.27485	0.999959
Abracl	0.0627246	0.971741	0.48098	0.240278	-0.587626	0.175791	-0.542372	0.237111	0.386566	0.27262	0.370547	0.459431	-0.957668	0.0174221	-0.212078	0.945291	-0.240138	0.600523	-0.898538	0.0109428	0.00661957	0.995078	-0.0139022	0.996107	0.0530617	0.999983	-0.497473	0.999778	0.360662	0.593884	-0.120831	0.999992	0.10159	0.999994	-0.53408	0.999959
Abraxas1	0.0518701	0.971741	0.185411	0.672692	0.0783664	0.90166	-0.540279	0.13496	-0.179882	0.584702	0.0195864	0.970589	-0.22344	0.712907	0.177375	0.954669	0.149511	0.741324	-0.0944049	0.854143	-0.0173144	0.992151	0.163291	0.891886	0.082991	0.999983	0.690072	0.999778	-0.0611617	0.974811	-0.289984	0.999992	-0.296932	0.999994	-0.137672	0.999959
Abraxas2	-0.303718	0.665016	-0.0520618	0.927198	0.190031	0.713046	0.329358	0.462518	-0.466758	0.104156	-0.335457	0.432473	0.172143	0.771141	-0.0626245	0.989467	0.0115126	0.9798	0.116126	0.788935	0.232239	0.764521	-0.311555	0.61911	0.197467	0.999983	-0.25282	0.999778	0.395547	0.422694	-0.0977337	0.999992	0.270123	0.999994	0.0093734	0.999959
Abt1	-0.100557	0.849928	0.0812132	0.773235	0.0683178	0.834689	0.0330866	0.956719	0.316678	0.0424484	0.204915	0.393992	-0.0270718	0.971444	0.0858084	0.971228	-0.210659	0.310871	-0.132426	0.548943	0.106378	0.837796	-0.0706723	0.92097	-0.0282984	0.999983	0.149154	0.999778	0.128441	0.708793	-0.0896838	0.999992	-0.217456	0.999994	0.0286626	0.999959
Abtb1	0.374374	0.539936	-0.231058	0.578238	0.469312	0.210104	0.717986	0.0326126	0.289956	0.337616	0.411508	0.318102	0.112272	0.862138	0.112651	0.989467	-0.791897	0.0119944	-0.428959	0.187244	-0.198359	0.812161	-0.138285	0.91134	-0.0145117	0.999983	0.0739025	0.999778	-0.666194	0.0877953	0.104295	0.999992	0.168468	0.999994	-0.135225	0.999959
Abtb2	0.145425	0.885191	0.111307	0.830577	0.139934	0.798099	-0.0417419	0.978071	-0.259042	0.384092	0.095183	0.88188	0.731637	0.0936328	0.298481	0.844854	0.0116743	0.982814	0.518933	0.268219	0.111711	0.936608	0.0620882	0.989858	-0.112318	0.999983	-0.246579	0.999778	-0.131452	0.869684	0.118945	0.999992	-0.208724	0.999994	0.37444	0.999959
Acaa2	0.374756	0.793209	-0.600691	0.33688	-0.196343	0.842685	-2.10145	7.76964e-06	0.0421815	0.952971	0.0314201	0.972365	0.286655	0.765648	0.625622	0.669226	-0.538433	0.370213	-0.41494	0.487282	0.0949275	0.978769	-0.265302	0.888226	-0.00101593	0.999983	0.252961	0.999778	-0.172783	0.910588	-0.0358267	0.999992	-0.0661775	0.999994	0.0701976	0.999959
Acaca	-0.385347	0.55773	-0.251439	0.567411	0.13878	0.813801	-0.223184	0.690455	-0.533845	0.0714768	-0.913322	0.0169375	0.591397	0.156626	0.236146	0.895651	0.516937	0.144567	1.06329	0.000919203	0.389691	0.531432	-0.170773	0.880334	-0.0279947	0.999983	-0.0733953	0.999778	0.0560775	0.974811	-0.0912071	0.999992	-0.0138184	0.999994	0.0782609	0.999959
Acacb	-0.650196	0.576225	-0.865218	0.159096	1.11314	0.0950828	-0.281537	0.81315	-1.71604	0.000352157	-0.664423	0.38587	0.435667	0.658947	0.368878	0.929094	0.465007	0.520665	0.885871	0.156946	0.503464	0.703105	-0.314152	0.873396	0.00353579	0.999983	0.253435	0.999778	-0.293625	0.832796	0.0356054	0.999992	0.0150228	0.999994	0.0400611	0.999959
Acad10	0.00367383	0.997843	-0.68876	0.0812216	0.281184	0.62868	-0.627849	0.178914	-0.712426	0.036535	-0.0822253	0.930571	0.197656	0.784546	0.0198272	0.989467	-0.247946	0.611252	-0.383877	0.357196	-0.218434	0.844656	-0.543839	0.350793	0.0455862	0.999983	0.107968	0.999778	-0.589867	0.280435	-0.0966407	0.999992	0.0497851	0.999994	-0.154447	0.999959
Acad11	-0.198421	0.888501	-0.571873	0.237232	-0.0612585	0.95979	-0.266866	0.73391	-1.0966	0.00308039	-0.275748	0.679281	0.472099	0.431867	-0.0166194	0.989799	-0.908904	0.0378764	-0.485295	0.288937	-0.451471	0.602158	-0.849037	0.119118	-0.0797071	0.999983	0.0800437	0.999778	-0.0221923	0.996583	-0.0251556	0.999992	0.080836	0.999994	0.135046	0.999959
Acad8	0.255321	0.693858	-0.487096	0.0903347	0.209767	0.618289	-0.301612	0.43921	-0.25827	0.340969	0.0991112	0.852604	0.00833761	0.999876	0.285871	0.765831	-0.362292	0.257504	0.16856	0.634509	0.0435197	0.985985	-0.202486	0.778228	-0.109069	0.999983	0.239592	0.999778	-0.380241	0.348393	0.269621	0.999992	-0.107417	0.999994	0.0725948	0.999959
Acad9	0.0256109	0.971741	0.158953	0.437512	-0.245422	0.230945	-0.180559	0.440038	0.205292	0.18234	-0.0324745	0.930745	0.0886558	0.771672	0.0755326	0.974463	-0.300225	0.0808963	0.098372	0.622448	0.242308	0.34377	0.0741736	0.909425	-0.0783544	0.999983	-0.0489568	0.999778	0.0492458	0.923023	-0.0817573	0.999992	0.0224927	0.999994	-0.0128011	0.999959
Acadl	0.244304	0.881179	-0.222003	0.78672	-0.389595	0.607982	-2.62918	4.67529e-10	-0.132228	0.848166	-0.257191	0.760818	-0.118854	0.92465	0.157673	0.989467	-0.652984	0.239326	-0.485353	0.38181	0.0967735	0.974386	-0.337622	0.802625	0.141705	0.999983	-0.136619	0.999778	0.376998	0.701008	-0.025544	0.999992	-0.100516	0.999994	-0.0919958	0.999959
Acadm	0.22059	0.866179	-0.589184	0.203322	-0.187466	0.798792	-1.73688	2.39601e-06	-0.282134	0.525754	-0.131212	0.879433	-0.243106	0.74342	0.133573	0.989467	-0.535645	0.242163	-0.383003	0.405888	-0.188374	0.894422	-0.0363007	0.996107	0.108834	0.999983	-0.0926156	0.999778	0.507267	0.445156	-0.136564	0.999992	-0.258738	0.999994	-0.151584	0.999959
Acads	0.363647	0.812118	-0.784314	0.191206	0.488802	0.528395	-1.32829	0.0237744	0.415211	0.461957	0.153957	0.898479	0.0984156	0.952829	0.433031	0.869404	-0.764248	0.191823	-0.667724	0.242593	-0.0218505	0.992151	-0.24977	0.906882	-0.121672	0.999983	0.00455369	0.999778	-0.537622	0.575147	0.0907487	0.999992	-0.117745	0.999994	0.0586235	0.999959
Acadsb	-0.296609	0.594563	-0.374826	0.207836	-0.297219	0.406709	-0.804718	0.00240074	-0.883308	8.51311e-05	-0.311616	0.389665	-0.209745	0.643742	-0.121212	0.97976	0.18027	0.607349	-0.113027	0.757411	-0.209603	0.743619	0.504412	0.15819	0.256594	0.999983	-0.180486	0.999778	0.394073	0.305125	-0.0559924	0.999992	-0.0709495	0.999994	-0.0138761	0.999959
Acadvl	0.260341	0.832094	-0.445182	0.385501	-0.287218	0.661538	-1.52109	9.10375e-05	-0.153312	0.769709	-0.321711	0.606699	0.132395	0.882856	0.681584	0.444355	-1.2504	0.00244396	-0.624058	0.148613	0.104382	0.955406	-0.509145	0.47891	-0.0177451	0.999983	0.00392681	0.999778	-0.122296	0.927979	0.0319178	0.999992	-0.0833823	0.999994	-0.222649	0.999959
Acan	0.768326	0.865315	-0.932849	0.734084	0.596121	0.908079	-3.03249	0.0296436	-3.00154	0.124094	-0.131041	0.962764	-2.37287	0.48234	-0.710631	0.989467	-0.50376	0.888146	0.3977	0.906356	0.859002	0.929275	-0.0533722	0.996107	0.202235	0.999983	-0.156379	0.999778	0.227435	0.970305	-0.202798	0.999992	-0.259166	0.999994	0.0542181	0.999959
Acap1	0.37703	0.808034	1.21233	0.0273993	0.320892	0.725741	-0.399387	0.672762	1.73624	0.000218705	0.0845455	0.934232	-0.868192	0.239888	-0.728902	0.610316	0.800078	0.188472	1.38113	0.0136614	-0.0481766	0.992151	1.05593	0.149605	-0.665674	0.999983	0.260355	0.999778	-1.51835	0.139858	-0.343707	0.999992	-0.513073	0.999994	1.25075	0.999959
Acap2	-0.549095	0.271227	-0.314134	0.416291	0.00713029	0.988707	-0.24288	0.632296	-1.03565	7.91302e-05	-0.0890217	0.897204	-0.274011	0.573146	-0.13099	0.985171	0.159903	0.701084	-0.392706	0.237797	-0.255789	0.724557	0.0166733	0.996107	0.213507	0.999983	-0.204161	0.999778	0.564814	0.171743	0.0893042	0.999992	0.0202557	0.999994	0.230445	0.999959
Acap3	0.153422	0.903086	-0.134603	0.827039	0.285042	0.59219	0.260519	0.663515	-0.134827	0.7565	0.400907	0.410291	-0.0376685	0.993164	-0.0434488	0.989467	0.531805	0.214968	0.537943	0.204029	-0.122465	0.930565	0.421765	0.544344	-0.0923467	0.999983	-0.0358687	0.999778	-0.177962	0.837742	-0.0845175	0.999992	0.140247	0.999994	0.155384	0.999959
Acat1	0.10386	0.925686	-0.266496	0.442031	-0.271938	0.478205	-0.651392	0.0300248	-0.352473	0.177323	0.0194664	0.968104	0.100368	0.856841	0.165809	0.940656	-0.458682	0.11464	-0.329648	0.259998	-0.169633	0.826396	-0.4385	0.264229	0.0838673	0.999983	0.0881499	0.999778	0.242519	0.636528	-0.0892464	0.999992	0.0576383	0.999994	-0.0668274	0.999959
Acbd3	-0.183766	0.724631	0.31822	0.16953	-0.127546	0.714831	-0.0858526	0.857427	-0.104719	0.665878	-0.223242	0.444577	-0.0135153	0.999876	-0.142994	0.918172	0.259268	0.290905	0.129188	0.631304	0.114046	0.865056	0.133706	0.833582	0.0297873	0.999983	-0.0748711	0.999778	0.342162	0.252407	0.037024	0.999992	0.032794	0.999994	-0.00101241	0.999959
Acbd4	0.071889	0.971679	-0.502466	0.134058	0.588536	0.111899	0.0454198	0.974936	0.0423384	0.93298	0.39617	0.34901	-0.0615249	0.94721	0.390986	0.638988	-0.453836	0.189896	-0.194686	0.612073	-0.29519	0.67096	-0.323385	0.596689	-0.15683	0.999983	0.0766482	0.999778	-0.189975	0.783346	-0.0578677	0.999992	0.000546953	0.999994	0.0967393	0.999959
Acbd5	-0.335109	0.698641	-0.286911	0.562666	-0.350413	0.494212	-0.370976	0.49009	-1.12542	0.000305816	-0.344595	0.502639	-0.53274	0.273006	0.115848	0.989467	-0.472611	0.245458	-0.723207	0.0506866	0.0571217	0.985861	-0.308396	0.708107	0.184624	0.999983	-0.227862	0.999778	0.505491	0.350106	0.0495168	0.999992	-0.310294	0.999994	-0.0351113	0.999959
Acbd6	-0.025706	0.973282	-0.155844	0.647681	-0.245026	0.453916	-0.146166	0.741866	0.173859	0.482039	0.0803238	0.86577	0.169326	0.694107	0.553569	0.145859	-0.247061	0.398498	-0.339177	0.197665	-0.0876154	0.922162	-0.253654	0.596689	-0.140929	0.999983	-0.0260026	0.999778	0.214648	0.616633	-0.0345145	0.999992	-0.0294599	0.999994	0.145632	0.999959
Acbd7	-1.31328	0.855397	2.29196	0.341689	0.168851	NA	-1.97193	0.568761	-1.56556	0.455308	2.45987	0.364996	-0.00839079	NA	1.21296	0.965739	-0.50376	NA	-0.564095	NA	-0.102793	NA	-0.0533722	NA	0.388945	0.999983	1.01978	0.999778	0.662052	0.68252	0.11579	0.999992	0.30251	0.999994	0.195153	0.999959
Accs	0.205142	0.866316	-0.179384	0.770063	0.0589945	0.955106	-0.206699	0.790498	0.202499	0.638689	0.240404	0.69198	-0.0608077	0.966006	-0.048899	0.989467	-0.585037	0.171188	-0.459068	0.271791	-0.13278	0.926558	-0.178971	0.908555	0.256806	0.999983	0.105699	0.999778	-0.394093	0.588493	-0.164408	0.999992	0.250077	0.999994	0.190572	0.999959
Acd	0.27088	0.571023	0.0715399	0.873402	0.479713	0.0782846	0.352203	0.233531	0.49971	0.0134978	0.33518	0.284082	-0.111697	0.825074	0.299868	0.640078	-0.00938336	0.978903	-0.00881858	0.977946	-0.00581248	0.994474	0.0884793	0.927477	-0.167552	0.999983	-0.0718503	0.999778	-0.0280754	0.996583	0.0580005	0.999992	0.0469519	0.999994	0.169382	0.999959
Ace2	-0.158394	0.971741	-0.342046	0.768632	-0.36556	0.768406	-0.362129	0.815726	-1.53361	0.0205846	0.366386	0.767508	0.120479	0.958478	-1.77353	0.071796	0.47753	0.590459	-0.248696	0.793684	-0.653791	0.676746	0.954487	0.391299	-0.159975	0.999983	-0.599323	0.999778	-0.612151	0.669085	0.403391	0.999992	0.185371	0.999994	-0.0205008	0.999959
Acer1	-1.31575	0.847849	-0.564008	0.90176	-0.246097	0.960682	-0.127338	0.99019	2.16805	0.305231	-1.38464	0.701732	-0.610985	0.253741	-0.36891	0.819111	-0.262604	0.616812	0.245037	0.621286	0.0937878	0.961597	0.109671	0.955845	-0.0246063	0.999983	-0.164044	0.999778	0.05864	0.996583	-0.0480762	0.999992	1.26685	0.999994	-0.289998	0.999959
Acer2	-0.887599	0.385416	-1.05949	0.0787373	-0.0148689	0.987589	0.101533	0.962004	-1.74999	0.000398498	0.0682012	0.947696	0.345681	0.748158	0.517741	0.839394	-0.964803	0.131326	-0.205645	0.799961	-0.350303	0.839939	-0.682891	0.522016	0.524787	0.999983	0.207371	0.999778	-0.0308632	0.996583	0.707955	0.999992	0.729299	0.999994	0.553804	0.999959
Acer3	-0.297521	0.661687	0.293771	0.440122	-0.227046	0.622669	0.0431918	0.976271	-0.421421	0.136198	-0.228028	0.615447	0.00351064	0.999876	-0.228909	0.885417	-0.171253	0.66388	-0.300549	0.372051	0.378349	0.493096	-0.0360414	0.996107	0.160671	0.999983	-0.0554506	0.999778	-0.256178	0.657238	0.0601709	0.999992	-0.386289	0.999994	-0.273362	0.999959
Ache	-2.08428	0.63768	0.00510914	0.997414	1.15455	0.553765	1.60098	0.53532	-0.156279	0.932138	1.38075	0.448864	0.0631499	0.996582	-0.993342	0.571084	1.07215	0.170723	0.759868	0.33473	0.167065	0.961516	0.29131	0.919915	-0.0773659	0.999983	0.152013	0.999778	0.26538	0.895387	0.0890914	0.999992	0.158817	0.999994	0.122539	0.999959
Acin1	0.00402732	0.995995	0.0861964	0.838528	0.37397	0.200448	0.349751	0.253172	-0.00490074	0.98691	-0.194305	0.577232	0.513033	0.0761226	-0.0713195	0.989467	0.236146	0.403234	0.928082	5.60112e-05	0.0878472	0.921084	-0.165632	0.793235	-0.101321	0.999983	0.05569	0.999778	0.425908	0.182609	0.157402	0.999992	0.0562514	0.999994	0.0446791	0.999959
Ackr1	0.435738	0.539946	-0.254261	0.610924	-0.327786	0.516745	0.214049	0.749283	0.46644	0.165675	0.805577	0.0865841	0.406205	0.595492	-0.150654	0.989467	1.34047	0.0030432	0.733096	0.149905	-0.961791	0.0624671	0.503453	0.505271	0.0909894	0.999983	-0.221385	0.999778	-0.0585871	0.977878	-0.133786	0.999992	-0.0743082	0.999994	-0.222689	0.999959
Ackr2	1.53042	0.356285	0.439364	0.76946	1.38061	0.327421	0.232113	0.927281	1.66391	0.0382003	0.95367	0.506206	-0.00633076	0.999876	0.330489	0.989467	1.10596	0.307074	0.0682536	0.952854	0.618663	0.792608	0.179657	0.976543	0.448646	0.999983	0.149887	0.999778	0.774097	0.654301	0.450522	0.999992	0.614862	0.999994	0.393847	0.999959
Ackr3	-0.0602839	0.971741	-0.664796	0.140936	-0.0356799	0.965087	0.0968317	0.936078	-1.02465	0.00505821	0.220499	0.751013	-0.256349	0.747877	0.216576	0.965898	0.392896	0.44477	-0.272147	0.613103	-0.420935	0.65346	0.37836	0.692608	0.126468	0.999983	0.194492	0.999778	0.219606	0.8321	0.26007	0.999992	0.140919	0.999994	0.34902	0.999959
Ackr4	-0.388627	0.703216	-0.943071	0.0261695	0.236894	0.740309	0.329109	0.640172	-1.01117	0.00703975	0.83207	0.154006	0.0869993	0.952018	0.219348	0.969121	0.258008	0.661131	-0.0757597	0.903037	0.28383	0.82317	-0.23171	0.888436	0.149958	0.999983	0.0269412	0.999778	0.976374	0.114995	0.510619	0.999992	-0.117864	0.999994	0.499792	0.999959
Acly	-0.1812	0.750774	0.037761	0.926561	0.0825603	0.845819	-0.0110039	0.99019	-0.246246	0.255828	-0.395795	0.192613	0.336858	0.268402	-0.0814476	0.989467	0.618112	0.00677289	0.817264	0.000207021	0.128133	0.850284	0.227554	0.610473	0.0173467	0.999983	0.00466935	0.999778	0.0125748	0.996583	0.0117557	0.999992	0.00158958	0.999994	0.0929653	0.999959
Acmsd	0.567783	0.715632	-1.29611	0.0522877	-0.394624	0.702161	-0.428643	0.705607	-1.03649	0.10179	-0.966473	0.271354	-0.945283	0.434484	1.31089	0.383775	0.88128	0.317791	-0.0528844	NA	-1.15817	0.284423	-0.311164	0.917529	-0.472454	0.999983	-0.0829618	0.999778	0.818469	0.547888	-0.484164	0.999992	0.427899	0.999994	0.431695	0.999959
Aco1	-0.281213	0.746734	0.165322	0.759201	0.444295	0.309809	-0.177933	0.800109	-0.258344	0.468654	-0.260781	0.607726	0.549548	0.207864	-0.0522138	0.989467	-0.122963	0.803187	0.223828	0.579177	-0.241243	0.782838	-0.723587	0.0848862	0.0196398	0.999983	-0.0100386	0.999778	0.21193	0.774743	-0.134894	0.999992	0.0111423	0.999994	-0.0442459	0.999959
Aco2	0.165126	0.898395	-0.371278	0.42468	0.278891	0.62044	-0.988955	0.0111395	-0.168034	0.701399	-0.0935743	0.915928	0.0341957	0.993492	0.107751	0.989467	-0.448083	0.279873	-0.0349244	0.942498	-0.0857389	0.962372	-0.373751	0.603906	-0.0569585	0.999983	-0.0690013	0.999778	0.245663	0.749571	-0.0800879	0.999992	-0.0622248	0.999994	-0.0479663	0.999959
Acod1	4.38526	4.92972e-07	2.9698	0.00114017	-1.00337	0.479198	4.10654	3.33372e-06	3.9768	1.1763e-06	-0.172063	0.930878	-0.762629	0.801954	2.71411	0.59383	-0.267227	0.903316	3.76215	0.0537243	-1.19208	0.722243	1.39613	0.694095	3.43922	0.999983	-1.59701	0.999778	-0.90307	0.896287	3.44976	0.999992	1.26342	0.999994	2.13085	0.999959
Acot11	-0.0569412	0.971741	0.433913	0.404398	0.272657	0.688224	-0.841171	0.0863668	0.497967	0.217891	-0.125276	0.891373	0.161662	0.84504	0.358252	0.849548	-0.934848	0.0287317	-0.38757	0.405352	0.287935	0.792836	0.0520652	0.996107	0.201794	0.999983	-0.181451	0.999778	-0.108231	0.942098	-0.00997206	0.999992	-0.16928	0.999994	0.112888	0.999959
Acot12	0.649128	0.902885	1.14231	0.67098	-3.10083	0.235501	-4.3743	0.0459191	0.956056	0.555332	-2.84641	0.296748	0.224678	0.92766	0.141169	0.989467	-0.173879	0.896339	-1.02337	0.336721	-0.569226	0.842933	-0.89476	0.665299	0.121146	0.999983	-0.20061	0.999778	-0.826928	0.689306	-0.41839	0.999992	0.706674	0.999994	0.116725	0.999959
Acot13	0.142752	0.948887	-0.553585	0.302638	-0.518521	0.387888	-1.25788	0.00742507	-0.0234624	0.96641	-0.0660333	0.937624	-0.900408	0.0902332	0.450395	0.764764	-0.00675632	0.991955	-1.02026	0.0201524	-0.55869	0.488862	-0.327107	0.76798	0.0322145	0.999983	0.117585	0.999778	0.706017	0.248811	0.0621313	0.999992	-0.155286	0.999994	-0.460046	0.999959
Acot4	0.179595	0.973426	-0.0747581	0.97874	-0.515526	NA	-2.80823	0.126602	0.648642	0.736266	-2.95531	0.27297	3.77517	NA	1.36136	0.845101	1.10456	NA	-2.43191	NA	0.336026	NA	0.425975	NA	-0.796144	0.999983	-0.181606	0.999778	1.47655	0.610642	-0.168868	0.999992	-0.69085	0.999994	2.70018	0.999959
Acot7	0.130996	0.937853	1.04957	0.00306341	0.55668	0.23742	0.854522	0.0457713	1.23636	0.000103698	0.690841	0.183281	-0.26574	0.673233	0.0586678	0.989467	-0.626045	0.121031	-0.285448	0.517231	0.0709262	0.976709	0.40299	0.567864	-0.166902	0.999983	0.116566	0.999778	-0.454429	0.450557	-0.0768292	0.999992	0.0514234	0.999994	0.0659681	0.999959
Acot8	0.0726808	0.971741	-0.349237	0.473004	0.278392	0.635783	0.403073	0.487789	0.614627	0.0753639	0.118596	0.886097	-0.174335	0.821111	-0.0950569	0.989467	-0.75399	0.0630524	-0.502462	0.217712	-0.00643304	0.995311	-0.0880496	0.969347	-0.0370097	0.999983	0.139745	0.999778	-0.123057	0.918846	0.128499	0.999992	-0.101462	0.999994	0.0331008	0.999959
Acot9	0.233928	0.666555	0.0190504	0.964024	-0.54643	0.0507504	-0.668324	0.00683639	0.132058	0.622377	-0.443712	0.17677	0.136527	0.755754	0.0516537	0.989467	-0.429174	0.0911313	-0.175811	0.534506	0.0933819	0.917685	-0.0111916	0.996107	-0.0173493	0.999983	-0.120286	0.999778	0.134953	0.810825	0.04715	0.999992	0.0264206	0.999994	-0.0220889	0.999959
Acox1	-0.0478135	0.971741	-0.196608	0.602709	0.0024558	0.995007	-0.319087	0.399108	-0.687689	0.0036138	-0.102447	0.841761	0.166508	0.727069	-0.0492393	0.989467	-0.682527	0.0117404	-0.396749	0.156946	-0.251695	0.676746	-0.264534	0.623283	0.0584376	0.999983	-0.0400165	0.999778	-0.0650808	0.948638	-0.0799077	0.999992	0.0172312	0.999994	0.0281794	0.999959
Acox2	0.612464	0.823012	-1.6312	0.0905873	-1.47562	0.242365	-5.38712	1.5191e-11	0.0339744	0.976525	-0.985889	0.456051	0.10531	0.979916	0.209659	0.989467	-0.449851	0.682741	-0.10756	0.921756	-0.0932275	0.992151	-1.21984	0.339617	0.0420451	0.999983	0.397948	0.999778	0.302217	0.902009	0.196087	0.999992	-0.202106	0.999994	0.268608	0.999959
Acox3	-0.027855	0.971741	-0.370562	0.0339123	0.096185	0.747221	-0.227899	0.333273	-0.474826	0.00162047	-0.169416	0.491832	-0.0139353	0.999876	0.0334172	0.989467	0.0932399	0.724585	0.516646	0.00915497	-0.0753135	0.912926	-0.112589	0.846238	0.0435916	0.999983	0.00993862	0.999778	-0.00579609	0.996583	-0.0938969	0.999992	0.0275295	0.999994	-0.103941	0.999959
Acoxl	-0.0091672	0.996841	-1.29217	0.0675385	-0.718346	0.440918	-0.167735	0.930626	-2.1995	0.000181095	-0.857171	0.355113	1.15432	0.543373	-0.309471	0.989467	0.251644	0.875655	-1.36957	0.208699	-0.0187101	0.994821	-0.831631	0.667237	-0.792263	0.999983	-0.892623	0.999778	1.53496	0.318195	-0.924506	0.999992	-1.34615	0.999994	2.34187	0.999959
Acp1	-0.116612	0.839997	0.113788	0.696391	-0.258438	0.30334	-0.384065	0.0950112	-0.189476	0.3292	0.138468	0.646813	-0.530713	0.0188842	-0.0621209	0.989467	0.00863046	0.975811	-0.57598	0.00348016	-0.256246	0.466827	-0.102456	0.886428	0.188813	0.999983	-0.185829	0.999778	0.239232	0.440573	0.0314987	0.999992	-0.131202	0.999994	-0.119383	0.999959
Acp2	0.235073	0.516417	-0.129723	0.617581	-0.0970639	0.757175	0.223078	0.383053	-0.23199	0.185883	0.094815	0.760925	0.0217198	0.986341	-0.340304	0.361221	-0.668791	0.000463195	-0.0729673	0.778925	0.026381	0.990588	0.231396	0.486205	-0.00643459	0.999983	0.0438255	0.999778	-0.0761143	0.885838	-0.0921804	0.999992	0.061768	0.999994	0.0334414	0.999959
Acp3	0.533574	0.761671	0.0412486	0.972523	0.0981992	0.960258	1.60551	0.0287712	0.27588	0.733533	-0.669476	0.481935	-0.190772	0.898284	0.0499436	0.989467	-0.0754182	0.934286	0.208699	0.82066	0.358877	0.860963	0.0267613	0.996107	0.11116	0.999983	-0.318479	0.999778	0.194936	0.942098	1.23264	0.999992	0.447619	0.999994	1.30962	0.999959
Acp4	0.488885	NA	0.596644	NA	-0.0454073	NA	-0.0687764	NA	1.28906	NA	0.921625	NA	-0.970186	NA	-0.761424	0.989467	0.458035	NA	-0.585876	NA	-1.526	NA	-0.700114	NA	-0.0246063	0.999983	-1.61995	0.999778	-0.90319	NA	-0.0480761	0.999992	-0.174343	NA	-0.289998	0.999959
Acp5	0.357926	0.743337	0.175899	0.805459	0.602793	0.261105	0.501304	0.403599	0.108675	0.854229	0.827342	0.157911	-0.0416321	0.991151	-0.433458	0.765143	-0.13088	0.83745	0.00972377	0.986083	-0.130914	0.93668	0.175316	0.918079	-0.361164	0.999983	0.70365	0.999778	-0.880859	0.24633	0.115083	0.999992	-0.173656	0.999994	0.253589	0.999959
Acp6	0.422725	0.652904	0.290102	0.623739	-0.079995	0.936722	-0.215537	0.80539	1.03896	0.00413856	-0.156957	0.8435	0.162199	0.841627	-0.167113	0.989467	-0.733768	0.091796	-0.358968	0.438152	-0.262496	0.8172	-0.607873	0.329525	0.12944	0.999983	0.403515	0.999778	0.205252	0.862593	0.444658	0.999992	0.125491	0.999994	0.220936	0.999959
Acp7	-3.34111	NA	1.09514	0.59645	2.4231	NA	-3.02456	0.263386	-0.415378	0.851886	-0.844047	NA	-1.82775	NA	-0.0613001	0.989494	1.29907	NA	-0.730018	NA	-0.104943	NA	0.000360969	NA	-0.346286	0.999983	0.837252	0.999778	-2.13738	0.571831	0.654187	0.999992	-3.09415	0.999994	0.712657	0.999959
Acr	0.805088	0.801726	-0.234642	0.90944	-1.27067	NA	0.700144	0.739195	-0.015046	0.98966	0.316682	0.902917	0.872325	NA	1.21296	0.965739	-0.50376	NA	-0.564095	NA	-2.96333	NA	-1.01517	NA	-0.472164	0.999983	-0.839001	0.999778	1.055	0.487808	1.55763	0.999992	-0.0913426	0.999994	0.269391	0.999959
Acsbg1	-1.19349	NA	-0.541367	NA	0.525818	NA	-0.154185	NA	-1.06092	NA	0.796951	NA	-1.0649	NA	3.98712	NA	-2.95065	NA	-1.12273	NA	5.55336	NA	3.99379	NA	-0.0685552	NA	0.0113455	NA	-0.0635022	NA	-0.0678351	NA	-0.102535	NA	-0.0415365	NA
Acsf2	0.185357	0.827657	-0.0698294	0.90176	0.582592	0.0911372	-0.100368	0.886648	0.379665	0.169026	0.0229213	0.965106	0.215715	0.650893	-0.0286369	0.989467	-0.803285	0.00566846	-0.265239	0.415319	0.0906289	0.935001	0.00922678	0.996107	-0.0339722	0.999983	-0.0505142	0.999778	-0.0772346	0.940148	0.0446814	0.999992	-0.0892849	0.999994	0.0310745	0.999959
Acsf3	0.192437	0.871628	-0.22919	0.672017	0.0721831	0.935701	-0.399328	0.457648	0.0589811	0.92532	-0.0270543	0.967619	0.11784	0.878577	-0.0811152	0.989467	-0.945979	0.00900607	-0.363535	0.36249	-0.259894	0.77916	-0.719472	0.123951	-0.0761785	0.999983	0.133525	0.999778	-0.0676583	0.971518	-0.00168782	0.999992	-0.0858444	0.999994	0.0500948	0.999959
Acsl1	0.0352567	0.983476	-0.521831	0.479633	0.0659621	0.960682	-2.17282	3.69494e-05	-0.586393	0.302382	-0.628416	0.425578	0.281627	0.801954	-0.272836	0.972554	0.928086	0.132599	0.179356	0.822516	-0.929678	0.288404	-0.0369313	0.996107	-0.0220588	0.999983	-0.00858909	0.999778	0.106968	0.969981	-0.0125066	0.999992	-0.0284622	0.999994	-0.119873	0.999959
Acsl3	-0.462129	0.271227	-0.361995	0.218782	-0.349557	0.295747	-0.316836	0.379367	-1.31311	7.3711e-10	-0.337363	0.33962	-0.232145	0.609116	0.421796	0.491825	0.445591	0.144761	0.286189	0.366435	0.102726	0.921084	0.00388897	0.997303	0.0372508	0.999983	-0.115662	0.999778	0.57256	0.0699502	-0.003445	0.999992	0.111579	0.999994	0.00695601	0.999959
Acsl4	-0.535688	0.418867	0.502891	0.219526	-0.220078	0.712721	0.0647803	0.960983	-0.054043	0.93287	-0.468361	0.340538	0.26325	0.668263	0.154037	0.985455	0.320166	0.465015	-0.23679	0.599522	0.331971	0.684503	-0.0204006	0.996107	0.228428	0.999983	-0.229044	0.999778	0.375476	0.547568	-0.0360534	0.999992	0.0898698	0.999994	-0.0108292	0.999959
Acsl5	0.130218	0.959406	0.0158546	0.98456	-0.27994	0.706617	0.228607	0.81315	0.324715	0.50255	-0.047437	0.953211	0.260844	0.751709	-0.240808	0.963877	-1.01672	0.0289787	-0.760422	0.100828	-0.563043	0.505828	-0.756929	0.23522	-0.0310165	0.999983	0.122527	0.999778	-0.0679393	0.985228	-0.0710596	0.999992	0.130582	0.999994	0.00941865	0.999959
Acsl6	-1.4843	0.523018	-2.91853	0.173548	1.6053	0.614335	-0.947261	0.638475	-2.11712	0.267393	1.46141	0.597894	1.14307	0.448363	1.43613	0.39547	3.34645	0.0637512	-0.237818	0.894042	-1.84094	0.388628	0.510465	0.920284	0.0738376	0.999983	-0.145479	0.999778	0.273938	0.056812	0.0182422	0.999992	-0.100339	0.999994	0.0977848	0.999959
Acsm1	0.415715	NA	-1.03809	0.634084	-0.190148	NA	-1.11351	0.651898	0.00256183	0.998678	-1.6287	NA	0.700364	NA	1.21296	0.977373	-1.46555	NA	-0.564095	NA	-0.102793	NA	-0.0533722	NA	0.513498	0.999983	1.40043	0.999778	-3.67132	0.235242	-0.0480761	0.999992	-0.174343	0.999994	2.10055	0.999959
Acsm3	-0.173159	0.962218	-0.78051	0.297484	0.31811	0.770997	-1.13104	0.139518	-1.32389	0.0200645	0.710247	0.41766	-0.911346	0.322195	-0.315759	0.973599	0.0838947	0.929404	-1.47079	0.0365106	-0.425856	0.822823	0.539015	0.733439	0.868914	0.999983	0.274952	0.999778	-1.77903	0.66891	2.39716	0.999992	-1.59677	0.999994	-2.1313	0.999959
Acsm4	1.23607	NA	-0.934447	NA	-1.48354	NA	-0.675906	NA	-2.68262	NA	-1.06038	NA	0.00186882	NA	0.251161	NA	-0.503755	NA	-0.564089	NA	-0.102792	NA	-0.0533717	NA	0.93718	NA	-1.69673	0.999778	0.0589934	NA	1.29658	0.999992	-0.17434	NA	-0.289995	0.999959
Acsm5	-0.310042	0.794946	-1.33677	0.000848035	0.371843	0.562514	-0.778263	0.134484	-1.65889	5.79704e-06	-0.362926	0.567156	0.494726	0.40948	-0.244963	0.951089	0.132799	0.837171	0.237965	0.650091	-0.282669	0.807073	-0.428174	0.612229	0.0200933	0.999983	-0.14899	0.999778	0.447132	0.543154	0.117485	0.999992	0.0497747	0.999994	0.0152603	0.999959
Acss1	-0.0654695	0.971741	-0.655992	0.0729112	-0.0967512	0.893798	0.0591096	0.96451	-0.978553	0.00129858	0.190269	0.742052	-0.0359179	0.989512	0.0140682	0.989787	-0.996416	0.00428372	0.372625	0.331833	0.300686	0.710053	0.275303	0.738507	0.0652114	0.999983	-0.00490436	0.999778	-0.375668	0.52655	0.138899	0.999992	0.0617702	0.999994	-0.109112	0.999959
Acss2	0.013134	0.989839	-0.879127	0.0101766	-0.310752	0.545572	-0.391426	0.43906	-0.721667	0.0229474	-1.05849	0.00861292	-0.120618	0.870019	0.15829	0.982211	-0.128295	0.804129	0.124893	0.795832	0.346526	0.654197	0.29703	0.709379	-0.0318474	0.999983	-0.0734279	0.999778	-0.0779013	0.956874	-0.140692	0.999992	-0.0226752	0.999994	0.0663782	0.999959
Acss3	-0.707324	0.679659	-0.283908	0.826422	0.128522	0.945758	-0.789216	0.462518	-0.489275	0.542908	-0.0929666	0.944476	1.51844	0.205833	1.72636	0.247069	1.71639	0.0855035	-0.886318	0.357476	-1.90396	0.090886	0.907226	0.635892	0.359676	0.999983	-0.0509333	0.999778	0.296406	0.892166	0.117482	0.999992	-0.421691	0.999994	-0.244517	0.999959
Acta1	-0.490169	0.939121	-2.16251	0.169317	1.86631	0.323402	0.934285	0.719907	0.389091	0.841645	0.471847	0.870867	-1.18723	0.597539	-1.1283	0.873093	0.476378	0.821356	6.10014	3.01e-06	-0.868914	0.831906	0.0604446	0.996107	0.00995581	0.999983	0.113077	0.999778	-5.63619	5.48086e-05	2.64898	0.999992	0.0438944	0.999994	2.14586	0.999959
Acta2	0.175408	0.86588	0.0401999	0.945274	0.277313	0.566005	-0.0226574	0.99019	0.419702	0.180085	-0.21864	0.668298	-0.0553948	0.959902	0.562269	0.402169	0.264152	0.506054	-0.30812	0.400081	-1.10817	0.00133652	-0.296651	0.67166	0.298618	0.999983	-0.438301	0.999778	0.253418	0.7044	0.078622	0.999992	0.156517	0.999994	0.0471477	0.999959
Actb	0.283098	0.663922	0.456394	0.143352	0.213183	0.62696	0.0979703	0.887511	0.711152	0.00480897	0.146585	0.76287	-0.0371961	0.978424	-0.348444	0.663924	-0.194972	0.592571	-0.338491	0.272928	-0.239742	0.722243	0.212223	0.767171	0.0130381	0.999983	-0.0785201	0.999778	-0.178433	0.77586	-0.0380658	0.999992	0.00603694	0.999994	-0.0284616	0.999959
Actbl2	NA	NA	NA	NA	NA	NA	NA	NA	NA	NA	NA	NA	NA	NA	NA	NA	NA	NA	NA	NA	NA	NA	NA	NA	NA	NA	NA	NA	NA	NA	NA	NA	NA	NA	NA	NA
Actc1	0.41155	0.844275	-1.43645	0.0420442	0.51109	0.632703	0.422656	0.7476	-0.325839	0.690729	-0.265107	0.84072	-1.27688	0.244307	-1.31315	0.416255	1.07249	0.222237	-0.0435937	0.967265	-1.16345	0.404884	0.107329	0.995485	-1.05899	0.999983	-1.42852	0.999778	-1.11633	0.46369	0.0642959	0.999992	0.30662	0.999994	0.263758	0.999959
Actg1	0.0967351	0.955876	0.142565	0.786605	0.199292	0.702749	-0.176291	0.785631	0.469768	0.118274	0.361699	0.413649	-0.0981448	0.889017	-0.131678	0.988823	-0.0528817	0.90381	0.139123	0.7379	-0.280019	0.705161	0.377826	0.502176	-0.0102519	0.999983	0.00212622	0.999778	-0.417808	0.39917	-0.00166702	0.999992	0.0967526	0.999994	0.0433405	0.999959
Actg2	0.437495	0.759958	-0.166312	0.877606	0.297755	0.748264	-0.157235	0.909542	0.791906	0.120496	-0.481816	0.541332	-0.341738	0.720435	0.212223	0.989467	0.211978	0.784931	-0.907566	0.101101	-1.89792	0.000788651	-0.397203	0.771335	0.709578	0.999983	-1.54555	0.999778	0.286659	0.906863	0.361709	0.999992	-0.309441	0.999994	-0.0579242	0.999959
Actl10	1.66041	NA	0.957689	NA	-1.18917	NA	-1.6962	NA	2.19993	NA	-0.0821991	NA	-0.00839072	NA	-1.71856	NA	-2.48657	NA	-1.52588	NA	-1.93671	NA	0.908416	NA	-0.0246061	NA	-0.164042	0.999778	2.19562	NA	0.913712	0.999992	-1.54083	NA	-2.19762	0.999959
Actl6a	-0.0726167	0.897338	0.18423	0.343389	-0.451942	0.0135777	-0.158153	0.515553	0.190092	0.22032	-0.0332621	0.930745	0.138744	0.605861	-0.0170871	0.989467	-0.0101085	0.966375	0.0934664	0.655819	0.347	0.108792	-0.116962	0.785977	0.0436787	0.999983	-0.0521739	0.999778	0.146095	0.679906	0.0325785	0.999992	-0.0211864	0.999994	-0.0171965	0.999959
Actl6b	-2.72955	0.454305	1.87841	0.445574	-0.252247	0.953318	0.750005	0.88007	0.309329	0.93298	-0.422847	0.930745	1.58548	0.378596	-2.21081	0.640243	1.97162	0.329804	-0.564095	0.855774	-0.953435	0.703522	-0.39275	0.946324	-0.0351112	0.999983	-0.0135798	0.999778	-0.00640783	0.996583	-0.151154	0.999992	0.0453977	0.999994	0.0283312	0.999959
Actl7a	-0.356626	NA	-0.563968	NA	-0.246079	NA	-0.127328	NA	0.309307	NA	-0.422816	NA	-3.20782	NA	0.251146	NA	1.20864	NA	0.591406	NA	-0.102786	NA	2.62537	NA	-0.0246045	NA	-0.164027	0.999778	0.0597404	NA	1.66528	0.999992	-0.174324	NA	-0.289977	0.999959
Actl7b	-0.356626	NA	-1.52569	NA	-0.246079	NA	-0.127328	NA	-0.652419	NA	-0.422816	NA	-0.00839018	NA	0.251146	NA	-2.28559	NA	-0.564054	NA	-0.102786	NA	-0.0533684	NA	-0.0246045	NA	-0.164027	0.999778	0.0592982	NA	0.913653	0.999992	-0.461413	NA	1.54555	0.999959
Actl9	NA	NA	NA	NA	NA	NA	NA	NA	NA	NA	NA	NA	NA	NA	NA	NA	NA	NA	NA	NA	NA	NA	NA	NA	NA	NA	NA	NA	NA	NA	NA	NA	NA	NA	NA	NA
Actn1	-0.115883	0.894056	0.483674	0.0644126	0.525345	0.0798812	0.45134	0.140668	0.909924	1.8935e-05	-0.075259	0.891672	0.518136	0.0943921	0.246662	0.796878	0.282728	0.332186	0.650477	0.00994443	-0.19064	0.763945	-0.481301	0.149973	0.156993	0.999983	-0.103018	0.999778	0.0759367	0.925978	0.107143	0.999992	0.512654	0.999994	0.252766	0.999959
Actn2	0.573908	0.755174	-1.83838	0.00700485	1.31976	0.123929	1.08313	0.232757	-0.797788	0.249837	-0.846882	0.384463	0.22073	0.90261	0.308419	0.987736	0.199996	0.864977	-0.999856	0.22345	-1.30351	0.218479	-1.71717	0.0641313	0.21648	0.999983	-0.0693517	0.999778	-0.187853	0.939945	-0.0522762	0.999992	0.370731	0.999994	0.108177	0.999959
Actn3	-0.0813134	0.983476	0.776819	0.688087	1.60946	0.359723	0.538785	0.857026	0.909017	0.502947	-0.0549168	0.980849	0.705433	0.825889	-0.526076	0.989467	0.291676	0.888057	0.150927	NA	-0.192571	0.992117	-0.385433	0.965553	0.618688	0.999983	0.821875	0.999778	-8.879	3.17185e-06	3.05897	0.83889	0.8233	0.999994	2.95289	0.999959
Actn4	-0.208799	0.808014	0.143715	0.772232	0.512578	0.167912	0.56514	0.124593	0.516809	0.0665063	-0.228736	0.622275	0.547413	0.154306	-0.29511	0.801508	-0.313592	0.376102	0.278071	0.417587	-0.0469754	0.987073	-0.163826	0.874695	0.0100408	0.999983	-0.01437	0.999778	0.0898039	0.928301	0.0836106	0.999992	0.153379	0.999994	0.131001	0.999959
Actr10	0.0866795	0.897338	0.191195	0.431163	-0.458022	0.0417938	-0.213809	0.439405	-0.0744158	0.755127	0.142129	0.627724	-0.371847	0.125251	-0.214344	0.729275	-0.0698867	0.808325	-0.438935	0.0250749	-0.127598	0.809983	-0.0124169	0.996107	0.0549754	0.999983	-0.0139795	0.999778	-0.270992	0.348471	-0.0367109	0.999992	-0.0528725	0.999994	-0.0843786	0.999959
Actr1a	0.0599536	0.920814	-0.210266	0.229214	0.0885969	0.730474	0.168634	0.447431	-0.0160166	0.942605	0.16197	0.449623	0.146247	0.538748	-0.00790259	0.989467	-0.325892	0.0443738	-0.0672802	0.740003	-0.00421335	0.994283	0.0246154	0.990793	-0.103559	0.999983	0.0162317	0.999778	-0.162942	0.532424	-0.027765	0.999992	0.0639548	0.999994	0.0697197	0.999959
Actr1b	-0.092786	0.866316	-0.456336	0.00593833	0.172665	0.479186	0.180147	0.48093	-0.229156	0.162674	0.106048	0.701866	0.0155254	0.998698	0.0772495	0.984793	-0.00495572	0.984869	0.11693	0.59613	-0.127129	0.784158	-0.12084	0.807575	-0.125414	0.999983	0.0442314	0.999778	-0.185688	0.518301	0.0115957	0.999992	0.14561	0.999994	-0.00220872	0.999959
Actr2	-0.374178	0.48825	0.444115	0.144348	-0.301936	0.429697	-0.161906	0.764877	-0.358259	0.180846	-0.352355	0.354555	-0.254798	0.554728	-0.277524	0.785289	0.247806	0.455942	-0.0543282	0.886838	0.262692	0.675177	0.0634713	0.969896	0.157183	0.999983	-0.27927	0.999778	0.450767	0.253392	0.00030816	0.999992	-0.0358664	0.999994	-0.00430642	0.999959
Actr3	0.191551	0.532362	0.768349	2.27e-09	-0.429627	0.0134305	-0.0252948	0.9667	0.537254	3.38839e-05	-0.0519197	0.865633	-0.259718	0.184514	-0.175968	0.701141	-0.0655451	0.760281	-0.172163	0.30222	0.170851	0.57868	0.31482	0.107126	0.115327	0.999983	-0.193057	0.999778	0.0494192	0.914354	-0.0126594	0.999992	0.0765527	0.999994	0.0625456	0.999959
Actr3b	-0.0474015	0.973282	0.0099673	0.990177	0.239068	0.7811	0.342231	0.67311	0.575754	0.0729672	1.0337	0.228178	-1.57668	0.1418	0.445573	0.926626	-0.311038	0.751895	-0.772251	0.372268	-1.04443	0.335993	-0.081669	0.996107	-0.0161671	0.999983	-0.0805218	0.999778	-0.0771641	0.873392	-0.0258851	0.999992	0.174358	0.999994	0.0393287	0.999959
Actr5	0.123406	0.761637	-0.0398239	0.90176	0.130699	0.58308	0.233549	0.244654	0.232805	0.0891825	-0.215969	0.306054	0.0850365	0.820561	-0.0668327	0.989234	-0.0353618	0.888865	0.33637	0.0758049	0.220465	0.440338	-0.194086	0.534607	-0.0473328	0.999983	0.0388688	0.999778	-0.465045	0.0115287	-0.235304	0.999992	0.0408293	0.999994	0.0982509	0.999959
Actr6	-0.214313	0.660879	-0.203061	0.464199	-0.526428	0.0353991	-0.680157	0.00143361	-0.716603	9.8509e-05	0.133969	0.698667	-0.763188	0.00371339	-0.158494	0.911888	0.206535	0.472368	-0.700914	0.00436174	0.123568	0.868118	0.173173	0.778831	0.117473	0.999983	-0.201883	0.999778	-0.0401336	0.969492	0.0538189	0.999992	-0.15069	0.999994	-0.237208	0.999959
Actr8	-0.0896648	0.826506	-0.125494	0.494069	-0.0215895	0.956064	0.0523286	0.875703	-0.234176	0.0662994	0.139305	0.484744	-0.113794	0.692113	-0.0222466	0.989467	0.220702	0.231617	0.0558556	0.817705	-0.037165	0.960375	0.230546	0.357535	-0.053092	0.999983	-0.0597974	0.999778	0.238114	0.21666	-0.00996753	0.999992	0.0202429	0.999994	0.0330621	0.999959
Actrt1	NA	NA	NA	NA	NA	NA	NA	NA	NA	NA	NA	NA	NA	NA	NA	NA	NA	NA	NA	NA	NA	NA	NA	NA	NA	NA	NA	NA	NA	NA	NA	NA	NA	NA	NA	NA
Actrt2	-0.356626	NA	-0.563968	NA	-0.246079	NA	-0.127328	NA	0.309307	NA	-0.422816	NA	-0.00839018	NA	0.251146	NA	-0.503724	NA	-0.564054	NA	-0.102786	NA	-0.0533684	NA	0.937121	NA	1.28379	0.999778	0.0589432	NA	-1.0098	0.999992	1.24835	NA	-0.289977	0.999959
Actrt3	-0.0445552	0.97851	-0.56194	0.429067	0.334995	0.717887	0.0397274	0.99019	-1.20693	0.0200782	0.318221	0.72872	0.556232	0.73183	-0.514482	0.939385	-1.96785	0.0574241	0.198419	NA	-0.0118173	0.995311	-0.422872	0.874511	0.183556	0.999983	0.894442	0.999778	0.144466	0.948842	-0.617121	0.999992	0.022373	0.999994	-0.309997	0.999959
Acvr1	-0.334122	0.523018	-0.59481	0.0234555	0.229972	0.554234	0.252288	0.528406	-1.18403	5.76839e-08	0.0149839	0.974625	0.107494	0.842579	-0.508372	0.31987	0.288076	0.374333	-0.0807846	0.8384	-0.143994	0.864644	0.292982	0.565713	0.01418	0.999983	-0.0600304	0.999778	-0.0612319	0.953287	0.0168829	0.999992	-0.0831401	0.999994	-0.014893	0.999959
Acvr1b	-0.456351	0.55874	0.191805	0.747999	0.378994	0.483651	0.642046	0.174556	0.388678	0.302184	0.0116643	0.98629	0.508845	0.326669	-0.286101	0.888773	0.15918	0.770324	0.771565	0.0454151	0.226765	0.838877	0.500794	0.422471	0.0336575	0.999983	0.0797195	0.999778	-0.17841	0.857613	-0.0199395	0.999992	0.230897	0.999994	0.16982	0.999959
Acvr1c	-0.79254	0.490928	0.481533	0.532036	0.537926	0.548614	-1.44698	0.0178037	-0.16792	0.834298	-0.445013	0.611841	-0.640582	0.418511	-0.433834	0.871734	0.427147	0.537	0.0548298	0.942289	0.272398	0.881591	0.712622	0.435009	0.2123	0.999983	-0.370995	0.999778	0.24806	0.860023	-0.0764156	0.999992	0.100675	0.999994	-0.105523	0.999959
Acvr2a	-0.331913	0.600515	-0.543604	0.0836497	-0.0699524	0.9141	-0.156698	0.800575	-1.09856	1.28154e-05	-0.221355	0.625729	0.0406109	0.978053	-0.287687	0.805038	-0.021444	0.961052	0.00068849	0.998283	-0.00313803	0.996795	-0.00825878	0.996107	0.312798	0.999983	-0.478867	0.999778	0.46718	0.281195	0.156781	0.999992	0.13961	0.999994	0.220407	0.999959
Acvr2b	0.214344	0.920019	-0.67393	0.234736	0.712529	0.298324	0.808847	0.249451	-0.00744971	0.989639	0.0748477	0.936392	0.639426	0.37751	0.897852	0.335653	-1.08915	0.0461518	-0.869799	0.0996801	0.551602	0.543918	-0.46099	0.676661	0.275924	0.999983	-0.409362	0.999778	-0.874047	0.212244	0.386002	0.999992	0.553647	0.999994	-0.0371718	0.999959
Acvrl1	0.240923	0.83801	-0.621626	0.149924	0.230321	0.72524	0.235398	0.75465	-0.240305	0.583443	0.155981	0.832711	0.359997	0.591212	-0.0609834	0.989467	0.325149	0.520978	-0.171643	0.758875	-0.513979	0.498222	0.328765	0.733439	0.379319	0.999983	0.294515	0.999778	-0.296544	0.735817	0.468158	0.999992	0.13903	0.999994	-0.0503946	0.999959
Acy1	0.1792	0.911565	-0.0297256	0.968761	-0.0215802	0.978812	-0.180545	0.851581	-0.0259665	0.961239	0.158347	0.846962	-0.125619	0.894318	-0.00393874	0.997528	-0.742768	0.100206	-0.955298	0.0231841	-0.340677	0.734808	-0.630551	0.327959	0.0104129	0.999983	0.0463474	0.999778	-0.174368	0.8894	-0.0294848	0.999992	0.186161	0.999994	0.072303	0.999959
Acy3	0.273762	0.831253	-0.0694314	0.93066	0.368547	0.561302	0.139723	0.895256	0.431517	0.309453	0.627247	0.285768	0.0664289	0.965442	-0.130224	0.989467	-0.582598	0.207909	-0.499785	0.268098	-0.327477	0.745489	-0.236022	0.863018	-0.143063	0.999983	-0.124134	0.999778	0.128453	0.928301	0.607347	0.999992	-0.202919	0.999994	0.136313	0.999959
Acyp1	0.0504501	0.971741	-0.774434	0.0204023	-0.31485	0.502689	-0.507411	0.235878	-1.13844	6.57884e-05	0.272915	0.581736	-0.638703	0.263999	0.445601	0.710717	0.128081	0.831999	-0.319655	0.552353	-0.104748	0.953165	-0.118841	0.947326	0.00227739	0.999983	-0.14924	0.999778	0.450641	0.359423	-0.0822328	0.999992	-0.0831656	0.999994	-0.27152	0.999959
Acyp2	-0.179376	0.836358	-0.250657	0.522551	-0.565762	0.101997	-0.764936	0.0141016	-0.487105	0.0688322	0.312527	0.443427	-0.526251	0.264571	0.401646	0.648716	-0.417139	0.285402	-0.896684	0.0114687	-0.414971	0.489112	-0.490532	0.370069	0.165385	0.999983	-0.347634	0.999778	-0.191424	0.752378	-0.128914	0.999992	-0.248789	0.999994	-0.34588	0.999959
Ada	-0.248281	0.95755	1.33324	0.149721	-0.2063	0.909469	-0.480356	0.774161	1.45707	0.0610108	0.622598	0.62974	-0.306087	0.860568	-0.57099	0.917623	-1.19305	0.197736	-0.664357	0.495981	-0.829873	0.65346	-1.92094	0.0598921	-0.238739	0.999983	0.231751	0.999778	-0.101515	0.996583	0.329985	0.999992	-0.625729	0.999994	0.100694	0.999959
Adad1	-2.31632	NA	-0.661125	NA	-1.80218	NA	-0.14226	NA	-1.89342	NA	-0.908658	NA	-0.00839079	NA	2.67592	0.733409	-2.42909	NA	-0.564095	NA	2.66287	NA	-0.0533722	NA	0.0146748	0.999983	-3.50805	0.999778	-1.55607	NA	-0.322569	0.999992	-0.143816	NA	2.83528	0.999959
Adad2	-0.356641	NA	1.91931	NA	0.715678	NA	-0.127334	NA	3.27905	NA	-0.422834	NA	-0.00839055	NA	1.21292	NA	-0.503745	NA	-0.564079	NA	-0.10279	NA	-0.0533707	NA	0.638909	NA	1.45825	0.999778	-0.0122757	NA	1.52792	0.999992	0.880103	NA	-0.28999	0.999959
Adal	-0.0707022	0.928809	-0.325859	0.110444	-0.0751154	0.83565	-0.304316	0.20514	-0.642577	7.44932e-05	0.05208	0.905917	-0.298354	0.338325	0.0226979	0.989467	-0.00810295	0.979727	-0.226266	0.376101	0.0661191	0.931915	-0.0396463	0.98292	0.0236059	0.999983	0.205055	0.999778	-0.157084	0.675966	-0.152806	0.999992	0.100803	0.999994	0.110982	0.999959
Adam10	-0.379839	0.537857	-0.074945	0.90176	0.0514924	0.948439	-0.0909044	0.906079	-0.699551	0.0102866	-0.274792	0.534072	-0.0506015	0.962098	-0.0067229	0.994792	0.0619251	0.887694	-0.00543736	0.989688	0.443643	0.38655	-0.027057	0.996107	0.0640672	0.999983	-0.149188	0.999778	0.107928	0.902688	0.0233237	0.999992	-0.110182	0.999994	-0.0637708	0.999959
Adam11	-0.368969	0.569218	-0.889057	0.00221166	0.637241	0.0880594	0.641969	0.0895743	-1.47847	5.78771e-09	0.266676	0.552284	0.953405	0.835364	0.56683	0.893108	-0.0469546	0.972319	-0.153858	0.938233	-1.62219	0.196893	-0.173869	0.965534	-0.133337	0.999983	0.0754944	0.999778	-0.411442	0.290603	0.004526	0.999992	0.0676735	0.999994	-0.104151	0.999959
Adam12	-0.189655	0.935964	-0.000783381	0.999161	-0.631715	0.383614	-0.373351	0.692137	0.0603532	0.93911	-0.614467	0.409276	1.43152	0.103738	-0.0848424	0.989467	0.770773	0.283991	0.490473	0.559236	-0.117654	0.97737	-0.100514	0.990793	-0.054638	0.999983	-0.0598449	0.999778	-0.18826	0.90781	-0.0126429	0.999992	-0.0270038	0.999994	0.328114	0.999959
Adam15	0.296486	0.742893	-0.198185	0.709735	0.624642	0.139049	0.781037	0.0493126	0.660047	0.0378046	0.361117	0.462539	-0.248681	0.693646	-0.300263	0.860817	0.220527	0.641687	0.0853252	0.8621	-0.705816	0.1516	0.192087	0.879109	0.0408119	0.999983	0.146157	0.999778	-0.328648	0.611709	0.215012	0.999992	0.279024	0.999994	0.210057	0.999959
Adam17	0.230736	0.58055	0.0916508	0.778515	-0.478634	0.0417938	0.302581	0.239524	0.188221	0.350082	-0.494961	0.0570088	0.0313641	0.971904	-0.368784	0.36804	0.250359	0.299298	0.316867	0.165191	0.0392606	0.97644	0.069026	0.938669	-0.00519122	0.999983	-0.0426686	0.999778	-0.00975725	0.996583	0.0826321	0.999992	-0.0507132	0.999994	-0.0616396	0.999959
Adam19	0.139867	0.955977	0.227376	0.758592	0.0214581	0.979835	0.540011	0.408721	0.310075	0.538092	-0.0611279	0.942101	-0.00689969	0.999876	-0.775842	0.446846	1.27292	0.00771797	1.70656	0.000401188	-0.2184	0.89378	0.718853	0.313478	-0.119912	0.999983	-0.00328282	0.999778	-0.228916	0.847637	0.0463646	0.999992	-0.130795	0.999994	-0.108109	0.999959
Adam21	-0.356626	NA	-2.29776	NA	-0.246079	NA	-0.127328	NA	-0.652419	NA	-0.422816	NA	-0.00839018	NA	0.251146	NA	-0.503724	NA	-0.564054	NA	-0.102786	NA	-0.0533684	NA	-0.0246045	NA	-0.164027	0.999778	0.0587893	NA	-0.0480727	0.999992	-0.174324	NA	-0.289977	0.999959
Adam22	-0.498728	0.60937	-0.605669	0.228077	0.0190171	0.983648	-1.00592	0.0552215	-2.13114	3.10443e-06	-0.0663101	0.936056	-0.683936	0.464502	-0.144441	0.989467	1.18556	0.0428452	0.420315	0.642695	-0.216758	0.902676	0.259701	0.91072	0.0468796	0.999983	-0.0385919	0.999778	0.197779	0.79505	-0.118966	0.999992	0.0543313	0.999994	0.0828804	0.999959
Adam23	-0.856924	0.159918	-0.916067	0.0373882	-0.335783	0.629541	-0.342556	0.62693	-1.0945	0.00367837	-0.529432	0.372658	0.600293	0.620099	-0.185934	0.989467	1.09726	0.0759415	-0.10861	0.907755	-0.109806	0.965602	0.145096	0.961166	0.0350644	0.999983	-0.100129	0.999778	0.012941	0.996583	-0.123548	0.999992	-0.180253	0.999994	-0.0472651	0.999959
Adam28	-0.308294	0.792729	0.0189138	0.98105	-0.849037	0.0949453	-0.0600025	0.978071	-1.00304	0.00808473	-0.849382	0.1477	0.378042	0.565764	-0.182915	0.984793	0.312961	0.552427	-0.184155	0.7379	-0.389571	0.683382	0.768961	0.177536	1.4593	0.999983	-0.0239953	0.999778	-3.59804	0.116793	-0.0575802	0.999992	0.331463	0.999994	-0.705746	0.999959
Adam29	NA	NA	NA	NA	NA	NA	NA	NA	NA	NA	NA	NA	NA	NA	NA	NA	NA	NA	NA	NA	NA	NA	NA	NA	NA	NA	NA	NA	NA	NA	NA	NA	NA	NA	NA	NA
Adam30	0.076857	0.973991	-1.40616	0.0693274	-1.24853	NA	0.240585	0.887511	-1.52813	0.0218357	-1.02726	0.301392	0.405664	NA	-0.71713	0.93748	1.24473	NA	1.02041	NA	-2.22822	NA	3.11548	0.251964	0.49536	0.999983	-0.139843	0.999778	0.178494	0.956026	0.896355	0.999992	1.04856	0.999994	-0.231414	0.999959
Adam33	0.700319	0.530799	-0.546773	0.431432	1.03742	0.131398	0.524839	0.527322	-0.204307	0.763868	-0.204211	0.846962	0.579059	0.549991	0.861552	0.509632	0.700698	0.277705	0.323951	0.673903	-1.39316	0.0389842	-0.338361	0.841083	-1.12441	0.999983	0.645063	0.999778	-1.65855	0.259053	-0.405684	0.999992	0.684218	0.999994	-1.03284	0.999959
Adam8	1.18342	0.222277	0.59213	0.454456	0.582935	0.514764	0.793928	0.349776	0.956754	0.0969709	1.13383	0.185839	-0.705639	0.533962	-0.801401	0.709501	0.761085	0.37488	1.5339	0.0507112	-0.247059	0.922894	0.55721	0.740142	-0.180562	0.999983	1.64689	0.999778	1.04982	0.795939	-0.0476251	0.999992	1.43352	0.999994	1.01548	0.999959
Adam9	-0.507249	0.23903	0.0920333	0.855484	-0.0256693	0.962232	-0.0554666	0.950031	-0.307207	0.250781	-0.299702	0.427465	-0.392669	0.289052	-0.404917	0.529945	0.0896091	0.829985	-0.172977	0.60991	0.0264435	0.992151	0.28807	0.58834	-0.0503997	0.999983	-0.165405	0.999778	0.241698	0.636528	-0.0299393	0.999992	-0.0645822	0.999994	0.0259965	0.999959
Adamts1	-0.0553255	0.971741	-0.546152	0.118944	-0.478291	0.242606	-0.687219	0.0674213	-0.721361	0.0129826	-0.629584	0.159757	0.0393276	0.988727	0.0404033	0.989467	1.18874	0.000987757	0.942623	0.0189813	-0.952251	0.0182282	0.441377	0.470137	0.172904	0.999983	0.142121	0.999778	0.0469185	0.990719	0.645132	0.999992	-0.124488	0.999994	-0.0938527	0.999959
Adamts10	-0.0429958	0.973282	-0.761091	0.0608468	0.301984	0.614105	0.313867	0.62693	-0.432168	0.262307	0.0239113	0.972045	0.297244	0.690345	0.0890137	0.989467	0.351438	0.482637	0.253452	0.637357	-0.461532	0.571938	-0.0193319	0.996107	-0.0578531	0.999983	-0.0122774	0.999778	-0.999788	0.0883787	0.193486	0.999992	-0.04156	0.999994	-0.247675	0.999959
Adamts12	-0.592611	0.594234	-0.367226	0.623906	0.310191	0.723501	-0.280686	0.796076	-0.0603462	0.937784	0.168856	0.878638	-0.147612	0.923605	-0.539175	0.791022	0.617942	0.345794	0.806794	0.248713	-0.899093	0.295607	-0.0321049	0.996107	-0.312417	0.999983	0.204003	0.999778	-0.0938127	0.981389	-0.177087	0.999992	0.00149148	0.999994	0.135694	0.999959
Adamts13	-0.189901	0.962191	-1.58086	0.0191985	0.822495	0.365983	0.543551	0.627264	-1.60828	0.00801868	0.138075	0.930745	0.628537	0.55806	0.17086	0.989467	-0.321249	0.747664	-0.625278	0.431154	-0.599894	0.706361	-1.06097	0.327225	0.281161	0.999983	0.0465624	0.999778	-1.66453	0.191593	-0.527964	0.999992	-0.0353829	0.999994	-0.0996212	0.999959
Adamts14	-0.0319476	0.984371	0.247253	0.779424	0.651685	0.391781	0.31093	0.777549	0.370129	0.524188	-1.17386	0.111643	0.246007	0.867857	0.0594469	0.989467	1.04786	0.161259	1.33613	0.119533	-0.338381	0.853218	-0.409351	0.809054	-0.290619	0.999983	-0.306441	0.999778	-0.586985	0.774743	-0.658312	0.999992	-1.1277	0.999994	-0.471475	0.999959
Adamts15	-0.430787	0.670879	0.0477023	0.951047	0.187898	0.816832	-0.0750713	0.964265	0.0139552	0.979622	0.636107	0.28823	0.0768089	0.962493	-0.178009	0.989467	-0.103164	0.882221	1.32959	0.00468852	0.186501	0.912025	0.660164	0.347119	0.0978016	0.999983	-0.120902	0.999778	-0.649656	0.357314	0.271351	0.999992	0.803028	0.999994	0.204837	0.999959
Adamts16	1.49144	0.802858	-2.3912	0.411551	2.13627	NA	-3.00734	0.0830113	-3.87793	0.0332528	4.52101	0.0839745	1.39109	NA	0.916843	0.96016	0.297287	NA	0.776646	NA	3.06961	NA	1.56836	0.576581	0.668812	0.999983	0.0081691	0.999778	-0.0589843	0.996583	0.0193695	0.999992	-0.225453	0.999994	0.258526	0.999959
Adamts17	0.0214627	0.984765	-0.686899	0.0916806	0.625717	0.186416	0.191989	0.817262	-1.72974	6.68801e-08	0.348095	0.526784	0.468876	0.718487	-0.111053	0.989467	1.37043	0.088524	2.65911	0.00592085	-0.84864	0.388696	0.521053	0.715005	0.124965	0.999983	0.645038	0.999778	-0.381687	0.646435	0.0551116	0.999992	0.603422	0.999994	-0.491555	0.999959
Adamts18	0.0401592	0.985961	-0.979264	0.240404	-1.45812	0.125696	0.0468655	0.99019	-1.79944	0.00851937	1.2152	0.296365	0.54839	0.665815	-0.503782	0.902179	1.92508	0.0100349	-0.0037335	0.996724	-0.787269	0.576579	1.3248	0.182829	-0.163083	0.999983	0.132296	0.999778	-0.701032	0.552879	-0.0395902	0.999992	-0.754658	0.999994	-0.27769	0.999959
Adamts19	-0.436559	0.629166	-0.787492	0.0663333	0.197208	0.78772	-0.396756	0.525758	-1.49775	1.90157e-05	-0.268045	0.681322	0.427349	0.730893	-0.548423	0.738702	1.0605	0.0688178	-1.63429	0.0175345	-2.14268	0.000117643	-1.02589	0.150745	0.247868	0.999983	-0.132195	0.999778	0.488402	0.497873	0.0498603	0.999992	0.151041	0.999994	0.41916	0.999959
Adamts2	-0.060058	0.971741	-0.486811	0.225759	0.572299	0.187733	0.44005	0.369878	-0.227965	0.555333	0.680259	0.163492	0.344967	0.556229	-0.209854	0.950614	0.982566	0.00925778	0.660137	0.103355	-0.927793	0.0348603	0.183379	0.898118	0.0449399	0.999983	0.101345	0.999778	-0.0260535	0.996583	0.526655	0.999992	-0.100556	0.999994	0.0246655	0.999959
Adamts20	-0.465538	0.802858	0.532923	0.542744	-0.583388	0.583661	-1.36638	0.0863796	0.306684	0.686814	0.128549	0.930745	-0.33073	0.92766	0.119721	0.989467	0.674552	0.70279	2.49727	0.124255	-2.30818	0.179001	0.497068	0.928459	0.0782573	0.999983	0.0268913	0.999778	-0.162333	0.945529	0.148656	0.999992	0.243473	0.999994	-0.126451	0.999959
Adamts3	-0.266925	0.819165	-0.187426	0.775735	-0.0564101	0.960682	-0.227063	0.786797	-0.194638	0.684621	0.224681	0.753122	0.477988	0.456877	-0.320316	0.875598	0.782978	0.0810915	0.473011	0.407895	-0.86021	0.117996	1.08261	0.0327057	0.190336	0.999983	-0.230815	0.999778	0.0395045	0.996583	-0.0879808	0.999992	0.264148	0.999994	-0.0566132	0.999959
Adamts4	0.313024	0.928115	3.51716	7.01463e-08	-1.04932	0.32006	0.430511	0.814207	5.74394	2.73445e-21	-2.11953	0.0368919	0.375641	0.811583	-0.333781	0.984793	-0.656734	0.480106	0.373786	0.731222	0.713752	0.681794	-1.29377	0.245353	0.0810287	0.999983	0.0241258	0.999778	-0.432169	0.803886	0.181117	0.999992	-0.153167	0.999994	0.0337386	0.999959
Adamts5	-0.525229	0.724323	-0.26231	0.790479	-0.652922	0.422872	-1.03581	0.156229	-1.13425	0.0363043	-0.944076	0.24519	0.387963	0.809013	-0.318951	0.970178	1.38974	0.0576992	0.23925	0.817163	-0.0978904	0.988839	0.252482	0.924272	0.199133	0.999983	-0.28466	0.999778	0.520709	0.654301	0.190243	0.999992	-0.232791	0.999994	0.108349	0.999959
Adamts6	-0.151691	0.934766	0.0302454	0.96827	0.00627859	0.992497	-0.250252	0.75917	0.0344358	0.9528	-1.08489	0.0459236	-0.379363	0.675127	0.0776458	0.989467	1.40002	0.00610343	0.00928147	0.990171	-0.0322048	0.992151	-0.0947111	0.981913	0.663453	0.999983	0.244552	0.999778	0.177537	0.883078	0.000577519	0.999992	0.411539	0.999994	0.125224	0.999959
Adamts7	0.119042	0.970285	-0.409892	0.539269	0.774094	0.21636	-0.31766	0.730637	0.143585	0.830673	-0.296749	0.711113	0.646527	0.39448	0.164389	0.989467	0.0364963	0.960688	1.17973	0.0466146	-0.284485	0.857253	-0.0111743	0.996107	0.295342	0.999983	0.10876	0.999778	-0.268931	0.875747	0.197092	0.999992	0.673372	0.999994	1.19262	0.999959
Adamts8	-0.115496	0.966395	0.323573	0.6056	0.0330521	0.970156	0.104727	0.935615	-0.338682	0.47113	-0.0934588	0.930745	0.619362	0.44984	0.316502	0.932764	1.03639	0.0576478	-0.121895	0.873917	-0.960545	0.172515	0.0482631	0.996107	-0.0385436	0.999983	0.239507	0.999778	0.77257	0.324867	-0.168663	0.999992	0.26813	0.999994	0.389281	0.999959
Adamts9	-0.259637	0.843183	-0.152751	0.847845	-0.112159	0.903319	0.0390597	0.99019	0.192172	0.712973	-0.496028	0.410486	0.0247351	0.999876	-0.809846	0.41273	0.614793	0.277585	0.0190675	0.979655	-0.7252	0.386358	0.233557	0.903381	0.15778	0.999983	-0.126549	0.999778	0.062353	0.989254	0.132858	0.999992	0.314203	0.999994	0.566457	0.999959
Adamtsl1	-0.0574241	0.977592	0.748729	0.303858	0.335873	0.769016	-0.877344	0.278541	0.718463	0.224925	-0.246293	0.83197	1.0346	0.272088	0.596034	0.823065	0.529563	0.538889	0.686717	0.418497	-0.619139	0.665281	-0.258841	0.921352	0.3627	0.999983	0.129159	0.999778	0.140745	0.950931	-0.0574892	0.999992	0.187917	0.999994	0.0908171	0.999959
Adamtsl2	0.382625	0.772998	-0.0295795	0.974097	0.99997	0.091208	1.29793	0.0153315	0.827667	0.0712779	0.5348	0.439383	-0.317066	0.78837	-0.359269	0.92334	0.97575	0.116216	1.05597	0.167029	-0.989958	0.24108	0.684207	0.503596	-0.0600743	0.999983	-0.267075	0.999778	-0.283933	0.821488	0.0930662	0.999992	-0.0233206	0.999994	0.108011	0.999959
Adamtsl3	-0.807101	0.367054	-0.580558	0.346577	0.349717	0.67828	0.447559	0.581067	-1.25701	0.00549835	-1.08296	0.124574	0.581017	0.602843	0.862519	0.512945	1.0277	0.133774	0.0408045	0.964045	-1.20475	0.101289	-0.635188	0.556826	-0.1332	0.999983	-0.668577	0.999778	0.271984	0.860023	-0.0934416	0.999992	0.57055	0.999994	-0.539436	0.999959
Adamtsl4	0.388271	0.80205	-0.364401	0.649065	0.639533	0.388897	1.2735	0.0400952	-0.260317	0.688563	0.328625	0.711294	-0.0961382	0.958966	-0.15267	0.989467	-0.810761	0.180345	-0.0581803	0.937189	-0.481719	0.70569	0.570658	0.592975	0.469906	0.999983	0.357227	0.999778	-0.32777	0.846491	0.122353	0.999992	0.212436	0.999994	-0.533402	0.999959
Adamtsl5	-0.0590545	0.971741	-0.569322	0.263068	1.08728	0.0333439	0.258409	0.761454	-0.53545	0.202995	0.785756	0.196512	0.305526	0.67397	-0.0532946	0.989467	-0.596779	0.21422	-0.49044	0.298807	-0.280114	0.812894	-0.220703	0.88909	-0.0766314	0.999983	0.0970226	0.999778	-0.603123	0.403599	-0.194042	0.999992	-0.314318	0.999994	-0.232877	0.999959
Adap1	1.42762	0.000169898	0.936175	0.0124142	-0.0103595	0.987372	1.37656	0.000290415	1.38883	1.27431e-05	0.125279	0.880163	-0.0858003	0.925789	-0.293311	0.869598	-0.406833	0.329381	-0.36605	0.362878	-0.0992614	0.949546	0.459506	0.453305	-0.245489	0.999983	-0.0440168	0.999778	-0.414165	0.489967	-0.0218334	0.999992	0.0901256	0.999994	-0.0724543	0.999959
Adap2	-0.376804	0.772998	0.130088	0.901522	0.360521	0.635719	0.355238	0.673892	-0.0718126	0.93298	0.218375	0.804976	-0.449922	0.601898	0.250049	0.971228	1.05899	0.0611889	0.531051	0.404814	0.106459	0.969261	0.537498	0.608521	0.298887	0.999983	-0.421579	0.999778	0.461545	0.657238	0.092847	0.999992	0.128372	0.999994	0.51075	0.999959
Adar	1.69534	7.20253e-23	1.53207	6.84263e-19	0.322732	0.236251	1.98025	5.07546e-31	1.73675	6.70265e-25	0.0112128	0.976994	1.29037	6.99974e-12	0.256994	0.681836	-0.124473	0.670958	1.34574	1.07011e-12	0.94659	7.15035e-06	-0.00484737	0.996107	0.271722	0.999983	0.114841	0.999778	-0.0673415	0.918169	0.119281	0.999992	0.305957	0.999994	0.0874592	0.999959
Adarb1	-0.209468	0.665016	0.294867	0.219526	0.382563	0.139278	-0.260885	0.375601	0.0490775	0.872013	-0.100375	0.788638	-0.121193	0.895009	0.11099	0.989467	0.496283	0.3009	0.952163	0.102867	-0.135191	0.913517	-0.166265	0.918079	-0.19644	0.999983	-0.023937	0.999778	-0.227662	0.51733	-0.0542347	0.999992	-0.0474437	0.999994	-0.0535305	0.999959
Adarb2	-0.476959	0.837314	0.591265	0.415102	-2.71281	0.132526	-0.693843	0.470452	0.908508	0.0311469	-1.48411	0.132475	1.8342	0.576893	0.251164	0.989467	-0.50376	0.882221	-0.564095	0.855774	-0.102793	0.992151	-0.0533722	0.996107	-0.0385026	0.999983	0.0121354	0.999778	0.237989	0.60938	0.0220354	0.999992	-0.00988021	0.999994	-0.125978	0.999959
Adat1	0.090668	0.960652	-0.103768	0.862069	-0.200258	0.718084	-0.220983	0.705841	-0.0543637	0.914518	0.442027	0.338809	-0.158574	0.845545	0.0519637	0.989467	0.534248	0.266329	-0.180689	0.750785	-0.0412999	0.992151	-0.0150843	0.996107	-0.00255678	0.999983	-0.0357046	0.999778	-0.238017	0.711749	-0.000676906	0.999992	0.0310785	0.999994	0.090196	0.999959
Adat2	-0.0751722	0.951956	0.207844	0.512567	0.141622	0.733413	-0.383063	0.211407	0.24925	0.286868	-0.316399	0.338991	0.0410033	0.978341	0.0127215	0.989467	0.896908	0.00167807	0.337276	0.316468	0.133786	0.881918	0.0211396	0.996107	0.103277	0.999983	0.00432941	0.999778	0.204691	0.638156	-0.0637683	0.999992	-0.133731	0.999994	-0.1822	0.999959
Adat3	0.684406	0.743623	0.553584	0.57669	1.61429	0.135363	0.938158	0.453411	1.4169	0.0205242	-0.00836224	0.995057	0.808399	0.471075	0.211129	0.989467	-0.00997678	0.992674	0.779061	0.38728	0.0111293	0.995311	-0.46724	0.822466	-0.421782	0.999983	-0.112824	0.999778	-0.448021	0.804134	0.195128	0.999992	-0.029066	0.999994	-0.320405	0.999959
Adck1	0.0488025	0.971741	-0.052749	0.901877	0.490616	0.0706175	0.461847	0.0850726	-0.0371125	0.920895	0.217465	0.504755	0.0672517	0.903292	-0.0511805	0.989467	-0.010631	0.975322	0.0171934	0.956781	0.184601	0.739324	-0.177654	0.766063	-0.0690295	0.999983	0.103813	0.999778	-0.394299	0.187462	-0.071899	0.999992	0.227578	0.999994	0.108256	0.999959
Adck2	0.442498	0.282694	0.0956256	0.824972	0.411436	0.17676	0.414944	0.192451	0.273556	0.253959	0.381035	0.267189	-0.0983656	0.856249	0.151572	0.945291	-0.32913	0.275154	-0.0356405	0.920079	-0.0115192	0.992151	0.0950285	0.927907	-0.0464084	0.999983	-0.0243017	0.999778	-0.278294	0.515552	0.0602845	0.999992	-0.0494213	0.999994	-0.0282469	0.999959
Adck5	0.200059	0.895011	-0.22008	0.748057	0.429671	0.482137	0.212949	0.822894	0.277936	0.556764	0.123755	0.899465	-0.207202	0.809366	-0.221638	0.965739	-0.705854	0.129355	-0.78221	0.0741306	-0.261434	0.833887	-0.135812	0.942546	-0.111255	0.999983	-0.0902786	0.999778	-0.428511	0.579603	-0.00880957	0.999992	-0.177281	0.999994	-0.0828186	0.999959
Adcy1	-0.635544	0.438597	0.512528	0.29936	0.19611	0.81968	-0.0238219	0.99019	0.851569	0.0225229	-0.357627	0.598117	-0.306535	0.831682	0.739086	0.506003	0.758722	0.208562	1.14643	0.0656137	-0.672822	0.360269	-0.234381	0.903849	-0.20622	0.999983	0.0273572	0.999778	-0.335071	0.647663	-0.185326	0.999992	-0.358429	0.999994	-0.245121	0.999959
Adcy10	-0.770124	0.802225	-0.313151	0.890288	1.09201	NA	-0.400726	0.878008	-0.998974	0.379979	0.0225462	0.990486	-2.82528	NA	-1.95885	0.64893	1.15532	NA	-3.70747	NA	-2.29058	NA	0.234211	NA	-0.0950421	0.999983	-0.109789	0.999778	0.69562	0.774936	0.257341	0.999992	-0.437759	0.999994	1.14665	0.999959
Adcy2	-0.288478	0.769553	-0.694795	0.0752311	0.483939	0.319135	0.42488	0.423173	-0.885956	0.00729264	-0.379635	0.467961	-0.495863	0.412282	0.0934443	0.989467	0.543376	0.269927	0.430449	0.382303	-0.324528	0.736191	0.0878098	0.976543	-0.04379	0.999983	-0.104514	0.999778	0.219934	0.793659	-0.000485341	0.999992	0.0921331	0.999994	0.0855679	0.999959
Adcy3	-0.133131	0.941263	-0.737947	0.0722653	0.794396	0.0892841	-0.148811	0.871583	-1.40338	2.49239e-05	0.84427	0.113048	0.451266	0.478807	0.746188	0.357455	0.386985	0.437583	0.382455	0.431154	-0.345149	0.718074	0.402727	0.642534	-0.100707	0.999983	0.117091	0.999778	-0.039092	0.996583	-0.0303693	0.999992	0.211432	0.999994	0.122711	0.999959
Adcy4	-0.0452751	0.973282	-0.979431	0.0137991	0.683148	0.168865	0.275649	0.702854	-0.722466	0.0516608	0.197016	0.780067	-0.0650153	0.974791	0.414446	0.800654	0.314792	0.569708	0.0758341	0.901046	-0.482544	0.57173	0.325174	0.76177	0.223543	0.999983	0.432564	0.999778	-0.736802	0.262246	0.307691	0.999992	0.880714	0.999994	-0.638688	0.999959
Adcy5	-0.339496	0.63768	-0.922368	0.00264197	0.473776	0.251557	0.330411	0.495849	-0.79115	0.00585149	-0.130888	0.828913	0.718513	0.0884712	0.771824	0.123175	0.933266	0.00550268	0.552385	0.124266	-1.11867	0.0013086	-0.253765	0.750933	0.0218181	0.999983	-0.0681975	0.999778	-0.0196015	0.996583	-0.0542838	0.999992	0.221885	0.999994	0.010335	0.999959
Adcy6	-0.171619	0.72725	-0.421232	0.032374	0.257449	0.314192	0.139387	0.68224	-0.231104	0.223176	0.173676	0.541779	0.313935	0.216908	0.0135938	0.989467	-0.436776	0.0310517	0.203608	0.346141	0.055066	0.946965	-0.236516	0.484144	0.0401708	0.999983	0.186336	0.999778	-0.398634	0.118839	0.055176	0.999992	0.216624	0.999994	0.0551664	0.999959
Adcy7	-0.0173257	0.98793	0.349299	0.48967	-0.184031	0.789179	0.306077	0.632763	-0.142018	0.771878	-0.388738	0.475569	0.090722	0.935837	-0.495027	0.651377	0.946298	0.0230155	1.09696	0.00991333	-0.118573	0.942575	0.815322	0.121245	0.279878	0.999983	0.541212	0.999778	0.178618	0.874108	0.0438458	0.999992	0.603128	0.999994	0.4301	0.999959
Adcy8	0.110551	0.973082	-0.879838	0.472162	0.035921	0.983387	-0.652363	0.694985	-1.43889	0.105037	0.174769	0.930745	0.588498	0.72699	1.13443	0.673925	-2.47046	0.0111813	-0.382015	0.761068	0.310323	0.931197	-1.31	0.391671	0.0250942	0.999983	-0.0458479	0.999778	0.15444	0.97842	-0.137732	0.999992	0.184567	0.999994	0.00658417	0.999959
Adcy9	-0.340768	0.608764	-0.495439	0.142311	0.166604	0.754706	0.321893	0.482217	-0.761361	0.0054043	-0.52782	0.212244	0.701994	0.0587911	-0.237905	0.886621	0.0901915	0.853501	0.347341	0.313475	-0.130072	0.908132	-0.363348	0.513221	0.0647577	0.999983	-0.0687056	0.999778	0.207844	0.747261	0.0269119	0.999992	0.24873	0.999994	0.0553724	0.999959
Adcyap1	-0.356651	0.971741	-0.564008	0.90176	0.715698	0.875257	-0.127338	0.99019	0.309329	0.93298	-0.422847	0.930745	1.83855	0.575165	0.0715858	0.989467	2.19086	0.263556	3.43399	0.0463243	-0.334114	0.939403	0.514747	0.920284	0.249859	0.999983	0.135495	0.999778	0.523991	0.0477312	-0.166275	0.999992	0.241213	0.999994	-0.126147	0.999959
Adcyap1r1	0.109105	0.962566	-0.640324	0.153817	-0.745533	0.135392	-0.133186	0.894813	0.0617504	0.931671	-1.18915	0.0171328	0.0326704	0.999876	0.374389	0.886315	0.672142	0.258557	0.663951	0.274884	-0.972566	0.140689	-0.440825	0.695963	-0.0188707	0.999983	-0.00805194	0.999778	0.302907	0.686094	-0.0204973	0.999992	0.129267	0.999994	0.395466	0.999959
Add1	0.0417629	0.956945	-0.167478	0.324548	-0.108871	0.616943	0.118379	0.605753	-0.150634	0.28461	-0.1623	0.408546	0.112064	0.644021	-0.196879	0.584633	0.209413	0.193128	0.472729	0.00091707	0.0980813	0.799796	0.245439	0.229148	-0.0222999	0.999983	-0.0363175	0.999778	0.042417	0.925635	-0.00402754	0.999992	0.132283	0.999994	0.0695747	0.999959
Add2	-0.272179	0.971741	-1.6262	0.113861	-0.610835	0.737041	0.468744	0.87626	0.308774	0.805365	1.22824	0.418823	0.0486242	0.999876	0.571609	0.935621	0.601543	0.6131	-0.621811	0.570065	-0.894187	0.656556	-2.70019	0.0074643	-0.0211005	0.999983	-0.0182576	0.999778	0.169569	0.97014	-0.021873	0.999992	0.192275	0.999994	0.172615	0.999959
Add3	-0.322574	0.592374	-0.320661	0.354864	-0.242637	0.564334	-0.240711	0.597296	-0.903198	0.000215471	-0.424947	0.273277	0.100749	0.866857	-0.0479599	0.989467	0.873403	0.00221118	0.601548	0.0374136	0.123387	0.902577	0.0204082	0.996107	0.0403711	0.999983	-0.14754	0.999778	0.00357911	0.996583	0.0262262	0.999992	-0.0451014	0.999994	0.0552143	0.999959
Adgb	-0.150843	0.955995	-0.922687	0.0869087	0.0201361	0.982769	-0.0146849	0.99027	-1.91443	1.02747e-05	0.0753989	0.935775	-0.00839079	0.999876	0.251164	0.989467	1.91894	0.41204	-1.13693	0.611546	-0.844413	0.851943	2.36903	0.497026	0.230479	0.999983	0.681787	0.999778	0.849057	0.300499	0.11591	0.999992	0.421773	0.999994	0.961333	0.999959
Adgra1	2.08164	0.635468	-3.26144	0.000259754	-2.22766	0.0358332	-0.164514	0.963825	-1.13015	0.21476	-2.55014	0.0115294	-1.84196	0.584546	4.43077	0.0764173	-0.50376	0.882221	2.26441	0.272682	-0.905623	0.792836	-1.3975	0.71889	-0.060012	0.999983	0.156338	0.999778	0.417715	0.655712	0.0272829	0.999992	0.486584	0.999994	0.205931	0.999959
Adgra2	-0.238108	0.788492	-0.751942	0.0196036	-0.0180153	0.977789	0.202373	0.739195	-0.358813	0.262535	-0.11743	0.85207	0.775043	0.0597478	0.411484	0.649563	0.779394	0.0248271	0.741057	0.0338592	-0.750177	0.0745743	-0.2299	0.799894	0.159286	0.999983	0.0138449	0.999778	-0.323749	0.585527	0.187245	0.999992	0.181733	0.999994	-0.118236	0.999959
Adgra3	-0.490485	0.210317	-0.558986	0.027238	-0.163903	0.691781	0.100545	0.863451	-0.691078	0.00174258	-0.295401	0.39619	0.142051	0.773077	-0.0252252	0.989467	0.427442	0.125702	1.0018	7.23569e-05	0.157263	0.831159	-0.134644	0.880747	0.0404292	0.999983	-0.0157474	0.999778	0.140218	0.817215	-0.02088	0.999992	0.0379897	0.999994	0.227626	0.999959
Adgrb1	0.258964	0.932639	-0.359907	0.664909	1.16248	0.243589	0.71998	0.457681	-0.0978477	0.899111	-0.915496	0.386298	-0.342649	0.835364	1.92164	0.0457488	0.00702029	0.994637	-1.1497	0.240962	-0.282558	0.892159	-0.622055	0.678027	-0.124251	0.999983	-0.0534392	0.999778	-0.138255	0.812239	0.072232	0.999992	0.0708806	0.999994	-0.022737	0.999959
Adgrb2	-0.100191	0.971741	-0.530874	0.300609	0.789383	0.149411	0.951327	0.0899405	-0.31602	0.480161	0.200253	0.798998	0.682127	0.233422	0.836	0.265212	-0.96245	0.0345703	-0.0911476	0.876356	0.0954358	0.962372	-1.07234	0.0326974	-0.159012	0.999983	-0.0951474	0.999778	-0.374703	0.59323	-0.0141367	0.999992	0.149526	0.999994	0.0677668	0.999959
Adgrb3	-0.406202	0.84427	-0.578882	0.558322	-0.711656	0.604657	-0.94367	0.448886	-3.07061	0.0167809	3.16368	0.167657	0.736113	0.656085	0.920406	0.429322	-0.14345	0.894917	1.11435	0.303184	-0.564822	0.605807	-0.181637	0.96468	0.121194	0.999983	-0.092931	0.999778	0.120011	0.565289	-0.103806	0.999992	0.10362	0.999994	0.0748236	0.999959
Adgrd1	0.330022	0.851161	0.122931	0.907808	0.249053	0.813569	0.229302	0.859778	0.391887	0.524182	-0.508514	0.538795	1.06028	0.188206	0.049401	0.989467	1.09673	0.0927307	0.746267	0.266875	-0.240837	0.911238	0.18805	0.941519	-0.0518336	0.999983	-0.177375	0.999778	0.281247	0.851625	-0.389198	0.999992	0.317917	0.999994	0.194112	0.999959
Adgre1	1.03773	0.181058	1.45325	0.00297165	-0.394742	0.618718	0.525123	0.496806	0.309593	0.592092	0.222336	0.814494	0.172353	0.878234	-0.571141	0.734543	0.10644	0.887191	0.363034	0.569295	0.466382	0.695223	0.255618	0.899064	-8.35316e-06	0.999983	0.0738276	0.999778	-0.194436	0.897798	-0.0264817	0.999992	0.00599043	0.999994	0.155031	0.999959
Adgre3	1.29785	0.215839	0.506671	0.590839	-1.03939	0.21805	0.367714	0.788481	-0.868324	0.181719	-0.108619	0.932084	0.174651	0.923484	-0.438899	0.932484	-0.431524	0.638128	0.809282	0.356022	-0.144622	0.969446	0.0154786	0.996107	2.57221	0.999983	1.17734	0.999778	-2.38646	0.474355	0.115316	0.999992	0.806109	0.999994	-0.893285	0.999959
Adgre5	0.139839	0.857123	-0.532014	0.0364619	0.139347	0.742938	0.342111	0.307694	-0.788718	0.0002544	-0.308968	0.36794	0.105689	0.837319	-0.0267289	0.989467	0.349723	0.219364	0.55899	0.0304642	-0.230795	0.688631	0.0237551	0.996107	0.132354	0.999983	0.425089	0.999778	0.466361	0.224379	0.145475	0.999992	0.562715	0.999994	0.133818	0.999959
Adgrf1	-2.42839	NA	1.52016	NA	-0.516971	NA	-2.09921	NA	0.534895	NA	2.45736	NA	-1.77827	NA	-1.61056	NA	-1.46555	NA	-0.564095	NA	0.829226	NA	-0.910734	NA	-0.0246063	0.999983	-0.144361	0.999778	-0.903182	NA	-0.0480761	0.999992	-1.67731	NA	2.25538	0.999959
Adgrf2	0.225608	0.971741	-1.76871	0.138282	-0.518091	NA	0.550256	0.807257	-1.10955	0.254671	-1.65641	0.211745	0.560829	NA	-0.83166	0.942119	-2.36565	NA	0.71245	NA	-1.2999	NA	-1.97148	0.616777	-0.65336	0.999983	-0.543641	0.999778	-0.186388	0.952093	-0.0553186	0.999992	-0.186503	0.999994	0.62814	0.999959
Adgrf3	-0.11341	0.971741	-0.879741	0.377592	0.649696	NA	-0.55657	0.726114	-1.22852	0.129458	0.917701	0.436605	0.061577	NA	-0.680321	0.964801	1.84357	NA	0.527593	NA	-1.12734	NA	0.652706	0.920284	0.0441384	0.999983	0.740274	0.999778	0.542722	0.799474	-0.52226	0.999992	-0.0959314	0.999994	-0.401472	0.999959
Adgrf4	2.11025	0.650217	-3.19434	0.118545	-3.05276	NA	0.259438	0.970304	-3.51702	0.0401156	-0.726829	0.780386	1.83386	NA	-0.710631	0.989467	2.70083	NA	-2.9737	NA	-0.99136	NA	1.83407	0.715901	-0.349077	0.999983	-0.539108	0.999778	-1.29396	0.286215	-0.114139	0.999992	0.12321	0.999994	-0.419562	0.999959
Adgrf5	0.0372669	0.977592	-0.365366	0.489786	-0.189433	0.792601	0.324661	0.625377	-0.597167	0.117183	-0.86745	0.114344	1.23109	0.0074683	0.207173	0.965898	1.24808	0.00237949	0.870476	0.0386801	-0.460285	0.576361	0.144612	0.93115	0.619762	0.999983	0.275456	0.999778	0.529169	0.404197	0.561005	0.999992	0.584701	0.999994	0.250849	0.999959
Adgrg1	0.178408	0.919387	-0.0242216	0.975991	0.602738	0.299496	0.693456	0.228855	0.466587	0.298434	0.212302	0.788464	0.416421	0.54885	0.397423	0.841412	-1.26899	0.00491877	0.374138	0.468482	0.517539	0.56601	-0.826829	0.173476	0.0756765	0.999983	-0.0985714	0.999778	-0.259793	0.800996	0.0647598	0.999992	0.0660901	0.999994	0.0402155	0.999959
Adgrg2	-0.478891	0.730598	-0.775056	0.216174	0.551694	0.483812	-0.1533	0.915306	-1.68529	0.000427973	-0.423772	0.613062	-1.80824	0.147864	-0.436227	0.989467	1.10814	0.405533	-0.441177	0.739613	-2.66831	0.0691475	-1.15552	0.580798	-0.0943567	0.999983	-0.045049	0.999778	0.745525	0.383624	-0.220783	0.999992	0.376163	0.999994	0.0245407	0.999959
Adgrg3	1.77043	0.175502	-0.743426	0.460973	1.04155	0.519819	-0.362847	0.84023	0.485642	0.610869	0.386611	0.861588	0.501389	0.640234	0.0978995	0.989467	0.761506	0.301242	0.278463	0.743539	-0.465023	0.77876	-0.404256	0.830858	-0.336675	0.999983	-1.17658	0.999778	0.555565	0.893814	-1.94329	0.999992	0.457358	0.999994	4.72898	0.222977
Adgrg4	-0.356651	0.971741	-1.5258	0.696313	-0.246097	0.962232	0.834457	0.894898	0.309329	0.936093	-0.422846	0.931885	-0.147799	0.987722	0.581276	0.984793	-0.748793	0.680606	0.0660338	0.970239	0.179255	0.992151	-0.917698	0.809693	-0.0246063	0.999983	-0.164044	0.999778	-0.903154	0.904587	-0.0480761	0.999992	-0.174343	0.999994	-0.289998	0.999959
Adgrg5	1.64649	0.079795	2.17022	0.000977797	0.433292	0.715419	1.21091	0.168487	1.82339	0.00323232	-0.219092	0.886414	0.0303163	0.999876	-0.711558	0.787039	0.906583	0.270368	0.74167	0.363222	-0.307647	0.903941	0.558518	0.745573	0.83672	0.999983	0.23551	0.999778	-0.560112	0.751973	0.472724	0.999992	-0.488982	0.999994	0.0661302	0.999959
Adgrg6	-0.450869	0.557779	-0.45576	0.306375	-0.304177	0.591273	-0.108448	0.909542	-1.33712	2.71772e-05	-0.184991	0.775002	-0.352648	0.602876	0.0757488	0.989467	0.726939	0.0953766	0.472104	0.322559	-0.159276	0.915384	0.481523	0.502206	0.335737	0.999983	-0.0990038	0.999778	-0.745188	0.168425	0.0588675	0.999992	-0.0198079	0.999994	-0.313859	0.999959
Adgrg7	0.28622	0.872507	-0.10889	0.915535	-1.02197	0.130287	0.631932	0.42441	0.108715	0.900628	0.15188	0.909874	0.150683	0.896665	-0.196366	0.989467	-0.506082	0.403238	0.211833	0.755927	0.163875	0.934091	-0.743793	0.352463	-0.0246063	0.999983	-1.60768	0.999778	0.0588704	0.996583	-1.00987	0.999992	-0.174343	0.999994	-0.289998	0.999959
Adgrl1	-0.205502	0.900821	-0.343751	0.59645	0.426306	0.527084	0.0478595	0.99019	-0.600247	0.177884	-0.219827	0.787427	0.768095	0.228025	0.691836	0.534221	0.0224146	0.973988	1.14528	0.0177835	0.243023	0.875627	0.672987	0.362941	-0.0938238	0.999983	-0.0638526	0.999778	-0.158211	0.906863	-0.0940124	0.999992	0.114155	0.999994	0.0195621	0.999959
Adgrl2	-0.305738	0.740178	-0.420107	0.332693	0.0337014	0.962232	0.0824801	0.938315	-0.491516	0.151281	-0.528638	0.282135	0.409959	0.4648	0.0265965	0.989467	0.652541	0.102745	0.795986	0.0421683	-0.284915	0.754485	0.175632	0.904679	0.110142	0.999983	-0.0745377	0.999778	0.300639	0.662257	-0.109939	0.999992	0.332049	0.999994	0.064449	0.999959
Adgrl3	-0.755172	0.260333	-0.552276	0.251564	0.420941	0.472763	0.295582	0.682893	-0.994455	0.00708388	-0.460768	0.424674	0.608611	0.382145	-0.0772679	0.989467	1.01417	0.0320655	1.2072	0.0287286	-0.362093	0.728147	0.147764	0.940059	0.149903	0.999983	-0.00360216	0.999778	0.417965	0.567501	-0.141787	0.999992	0.145084	0.999994	-0.0192837	0.999959
Adgrl4	-0.425344	0.516926	-0.98184	0.00156355	-0.317493	0.499215	-0.462245	0.292277	-1.49517	5.43978e-08	-0.353529	0.442676	-0.0288562	0.999876	0.0679733	0.989467	1.00958	0.00357337	0.0961343	0.855774	-0.488058	0.396779	-0.19375	0.867906	0.330941	0.999983	0.0381759	0.999778	0.32213	0.595995	0.164679	0.999992	0.291635	0.999994	0.00688868	0.999959
Adgrv1	0.0351827	0.981007	-1.70157	0.00034782	-0.166474	0.875222	0.197741	0.869839	-2.37769	4.8146e-08	-0.338489	0.679281	-0.900798	0.225508	0.268286	0.968709	-1.67018	0.00550268	-0.996382	0.0802047	-0.934994	0.230697	-1.63498	0.0144754	0.458696	0.999983	0.237708	0.999778	0.568017	0.525552	0.279353	0.999992	0.37688	0.999994	0.443502	0.999959
Adh7	1.85245	NA	-4.1946	NA	1.30357	NA	-4.89411	NA	-2.10341	NA	1.30091	NA	-0.00839078	NA	2.16432	0.873343	-2.32636	NA	-2.83433	NA	-1.06459	NA	1.75673	NA	0.824002	0.999983	1.85914	0.999778	-0.903135	NA	0.284462	0.999992	-1.81746	NA	-1.21521	0.999959
Adhfe1	-0.229928	0.85219	-1.72817	8.86599e-07	0.241524	0.716445	-0.533801	0.324506	-2.53769	3.05523e-14	-0.286089	0.643481	0.376711	0.754111	0.306381	0.963877	0.840887	0.20421	-1.82165	0.00569361	-0.409354	0.74314	0.895491	0.260873	0.304665	0.999983	0.208615	0.999778	-0.121299	0.924108	-0.0245997	0.999992	0.116965	0.999994	-0.111289	0.999959
Adi1	-0.00871713	0.994026	-0.703939	0.0399503	-0.439239	0.313377	-0.533093	0.211746	-0.699445	0.0210301	0.435714	0.342954	0.0354595	0.988727	0.537456	0.468211	-0.478032	0.199114	-1.06096	0.00111104	-0.376791	0.57818	-0.62406	0.168325	-0.0446557	0.999983	0.0549606	0.999778	-0.10631	0.918772	0.0739729	0.999992	-0.165532	0.999994	-0.142995	0.999959
Adig	2.62402	0.668195	-5.52358	0.0388131	0.564002	NA	-5.84992	0.0440547	0.514835	0.904993	-2.54392	0.493309	2.98212	NA	-17.663	2.14003e-11	-0.618477	NA	-4.23487	NA	-1.35907	NA	-0.995636	0.945316	-0.835176	0.999983	-1.07701	0.999778	-0.811958	0.935883	-0.0137511	0.999992	-0.18543	0.999994	0.62122	0.999959
Adipoq	1.22489	0.968288	-9.23023	0.0835473	-0.125835	0.987638	-5.48042	0.431435	-0.18536	0.975541	-1.09121	0.928032	3.69031	0.644021	22.7248	2.46232e-06	0.93866	0.890456	-5.92441	0.260516	-2.53074	0.873071	-1.64962	0.935904	-0.0134749	0.999983	-0.179148	0.999778	2.27132	0.868995	-17.021	0.00578131	15.1126	0.791322	17.314	0.0104328
Adipor1	-0.151679	0.623036	-0.202121	0.202956	-0.114118	0.592105	0.144836	0.490047	-0.34727	0.00522973	-0.0212714	0.935621	-0.248424	0.185731	-0.0246313	0.989467	-0.0072365	0.972827	-0.0319017	0.871176	-0.0800297	0.856339	0.184394	0.453712	-0.00309375	0.999983	0.0375886	0.999778	0.15018	0.542424	-0.00455145	0.999992	0.0976116	0.999994	-0.0588988	0.999959
Adipor2	-0.1349	0.944508	-0.458441	0.35702	0.544022	0.30133	-0.192993	0.8279	-0.630434	0.0979394	0.614727	0.270211	0.17743	0.83416	-0.0285827	0.989467	-0.555984	0.219089	-0.180054	0.733317	-0.00684148	0.995311	-0.334178	0.722723	0.0482683	0.999983	0.0130449	0.999778	0.557533	0.370536	0.401203	0.999992	0.25985	0.999994	0.642634	0.999959
Adk	-0.50037	0.159512	0.0682935	0.892357	-0.412172	0.162223	-0.554929	0.041988	-0.312448	0.178678	-0.301811	0.364982	-0.194047	0.619497	-0.275807	0.709131	-0.06838	0.856178	-0.376351	0.135477	-0.118155	0.886371	0.0351914	0.994547	-0.0898353	0.999983	-0.125976	0.999778	-0.156306	0.766092	-0.0277418	0.999992	-0.0585897	0.999994	-0.183363	0.999959
Adm	1.31716	0.416428	2.57873	0.000198991	-1.1081	0.270652	0.370656	0.831342	2.965	1.22005e-06	1.13683	0.355671	0.234362	0.8907	-0.48312	0.926626	0.743269	0.434131	0.966394	0.276909	-0.240209	0.930937	0.19891	0.958785	0.237522	0.999983	0.637257	0.999778	1.01564	0.418817	0.908995	0.999992	0.0621829	0.999994	1.06827	0.999959
Adm2	0.209515	0.962707	0.803813	0.410815	1.05518	0.290221	-0.03216	0.99019	1.84102	0.00681234	1.41622	0.189264	-0.321776	0.855704	1.82508	0.289609	-0.875032	0.44551	-0.46883	0.660266	0.315966	0.921299	0.168942	0.979132	-1.04425	0.999983	-0.164044	0.999778	-2.82473	0.301626	1.30701	0.999992	0.907447	0.999994	0.598352	0.999959
Adnp2	-0.0704153	0.925686	-0.144189	0.563865	-0.233445	0.346224	-0.0202875	0.99019	-0.312392	0.0609545	-0.180642	0.489795	0.242073	0.44984	0.0956134	0.972047	0.126731	0.658474	0.240561	0.344802	0.413303	0.120469	-0.124035	0.849033	0.10401	0.999983	0.182679	0.999778	-0.122112	0.752175	-0.181907	0.999992	0.174377	0.999994	-0.010356	0.999959
Ado	-0.18267	0.625328	-0.150193	0.503715	-0.19716	0.394492	-0.187126	0.448678	-0.357362	0.0192766	-0.0372257	0.930745	-0.155757	0.59659	0.232822	0.598557	0.00744569	0.977103	-0.0876747	0.713891	0.237441	0.436966	-0.150775	0.708202	-0.0467229	0.999983	-0.0610752	0.999778	-0.396374	0.0521969	-0.0918261	0.999992	-0.032216	0.999994	0.0575803	0.999959
Adora1	-0.0521742	0.980345	0.106913	0.934452	0.416767	0.725854	-0.244642	0.887511	0.436414	0.582229	0.12728	0.930745	0.601306	0.654025	0.99074	0.684922	1.53286	0.100298	-0.936399	0.283372	-0.759864	0.682263	0.228163	0.952143	-0.161531	0.999983	-0.0802168	0.999778	-0.112296	0.981643	-0.0241075	0.999992	-0.0387151	0.999994	0.00952197	0.999959
Adora2a	0.29888	0.722	0.410029	0.27861	0.011665	0.984603	0.650999	0.123634	1.54969	2.67448e-09	0.235891	0.662271	-0.348014	0.705827	0.29566	0.901568	1.08048	0.0413884	0.356202	0.561202	-0.133502	0.934091	0.716553	0.329559	0.0412591	0.999983	0.145519	0.999778	-0.283865	0.616881	-0.00276638	0.999992	0.134046	0.999994	-0.0691374	0.999959
Adora2b	-0.386449	0.839333	0.802822	0.285352	0.00964012	0.992497	0.687948	0.462013	0.18098	0.834298	0.461011	0.641969	0.115402	0.960084	-2.51202	0.00055277	0.589354	0.506054	-0.893127	0.251953	-0.561703	0.727943	3.24515	1.6258e-06	-0.00563777	0.999983	0.128906	0.999778	-0.323122	0.842626	0.091446	0.999992	0.120797	0.999994	-0.108789	0.999959
Adpgk	0.0632873	0.945103	-0.131177	0.637046	-0.0797319	0.824777	0.12054	0.738823	-0.435115	0.0110924	0.311876	0.239062	-0.0786868	0.846397	-0.0967962	0.971211	-0.355844	0.100131	-0.100499	0.701626	-0.0730344	0.921284	-0.0450679	0.971645	0.132297	0.999983	0.0132838	0.999778	-0.316354	0.274261	-0.00885275	0.999992	0.145129	0.999994	0.0736802	0.999959
Adprh	0.0311228	0.971741	0.0322937	0.940314	-0.112755	0.792601	-0.172274	0.680224	0.349715	0.12286	0.437885	0.187552	-0.267199	0.447788	0.0345406	0.989467	-0.241789	0.397279	-0.196158	0.486822	0.0746002	0.938364	0.118015	0.901051	-0.06841	0.999983	0.0357796	0.999778	-0.18132	0.703841	-0.0108741	0.999992	-0.00622285	0.999994	0.0230515	0.999959
Adprm	-0.461885	0.503306	0.189946	0.72662	0.000211242	0.99982	-0.106825	0.902388	-0.378742	0.276473	-0.436686	0.365526	0.228574	0.714054	0.0603313	0.989467	-0.0474123	0.923048	-0.21511	0.623328	-0.230938	0.809597	-0.455851	0.438773	0.127078	0.999983	-0.0551244	0.999778	0.142638	0.890777	0.143961	0.999992	0.130456	0.999994	0.301063	0.999959
Adprs	0.250938	0.755437	-0.115163	0.832972	0.206522	0.675046	0.0890244	0.909789	0.55517	0.0474439	0.473779	0.259913	-0.400843	0.348825	0.00948281	0.992976	-0.448938	0.189788	-0.491336	0.127353	-0.0210032	0.992151	0.168297	0.873396	-0.141451	0.999983	0.0660971	0.999778	-0.444422	0.339802	-0.11249	0.999992	0.111346	0.999994	-0.354343	0.999959
Adra1a	-0.864175	0.337281	-0.354187	0.641503	0.1899	0.855143	0.063014	0.987745	-0.381662	0.495955	-0.927341	0.199512	0.205194	0.949731	0.801897	0.763786	-0.0192286	0.989542	0.287709	0.869702	-1.64075	0.130406	-0.00915226	0.997949	0.344554	0.999983	-0.137541	0.999778	0.258237	0.852641	0.351251	0.999992	0.0374882	0.999994	0.404165	0.999959
Adra1b	0.0592821	0.97851	-1.47391	0.0739701	0.4944	0.706563	-0.130965	0.963825	0.237426	0.777811	-0.056623	0.967409	-0.0383132	0.999876	-0.554029	0.822385	1.65289	0.0101154	0.329341	0.751703	-1.00605	0.281478	1.61854	0.0326958	-0.013208	0.999983	0.249437	0.999778	0.132625	0.940507	0.108389	0.999992	0.60535	0.999994	0.0835112	0.999959
Adra1d	0.353901	0.627572	-1.37358	1.98583e-06	0.0471639	0.960682	0.0625064	0.957254	-1.10815	7.0223e-05	-0.354108	0.431461	2.19574	0.387998	0.648779	0.891189	-0.502337	0.733554	2.30286	0.213055	-0.0943371	0.992151	-0.569451	0.89956	-0.298964	0.999983	-0.230739	0.999778	-0.0828321	0.940636	-0.203416	0.999992	0.20254	0.999994	-0.133315	0.999959
Adra2a	-0.32327	0.861684	-0.216029	0.843076	0.191412	0.87658	0.0804384	0.981062	-1.46594	0.00683369	1.28233	0.130644	0.44523	0.698248	0.071711	0.989467	-0.539067	0.474341	0.473276	0.510047	0.870354	0.409612	0.601738	0.612722	0.145604	0.999983	-0.40981	0.999778	-0.0611264	0.996583	0.150167	0.999992	0.486451	0.999994	0.0774055	0.999959
Adra2b	0.438005	0.936892	-0.704855	0.721117	1.09698	0.658657	-0.48349	0.854905	-1.18282	0.384092	0.748328	0.713525	0.0781411	0.999341	-0.0554944	0.989467	2.53286	0.0595064	0.132469	NA	-0.633454	0.792608	-0.59583	0.84503	-0.329775	0.999983	0.16634	0.999778	-0.251521	0.94695	0.0141742	0.999992	0.294987	0.999994	0.187981	0.999959
Adra2c	-0.109354	0.971741	-1.45634	0.115661	0.484328	0.717128	-1.23867	0.214477	-1.52587	0.0183308	1.4693	0.188664	-1.27844	0.401744	1.35157	0.512955	0.307565	0.823087	-0.588954	0.608787	-0.400319	0.886496	-1.10667	0.583574	-0.138569	0.999983	0.0442061	0.999778	-0.398537	0.727097	-0.159316	0.999992	-0.0329348	0.999994	0.320422	0.999959
Adrb1	0.573695	0.448879	-0.781746	0.060904	-0.718284	0.137422	-0.839745	0.0721068	-0.237537	0.596203	-0.547609	0.317979	-0.353138	0.823032	-0.0662581	0.989467	-0.209365	0.809942	-0.0352683	0.97099	-0.747073	0.463381	-0.0130516	0.996107	-0.21495	0.999983	-0.157172	0.999778	0.0570273	0.989187	-0.209794	0.999992	0.265536	0.999994	0.191393	0.999959
Adrb2	0.272613	0.801814	-0.48082	0.29398	-0.0605974	0.954446	0.177244	0.834652	-0.44826	0.236506	0.624138	0.237562	-0.593268	0.449419	0.377591	0.866268	0.341079	0.571735	-0.0686672	0.92084	-0.517078	0.573151	0.433059	0.681651	-0.33594	0.999983	0.065346	0.999778	-0.900565	0.0809975	0.11288	0.999992	-0.210593	0.999994	0.251016	0.999959
Adrb3	41.1383	7.68879e-96	-46.5234	1.34715e-124	38.0358	8.45302e-79	-9.27171	0.000124039	-0.819612	0.835125	-4.06204	0.234161	0.50377	0.923605	0.28532	0.989467	0.72056	0.814552	-0.103945	NA	-1.88906	0.688566	-0.188924	0.996107	0.1819	0.999983	29.3874	8.06468e-23	-12.1318	4.73352e-06	-0.0659564	0.999992	1.11042	0.999994	3.74198	0.999959
Adrm1	0.463412	0.441872	0.347894	0.378183	0.401738	0.340902	0.375476	0.409472	0.968589	0.000437775	0.380667	0.388024	0.173437	0.775314	0.23154	0.900825	-0.294028	0.442306	-0.170357	0.672727	-0.0464999	0.989928	-0.0298405	0.996107	-0.152259	0.999983	0.191738	0.999778	-0.0125554	0.996583	0.124611	0.999992	0.0106183	0.999994	-0.0459924	0.999959
Adsl	0.110022	0.916569	0.186368	0.631028	-0.134681	0.773857	-0.280203	0.486799	0.502142	0.0403835	0.278464	0.465789	-0.307083	0.436798	0.0203023	0.989467	-0.157162	0.661014	-0.33296	0.263672	0.0473996	0.981306	0.00479962	0.996554	0.241068	0.999983	-0.0156655	0.999778	-0.0425556	0.984376	-0.0709285	0.999992	0.0364312	0.999994	-0.191538	0.999959
Adss1	-0.148818	0.88009	-1.05112	9.65105e-05	0.174658	0.724755	-0.200481	0.709385	-1.3429	7.06897e-08	-0.0180937	0.972235	0.072772	0.973361	0.686366	0.497063	0.678525	0.181304	0.926761	0.0790982	-0.429709	0.621219	-0.39247	0.689177	-0.0419059	0.999983	0.0446474	0.999778	0.0466178	0.979294	0.00541187	0.999992	0.0331028	0.999994	0.192141	0.999959
Adss2	-0.117379	0.917988	0.687466	0.0175333	-0.241315	0.582862	-0.281145	0.527849	0.603702	0.0217351	-0.0296503	0.954712	-0.0858055	0.896031	0.442231	0.509888	-0.790969	0.00698898	-0.840612	0.00320338	0.123327	0.906778	-0.434144	0.329525	0.0440592	0.999983	-0.108031	0.999778	0.309273	0.535998	-0.125833	0.999992	-0.143758	0.999994	-0.108403	0.999959
Adtrp	-0.227823	0.901952	1.141	0.0177926	-0.871206	0.136262	-0.321208	0.75293	0.972768	0.0302137	0.719214	0.336717	-0.196049	0.743541	-0.449395	0.590032	-0.506524	0.159604	-0.667037	0.0454775	-0.186866	0.853081	0.40768	0.477319	-0.241347	0.999983	-0.440268	0.999778	-0.10515	0.933585	-0.472508	0.999992	0.115904	0.999994	-0.355968	0.999959
Aebp1	0.131117	0.94609	-0.285766	0.621688	1.35216	0.00214012	0.623933	0.230543	0.239309	0.598121	0.637201	0.249455	0.69254	0.216544	0.135638	0.989467	0.875079	0.0485607	0.848282	0.0524895	-0.743014	0.2182	-0.0223692	0.996107	-0.00137863	0.999983	-0.207728	0.999778	-0.155519	0.895749	0.096628	0.999992	-0.258643	0.999994	0.0136505	0.999959
Aebp2	-0.204439	0.623036	-0.157057	0.54155	-0.232129	0.36305	-0.191827	0.500488	-0.650417	5.95373e-05	-0.215102	0.414988	0.0191228	0.993492	-0.0801486	0.989234	0.359993	0.0963481	0.285581	0.201545	0.0740136	0.921084	0.0694925	0.932408	0.0550051	0.999983	-0.0714923	0.999778	0.50544	0.0243095	0.013046	0.999992	0.10149	0.999994	-0.00513771	0.999959
Aen	0.0707519	0.971741	0.285393	0.611872	0.187146	0.791229	-0.10098	0.927913	0.521042	0.168179	0.810327	0.140727	-0.110712	0.91077	-0.440512	0.739736	-0.0815809	0.889576	0.24258	0.63888	0.0652044	0.985811	0.507607	0.47891	-0.330884	0.999983	-0.065331	0.999778	-0.320639	0.696452	-0.0780059	0.999992	-0.0818263	0.999994	0.0434331	0.999959
Afap1	-0.417862	0.510305	-0.570236	0.0948542	0.0724221	0.919132	0.0447649	0.978907	-0.610513	0.0367721	-0.380908	0.388145	0.675514	0.145914	0.146746	0.984793	1.06639	0.00223035	1.11037	0.00294993	-0.825268	0.0440122	-0.382861	0.537957	0.0888021	0.999983	-0.013678	0.999778	0.246561	0.696452	0.148994	0.999992	0.123641	0.999994	0.216616	0.999959
Afap1l1	0.0251315	0.977846	-0.575446	0.0479265	-0.192816	0.669075	-0.0269867	0.99019	-0.501857	0.0536721	-0.237724	0.567643	0.136393	0.866857	0.143407	0.984793	0.867378	0.0132311	0.23235	0.614563	-0.511544	0.314658	-0.0954454	0.952747	0.0972012	0.999983	0.175911	0.999778	-0.0957984	0.920429	0.304959	0.999992	0.443408	0.999994	0.245702	0.999959
Afap1l2	-0.15635	0.932639	-0.529076	0.29936	-0.053406	0.960682	0.0866383	0.95141	-0.414442	0.339002	0.00797754	0.990641	0.29491	0.70627	0.33584	0.887161	-0.0609108	0.920917	-0.51883	0.296	-0.307971	0.792836	0.0185496	0.996107	-0.299608	0.999983	0.0415687	0.999778	-0.722597	0.227735	0.0475461	0.999992	-0.651855	0.999994	-0.347861	0.999959
Afdn	-0.275221	0.630778	-0.553688	0.0359255	-0.0704371	0.897568	-0.0164854	0.99019	-0.72332	0.00143292	-0.34084	0.336968	0.300051	0.423539	-0.178726	0.914993	0.308592	0.303781	0.32538	0.254112	0.0300871	0.992151	0.0938536	0.928766	0.179256	0.999983	0.0712228	0.999778	0.387895	0.313051	-0.0727791	0.999992	0.155288	0.999994	0.130303	0.999959
Aff1	-0.440985	0.547883	0.0407356	0.948714	0.623782	0.155987	0.39036	0.457681	-0.330217	0.369914	-0.230891	0.687657	0.675126	0.139107	-0.174884	0.972047	0.351835	0.413219	0.529514	0.169179	-0.024885	0.992151	0.135151	0.925438	-0.0776449	0.999983	-0.109344	0.999778	-0.0620494	0.976645	0.107604	0.999992	-0.248158	0.999994	-0.0516963	0.999959
Aff2	-0.891407	0.878381	-3.35471	0.0894285	1.60647	0.616943	-3.19221	0.123492	2.75168	0.13495	2.0082	0.461885	-1.46917	0.64564	0.658145	0.885417	1.70274	0.428036	0.442343	0.855774	0.250666	0.957355	-0.242213	0.958393	0.246569	0.999983	-0.00905324	0.999778	0.00724326	0.996583	-0.0726782	0.999992	-0.1818	0.999994	-0.056225	0.999959
Aff3	-0.487042	0.592976	-0.833681	0.062005	0.324747	0.624726	0.122844	0.911485	-1.21967	0.00111562	-0.0281375	0.97058	-0.0206838	0.999876	-0.083034	0.989467	2.05432	8.5913e-06	1.93305	0.000222576	-0.91508	0.138137	0.854644	0.173316	0.106946	0.999983	-0.0510457	0.999778	0.152298	0.902009	-0.0829556	0.999992	0.145979	0.999994	-0.0746007	0.999959
Aff4	-0.711261	0.283159	-0.228302	0.711435	0.208576	0.765028	-0.0338399	0.99019	-0.686377	0.0659037	-0.720206	0.196512	0.326678	0.618402	0.0995195	0.989467	0.273664	0.59998	0.46292	0.29769	0.0329653	0.992151	0.0982983	0.96468	0.146911	0.999983	-0.123904	0.999778	0.243475	0.789004	-0.0380604	0.999992	0.00929232	0.999994	0.0805296	0.999959
Afg1l	-0.0818929	0.959639	-0.351789	0.298935	0.168656	0.734117	-0.544004	0.110008	-0.416859	0.121612	0.00416762	0.993325	-0.148779	0.789415	0.414483	0.515687	-0.287236	0.388718	-0.308638	0.329905	0.120689	0.900549	-0.55388	0.135672	0.0934861	0.999983	-0.269494	0.999778	0.306527	0.50744	0.0645556	0.999992	0.237307	0.999994	-0.161132	0.999959
Afg3l2	-0.017623	0.977592	0.147288	0.582825	-0.0338285	0.946102	-0.320596	0.186945	0.0847029	0.715588	-0.114605	0.71656	0.228342	0.401585	0.243356	0.633274	-0.496987	0.0111813	0.115658	0.626148	0.216208	0.576361	-0.197858	0.600341	-0.0791334	0.999983	-0.0714242	0.999778	0.0912111	0.858444	-0.136171	0.999992	0.0834496	0.999994	0.10713	0.999959
Afm	-0.356626	NA	-0.563968	NA	-0.246079	NA	-1.08905	NA	3.31707	NA	-0.422816	NA	-0.00839018	NA	0.251146	NA	-0.503724	NA	-0.564054	NA	-0.102786	NA	-0.0533684	NA	-0.0246045	NA	-0.164027	0.999778	0.0588827	NA	-0.0480727	0.999992	-0.174324	NA	-0.289977	0.999959
Afmid	0.0321716	0.979689	-0.0702933	0.926619	0.323616	0.613391	0.135196	0.897421	0.614903	0.105366	0.19142	0.800844	-0.0759464	0.949615	0.437962	0.723952	-1.17695	0.00338325	-0.230138	0.634632	0.420208	0.606903	-0.438596	0.550846	-0.0304115	0.999983	0.10854	0.999778	-0.583535	0.430207	-0.0899414	0.999992	-0.0198793	0.999994	-0.42166	0.999959
Aftph	-0.0360713	0.971741	0.18415	0.351326	-0.178045	0.425927	-0.0463607	0.911485	-0.324293	0.0270052	-0.17034	0.453957	-0.0651916	0.842992	-0.0273468	0.989467	0.00189523	0.993839	-0.0610015	0.787955	-0.0550688	0.929346	-0.0222092	0.996107	0.0298913	0.999983	-0.0941532	0.999778	0.180015	0.510488	-0.0808262	0.999992	-0.0679766	0.999994	-0.0106434	0.999959
Aga	-0.175061	0.601777	0.176465	0.358009	-0.265694	0.167834	-0.211599	0.321795	-0.246673	0.0916324	0.14594	0.521343	-0.252105	0.286451	-0.0723718	0.984793	-0.0897462	0.702358	-0.515779	0.00296149	-0.0219303	0.992151	0.143741	0.721413	0.200913	0.999983	-0.157654	0.999778	-0.293883	0.185517	-0.0415405	0.999992	0.0231127	0.999994	0.0061974	0.999959
Agap1	-0.336194	0.604544	-0.49835	0.129804	0.117943	0.8381	0.175294	0.767058	-0.373862	0.203027	-0.448514	0.279026	0.406603	0.332903	-0.194389	0.930089	0.198902	0.614798	0.345693	0.30267	0.0474688	0.986502	0.324141	0.575421	-0.0786464	0.999983	-0.00489528	0.999778	0.019488	0.996583	-0.0583544	0.999992	-0.0374677	0.999994	-0.0156924	0.999959
Agap2	0.457406	0.74076	1.78061	0.000141186	0.449503	0.579372	0.509504	0.532346	2.32508	3.43778e-08	0.0796478	0.935398	0.232671	0.835364	-0.143633	0.989467	1.27005	0.0191528	1.08985	0.053139	-0.437905	0.722243	0.424497	0.731074	-0.178026	0.999983	-0.250804	0.999778	-0.0161428	0.996583	-0.0597239	0.999992	0.0987958	0.999994	0.0521318	0.999959
Agap3	0.285888	0.669815	-0.329763	0.352212	0.693339	0.0427989	0.594944	0.0835525	-0.0325983	0.939127	0.365252	0.358793	0.283279	0.54611	0.261475	0.844323	-0.213269	0.578011	0.192669	0.603432	-0.0540382	0.979276	0.0448812	0.992987	-0.231054	0.999983	-0.0130302	0.999778	-0.226987	0.687329	0.0583591	0.999992	-0.0223113	0.999994	-0.0295012	0.999959
Agbl1	0.605144	NA	-0.112469	NA	-2.95104	NA	1.08225	NA	1.16828	NA	-2.1627	NA	-0.00839078	NA	-2.72524	NA	-0.50376	NA	-0.564094	NA	-0.25044	NA	1.00766	NA	0.120639	0.999983	-1.16581	0.999778	-0.355634	NA	-1.16871	0.999992	0.844389	NA	1.07628	0.999959
Agbl2	-0.437998	0.58055	-0.455164	0.315327	0.361427	0.50475	0.113691	0.905088	-0.5389	0.130248	0.111096	0.893368	-0.0960842	0.946148	-0.473086	0.709131	0.765418	0.129179	-0.226005	0.709948	-0.210402	0.873071	0.281576	0.821273	0.203379	0.999983	0.341314	0.999778	0.31585	0.692792	-0.19365	0.999992	0.153756	0.999994	0.392671	0.999959
Agbl3	-0.678687	0.517777	0.0393681	0.96827	-0.444592	0.575641	-0.192379	0.877783	-1.1219	0.0194066	-0.39069	0.632497	-2.97994	0.0453491	-0.861549	0.796878	0.953912	0.335889	0.449637	0.825716	-0.322881	0.892159	-0.246142	0.938669	0.132141	0.999983	-0.268636	0.999778	1.19328	0.0801412	0.188273	0.999992	-0.547591	0.999994	-0.595752	0.999959
Agbl5	0.0611257	0.968737	-0.338958	0.207836	0.176615	0.649083	0.369356	0.249607	-0.0507142	0.88475	0.153881	0.686012	0.00424975	0.999876	0.480782	0.364245	-0.076969	0.87779	0.730867	0.0221502	0.221997	0.724081	-0.0284367	0.996107	0.233857	0.999983	0.00989696	0.999778	-0.106923	0.873392	-0.0366406	0.999992	0.032475	0.999994	0.0795694	0.999959
Ager	0.124457	0.971741	-0.859973	0.157734	0.765973	0.277809	0.536599	0.520658	-0.545946	0.325711	0.465077	0.566476	0.166104	0.949535	-0.687393	0.824222	-0.168547	0.882221	0.562465	0.551827	-0.783491	0.613464	1.0325	0.384374	0.251684	0.999983	-0.446392	0.999778	0.675661	0.818427	0.236737	0.999992	0.0300861	0.999994	1.01566	0.999959
Agfg1	-0.137831	0.917625	0.290638	0.525954	-0.0950461	0.89424	0.19757	0.768084	0.132852	0.755288	-0.312326	0.526797	0.137259	0.839937	0.438462	0.629636	-0.517001	0.169498	-0.174809	0.688607	0.157685	0.894128	-0.588993	0.22146	0.0287911	0.999983	-0.0906252	0.999778	0.240474	0.734878	0.120111	0.999992	0.134167	0.999994	0.0377374	0.999959
Agfg2	-0.0168499	0.983822	-0.0972041	0.848434	0.59569	0.0779665	0.265245	0.543597	0.225939	0.426222	0.169363	0.706189	0.264072	0.576764	0.161357	0.961044	0.370402	0.308678	-0.148357	0.7043	0.180859	0.828341	0.256209	0.704138	-0.17347	0.999983	0.0426352	0.999778	-0.309367	0.494367	0.0975207	0.999992	0.0653408	0.999994	-0.0789033	0.999959
Aggf1	-0.159335	0.513681	0.0204324	0.929303	-0.248125	0.0947876	-0.173361	0.289612	-0.281456	0.0100574	-0.149417	0.381555	-0.0311426	0.92746	-0.0808407	0.930089	0.167115	0.257029	0.138649	0.354313	-0.0505854	0.9152	-0.163842	0.453181	-0.0145638	0.999983	-0.0703841	0.999778	0.543973	3.51854e-06	-0.0447912	0.999992	0.00528379	0.999994	0.0889358	0.999959
Agk	-0.0996614	0.866316	0.274231	0.181855	0.034139	0.94517	-0.00502812	0.990682	0.401909	0.0122721	-0.352419	0.177719	0.415023	0.131595	0.207955	0.762025	0.291592	0.234234	0.353112	0.139359	0.276306	0.451113	-0.254106	0.502988	0.0594339	0.999983	-0.0747569	0.999778	0.281477	0.254493	0.024236	0.999992	0.138021	0.999994	-0.00883355	0.999959
Agl	-0.49681	0.608921	-0.0973396	0.907541	0.104704	0.917883	-0.0424784	0.99019	-0.466005	0.300552	-1.11185	0.059292	0.459439	0.519643	0.0950293	0.989467	0.637035	0.219901	1.05843	0.0286131	0.342338	0.765082	-0.169446	0.926697	0.244907	0.999983	-0.0328342	0.999778	0.184036	0.886955	-0.0716482	0.999992	0.00154309	0.999994	-0.198835	0.999959
Agmat	-1.65414	0.772998	0.0131835	0.994865	0.438448	0.900398	-0.127338	0.99019	1.13127	0.410823	0.850113	0.790517	0.421521	0.811296	0.562992	0.931616	-0.673995	0.540444	-0.410444	0.718839	0.296175	0.930085	-1.91524	0.0840656	-0.295386	0.999983	1.83042	0.999778	-3.26458	0.208373	0.796001	0.999992	1.03514	0.999994	-2.07094	0.999959
Agmo	0.63955	0.812118	-0.0164389	0.99241	-0.943896	0.509875	-1.26567	0.341452	-2.25022	0.0215405	-0.363353	0.84258	-0.408443	0.789415	-0.655876	0.865525	-0.728903	0.442495	-0.741463	0.407585	-0.572176	0.7826	-1.60592	0.11954	0.196617	0.999983	-0.110095	0.999778	0.297569	0.903504	0.2088	0.999992	-0.00592597	0.999994	-0.381687	0.999959
2002-08-01	-0.949198	0.23952	0.438558	0.516209	0.673141	0.312953	0.490997	0.525813	0.179939	0.781983	-0.669947	0.334822	0.707198	0.310987	0.105337	0.989467	0.560426	0.345794	1.24097	0.0155997	0.100549	0.973365	-0.182207	0.930262	0.2344	0.999983	-0.00778154	0.999778	0.0198384	0.996583	0.0702856	0.999992	0.209372	0.999994	0.20548	0.999959
2003-08-01	-0.851951	0.42977	-0.0180523	0.985995	0.37852	0.702782	-0.0481237	0.99019	-0.73764	0.186546	-0.573093	0.487747	0.718809	0.549401	-0.172452	0.989467	0.830776	0.291722	0.874224	0.333947	-0.18187	0.946965	0.3183	0.90463	0.177438	0.999983	-0.0952959	0.999778	0.277676	0.852527	0.273061	0.999992	0.174492	0.999994	0.492287	0.999959
2004-08-01	-0.486923	0.450812	-0.0398353	0.947238	0.119389	0.861397	0.0716645	0.947543	-0.472909	0.146172	-0.214057	0.696076	-0.079398	0.938215	-0.0175067	0.989467	0.758213	0.0460335	0.558471	0.152953	0.321206	0.684668	0.558308	0.295828	0.0457367	0.999983	-0.056601	0.999778	0.387936	0.502132	0.0617978	0.999992	0.129561	0.999994	0.0432808	0.999959
Agpat1	0.291962	0.726194	0.0227721	0.969144	0.547791	0.176023	0.604312	0.132993	0.600766	0.0476801	0.469268	0.297189	0.061122	0.952829	0.225757	0.915929	-0.726641	0.034576	-0.394264	0.271791	-0.249678	0.763945	-0.2971	0.680715	-0.208263	0.999983	-0.0426167	0.999778	-0.412579	0.434914	0.0471334	0.999992	-0.0345514	0.999994	0.000327224	0.999959
Agpat2	0.359394	0.761002	-0.628621	0.216729	0.34344	0.617239	-1.18157	0.0135373	-0.26637	0.595051	0.142295	0.881132	0.0111749	0.999876	0.0240611	0.989467	-1.13537	0.0115993	-0.833478	0.0646512	0.186894	0.908132	0.339216	0.755816	0.269345	0.999983	0.391866	0.999778	-0.0817004	0.978236	0.148837	0.999992	-0.356954	0.999994	-0.345891	0.999959
Agpat3	0.0536943	0.977118	-0.445141	0.565503	0.259839	0.796454	0.27497	0.822894	-0.191704	0.792786	0.18019	0.879437	0.509166	0.560582	0.782934	0.576938	-1.21198	0.0389391	-0.891397	0.127014	-0.356187	0.823656	-1.91447	0.000964242	-0.101603	0.999983	0.00300327	0.999778	-0.051263	0.996583	0.0287167	0.999992	0.0108778	0.999994	0.0141886	0.999959
Agpat4	0.222259	0.867612	-0.349741	0.531432	0.129755	0.879084	0.553652	0.328606	-0.158435	0.760676	0.297643	0.646295	0.609948	0.31303	-0.125936	0.989467	0.399809	0.466238	-1.20056	0.00587895	-1.08335	0.0389842	0.209866	0.907369	-0.136371	0.999983	0.059038	0.999778	0.0394264	0.996583	0.157955	0.999992	0.102707	0.999994	0.174584	0.999959
Agpat5	-0.204457	0.701102	-0.0209773	0.957477	-0.270144	0.360885	-0.239545	0.457681	-0.266264	0.214711	-0.0259169	0.948088	-0.266846	0.414498	0.0105982	0.989494	0.145267	0.620592	0.252499	0.324206	0.327331	0.382222	-0.315259	0.382693	0.126033	0.999983	-0.228204	0.999778	-0.0825665	0.895387	0.070689	0.999992	-0.196923	0.999994	0.0727606	0.999959
Agps	-0.61895	0.262443	0.226032	0.649148	0.0378278	0.960682	0.0812644	0.93492	-0.506669	0.114686	-0.257517	0.61953	-0.302002	0.577464	-0.0830835	0.989467	0.396756	0.31484	0.274797	0.494949	0.248761	0.778904	-0.0971463	0.952725	0.0873844	0.999983	-0.276474	0.999778	0.0103212	0.996583	0.0170808	0.999992	-0.0999801	0.999994	0.225676	0.999959
Agr2	-0.423261	0.931636	0.514522	0.782269	2.45998	0.0605841	-0.488906	0.848168	0.133236	0.936634	4.59211	2.36131e-05	-1.4141	0.304195	-0.630306	0.938936	-0.428887	0.765695	-0.0656526	0.9606	0.51797	0.879885	0.956895	0.656003	0.937189	0.999983	-0.164044	0.999778	0.0589012	0.996583	-0.0480762	0.999992	-0.174343	0.999994	-0.289998	0.999959
Agr3	2.58083	0.356179	6.31859	5.21717e-05	1.48462	0.31379	0.60802	0.80113	4.97793	1.20797e-05	0.898339	0.504755	-0.49443	0.70514	0.434919	0.94905	-0.293099	0.791882	-0.924407	NA	-0.279993	0.921084	0.446925	0.862141	-0.0246063	0.999983	2.86404	0.999778	3.1584	0.248189	-0.0480762	0.999992	-1.6193	0.999994	-0.289998	0.999959
Agrn	0.519973	0.207537	-0.260107	0.442713	0.116552	0.811298	0.67866	0.0184621	-0.325868	0.206961	-0.277355	0.457275	0.505988	0.133156	0.0857104	0.989467	-0.890801	0.000916165	0.273081	0.364212	0.229801	0.713579	-0.0550408	0.977572	0.15685	0.999983	0.106671	0.999778	-0.122688	0.865913	0.144565	0.999992	0.104937	0.999994	0.0481287	0.999959
Agt	-0.297965	0.91452	-1.90488	0.00649132	0.847418	0.38412	0.661727	0.556823	-2.26173	0.000300304	0.25665	0.85697	2.42748	0.00491776	0.934729	0.675282	0.887989	0.324673	-1.27666	0.112214	-1.20268	0.307129	-0.207782	0.957835	0.0691358	0.999983	0.0842748	0.999778	0.0129134	0.996583	0.329593	0.999992	0.105391	0.999994	0.0558364	0.999959
Agtpbp1	-0.137089	0.805814	0.0147413	0.966941	0.0594943	0.885325	0.0694086	0.885413	-0.450366	0.0108063	-0.291488	0.284381	0.0354561	0.97342	0.236266	0.740789	0.642854	0.00654855	0.394643	0.126506	-0.415718	0.160638	0.196666	0.69742	0.0271381	0.999983	-0.133556	0.999778	0.178519	0.60938	-0.0922447	0.999992	0.136643	0.999994	0.0519113	0.999959
Agtr1	-0.209317	0.887151	-0.380367	0.519157	0.280917	0.701874	-0.593343	0.316908	-1.10923	0.00434386	-0.244608	0.737478	0.27172	0.792995	0.0810433	0.989467	1.57061	0.00240712	0.550533	0.393728	-0.404521	0.719192	0.437276	0.69835	-0.141374	0.999983	0.06403	0.999778	-0.148682	0.962144	0.275306	0.999992	0.143825	0.999994	-0.0245772	0.999959
Agtr2	-0.230422	0.941263	0.272389	0.840676	-0.554991	0.611648	-1.34482	0.086389	-0.537418	0.460501	0.477516	0.652909	-0.897076	0.835364	-2.17826	0.739736	-0.439079	0.829985	0.419242	NA	-1.50071	0.622017	-0.474482	0.947113	0.0335857	0.999983	-0.160112	0.999778	-0.52822	0.721455	-0.11552	0.999992	-0.162598	0.999994	-0.458694	0.999959
Agxt	3.02261	NA	-0.968619	NA	2.31243	NA	-1.08911	NA	-0.131609	NA	2.94716	NA	-0.00839059	NA	0.251158	NA	-0.503748	NA	-0.564081	NA	-2.02067	NA	-0.0533709	NA	-0.0246057	NA	-0.164038	0.999778	0.0593539	NA	0.913697	0.999992	-1.53588	NA	1.58818	0.999959
Agxt2	-0.356626	NA	-0.563968	NA	-0.246079	NA	-1.08905	NA	0.309307	NA	-0.422816	NA	-0.00839018	NA	1.21287	NA	-0.503724	NA	-0.564054	NA	-0.102786	NA	-0.0533684	NA	-0.0246045	NA	-0.164027	0.999778	0.0588032	NA	-1.0098	0.999992	-0.174324	NA	-0.289977	0.999959
Ahctf1	-0.368159	0.571023	0.0421864	0.94002	0.24509	0.609574	0.157118	0.815637	-0.538632	0.0617039	-0.145674	0.791547	0.454834	0.284175	0.0570154	0.989467	0.448311	0.198696	0.701964	0.0280182	0.295209	0.676919	-0.0174694	0.996107	0.0931771	0.999983	-0.0919844	0.999778	0.344178	0.516986	0.106525	0.999992	-0.0686798	0.999994	0.10266	0.999959
Ahcy	0.187896	0.848954	-0.20538	0.662735	0.178444	0.743424	0.06531	0.950287	-0.295346	0.367812	0.182345	0.730004	0.0299543	0.993492	0.161108	0.967086	-0.710765	0.032165	-0.705298	0.0274926	-0.206593	0.817131	-0.441084	0.390631	-0.0657949	0.999983	0.0314201	0.999778	-0.180882	0.814552	-0.0666217	0.999992	-0.00411689	0.999994	-0.130764	0.999959
Ahcyl1	-0.179259	0.906223	-0.0403222	0.956293	-0.211398	0.769105	-0.679227	0.193916	-0.369171	0.388781	-0.313259	0.620198	0.236136	0.75802	0.714681	0.406127	-1.40384	0.000607246	-0.0746677	0.896362	0.522626	0.500579	-0.576189	0.38547	0.00377813	0.999983	0.0100681	0.999778	0.111188	0.939945	-0.0151135	0.999992	-0.128881	0.999994	-0.137303	0.999959
Ahcyl2	-0.583135	0.535015	-0.416263	0.497923	0.0630603	0.960682	0.0137685	0.99019	-0.777849	0.07219	-0.59359	0.352914	0.539362	0.411868	0.291153	0.935621	-0.933144	0.0564278	-0.17894	0.774055	0.12895	0.948687	-0.418769	0.679628	-0.0627876	0.999983	-0.0604366	0.999778	-0.0365988	0.996583	-0.0990764	0.999992	-0.127855	0.999994	-0.0648143	0.999959
Ahdc1	0.274006	0.831043	-0.160539	0.834316	0.811462	0.119196	0.572144	0.331813	0.0907682	0.888113	0.199419	0.793345	0.839145	0.120933	-0.001075	0.999447	-0.140097	0.831201	0.541859	0.255045	-0.102048	0.961597	0.00690858	0.997049	-0.059371	0.999983	0.149356	0.999778	-0.172162	0.892166	0.212455	0.999992	0.154836	0.999994	0.158769	0.999959
Ahi1	-0.591443	0.0866464	-0.350778	0.239567	-0.0406133	0.955079	-0.114776	0.842687	-0.737364	0.0010979	-0.0739578	0.899705	-0.105975	0.861056	0.33386	0.648716	0.841782	0.00236744	0.223524	0.520134	-0.596032	0.0841815	0.0729766	0.95749	0.232926	0.999983	0.0940159	0.999778	0.500639	0.132041	-0.0719268	0.999992	0.272742	0.999994	0.280885	0.999959
Ahnak	-0.255765	0.831884	-0.746269	0.0824233	0.0117915	0.986359	0.193449	0.827097	-1.27312	0.000280032	-0.813228	0.146381	0.338382	0.602871	-0.338854	0.863325	0.178932	0.753582	0.0361235	0.946763	-0.559471	0.429974	0.93284	0.0583056	0.172685	0.999983	0.0567064	0.999778	0.628603	0.288934	0.21006	0.999992	0.241455	0.999994	0.44052	0.999959
Ahnak2	0.331997	0.868944	0.586278	0.465902	0.391874	0.702749	0.969192	0.227683	0.962132	0.0988941	-0.324152	0.759573	0.79217	0.39998	0.431577	0.91734	1.06591	0.131634	-0.052976	0.951008	0.2562	0.9152	1.21393	0.151975	0.0114572	0.999983	-0.0444732	0.999778	0.421941	0.752436	-0.221618	0.999992	-0.695138	0.999994	0.313307	0.999959
Ahr	-0.618657	0.630778	-0.242028	0.806171	0.153401	0.900987	0.355015	0.749187	-0.27406	0.691369	-1.26394	0.111465	0.702174	0.400966	-0.022734	0.989799	0.668142	0.326752	0.876936	0.164808	0.185791	0.934754	-0.0151326	0.996107	-0.0297393	0.999983	0.149215	0.999778	-0.200534	0.909817	0.300574	0.999992	0.466555	0.999994	0.344754	0.999959
Ahrr	-0.0595549	0.973426	-1.18674	0.0321656	-1.05246	0.129788	0.326385	0.762605	-0.492629	0.381444	-0.559765	0.485456	-0.531192	0.535786	-0.698623	0.614468	1.01045	0.0848851	0.323685	0.647396	-0.580044	0.5992	0.393553	0.780308	-0.688454	0.999983	0.81765	0.999778	-1.28122	0.701688	1.12218	0.999992	-0.423867	0.999994	-0.302444	0.999959
Ahsa1	0.0832719	0.947322	-0.133717	0.743352	-0.0922218	0.856114	0.0341956	0.982111	0.266319	0.303995	0.38312	0.280243	-0.0146211	0.999876	0.0999075	0.989467	-0.216211	0.493837	-0.198543	0.516545	-0.0374114	0.989928	-0.150105	0.858652	-0.135663	0.999983	0.0459859	0.999778	0.207304	0.678733	-0.0136344	0.999992	0.0341892	0.999994	-0.104364	0.999959
Ahsg	-0.170687	0.956059	-1.20061	0.0391097	-0.0432806	0.969332	-0.0583065	0.99019	-1.80093	0.000252205	0.568774	0.481356	-0.566413	0.806012	1.68452	0.598557	0.551183	0.796027	3.59002	0.0452245	0.471015	0.928064	-2.06552	0.320165	0.0630023	0.999983	0.0146025	0.999778	-0.187682	0.960341	1.13679	0.999992	0.154229	0.999994	1.65388	0.999959
Aicda	7.43319	0.000284446	7.28273	7.18084e-05	0.924707	0.821348	4.09095	0.0774722	8.0277	3.92529e-06	0.446196	0.9304	2.7606	0.320864	2.83897	0.614064	5.13998	0.0170876	1.49353	0.526995	3.08995	0.418968	5.66929	0.0312874	38.2988	6.1601e-76	30.2375	8.13239e-25	29.9999	3.28608e-37	37.769	1.07714e-73	31.9043	8.20786e-28	-39.1211	5.99723e-80
Aida	0.366308	0.17432	0.423909	0.0180436	-0.340773	0.116738	0.322723	0.142407	0.604226	9.1294e-05	-0.18029	0.481695	-0.0219473	0.985501	-0.11391	0.940789	0.479517	0.0132026	-0.167542	0.44552	-0.170571	0.684053	-0.19465	0.602437	0.0931239	0.999983	-0.066589	0.999778	0.239263	0.403599	0.0205937	0.999992	-0.0967107	0.999994	-0.061352	0.999959
Aif1	1.91816	2.04341e-06	2.50711	1.98915e-11	-0.684127	0.224198	1.00429	0.0493097	2.88997	1.26598e-15	0.335936	0.626343	-0.296028	0.710101	-0.331844	0.89642	-0.133259	0.848873	-0.535213	0.2806	-0.223844	0.885232	0.716185	0.293311	0.38598	0.999983	0.00546625	0.999778	-0.00977976	0.996583	0.0288028	0.999992	0.0338407	0.999994	-0.408718	0.999959
Aif1l	-0.22827	0.800751	-0.297284	0.469938	-0.530796	0.176023	0.576038	0.158677	-0.652534	0.0241357	-0.0797181	0.920844	1.15574	0.521768	1.96795	0.402807	4.25782	0.0119251	0.686843	0.595543	-0.474047	0.851336	-1.07481	0.749331	0.117063	0.999983	0.0229088	0.999778	0.121481	0.895387	-0.15222	0.999992	-0.133243	0.999994	-0.129835	0.999959
Aifm1	-0.0495274	0.971741	0.190757	0.591183	-0.11418	0.807749	-0.65013	0.0180143	0.284391	0.255044	-0.174241	0.664936	0.384814	0.251141	0.00430454	0.995418	-0.437824	0.10569	0.145549	0.640659	0.0761982	0.940444	-0.37384	0.332146	-0.019535	0.999983	0.0125153	0.999778	0.187246	0.7167	-0.0663481	0.999992	0.00629103	0.999994	-0.0179939	0.999959
Aifm2	-0.120678	0.971741	-0.343273	0.677401	0.393447	0.654799	-1.11804	0.0885637	0.120477	0.884307	0.133456	0.922421	-0.0482015	0.997499	0.277455	0.967086	-1.00451	0.0881573	-0.624236	0.300632	-0.288906	0.873071	-0.890927	0.267563	-0.137055	0.999983	0.301936	0.999778	-0.0258922	0.996583	-0.0514178	0.999992	0.158871	0.999994	0.200563	0.999959
Aifm3	0.378915	0.8541	0.18044	0.857232	0.330156	0.849595	1.32156	0.202499	-1.12294	0.0344715	0.670619	0.573073	-0.741586	0.785416	-0.962676	0.903937	1.09015	0.589464	-2.39387	0.292133	0.22211	0.961145	1.10725	0.650753	-0.0761567	0.999983	0.0162049	0.999778	-0.49355	0.0541744	-0.0143459	0.999992	-0.321456	0.999994	-0.21203	0.999959
Aig1	-0.156078	0.787719	-0.607041	0.00250236	-0.439949	0.0814175	-0.266124	0.364421	-0.432164	0.0242261	0.116251	0.741915	-0.268109	0.444455	-0.276645	0.673051	-0.330851	0.211482	-0.475063	0.0504664	-0.385214	0.271832	0.249402	0.586169	-0.115876	0.999983	-0.0171902	0.999778	-0.268378	0.427684	0.124524	0.999992	-0.0604923	0.999994	-0.048986	0.999959
Aim2	-0.300995	0.874531	0.941846	0.137617	-0.257174	0.812778	0.654526	0.442509	0.916586	0.0924086	-0.402042	0.664539	-0.106251	0.964094	-0.138854	0.989467	-0.515857	0.499157	0.216876	0.818807	-0.752416	0.529698	-0.462889	0.784313	-0.326081	0.999983	-0.23116	0.999778	0.365486	0.807058	-0.357566	0.999992	1.31764	0.999994	-0.205636	0.999959
Aimp1	0.336273	0.601497	0.246138	0.5472	-0.56528	0.117233	-0.444246	0.257834	0.833913	0.00150972	0.308291	0.46867	-0.26054	0.589442	0.0925711	0.989467	-0.141061	0.736844	-0.310815	0.360058	0.0129457	0.992151	0.0876806	0.951212	-0.0310686	0.999983	-0.0427956	0.999778	0.274595	0.624287	-0.0713106	0.999992	0.0645634	0.999994	-0.10784	0.999959
Aimp2	0.0927829	0.961323	0.625999	0.0676665	0.0839705	0.904585	0.00212034	0.99726	1.10792	7.05579e-05	0.550735	0.225631	0.0975628	0.896134	-0.00503197	0.995582	0.115264	0.814362	0.0858054	0.855774	0.169538	0.875627	-0.0987035	0.947613	0.0593547	0.999983	0.00327052	0.999778	-0.15937	0.85431	0.0115999	0.999992	-0.00485754	0.999994	-0.0803452	0.999959
Aipl1	-2.09448	NA	-0.564004	NA	-0.246095	NA	-0.127337	NA	-0.652461	NA	-0.422843	NA	-0.00839072	NA	0.251162	NA	-0.503756	NA	-0.564091	NA	-0.102792	NA	-0.0533718	NA	0.0226254	NA	1.75067	0.999778	-2.11323	NA	0.291582	0.999992	0.106616	NA	-0.534309	0.999959
Aire	3.43544	0.0132843	3.90509	0.000106289	0.999988	0.553709	3.60082	0.00664144	5.40421	2.19323e-09	0.634641	0.755862	3.13328	0.0597478	-0.653764	0.963182	1.12981	0.45184	0.864439	NA	0.912249	0.795784	2.49613	0.206938	-0.341961	0.999983	0.516701	0.999778	-1.95242	0.270448	0.180362	0.999992	0.311853	0.999994	0.349832	0.999959
Ajap1	-0.21506	0.971741	5.20923	0.000856391	2.8198	0.199704	1.00009	0.555348	3.28263	5.22831e-06	-0.869287	0.59877	-0.023283	0.999876	0.278329	0.989467	-0.273098	0.882221	-2.95565	0.159043	0.272136	0.958355	-1.05666	0.842509	-0.0936794	0.999983	-0.110165	0.999778	0.669139	0.449127	0.145257	0.999992	0.0809431	0.999994	0.100128	0.999959
Ajm1	-0.158797	0.941263	-0.988725	0.0391348	0.565315	0.373927	0.0263246	0.99019	-1.43381	0.00045925	0.344913	0.635521	0.558745	0.688437	0.0418791	0.989467	-0.0556335	0.949829	-0.0262195	0.976754	0.00211621	0.998825	0.0280519	0.996107	-0.109488	0.999983	-0.0549705	0.999778	-0.198396	0.872778	0.0500948	0.999992	-0.120281	0.999994	-0.109581	0.999959
Ajuba	-0.01168	0.989839	0.00563652	0.99213	0.0655666	0.927978	0.149264	0.826442	0.418252	0.160635	0.324664	0.460362	0.124472	0.885968	0.364726	0.762944	0.203366	0.688247	0.147088	0.772735	-0.18372	0.873931	-0.0195397	0.996107	-0.0856085	0.999983	-0.198976	0.999778	-0.89061	0.0433232	0.0459629	0.999992	0.0447478	0.999994	-0.0315243	0.999959
Ak1	-0.299551	0.704441	-1.01376	0.000811797	0.513022	0.203628	-0.103821	0.896644	-0.832428	0.00364255	0.208773	0.688033	-0.229411	0.741995	0.751691	0.218803	0.496959	0.22481	-0.409826	0.318344	-1.01468	0.0158635	0.251894	0.796239	-0.132303	0.999983	0.0271912	0.999778	-0.139543	0.876899	0.0306956	0.999992	0.0886598	0.999994	-0.103805	0.999959
Ak2	0.15549	0.867409	0.7098	0.0129764	0.0150918	0.978336	-0.298116	0.493152	1.05221	1.95923e-05	0.279784	0.500352	0.148267	0.790176	0.146329	0.965958	0.0483374	0.903316	-0.00867319	0.981659	-0.128712	0.899181	-0.557186	0.145026	-0.0960294	0.999983	0.151933	0.999778	0.442317	0.324013	0.196272	0.999992	-0.0999844	0.999994	0.225441	0.999959
Ak3	-0.279629	0.709715	-0.628357	0.0480233	-0.262554	0.566276	-0.424143	0.303838	-0.978659	0.00023286	0.017931	0.973833	-0.395192	0.354196	-0.299348	0.800654	-0.420172	0.219991	-0.608076	0.0509132	-0.411509	0.454795	-0.515394	0.23773	-0.00214342	0.999983	-0.0932846	0.999778	0.0720897	0.952093	0.0118274	0.999992	-0.186357	0.999994	-0.00395225	0.999959
Ak4	-0.170554	0.971679	0.528348	0.616009	1.44039	0.114186	0.339479	0.835714	-0.103734	0.93298	1.40952	0.181775	-1.20355	0.263904	-1.0307	0.625555	0.161736	0.926365	-1.5535	0.117604	0.360397	0.90243	0.716393	0.744642	-0.247558	0.999983	0.120695	0.999778	0.0266965	0.996583	0.0640589	0.999992	0.0500175	0.999994	0.126377	0.999959
Ak5	-0.339999	0.938088	0.330763	0.784415	0.201216	0.928115	-1.13258	0.189257	3.34884	6.35373e-05	0.607537	0.71594	-1.30543	0.623732	0.874689	0.822114	-0.126574	0.929427	-3.42769	0.00456413	-3.44119	0.0588871	0.593906	0.846839	0.0495695	0.999983	-0.188835	0.999778	0.415479	0.478986	-0.000795443	0.999992	0.325561	0.999994	0.160704	0.999959
Ak6	-0.252939	0.653265	0.13556	0.727039	-0.12706	0.773335	-0.297311	0.401689	0.0568377	0.874412	0.331786	0.339731	-0.472142	0.167832	-0.012686	0.989467	0.244117	0.446775	-0.375506	0.21231	0.1555	0.840649	0.168062	0.833945	-0.0491071	0.999983	-0.0856589	0.999778	0.233828	0.621901	0.0152275	0.999992	-0.0326455	0.999994	0.0295995	0.999959
Ak7	0.0973747	0.966675	-0.331952	0.507707	-0.097344	0.902386	-0.138986	0.877368	-1.0288	0.00184827	0.28805	0.612659	1.84661	0.576893	0.251164	0.989467	0.386857	0.894869	-3.37954	0.0779421	-0.102793	0.992151	2.36382	0.48877	0.216314	0.999983	0.808882	0.999778	0.327004	0.674465	0.218308	0.999992	0.571327	0.999994	0.130145	0.999959
Ak8	0.41681	0.579996	-0.207917	0.699801	0.263742	0.626701	-0.0262742	0.99019	0.0421735	0.935701	0.225348	0.687268	2.73035	0.0629265	-1.06488	0.834108	0.60401	0.618542	0.768465	0.592361	-0.202328	0.952264	2.81006	0.267119	-0.0935977	0.999983	0.0584983	0.999778	0.201734	0.805166	-0.0716158	0.999992	0.301131	0.999994	0.138747	0.999959
Ak9	-0.153786	0.955035	-0.95001	0.0731892	0.314227	0.705663	-0.0139631	0.990682	-1.68726	0.0001067	-0.117307	0.923635	1.8448	0.582983	-0.710632	0.989467	1.9295	0.408924	0.3977	0.896427	-0.83308	0.856109	-0.0774999	0.996107	0.372683	0.999983	0.327677	0.999778	0.67707	0.397475	0.3838	0.999992	0.503202	0.999994	0.150245	0.999959
Akain1	-0.356651	0.971741	1.29283	0.682496	-0.246097	0.960682	-0.127338	0.99019	0.309329	0.93298	-0.422847	0.930745	-0.00839079	0.999876	-1.58855	0.891222	-0.50376	0.882221	-0.564095	0.855774	-0.102793	0.992151	0.908423	0.920284	-0.0993041	0.999983	-0.136703	0.999778	0.211428	0.842626	0.0941955	0.999992	-0.448065	0.999994	-0.294917	0.999959
Akap1	-0.189254	0.806905	-0.1827	0.647054	0.274183	0.483213	-0.318226	0.412971	-0.264034	0.339877	-0.107487	0.836546	0.244891	0.57351	0.0768127	0.989467	0.0880549	0.833643	0.535375	0.056538	0.0340854	0.992151	-0.321548	0.512783	0.0149742	0.999983	-0.0150523	0.999778	0.0409381	0.985228	0.0310557	0.999992	0.0350576	0.999994	0.193027	0.999959
Akap10	-0.212373	0.666147	-0.0255184	0.945924	-0.231516	0.438874	0.0260573	0.98717	-0.521708	0.00616975	-0.0777994	0.853478	-0.172571	0.64154	0.0195177	0.989467	0.130733	0.659457	-0.259414	0.303337	-0.12522	0.851436	0.176661	0.742074	-0.050319	0.999983	-0.0832491	0.999778	-0.193768	0.635116	-0.0744433	0.999992	-0.0766843	0.999994	0.170671	0.999959
Akap11	-0.534695	0.400309	0.173394	0.757057	-0.069893	0.933506	-0.0946996	0.919318	-0.306107	0.397534	-0.425742	0.376683	-0.193142	0.774121	-0.114043	0.989467	0.557145	0.150126	0.244488	0.57043	-0.0305636	0.992151	-0.0155166	0.996107	0.239074	0.999983	-0.226503	0.999778	0.236406	0.745942	-0.0827543	0.999992	0.117976	0.999994	0.078788	0.999959
Akap12	-0.206244	0.885867	-0.614964	0.202736	-0.240219	0.73968	0.354778	0.608375	-0.718171	0.0695789	-0.618411	0.28707	0.210153	0.819741	-0.131901	0.989467	1.05186	0.0196504	1.4521	0.00112281	-0.858453	0.150237	-0.121721	0.953662	-0.105933	0.999983	0.127283	0.999778	-0.141083	0.911908	-0.0664818	0.999992	-0.394741	0.999994	-0.263671	0.999959
Akap13	-0.387089	0.620568	-0.111933	0.873805	0.486069	0.291965	0.34241	0.530192	-0.319318	0.385009	-0.347719	0.492421	0.322831	0.568359	0.0759763	0.989467	0.752243	0.0457793	0.516968	0.17625	0.0650145	0.979699	0.613715	0.224501	0.141042	0.999983	-0.0668083	0.999778	0.2512	0.738125	0.148438	0.999992	0.368851	0.999994	0.243672	0.999959
Akap14	-0.380509	0.852321	-0.249354	0.83013	-0.275182	0.815363	-0.959466	0.274607	-0.939647	0.139269	-0.357374	0.736564	-3.13435	0.199043	0.24629	0.989467	-0.50376	0.882221	-0.564095	NA	1.90659	0.555009	-0.0533722	0.996107	0.250748	0.999983	0.909555	0.999778	0.938687	0.39276	0.762556	0.999992	0.395345	0.999994	0.692995	0.999959
Akap17a	1.54855	0.674572	2.34718	0.0598366	2.62156	0.0896123	1.31899	0.528311	0.974894	0.412481	0.546817	0.816117	1.1231	0.574411	0.471484	0.989467	-0.449059	0.791981	0.407708	NA	-0.862372	0.774875	0.0335768	0.996107	-0.826122	0.999983	-0.230565	0.999778	-1.9844	0.419874	0.0688351	0.999992	-0.881533	0.999994	-0.990253	0.999959
Akap3	-0.0563384	0.971741	-0.0921947	0.84397	0.109207	0.821791	0.441619	0.168125	0.057544	0.875501	0.162391	0.697788	0.0219597	0.999876	-0.399039	0.556068	0.0818384	0.862875	0.219152	0.553802	0.298016	0.588831	0.137721	0.902808	-0.0889742	0.999983	-0.0192948	0.999778	0.322931	0.46606	-0.233994	0.999992	0.0974494	0.999994	-0.0685434	0.999959
Akap4	-0.356626	NA	-0.563968	NA	-0.246079	NA	-0.127328	NA	0.309307	NA	-0.422816	NA	-0.00839018	NA	0.251146	NA	1.57037	NA	-0.564054	NA	-0.102786	NA	-0.0533684	NA	-0.0246045	NA	-0.164027	0.999778	0.0587437	NA	-0.0480727	0.999992	-0.174324	NA	-0.289977	0.999959
Akap5	-0.133935	0.954371	-0.476352	0.377884	0.0955728	0.923004	-0.132667	0.902882	-1.0027	0.0102464	0.0445667	0.954293	-0.639528	0.386533	0.147285	0.989467	1.0257	0.043023	-0.00444572	0.994597	-1.7931	0.000206191	0.266524	0.867507	0.161405	0.999983	-0.441092	0.999778	0.341414	0.689861	-0.0519327	0.999992	0.283593	0.999994	0.0796565	0.999959
Akap6	-0.0684728	0.971741	-0.0998074	0.918584	-0.599386	0.396223	0.234158	0.839106	-0.232005	0.710881	-1.0158	0.158037	0.0791174	0.974076	0.271486	0.96582	0.876001	0.143352	0.841901	0.165833	-0.67185	0.498068	-0.572426	0.586734	0.179138	0.999983	-0.151488	0.999778	0.347036	0.748114	-0.0763725	0.999992	0.142684	0.999994	-0.00291537	0.999959
Akap7	-0.372838	0.547883	0.0838048	0.896848	-0.44619	0.246039	-0.407922	0.322387	0.0444777	0.93298	-0.135101	0.806926	-0.601731	0.111894	0.502844	0.446416	0.0764853	0.879379	-0.813447	0.00743889	-0.139049	0.895756	-0.134171	0.912677	0.171815	0.999983	-0.223573	0.999778	-0.193872	0.771614	-0.0411101	0.999992	-0.186456	0.999994	-0.197645	0.999959
Akap8	0.0891345	0.869621	0.0421565	0.90176	0.381149	0.0580831	0.137426	0.617304	-0.0478049	0.833314	0.185118	0.430527	0.2956	0.226689	0.115856	0.920994	0.32352	0.0924384	0.488526	0.00760295	0.0576999	0.930754	0.0111293	0.996107	-0.061989	0.999983	0.183595	0.999778	0.285847	0.253353	0.12383	0.999992	0.209388	0.999994	0.154579	0.999959
Akap8l	0.369265	0.290676	-0.488518	0.0202162	0.0281823	0.960682	-0.0498639	0.935611	-0.684005	0.000153156	-0.105819	0.771075	0.231279	0.533543	-0.023254	0.989467	0.0548504	0.882221	-0.00965448	0.975421	-0.549171	0.0434955	-0.111115	0.901051	-0.0951218	0.999983	-0.014364	0.999778	0.0953023	0.869149	0.0186791	0.999992	0.0310378	0.999994	-0.154287	0.999959
Akip1	0.264375	0.629122	-0.129987	0.738875	-0.389219	0.204066	-0.115458	0.831514	0.115453	0.693186	0.00191146	0.996633	-0.00807758	0.999876	0.344863	0.58328	-0.478894	0.0767775	-0.446653	0.0881718	0.0266957	0.992151	0.258008	0.606253	0.043843	0.999983	-0.0570439	0.999778	0.231712	0.628724	-0.0643813	0.999992	0.0144927	0.999994	-0.39934	0.999959
Akirin1	-0.143801	0.801251	0.246921	0.306703	-0.29532	0.2513	-0.139544	0.69728	-0.173032	0.409566	0.0715369	0.85915	-0.108648	0.785293	-0.00445988	0.994792	-0.00157554	0.996055	-0.212037	0.363189	-0.04774	0.962372	0.130382	0.832198	0.0911548	0.999983	-0.201246	0.999778	0.313349	0.290046	-0.00298403	0.999992	0.0929459	0.999994	0.00931896	0.999959
Akirin2	0.0344325	0.971741	-0.10312	0.696573	-0.381864	0.0658828	-0.305791	0.156538	-0.389882	0.0128307	0.0328451	0.930745	-0.207313	0.435351	0.0641282	0.989467	0.0178326	0.944727	-0.508394	0.00581831	-0.16664	0.68277	0.195186	0.575272	-0.0212186	0.999983	-0.175404	0.999778	0.154939	0.640717	0.00975174	0.999992	-0.0547062	0.999994	0.0726352	0.999959
Akna	0.381001	0.78507	1.03468	0.0477881	0.591393	0.388909	1.10074	0.0606032	1.45713	0.000968543	0.0198905	0.982601	-0.159481	0.891049	-0.334627	0.927257	1.24897	0.0185385	1.33976	0.0104931	-0.200006	0.920159	1.00532	0.141231	0.00520614	0.999983	0.266664	0.999778	-0.107258	0.962762	0.319701	0.999992	0.0212886	0.999994	-0.328517	0.999959
Aknad1	1.32405	NA	-1.62052	NA	-0.242738	NA	2.9083	NA	-0.372226	0.876477	-0.287416	NA	-1.07289	NA	0.06871	0.989787	1.41934	NA	-2.47347	NA	-0.579589	NA	-1.10533	NA	-0.0246063	0.999983	1.27953	0.999778	-0.903165	NA	-0.0480761	0.999992	-0.174343	NA	-1.25179	0.999959
Akr1a1	0.220648	0.768426	-0.0185893	0.970625	-0.181937	0.691458	-0.163954	0.765501	0.318713	0.251127	0.342398	0.376923	-0.318883	0.427623	0.144549	0.965739	-0.730662	0.0103614	-0.518496	0.070853	-0.154217	0.860963	-0.163297	0.856863	-0.0750356	0.999983	-0.0243634	0.999778	-0.187733	0.752436	-0.0565466	0.999992	0.086968	0.999994	8.74341e-05	0.999977
Akr1b10	-0.623697	0.970491	5.18448	0.00966414	2.17065	0.577632	-0.127338	0.99019	7.44658	7.71266e-05	4.24229	0.221817	-0.613928	0.883289	3.48425	0.35979	-3.88434	0.0538552	-0.568668	0.836549	2.2047	0.568073	0.905604	0.905194	-0.988121	0.999983	-1.75185	0.999778	0.599372	0.93075	1.45809	0.999992	0.520525	0.999994	2.32692	0.999959
Akr1d1	-0.0480813	NA	3.36686	0.0766404	0.781144	NA	-0.0565342	0.99019	3.05131	0.0677384	1.09062	NA	-0.00839078	NA	1.21296	0.984793	-0.50376	NA	-1.52589	NA	-0.102793	NA	0.908422	NA	-0.0246063	0.999983	-0.161384	0.999778	-4.61003	0.144339	1.87292	0.999992	-1.67888	0.999994	-2.08443	0.999959
Akr1e2	0.309709	0.769607	-0.299767	0.591633	-0.519361	0.308527	-0.43357	0.454986	-0.491917	0.201957	0.0833717	0.930745	-0.331557	0.58717	-0.282338	0.895425	-0.684286	0.0975826	-0.673877	0.088597	-0.281958	0.774498	0.233171	0.844209	0.177585	0.999983	0.230339	0.999778	-0.28105	0.747664	0.199409	0.999992	0.312887	0.999994	0.0180692	0.999959
Akt1	-0.0539977	0.971741	-0.174447	0.642835	0.427797	0.176924	0.597964	0.0405477	0.190772	0.490684	0.2138	0.577589	0.129073	0.801346	0.37395	0.553799	0.0120371	0.974393	0.372368	0.176093	0.269574	0.627533	-0.221126	0.708116	-0.191443	0.999983	0.0475065	0.999778	-0.170683	0.757793	0.0505808	0.999992	0.058628	0.999994	0.0453277	0.999959
Akt1s1	0.365708	0.594242	-0.151505	0.772095	0.510692	0.195226	0.240191	0.66361	0.281461	0.390342	0.601751	0.174034	0.191911	0.747918	0.269753	0.861323	-0.456031	0.203076	-0.564946	0.0918894	0.00743048	0.994818	-0.0604086	0.98292	-0.233674	0.999983	0.203173	0.999778	-0.0683727	0.96113	-0.0244159	0.999992	-0.147215	0.999994	-0.0318921	0.999959
Akt2	0.109192	0.92049	-0.00967054	0.98456	0.228276	0.58504	-0.0373746	0.980874	0.551124	0.0278604	0.129857	0.790466	-0.0883233	0.88572	-0.0273536	0.989467	-0.117832	0.765695	-0.0128853	0.971533	-0.0469612	0.982555	0.0664867	0.966551	-0.232849	0.999983	-0.00611874	0.999778	-0.576799	0.10113	0.106713	0.999992	-0.110591	0.999994	-0.00294434	0.999959
Akt3	-0.568115	0.27452	-0.521832	0.132592	0.293604	0.525468	-0.06692	0.947538	-0.628596	0.030096	-0.0917419	0.898479	0.0260684	0.999876	0.209913	0.930089	1.41668	1.52545e-05	0.302325	0.444208	-0.535769	0.291802	0.258925	0.747114	0.0550117	0.999983	-0.211178	0.999778	0.321184	0.565586	-0.101086	0.999992	0.0722435	0.999994	0.0962887	0.999959
Alad	0.29162	0.792729	-0.165906	0.805955	0.42412	0.44256	-0.0532292	0.98121	0.530112	0.164152	0.514818	0.346676	-0.104852	0.912114	0.0660879	0.989467	-0.533773	0.22782	-0.579426	0.164259	-0.241273	0.834776	-0.451344	0.52878	-0.263008	0.999983	0.0952566	0.999778	-0.796906	0.133302	-0.0544331	0.999992	-0.0241752	0.999994	0.24369	0.999959
Alas1	0.00186902	0.998819	-0.548712	0.170111	1.26775	0.00101843	0.369603	0.490395	-1.45468	1.50795e-06	1.33314	0.000278746	0.0657986	0.954194	0.183696	0.96582	-0.633745	0.102418	-0.278948	0.511103	0.22769	0.824725	0.159175	0.912196	-0.00623037	0.999983	0.0100266	0.999778	0.0931082	0.943184	-0.0541792	0.999992	0.10623	0.999994	-0.0414472	0.999959
Alas2	-0.279077	0.912199	-1.30473	0.0596448	-0.316467	0.789206	-0.532204	0.628676	-0.110681	0.922136	0.0100634	0.992958	-1.29403	0.142355	0.257446	0.989467	-0.510679	0.54774	-0.205376	0.839195	0.151235	0.965048	0.273231	0.920284	0.228173	0.999983	0.286127	0.999778	-0.532638	0.682542	0.190676	0.999992	-0.296032	0.999994	0.517877	0.999959
Alb	-0.0550878	0.985685	-1.81975	0.0980434	1.28822	0.349281	-2.88946	0.00827866	-1.65589	0.0863573	-0.882386	0.583997	-1.60924	0.343973	0.475279	0.989467	0.0181989	0.9923	1.17341	NA	-0.55119	0.921084	0.643204	0.884604	-0.042849	0.999983	-1.6721	0.999778	-0.373347	0.923761	-0.0206547	0.999992	-1.64459	0.999994	-0.154671	0.999959
Alcam	-0.269034	0.66579	-0.635215	0.0187264	-0.348277	0.327277	-0.144286	0.798919	-1.66899	3.23029e-14	-0.450109	0.226746	-0.289056	0.500583	-0.0634419	0.989467	0.350649	0.268089	-0.0469562	0.902982	0.0333456	0.992151	-0.312414	0.541203	0.362738	0.999983	-0.317641	0.999778	0.412319	0.302439	0.00851273	0.999992	0.138018	0.999994	0.0700774	0.999959
Aldh16a1	0.618108	0.588477	0.811156	0.171581	0.837293	0.208086	0.85061	0.217271	1.19141	0.0122942	0.47544	0.542029	0.528704	0.509411	0.109143	0.989467	-0.745906	0.203792	-0.184846	0.799961	0.0143599	0.994283	-0.340862	0.824505	-0.18101	0.999983	-0.279168	0.999778	-0.451601	0.669869	0.262403	0.999992	0.00153785	0.999994	-0.304788	0.999959
Aldh18a1	-0.157424	0.912474	0.641827	0.11419	0.202493	0.756715	0.0304107	0.99019	0.97753	0.00315524	0.0326764	0.961731	0.395084	0.47224	-0.103934	0.989467	-0.272617	0.561963	0.167167	0.73052	-0.355155	0.671222	-0.909007	0.0383058	-0.0139046	0.999983	0.0784666	0.999778	-0.163391	0.877055	0.0595405	0.999992	0.0948338	0.999994	0.238487	0.999959
Aldh1a2	-0.0200899	0.980345	-0.605467	0.0282232	-0.234535	0.564681	0.15957	0.765731	-0.472564	0.0626292	-0.224232	0.583566	0.363092	0.377495	0.201452	0.90477	0.83099	0.00386857	-0.126065	0.747986	-0.865649	0.0064927	0.348607	0.48877	0.271575	0.999983	-0.105832	0.999778	-0.000849338	0.999429	0.152988	0.999992	0.138504	0.999994	-0.0923765	0.999959
Aldh1a3	-0.366387	0.866316	0.0796386	0.947238	0.485148	0.652714	-0.171698	0.929324	0.826198	0.214005	0.462008	0.666228	0.911819	0.327768	-0.00168418	0.999447	0.800428	0.303256	0.387118	0.644671	-0.537138	0.745107	0.261031	0.923719	-1.4309	0.784148	0.860889	0.999778	-1.33236	0.163334	0.110088	0.999992	1.49499	0.999994	-0.0622808	0.999959
Aldh1b1	0.095963	0.971741	0.589799	0.327159	0.0060021	0.993767	0.457107	0.569704	0.483881	0.330265	0.429851	0.577994	-0.0590845	0.979893	-0.58462	0.638317	0.497588	0.355322	0.500508	0.327023	-0.0680543	0.989527	0.411593	0.686558	0.0556602	0.999983	-0.0879999	0.999778	-0.0908622	0.968351	-0.057929	0.999992	0.0816116	0.999994	0.381566	0.999959
Aldh1l1	-0.154007	0.96685	2.16193	5.18346e-05	1.02099	0.160866	-0.121082	0.951541	2.1396	2.18596e-05	0.248268	0.82322	-1.49791	0.0369506	-0.566835	0.841767	0.38994	0.660714	-0.141622	0.862571	0.458642	0.77549	1.19584	0.151975	0.000412238	0.999983	0.105175	0.999778	-0.0832712	0.988817	0.156081	0.999992	0.202715	0.999994	0.0194297	0.999959
Aldh1l2	-0.138699	0.971741	0.260418	0.884563	-0.0811794	0.962952	-0.452366	0.809275	0.244605	0.839373	0.0457966	0.977039	-0.611924	0.704312	0.418338	0.987555	-0.51619	0.705326	-1.7774	0.102478	0.728009	0.755928	1.29669	0.378315	-0.113908	0.999983	-0.023636	0.999778	0.334166	0.894892	-0.0359333	0.999992	0.0442784	0.999994	0.132906	0.999959
Aldh2	0.208481	0.855397	-1.24499	0.000223045	0.655692	0.140698	0.245174	0.71316	-1.18708	0.000184117	0.320127	0.552517	0.42253	0.419109	0.452032	0.662728	-0.678721	0.0839009	-0.436744	0.274939	-0.213769	0.84717	-0.594412	0.267563	-0.123728	0.999983	0.0268045	0.999778	-0.379026	0.557063	0.0272156	0.999992	-0.0269413	0.999994	-0.0438111	0.999959
Aldh3a1	0.410863	0.814894	-3.00886	1.56624e-07	3.28551	8.18775e-10	0.458554	0.667007	-2.64371	7.80699e-06	2.9051	1.97065e-07	2.67619	0.272088	1.01208	0.922919	2.90221	0.149136	0.417383	0.822023	-0.115878	0.992151	0.536306	0.91362	0.23573	0.999983	-0.195079	0.999778	0.919212	0.36402	0.524287	0.999992	-0.000364886	0.999994	0.371441	0.999959
Aldh3a2	-0.336845	0.718594	-0.367699	0.445965	0.206146	0.749492	-0.0343315	0.99019	-0.833177	0.0139281	-0.0893887	0.922626	0.430271	0.421981	-0.532185	0.569748	0.0966774	0.874466	-0.154436	0.757598	-0.350144	0.681794	-0.345812	0.670163	0.021345	0.999983	-0.0893085	0.999778	0.0574854	0.984486	-0.0194595	0.999992	0.0229563	0.999994	0.101694	0.999959
Aldh3b1	0.324484	0.828006	0.0503454	0.955323	0.404721	0.598375	0.246572	0.823121	-0.0220438	0.971574	0.471407	0.515986	-0.0937677	0.952475	0.234732	0.977373	-0.86285	0.110786	-0.93092	0.0696282	-0.360116	0.784237	-0.534592	0.580143	-0.126684	0.999983	0.0930883	0.999778	-0.764961	0.371401	0.351192	0.999992	0.306537	0.999994	-0.423987	0.999959
Aldh4a1	0.0406441	0.976612	-0.615415	0.190421	0.255182	0.714805	0.141344	0.890592	-1.13659	0.00210178	-0.127623	0.888944	0.134394	0.90687	0.363943	0.873702	0.63276	0.238444	-0.718163	0.162085	-1.2306	0.0247565	0.437967	0.643921	-0.111281	0.999983	-0.0652142	0.999778	-0.244292	0.797001	0.0587518	0.999992	0.187525	0.999994	-0.050914	0.999959
Aldh5a1	-0.26497	0.828889	-0.669498	0.140747	-0.174005	0.822184	-0.712649	0.165878	-0.895673	0.0169579	-0.575876	0.310571	0.495969	0.392916	0.42638	0.764648	-0.653295	0.145187	-0.207928	0.692683	-0.314186	0.759999	-1.01321	0.0361637	0.110228	0.999983	-0.0389357	0.999778	0.156569	0.895387	-0.0975711	0.999992	-0.0699206	0.999994	-0.0295994	0.999959
Aldh6a1	-0.349938	0.48097	-0.629103	0.0126603	0.00869465	0.984656	-0.0603935	0.935615	-1.26501	2.42632e-09	-0.393742	0.26141	-0.254193	0.521768	-0.279147	0.740829	0.264718	0.386673	0.00357208	0.991342	-0.170191	0.810531	-0.0934932	0.928459	0.131146	0.999983	-0.154587	0.999778	0.400391	0.280435	-0.0009891	0.999992	0.102812	0.999994	0.0521832	0.999959
Aldh7a1	-0.0928561	0.875203	-0.36872	0.0491597	-0.35031	0.109146	-0.534541	0.00440881	-0.543878	0.000546175	-0.258057	0.298337	0.099763	0.808871	0.356424	0.357765	-0.224267	0.337057	0.167655	0.485414	-0.14048	0.780881	-0.128204	0.828112	0.0259733	0.999983	-0.12252	0.999778	0.366876	0.112541	-0.127475	0.999992	-0.102982	0.999994	-0.109152	0.999959
Aldh8a1	-0.756648	NA	2.13945	NA	-3.36122	NA	-0.680016	NA	-1.43573	NA	2.11437	NA	-0.00839076	NA	1.6882	NA	-0.503758	NA	1.58331	NA	-2.6231	NA	-1.01516	NA	1.83842	NA	-1.57668	0.999778	2.22034	NA	-0.048076	0.999992	-0.360654	NA	-1.25179	0.999959
Aldh9a1	0.191509	0.786997	0.0392014	0.933937	-0.224522	0.55489	0.0644888	0.92943	-0.148073	0.610277	0.0202173	0.965477	-0.151084	0.749082	-0.691165	0.0457488	0.180649	0.582393	-0.12408	0.709948	-0.340358	0.462259	0.077533	0.947113	-0.0191152	0.999983	0.0709866	0.999778	0.344201	0.404508	-0.0820461	0.999992	0.0190251	0.999994	-0.0566727	0.999959
Aldoa	0.248163	0.729303	0.268278	0.463572	0.415211	0.247035	0.168338	0.758729	0.830668	0.000750382	0.204999	0.640087	-0.17567	0.73183	0.0239622	0.989467	0.0282711	0.943442	-0.266707	0.406183	-0.151569	0.869444	0.0722716	0.960702	-0.128266	0.999983	0.122148	0.999778	-0.394227	0.357332	-0.062816	0.999992	0.0704487	0.999994	0.00612432	0.999959
Aldob	-0.18437	0.952126	-1.46593	0.0134956	0.489732	0.586604	-0.274297	0.832052	-2.26739	1.49662e-05	0.45655	0.613062	-0.0173528	0.999876	-0.350418	0.936029	-0.488198	0.469464	-0.414597	0.532032	-0.576841	0.632909	-0.505443	0.679239	0.581041	0.999983	-0.0169552	0.999778	0.324535	0.867787	0.454086	0.999992	0.545775	0.999994	-0.0173465	0.999959
Aldoc	0.473705	0.629548	-0.675573	0.16271	0.403562	0.515991	0.39408	0.571477	-0.945439	0.0108155	0.6234	0.323268	-0.138783	0.94446	0.00222615	0.999129	1.0588	0.135463	0.854991	0.295812	-1.23299	0.109379	0.611957	0.611269	-0.162724	0.999983	0.109288	0.999778	-0.361629	0.50643	0.0393974	0.999992	-0.066942	0.999994	-0.0821619	0.999959
Alg1	0.35103	0.547883	-0.254531	0.494345	0.288037	0.471582	0.10375	0.880017	-0.163368	0.608675	0.381565	0.326927	-0.468481	0.240489	-0.0147292	0.989467	-0.529168	0.10843	-0.482068	0.125566	0.398827	0.450413	0.0822174	0.955845	-0.106154	0.999983	0.127133	0.999778	-0.959711	0.00336989	-0.00155335	0.999992	-0.175749	0.999994	0.0259309	0.999959
Alg11	-0.410664	0.352327	0.0190826	0.966912	-0.249271	0.494023	-0.0480807	0.957173	-0.694377	0.00190376	-0.195907	0.613446	0.0653091	0.920954	-0.183004	0.905947	0.110966	0.764467	-0.115253	0.738645	0.0200504	0.992151	-0.00110584	0.998475	0.0878885	0.999983	-0.07089	0.999778	0.31263	0.453991	0.00560979	0.999992	-0.0952041	0.999994	-0.145867	0.999959
Alg12	0.0513357	0.962707	0.244187	0.271911	-0.0344225	0.943457	0.0238072	0.985568	0.392311	0.0206448	0.339637	0.201721	-0.128415	0.7038	-0.288699	0.512955	-0.30219	0.156927	0.345205	0.0873838	0.189377	0.65346	0.0433733	0.97136	-0.0996345	0.999983	0.175325	0.999778	-0.0748796	0.895387	0.0248267	0.999992	-0.0676589	0.999994	0.074101	0.999959
Alg13	-0.274649	0.529295	-0.183012	0.532448	-0.393148	0.138033	-0.188306	0.587406	-0.373865	0.0634237	-0.0722674	0.875064	-0.3016	0.381886	-0.220329	0.804257	-0.22107	0.444364	-0.626857	0.0128631	0.0696244	0.941521	-0.040089	0.988302	0.18244	0.999983	-0.146742	0.999778	0.206962	0.636341	0.0623072	0.999992	-0.0709076	0.999994	0.155302	0.999959
Alg2	-0.269629	0.342798	-0.229268	0.22415	-0.359613	0.0672122	-0.180564	0.452888	-0.615176	1.04284e-05	-0.149094	0.534098	-0.0930248	0.773564	-0.131632	0.876852	-0.0191224	0.936615	-0.186824	0.324188	-0.00581831	0.992802	0.0407951	0.965815	-0.00894082	0.999983	-0.0644382	0.999778	0.0635951	0.894521	-0.0955034	0.999992	0.0100878	0.999994	0.0662885	0.999959
Alg3	0.461254	0.363291	0.282868	0.443844	0.392003	0.295299	0.314405	0.460853	0.557393	0.0328122	0.174283	0.710207	0.369251	0.377495	0.0637408	0.989467	-0.575917	0.0671733	-0.317501	0.330431	-0.0497254	0.982426	-0.256754	0.696262	-0.178221	0.999983	-0.0386044	0.999778	0.552398	0.159644	0.0552758	0.999992	-0.247075	0.999994	0.0881435	0.999959
Alg5	0.134778	0.8499	-0.156305	0.63991	-0.274668	0.375493	-0.0552273	0.934907	-0.122886	0.640974	0.145697	0.695656	-0.440479	0.131595	-0.178717	0.884927	-0.500266	0.0415117	-0.0865999	0.786266	0.0925716	0.916336	0.16331	0.790722	0.0547912	0.999983	0.0457123	0.999778	-0.396886	0.246368	-0.0245858	0.999992	-0.00909	0.999994	0.133231	0.999959
Alg6	-0.324911	0.638491	0.201297	0.658518	-0.230258	0.635506	-0.513658	0.189459	-0.584378	0.0398189	-0.408614	0.337511	-0.395516	0.404004	-0.259951	0.867932	0.243109	0.55083	0.577289	0.100069	0.201957	0.82317	-0.27633	0.705802	0.295889	0.999983	-0.237128	0.999778	-0.0915916	0.934956	0.100983	0.999992	-0.143339	0.999994	-0.271526	0.999959
Alg8	0.0332458	0.971741	0.106143	0.703728	-0.138848	0.635069	0.064583	0.886648	-0.136937	0.482709	-0.222468	0.386839	-0.113467	0.772397	-0.181088	0.813864	-0.409415	0.0527454	-0.0260112	0.923591	0.162373	0.721609	-0.416071	0.0953488	0.0809975	0.999983	-0.00953909	0.999778	0.133324	0.769978	0.171331	0.999992	-0.145329	0.999994	0.184126	0.999959
Alg9	0.140636	0.761993	-0.0232528	0.941065	-0.569919	0.00354718	-0.242273	0.308091	-0.120547	0.527972	-0.083098	0.791491	-0.188393	0.509411	-0.169471	0.812097	-0.163414	0.465919	-0.302554	0.120341	-0.109477	0.831906	-0.0544464	0.948367	0.0526159	0.999983	0.0724877	0.999778	-0.135602	0.691596	-0.0816999	0.999992	-0.00344486	0.999994	0.100621	0.999959
Alk	0.437353	0.874531	2.42481	0.0033947	-0.580904	0.709632	-0.410192	0.835324	2.27165	0.000547803	1.91225	0.355166	-1.82002	0.407422	-0.895822	0.888773	3.66282	0.0383824	2.26734	0.257722	-0.618479	0.823981	1.18245	0.53686	0.0685682	0.999983	0.257182	0.999778	0.168419	0.788078	-0.244867	0.999992	0.470693	0.999994	-0.0924214	0.999959
Alkal1	3.24211	NA	1.67023	NA	2.09884	NA	-3.44115	NA	2.79505	NA	0.296487	NA	-0.00839069	NA	-0.710623	NA	0.45803	NA	0.397696	NA	-0.102792	NA	0.908412	NA	-0.024606	NA	1.27688	0.999778	-0.902848	NA	-1.00986	0.999992	-0.17434	NA	-0.289995	0.999959
Alkal2	1.82031	NA	0.252856	0.938053	-0.933323	NA	-0.234593	0.970534	-1.04135	0.619842	-0.522268	NA	-0.00839079	NA	1.21296	0.975382	-1.43747	NA	-0.564095	NA	-0.102793	NA	-1.87511	NA	0.464509	0.999983	-1.81689	0.999778	0.994992	0.740927	0.970099	0.999992	0.382921	0.999994	-1.21684	0.999959
Alkbh1	-0.358754	0.538893	0.471801	0.131362	0.245797	0.573209	-0.0340804	0.988992	-0.210382	0.491559	-0.110676	0.841589	0.0195409	0.999876	0.142113	0.971228	0.336077	0.337191	0.082206	0.855774	0.0672213	0.963463	-0.0372516	0.996107	0.293585	0.999983	0.0555247	0.999778	0.0349134	0.996583	0.169584	0.999992	0.00793955	0.999994	0.294282	0.999959
Alkbh2	0.0504271	0.971741	-0.069414	0.908917	0.119774	0.849134	0.063821	0.957585	0.489536	0.0966094	0.402783	0.38587	-0.256889	0.672595	0.0133528	0.989799	-0.165701	0.734984	0.0227207	0.96334	0.0751319	0.965602	0.239796	0.809054	-0.0529653	0.999983	0.0363391	0.999778	-0.241215	0.705686	0.144049	0.999992	0.0616981	0.999994	0.0339207	0.999959
Alkbh3	0.111878	0.948738	0.133189	0.830503	0.0206348	0.976506	-0.0531229	0.973031	0.572874	0.0766638	0.232904	0.674011	-0.152863	0.83416	0.563664	0.460261	-0.675249	0.0685553	-0.524305	0.153831	-0.1576	0.897148	-0.888388	0.029641	0.067029	0.999983	-0.419446	0.999778	0.0918206	0.943597	-0.130727	0.999992	0.0948532	0.999994	-0.0802551	0.999959
Alkbh4	0.103088	0.927884	-0.106004	0.824717	-0.376319	0.290621	-0.0483817	0.962837	0.0849169	0.81067	0.392202	0.298213	-0.140323	0.82023	-0.0404983	0.989467	-0.197649	0.623713	-0.0935282	0.83222	-0.172245	0.84222	0.0549377	0.983292	-0.164448	0.999983	0.0012475	0.999778	-0.986284	0.00647912	0.0548841	0.999992	-0.013588	0.999994	0.0554332	0.999959
Alkbh5	-0.185011	0.530377	-0.141408	0.450096	-0.0763368	0.763803	0.0251536	0.963883	-0.193293	0.167862	-0.143415	0.491832	0.0264451	0.958151	0.00653359	0.989787	0.0710895	0.732499	-0.0701743	0.722778	-0.1598	0.600027	-0.116018	0.748521	-0.0836153	0.999983	0.0802496	0.999778	-0.168275	0.499247	-0.122262	0.999992	-0.0118247	0.999994	0.0702515	0.999959
Alkbh6	-0.0225851	0.983476	-0.0592468	0.928798	0.662693	0.125631	0.0950796	0.924076	0.34984	0.318481	0.410458	0.410909	-0.486726	0.340363	-0.0623579	0.989467	-0.243428	0.604682	-0.231625	0.610273	-0.109674	0.940444	0.312229	0.702108	-0.1472	0.999983	0.0204543	0.999778	-0.0131365	0.996583	0.0506308	0.999992	0.0453537	0.999994	-0.0707733	0.999959
Alkbh7	0.141646	0.95613	-0.547059	0.323625	0.130513	0.891036	0.141756	0.903196	0.307498	0.535495	0.638145	0.320043	-0.266555	0.754111	0.599147	0.617349	-0.318657	0.590868	-0.65674	0.18053	-0.215058	0.892159	-0.0172184	0.996107	-0.215953	0.999983	0.371325	0.999778	-1.16355	0.0429413	-0.278442	0.999992	-0.174747	0.999994	-0.32702	0.999959
Alkbh8	-0.442391	0.466229	-0.159881	0.753209	-0.0974092	0.882483	-0.19846	0.740332	-0.701005	0.0143438	-0.267121	0.572809	-0.123163	0.874356	-0.021765	0.989467	0.73115	0.0486825	0.198932	0.670011	0.022211	0.992151	-0.278801	0.727111	0.139706	0.999983	-0.173263	0.999778	0.294199	0.606818	0.0137478	0.999992	0.0514696	0.999994	0.0510407	0.999959
Allc	-0.356626	NA	-0.563968	NA	-0.246079	NA	-1.854	NA	0.309307	NA	-0.422816	NA	-0.00839018	NA	0.251146	NA	-0.503724	NA	-0.564054	NA	-0.102786	NA	-0.0533684	NA	0.937121	NA	3.2783	0.999778	3.74167	NA	-1.07736	0.999992	1.24819	NA	-0.289977	0.999959
Alms1	-0.326462	0.750504	0.0267724	0.969489	0.386425	0.494115	0.162694	0.857427	-0.20419	0.655419	-0.360478	0.527869	0.550911	0.359951	-0.0146169	0.990582	1.30879	0.00159895	1.48425	0.00053819	0.0746398	0.978769	0.070653	0.98667	0.148109	0.999983	0.0300625	0.999778	0.137529	0.905682	-0.0470565	0.999992	0.0155045	0.999994	0.0879244	0.999959
Alox12b	0.691333	NA	-1.13749	NA	0.715698	NA	2.22732	NA	0.961349	NA	2.97268	NA	-1.75667	NA	-1.24031	NA	1.85689	NA	1.18237	NA	-2.8652	NA	-0.0533722	NA	1.29981	0.999983	1.85688	0.999778	-1.04028	NA	-0.265472	0.999992	-0.257435	NA	1.05402	0.999959
Alox15b	1.55971	NA	0.534451	0.873805	-0.246097	NA	-2.00104	0.607504	1.97107	0.254156	-0.422846	NA	-0.826246	NA	0.913209	0.986119	2.32799	NA	2.85412	NA	-0.102793	NA	1.69026	NA	0.0489081	0.999983	0.354145	0.999778	1.78451	0.378615	-0.0919148	0.999992	-0.201297	0.999994	1.14137	0.999959
Alox5	0.290493	0.864344	0.159048	0.882877	0.589775	0.419446	0.478188	0.570911	-0.384751	0.503346	0.884073	0.228178	-0.369725	0.722067	-1.03415	0.335653	0.969849	0.109908	0.0726591	0.923288	0.0729147	0.992151	1.05729	0.156288	-0.473481	0.999983	0.0595923	0.999778	0.627716	0.656947	-0.734752	0.999992	0.46725	0.999994	-0.173645	0.999959
Aloxe3	-1.34464	0.765293	0.439468	0.786605	1.1663	0.560924	-2.81765	0.209792	0.0826546	0.945724	-0.141253	0.935675	-0.00839079	0.999876	1.72749	0.843195	-1.46556	0.613503	1.26381	0.624489	1.75335	0.724979	1.51596	0.655195	-0.0180747	0.999983	0.37657	0.999778	0.126429	0.924423	-0.0429457	0.999992	0.285416	0.999994	-0.532418	0.999959
Alpi	-0.356651	0.973001	-0.564008	0.917925	-0.246097	0.965856	-0.127338	0.99019	0.309329	0.941983	-0.422846	0.937624	0.605794	0.882216	1.10945	0.9479	-2.88383	0.159915	-0.593404	0.822074	-0.119096	0.992151	-1.1087	0.851175	-1.9773	0.999983	-0.164044	0.999778	-0.902798	0.920905	0.913718	0.999992	-2.45645	0.999994	0.671797	0.999959
Alpk1	0.0518415	0.976281	0.444439	0.533222	0.0846055	0.954137	0.192162	0.880017	0.120726	0.87598	-0.567542	0.444048	0.234471	0.861823	-0.22363	0.989467	0.841915	0.205089	0.746738	0.312928	0.0684646	0.992151	-0.174642	0.948367	0.255399	0.999983	0.193715	0.999778	0.404594	0.749571	0.486065	0.999992	0.552173	0.999994	0.743993	0.999959
Alpk2	0.809386	0.231861	-0.0567715	0.940791	0.281451	0.706916	0.446606	0.488022	-0.543154	0.192179	-0.00858581	0.99046	-0.333995	0.799929	-0.351189	0.9244	1.12787	0.0926546	1.45644	0.0500199	-1.26352	0.0678243	0.12524	0.97315	0.296646	0.999983	-0.535461	0.999778	0.0150342	0.996583	0.0109831	0.999992	0.651034	0.999994	0.081259	0.999959
Alpk3	-0.133477	0.971201	-0.79728	0.216729	0.216379	0.842932	0.378507	0.711893	-0.590899	0.297754	-0.169057	0.892988	-0.853703	0.647472	1.78627	0.304329	0.212964	0.88244	0.514236	0.683399	-1.38638	0.259054	-0.279205	0.946307	-0.534825	0.999983	0.0217679	0.999778	-1.73015	0.0106196	0.211806	0.999992	-0.490459	0.999994	-0.147755	0.999959
Alpl	0.139086	0.941263	0.3597	0.503715	0.876416	0.0698168	0.721856	0.150851	0.208861	0.65694	0.206752	0.766767	-1.49056	0.224129	0.731984	0.805001	1.43177	0.122708	1.74226	0.298635	-1.42475	0.24427	0.541909	0.766063	-0.274371	0.999983	0.231997	0.999778	0.599243	0.366694	0.134054	0.999992	0.522086	0.999994	-0.0673494	0.999959
Als2	-0.0275418	0.982495	-0.412804	0.449211	0.0225225	0.977951	0.138738	0.893714	-0.636564	0.112679	-0.288141	0.666099	0.502219	0.403049	-0.0593233	0.989467	-0.651042	0.162362	-0.0974631	0.864092	-0.105778	0.957355	-1.14747	0.0179025	-0.164224	0.999983	0.0747881	0.999778	-0.421562	0.576659	-0.0590316	0.999992	-0.228893	0.999994	-0.212525	0.999959
Als2cl	0.615942	0.316107	0.212443	0.696573	0.288109	0.600831	0.807477	0.0490222	0.657697	0.0469801	0.0696641	0.930745	1.22641	0.00154418	0.416693	0.711936	-0.72301	0.0653337	1.24217	0.000547436	1.07078	0.00988584	0.360471	0.628002	0.118508	0.999983	0.20537	0.999778	-0.452061	0.450557	0.059448	0.999992	-0.244611	0.999994	-0.0863044	0.999959
Alx1	0.743049	0.871528	-0.72732	0.747801	0.513267	NA	1.28015	0.568761	-0.370255	0.852103	-0.389427	0.90672	-0.00839079	NA	0.251164	0.989467	-0.50376	NA	-0.564095	NA	-0.102793	NA	-0.0533722	NA	-1.14444	0.999983	-1.09126	0.999778	1.54923	0.591045	-1.69929	0.999992	3.82509	0.999994	-0.0735285	0.999959
Alx3	1.34223	NA	1.91842	0.534724	0.715698	NA	-1.70114	0.685661	2.54192	0.173048	0.538948	NA	-0.00839079	NA	0.251164	0.989467	-0.50376	NA	-0.564095	NA	-1.06459	NA	-0.0533722	NA	0.158782	0.999983	-0.00837657	0.999778	0.142962	0.996583	1.1105	0.999992	-1.01678	0.999994	-0.635613	0.999959
Alx4	1.07844	0.733902	-0.670149	0.629231	-1.51568	0.314498	-1.55445	0.445518	1.3299	0.214812	0.0418018	0.985463	1.31232	0.636787	0.721303	0.848777	0.0541256	0.965953	-0.802657	NA	-0.154732	0.974908	-1.25812	0.362125	0.176903	0.999983	-0.61958	0.999778	-0.507296	0.657238	0.879371	0.999992	-0.663705	0.999994	0.154247	0.999959
Alyref	0.320248	0.616124	0.356766	0.309031	-0.112626	0.840638	-0.0629837	0.945548	0.638892	0.0152759	0.456679	0.256172	-0.141632	0.81018	0.0887421	0.989467	-0.0487215	0.904188	-0.0685569	0.8621	0.238652	0.735032	0.0274104	0.996107	-0.0644196	0.999983	0.0767037	0.999778	0.0959383	0.915044	-0.0343326	0.999992	0.104904	0.999994	0.117196	0.999959
Amacr	0.0167631	0.987215	-0.372974	0.391735	-0.530577	0.225249	-0.244168	0.691046	-0.204323	0.602494	0.083614	0.922421	-0.193505	0.761569	-0.00256308	0.998433	-0.479647	0.209407	-0.72484	0.0361491	-0.440407	0.489398	-0.590737	0.22146	-0.0628328	0.999983	-0.000156549	0.99996	-0.0901854	0.943194	0.00154584	0.999992	-0.10284	0.999994	-0.0722153	0.999959
Ambn	-0.356626	NA	-0.563968	NA	-0.246079	NA	-0.127328	NA	0.309307	NA	-0.422816	NA	-3.76311	NA	-0.71058	NA	-0.503724	NA	-0.564054	NA	-0.102786	NA	-0.0533684	NA	-0.98633	NA	-0.164027	0.999778	0.059008	NA	-0.0480727	0.999992	-0.174324	NA	-0.289977	0.999959
Ambra1	0.188383	0.603473	0.166689	0.433434	0.351965	0.0861342	0.472835	0.00781234	0.173284	0.298424	-0.247468	0.283922	0.592174	0.00164945	-0.0034839	0.995054	-0.111925	0.628912	0.43332	0.0168864	0.218401	0.493124	0.0521099	0.949201	0.0223943	0.999983	0.0880583	0.999778	-0.0352849	0.962315	0.00558394	0.999992	0.0517866	0.999994	-0.0749823	0.999959
Amd1	-0.48176	0.297999	0.293146	0.396826	-0.322386	0.394222	-0.0401746	0.976271	0.236073	0.411543	-0.509047	0.185839	-0.015513	0.999876	-0.380326	0.584243	0.387464	0.216253	0.155722	0.657304	0.0123575	0.992151	0.240883	0.702235	-0.0596695	0.999983	-0.0287031	0.999778	-0.0116991	0.996583	0.0425222	0.999992	-0.034935	0.999994	-0.0328587	0.999959
Amdhd1	-0.185184	0.962391	-1.15306	0.0981877	-1.21816	0.123922	-0.724151	0.449786	-2.3863	3.65247e-05	-2.09803	0.00448811	2.22996	0.402089	0.418243	0.983588	1.5712	0.326752	3.31052	0.074204	0.136156	0.989936	0.299469	0.947613	0.0400961	0.999983	0.031258	0.999778	-0.222026	0.910329	-0.0797121	0.999992	-0.141321	0.999994	0.435121	0.999959
Amdhd2	0.272042	0.774701	0.314186	0.497828	0.572597	0.188256	0.293135	0.610486	0.422684	0.215434	0.533526	0.270847	-0.140823	0.861823	0.192885	0.965739	0.211454	0.677962	-0.293758	0.521945	-0.0222189	0.992151	-0.27982	0.774231	0.0230041	0.999983	0.168679	0.999778	-0.178566	0.850397	0.121612	0.999992	0.132175	0.999994	0.481464	0.999959
Amelx	-0.356626	NA	-0.563968	NA	-0.246079	NA	-0.127328	NA	0.309307	NA	-0.422816	NA	-0.00839018	NA	0.251146	NA	-0.503724	NA	-0.564054	NA	-0.102786	NA	-0.0533684	NA	-0.0246045	NA	-0.164027	0.999778	0.0587664	NA	-0.0480727	0.999992	1.24834	NA	0.671749	0.999959
Amer1	-0.459486	0.530799	-0.544741	0.180275	0.222991	0.714801	0.231929	0.732892	-0.699	0.0356739	-0.383985	0.452097	0.181547	0.83115	-0.0861722	0.989467	0.720274	0.0880869	1.128	0.00517519	0.311159	0.73013	0.272301	0.788029	0.114112	0.999983	-0.0470211	0.999778	-0.0801235	0.959018	-0.0405679	0.999992	-0.126363	0.999994	-0.270734	0.999959
Amer2	-0.66264	0.746379	-1.33438	0.145944	2.05758	0.186183	1.59367	0.201073	-4.31573	0.0014142	1.20603	0.389665	1.61884	0.249257	-0.748005	0.853008	0.250812	0.861504	-0.0909799	0.947686	-0.18725	0.966337	1.02243	0.54201	0.0554862	0.999983	-0.060272	0.999778	0.179682	0.943883	-0.0320079	0.999992	-0.106081	0.999994	0.0390998	0.999959
Amer3	-0.356651	0.971741	-0.564008	0.90176	-0.246097	0.960682	-0.127338	0.99019	0.309329	0.93298	-0.422847	0.930745	-0.998345	0.741459	-0.148201	0.989467	-0.493153	0.874466	0.173425	0.924649	-0.104463	0.992151	-0.487395	0.938669	-0.0229497	0.999983	0.0682728	0.999778	-0.343716	0.103534	-0.0731565	0.999992	0.208759	0.999994	0.0950222	0.999959
Amfr	-0.128658	0.703216	-0.3906	0.00318213	-0.190088	0.291443	0.105212	0.65657	-0.449139	0.000175482	-0.0163863	0.947831	-0.0261085	0.953942	-0.0887393	0.933946	-0.136505	0.423226	-0.0662812	0.719843	-0.0332292	0.961985	0.0467898	0.939752	0.00602047	0.999983	-0.12865	0.999778	-0.386691	0.0153033	0.0369852	0.999992	-0.00623167	0.999994	-0.0286459	0.999959
Amh	-0.90918	NA	-0.0885631	0.97424	1.43051	NA	2.22582	NA	0.433511	0.819782	4.50744	NA	-0.00839079	NA	2.17681	0.746519	-0.542467	NA	-1.1069	NA	-1.53181	NA	-0.51688	NA	-0.198926	0.999983	0.224867	0.999778	-0.279675	NA	3.82933	0.999992	-1.56268	NA	-0.530835	0.999959
Amhr2	0.22547	0.971741	-0.532614	0.763792	1.02688	0.604657	0.675369	0.766268	0.543338	0.662844	0.921122	0.610158	-0.941856	0.556493	-2.15149	0.241285	-0.834458	0.545148	-0.386655	NA	-1.51344	0.344949	-2.48606	0.0610994	0.26524	0.999983	-1.26143	0.999778	-0.441431	0.892823	-0.417861	0.999992	1.09456	0.999994	0.773457	0.999959
Amigo1	-0.372002	0.548018	-0.259678	0.515057	-0.303116	0.499648	0.105362	0.88602	-0.645286	0.0173938	-1.02042	0.00210379	0.388244	0.55806	0.012101	0.992099	0.593909	0.179162	1.34529	0.00199567	-0.500955	0.438869	-0.0232178	0.996107	0.0554468	0.999983	0.0113353	0.999778	-0.0724211	0.944704	-0.0197733	0.999992	0.162647	0.999994	0.00369667	0.999959
Amigo2	-0.383474	0.538371	-0.837563	0.00483207	-0.377704	0.36338	-0.303545	0.515455	-1.21556	3.59249e-06	-0.5019	0.237851	-0.409924	0.557706	0.271628	0.90968	0.484138	0.333583	0.747544	0.172567	-0.687031	0.243129	-0.0352088	0.996107	0.000260481	0.999983	0.40276	0.999778	0.110269	0.905729	0.399171	0.999992	-0.170089	0.999994	0.152658	0.999959
Amigo3	0.267411	0.808014	0.598098	0.157733	0.924031	0.0509304	0.277052	0.694519	0.749579	0.0297184	0.665148	0.225631	-0.0160375	0.999876	-0.442006	0.689689	-0.312239	0.506895	0.728981	0.0708309	-0.295099	0.753236	0.60103	0.29163	-0.0828922	0.999983	0.116717	0.999778	0.343891	0.664356	0.161272	0.999992	0.196594	0.999994	0.627669	0.999959
Ammecr1	-0.208921	0.854067	0.284344	0.573919	-0.0730815	0.935115	-0.0926533	0.928827	-0.407409	0.258483	-0.274234	0.625729	-0.300268	0.613353	-0.268249	0.893108	0.195356	0.689742	0.193918	0.681025	0.518256	0.402313	0.0760985	0.975567	0.526903	0.999983	-0.0393733	0.999778	0.422974	0.531706	0.00242657	0.999992	0.257346	0.999994	0.439779	0.999959
Ammecr1l	-0.140304	0.770263	-0.181674	0.427842	-0.0314708	0.946175	0.0859213	0.827772	-0.391487	0.0157605	-0.174256	0.49877	0.209973	0.464502	-0.0617638	0.989467	-0.0309967	0.908449	0.426641	0.0324836	-0.0179287	0.992151	-0.00420587	0.996107	0.00268088	0.999983	-0.00443675	0.999778	0.0538214	0.929664	0.0862359	0.999992	-0.0972691	0.999994	-0.0527677	0.999959
Amn	-0.356651	0.971741	1.89032	0.50899	-0.246097	0.960682	-0.127338	0.99019	3.25314	0.075333	0.454484	0.930745	-0.0141808	0.999876	-1.15559	0.689566	0.348164	0.811422	-0.72	0.538734	-0.581694	0.84337	0.573826	0.855683	0.991947	0.999983	-0.154458	0.999778	-0.903041	0.896287	0.924173	0.999992	-3.09307	0.999994	-2.13976	0.999959
Amn1	0.0916261	0.946419	0.148188	0.740679	-0.658952	0.0473916	-0.426358	0.244035	-0.187432	0.541081	-0.0275939	0.956451	-0.496156	0.222447	0.000276111	0.999609	-0.103494	0.824722	-0.717872	0.0217072	0.068344	0.963017	0.43914	0.362292	-0.0762997	0.999983	0.0979752	0.999778	-0.270798	0.589398	0.063161	0.999992	-0.258338	0.999994	-0.159537	0.999959
Amot	-0.789095	0.356673	-1.23841	0.00956802	-0.398041	0.592219	-0.93224	0.114731	-1.23198	0.00471235	-0.90313	0.181775	-0.198293	0.845986	-0.128575	0.989467	0.361689	0.56641	0.932822	0.0794522	0.469354	0.675177	-0.507126	0.602444	0.0863759	0.999983	-0.194817	0.999778	0.357525	0.713885	0.108624	0.999992	-0.0403802	0.999994	0.0452522	0.999959
Amotl1	-0.424788	0.503453	-0.909671	0.00298545	-0.067914	0.927889	0.162925	0.814179	-0.360988	0.25665	-0.459546	0.294889	0.109062	0.886706	0.364216	0.73606	0.89775	0.00911616	0.789893	0.0258671	-0.624714	0.182788	-0.312249	0.667206	0.0251203	0.999983	0.110029	0.999778	0.250698	0.693684	0.02697	0.999992	0.296514	0.999994	0.0738038	0.999959
Amotl2	0.158702	0.803501	-0.431772	0.0681339	0.130456	0.731941	0.226416	0.506324	-0.390077	0.0616326	-0.199242	0.545368	0.764951	0.00575812	0.147559	0.938284	0.284658	0.320997	0.254477	0.395564	-0.269886	0.573151	-0.130373	0.878332	0.203111	0.999983	0.101371	0.999778	-0.00720133	0.996583	0.234081	0.999992	0.181848	0.999994	0.181685	0.999959
Ampd1	1.72645	NA	-0.563987	NA	-1.20785	NA	-1.08909	NA	0.309317	NA	-2.31336	NA	-0.00839047	NA	0.251154	NA	-0.503741	NA	-0.564073	NA	-0.102789	NA	-0.0533702	NA	0.489335	NA	2.86904	0.999778	-6.6343	NA	1.52842	0.999992	-2.64222	NA	-0.504633	0.999959
Ampd2	0.0981083	0.968737	0.121442	0.879636	0.481158	0.369362	0.124449	0.899955	0.322604	0.441929	0.0995225	0.920083	0.235446	0.749082	-0.440606	0.733905	-0.0774644	0.890861	-0.025727	0.960978	-0.290654	0.778145	-0.214177	0.876302	-0.0955331	0.999983	0.0734859	0.999778	-0.283862	0.72961	0.156565	0.999992	-0.235111	0.999994	0.00338896	0.999959
Ampd3	-0.197978	0.859308	0.0651805	0.922568	0.0265992	0.970524	0.402325	0.428924	-0.61921	0.0554293	-0.287268	0.591616	-0.384316	0.585317	0.221277	0.962066	0.950705	0.0605025	0.101611	0.859775	-0.819426	0.126215	0.407678	0.634275	0.0194609	0.999983	-0.020623	0.999778	-0.0474534	0.989187	0.0623628	0.999992	0.273414	0.999994	0.295311	0.999959
Amph	-0.129371	0.863827	-0.60401	0.00934601	-0.128355	0.754736	-0.120781	0.81315	-0.86863	1.81815e-05	-0.580871	0.0644616	1.05357	0.249257	0.182223	0.989234	0.0273033	0.971932	1.97333	0.0250749	-1.1858	0.0184398	0.114587	0.969347	-0.00555217	0.999983	0.00698382	0.999778	-0.0874423	0.897201	-0.0498573	0.999992	0.205472	0.999994	0.102388	0.999959
Amt	0.11846	0.849673	-0.493896	0.0139316	-0.230366	0.404121	-0.411563	0.0861487	-0.434325	0.0178788	0.235132	0.408546	0.115935	0.76177	0.146293	0.90132	0.00294145	0.99259	-0.0325196	0.906356	0.053562	0.952264	-0.388177	0.15213	-0.094004	0.999983	-0.0519942	0.999778	-0.129978	0.764631	-0.0378083	0.999992	-0.13932	0.999994	0.0605248	0.999959
Amtn	0.300283	0.877878	-0.572158	0.455192	-0.518015	0.556674	-1.11875	0.120384	-1.061	0.0544114	-0.664058	0.422354	-0.00839079	0.999876	0.251164	0.989467	-0.50376	0.882221	-0.564095	0.855818	-0.102793	0.992151	-0.0533722	0.996107	-0.0246063	0.999983	-0.164044	0.999778	0.0586488	0.996583	-0.0480762	0.999992	-0.174343	0.999994	-0.289998	0.999959
Amz1	0.29765	0.781992	0.896455	0.0156136	-0.484492	0.344238	-0.0902161	0.938315	1.03508	0.00131673	0.855126	0.143855	-0.68361	0.263158	-0.694502	0.460987	-0.378087	0.512972	-0.250753	0.681719	0.157007	0.922162	0.453205	0.615188	-0.0414269	0.999983	0.0478986	0.999778	-0.241143	0.725575	0.122623	0.999992	0.166945	0.999994	0.0463207	0.999959
Amz2	0.0952445	0.877303	-0.294019	0.158887	-0.614263	0.0030804	-0.451947	0.0303934	-0.32559	0.0599094	-0.085007	0.804353	-0.248912	0.363357	0.0547263	0.989467	-0.256576	0.244322	-0.73117	0.000109493	-0.324423	0.257659	-0.0388818	0.979132	-0.0790995	0.999983	0.0158921	0.999778	0.00752479	0.996583	-0.0395458	0.999992	-0.0230634	0.999994	-0.0488675	0.999959
Anapc1	-0.218247	0.665631	0.0263598	0.945876	0.00990724	0.980369	0.032406	0.97486	-0.205197	0.360978	-0.474496	0.113965	0.288522	0.354907	-0.0706731	0.989467	0.339449	0.166233	0.606952	0.00644903	0.146873	0.809091	-0.132825	0.848233	0.117777	0.999983	0.00117071	0.999778	0.111219	0.84096	-0.0896805	0.999992	0.0450484	0.999994	-0.0634887	0.999959
Anapc10	-0.564789	0.209707	0.0639901	0.905896	-0.0651189	0.922456	-0.0566895	0.953738	-0.212919	0.485294	-0.459926	0.246571	-0.359681	0.418511	-0.0622954	0.989467	0.227435	0.570728	-0.256926	0.508878	0.336089	0.581392	-0.0678788	0.97315	0.0829206	0.999983	-0.192017	0.999778	0.164953	0.816952	-0.246007	0.999992	-0.163999	0.999994	0.166243	0.999959
Anapc11	0.389643	0.650019	-0.137541	0.838528	0.160842	0.815632	0.228118	0.752451	0.515735	0.14642	0.577758	0.263636	-0.231015	0.733541	0.350642	0.817333	-0.661061	0.10192	-0.750844	0.0484484	-0.283724	0.763945	-0.157652	0.918283	-0.119817	0.999983	0.19117	0.999778	-0.84134	0.0774941	-0.102326	0.999992	-0.209013	0.999994	-0.313326	0.999959
Anapc13	-0.041907	0.976713	-0.218515	0.752805	0.295069	0.671764	-0.323512	0.665417	0.555851	0.184514	0.555143	0.352962	-0.778187	0.159934	0.498927	0.708701	-0.434822	0.396343	-0.70933	0.117015	-0.225029	0.875433	0.0571211	0.996107	-0.0940688	0.999983	0.157599	0.999778	-0.121803	0.935764	0.028379	0.999992	0.0139078	0.999994	-0.0694305	0.999959
Anapc15	0.472787	0.464736	0.577803	0.109314	-0.0477436	0.960682	-0.299356	0.573791	1.25554	8.07413e-06	0.374722	0.426494	-0.444993	0.341011	0.114007	0.989467	-0.359661	0.361081	-0.315776	0.410881	-0.0558163	0.983495	0.0270362	0.996107	-0.176343	0.999983	-0.0851812	0.999778	0.023589	0.996583	0.0226084	0.999992	0.0483063	0.999994	-0.0970558	0.999959
Anapc16	-0.218005	0.654096	-0.322036	0.178101	-0.2091	0.49284	-0.146551	0.70141	-0.0686152	0.808571	0.422424	0.1572	-0.416065	0.136897	-0.0453289	0.989467	0.192097	0.483813	-0.411929	0.0764248	-0.269028	0.527176	0.29189	0.438773	-0.0667789	0.999983	0.0741285	0.999778	-0.477063	0.106466	0.0523098	0.999992	0.0956136	0.999994	-0.0472962	0.999959
Anapc2	0.0351103	0.971741	-0.410975	0.036216	0.272404	0.271327	0.0846277	0.845248	-0.26682	0.145704	0.208872	0.440023	0.263608	0.370498	-0.073194	0.989467	0.0410548	0.88922	-0.0556062	0.854875	-0.234269	0.554067	-0.050839	0.961599	-0.0675098	0.999983	0.108655	0.999778	-0.223274	0.487976	-0.0662517	0.999992	0.124901	0.999994	0.155803	0.999959
Anapc4	-0.0949235	0.857123	0.100696	0.69446	-0.348704	0.0866686	-0.136775	0.625377	-0.225722	0.165659	-0.101333	0.71421	-0.13207	0.67397	-0.243289	0.582548	0.332839	0.0860575	-0.0844222	0.726425	-0.0161566	0.992151	-0.0766972	0.91532	-0.0165366	0.999983	-0.0814799	0.999778	0.020331	0.996583	0.0304806	0.999992	-0.0515069	0.999994	0.0908016	0.999959
Anapc5	0.0120713	0.977874	-0.366558	0.00633661	-0.129729	0.517036	-0.183862	0.331291	-0.215307	0.0979255	-0.0161007	0.94891	-0.348721	0.0352114	-0.0512369	0.989467	-0.0891793	0.626297	-0.0785308	0.657688	-0.153657	0.59575	-0.0761465	0.875289	-0.0968126	0.999983	0.0055761	0.999778	-0.247042	0.191593	-0.0588761	0.999992	-0.0436616	0.999994	0.0550345	0.999959
Anapc7	0.151772	0.746734	-0.0415111	0.903479	-0.0836755	0.796175	-0.0610434	0.890564	0.213263	0.221986	0.205499	0.414153	-0.162863	0.587895	0.0286813	0.989467	-0.171539	0.443849	-0.139829	0.531191	0.133317	0.776787	-0.146351	0.740945	0.0409374	0.999983	0.0796839	0.999778	-0.0697966	0.894521	-0.0234499	0.999992	0.102578	0.999994	-0.00629955	0.999959
Ang	0.483083	0.709041	-0.163492	0.877193	-0.035294	0.972784	-0.164096	0.901418	-0.27759	0.647661	0.60134	0.414147	-0.720494	0.30555	-0.0999993	0.989467	0.932743	0.0937204	0.033485	0.96051	-0.0110936	0.994821	0.0760696	0.994136	-0.591285	0.999983	0.941468	0.999778	0.999417	0.396685	-0.213284	0.999992	-0.953003	0.999994	0.492378	0.999959
Angel1	-0.0449439	0.971741	-0.650296	0.0182178	0.153485	0.748682	0.217065	0.642508	-0.704609	0.00409863	-0.0833878	0.892029	-0.076139	0.939676	0.0449267	0.989467	0.617472	0.102745	0.738423	0.0489034	-0.392623	0.53291	0.312184	0.663996	-0.0718418	0.999983	0.187223	0.999778	-0.149843	0.830516	-0.0793021	0.999992	-0.13701	0.999994	-0.0732745	0.999959
Angel2	-0.248409	0.435785	-0.110779	0.657054	-0.112792	0.690476	0.0560621	0.893375	-0.444006	0.00302921	-0.133577	0.608919	-0.178203	0.556505	-0.0496241	0.989467	0.327847	0.116879	0.426117	0.036914	-0.111857	0.828729	0.131767	0.78965	-0.00644042	0.999983	0.0255713	0.999778	0.0537978	0.918772	0.072612	0.999992	-0.0525132	0.999994	0.00961994	0.999959
Angpt1	-0.849591	0.412368	-0.28411	0.751889	0.151648	0.898798	-0.186219	0.892426	-1.3141	0.00904203	-0.993773	0.19955	0.703726	0.599723	-1.40518	0.219687	0.943543	0.292922	0.360593	0.70953	-1.15652	0.257204	0.488263	0.809054	0.125333	0.999983	-0.0642942	0.999778	0.9126	0.277085	0.0901623	0.999992	-0.254594	0.999994	0.0657481	0.999959
Angpt2	-0.287599	0.719907	-1.00892	0.00078389	-0.345926	0.437745	-0.0906647	0.914436	-1.18297	1.66179e-05	-0.0656625	0.930745	0.335517	0.61451	0.604937	0.421516	0.408791	0.333557	-0.682477	0.0850488	-0.065787	0.97737	-0.842425	0.0628095	0.207184	0.999983	0.221108	0.999778	0.254056	0.720042	0.498153	0.999992	0.381807	0.999994	0.357349	0.999959
Angpt4	-0.584147	0.930443	0.917959	0.798557	0.700671	0.818542	2.35338	0.318513	-1.64396	0.293581	0.533862	0.903615	-0.111636	0.985086	0.0383781	0.989787	0.202338	0.884854	-0.816815	0.451164	-0.533629	0.85433	-1.5294	0.278484	0.371955	0.999983	3.28101	0.999778	0.943608	0.885444	0.913451	0.999992	-2.10751	0.999994	-0.699777	0.999959
Angptl1	0.37829	0.728961	-0.299427	0.632639	0.774274	0.141979	0.0349331	0.99019	-0.403005	0.362118	0.594751	0.318102	0.848471	0.132588	1.03215	0.131862	1.23655	0.00634333	0.892799	0.0517599	-0.747155	0.257512	-0.225569	0.893678	0.445989	0.999983	0.128795	0.999778	0.356225	0.683453	0.668824	0.999992	0.475261	0.999994	0.396342	0.999959
Angptl2	0.0679445	0.969506	-0.525766	0.0750283	0.367581	0.314192	0.0941592	0.890823	-0.465236	0.0736715	0.190326	0.665313	0.296174	0.518792	0.286374	0.792297	0.835019	0.00506726	0.386148	0.234131	-0.813816	0.0149495	0.0816692	0.95408	-0.1136	0.999983	-0.165866	0.999778	0.305719	0.563569	0.0143674	0.999992	0.00481736	0.999994	0.289799	0.999959
Angptl3	-0.356626	NA	-0.563968	NA	-0.246079	NA	-0.127328	NA	0.309307	NA	-0.422816	NA	-0.52921	NA	-0.267977	NA	-2.17418	NA	2.232	NA	-1.06451	NA	-0.324767	NA	-0.0246045	NA	-0.164027	0.999778	0.0602436	NA	-0.0480727	0.999992	-0.174324	NA	-0.289977	0.999959
Angptl4	0.238835	0.928739	1.1218	0.0990013	-0.65908	0.463714	-0.842261	0.330477	2.77483	1.46522e-07	0.0020327	0.998851	-0.463087	0.664909	0.378227	0.947703	-0.933752	0.192435	-0.716052	0.313888	-0.309857	0.888492	0.619074	0.642594	0.16733	0.999983	0.342607	0.999778	0.31447	0.854868	0.344887	0.999992	0.141773	0.999994	0.450809	0.999959
Angptl5	-0.0539341	0.97851	-1.28706	0.0731892	0.0673305	0.960682	-0.140064	0.946005	-1.49044	0.0148264	-0.303163	0.796789	0.544019	0.702722	1.29269	0.406328	1.1072	0.290574	0.0112918	0.991276	-0.607193	0.720882	-1.92955	0.125633	0.197527	0.999983	-0.273	0.999778	0.506434	0.706291	0.432622	0.999992	0.315589	0.999994	0.572737	0.999959
Angptl6	-1.12946	0.609637	-0.786315	0.471915	1.25844	0.231657	1.37242	0.308321	0.785495	0.28393	1.7957	0.198321	0.774232	0.687605	0.413799	0.97277	-0.28602	0.824846	-1.51138	0.144078	-0.299556	0.919613	0.519849	0.802584	-0.305627	0.999983	0.0455205	0.999778	-0.861354	0.315531	-0.0270387	0.999992	-0.156898	0.999994	0.331739	0.999959
Angptl7	-0.496098	0.82114	-0.875394	0.344769	0.669179	0.549754	-0.107849	0.977968	-1.4591	0.0355901	1.46429	0.16419	0.371839	0.822274	0.845168	0.753104	1.19687	0.226703	0.44798	0.685658	-0.529826	0.827915	-0.728044	0.74567	-0.151119	0.999983	0.194584	0.999778	0.185111	0.953287	0.800616	0.999992	-0.0231742	0.999994	0.786828	0.999959
Angptl8	0.816575	0.862613	-1.46961	0.425829	0.987367	NA	-1.1616	0.627761	-0.375853	0.85327	0.289838	0.930745	0.865171	NA	1.21296	0.977826	0.714393	NA	-2.35042	NA	-4.19545	NA	-1.01517	0.923131	-0.0246063	0.999983	-0.164044	0.999778	0.05866	0.996583	-0.0480761	0.999992	-0.174343	0.999994	-0.289998	0.999959
Ank1	0.39335	0.819676	-1.42003	0.0147612	0.678451	0.413385	0.375163	0.737511	-0.504106	0.410223	-0.800135	0.332767	1.2863	0.375043	0.015907	0.995091	1.00074	0.295055	0.478114	0.663009	-1.23909	0.319337	0.408622	0.890658	-0.300333	0.999983	0.149721	0.999778	-0.466889	0.669563	-0.110244	0.999992	-0.566764	0.999994	-0.189698	0.999959
Ank2	-0.563209	0.389072	-1.01207	0.00345869	-0.408362	0.41296	-0.433926	0.397838	-1.34224	1.47144e-05	-0.843965	0.0823841	0.374414	0.525215	-0.130327	0.989467	0.989113	0.00901436	0.561178	0.172714	-0.896922	0.0477681	-0.00266043	0.997949	0.179108	0.999983	-0.158253	0.999778	0.562088	0.281195	-0.0545244	0.999992	0.106479	0.999994	0.0508498	0.999959
Ank3	-0.315554	0.768721	-0.628319	0.159565	0.095502	0.914047	0.334212	0.611625	-1.03637	0.00367656	-0.981917	0.064688	0.130568	0.880847	-0.0688678	0.989467	-0.602634	0.171798	0.394542	0.382286	0.187244	0.892666	0.0658409	0.989571	0.197224	0.999983	-0.189296	0.999778	0.282697	0.733907	-0.117622	0.999992	-0.0170733	0.999994	-0.0717894	0.999959
Ankar	-0.356626	NA	-0.563968	NA	-1.19699	NA	0.834397	NA	0.309307	NA	0.53891	NA	-0.00839018	NA	2.20414	NA	-0.503724	NA	-0.564054	NA	3.16215	NA	-0.0533684	NA	-0.0246045	NA	-0.164027	0.999778	0.0594363	NA	-0.0480727	0.999992	1.3275	NA	-0.289977	0.999959
Ankdd1a	-0.269045	0.897158	0.847748	0.0737391	0.28654	0.834049	-0.269836	0.849305	0.805967	0.0341442	-1.21605	0.136085	-0.507958	0.665815	0.0771924	0.989467	-0.42125	0.565095	1.43565	0.219146	0.545416	0.606903	1.09738	0.136726	0.0272937	0.999983	0.129028	0.999778	-0.319951	0.355187	0.086277	0.999992	0.0180775	0.999994	-0.0289952	0.999959
Ankdd1b	-0.0689159	0.973426	-0.441741	0.628518	-0.586374	0.521995	-0.0486777	0.99019	-0.962387	0.109579	-0.653328	0.46554	-1.27309	0.116151	0.128584	0.989467	-0.993702	0.20103	-1.28281	0.0588203	0.217751	0.92998	-1.08364	0.32999	0.455451	0.999983	-1.49938	0.999778	-1.30378	0.317228	0.396105	0.999992	0.497544	0.999994	0.0270687	0.999959
Ankef1	-0.250966	0.932256	-1.46945	0.0357974	-0.626199	0.530126	0.0831293	0.987245	-2.63014	7.22577e-06	-0.783344	0.411952	2.45284	0.345525	0.251164	0.989467	1.5253	0.439329	-2.97495	0.165326	-4.28929	0.0474629	-0.0533722	0.996107	0.469046	0.999983	0.419542	0.999778	0.0732533	0.996583	0.258546	0.999992	1.10505	0.999994	1.79232	0.999959
Ankfn1	-0.238029	0.912199	-0.30749	0.72586	0.0673742	0.960682	-0.0765367	0.981062	-1.38797	0.00660535	-0.76557	0.319381	-0.00839079	0.999876	-0.710632	0.989467	-0.50376	0.882221	-0.564095	0.855774	-0.102793	0.992151	-0.0533722	0.996107	0.445163	0.999983	0.0785218	0.999778	0.790608	0.32915	0.294757	0.999992	0.135274	0.999994	0.300371	0.999959
Ankfy1	0.39454	0.215946	0.705644	0.000144448	0.1054	0.768279	0.769003	5.57276e-05	0.624788	0.000393338	-0.385034	0.173704	0.874183	9.76606e-06	-0.0318458	0.989467	-0.0991774	0.729714	0.531776	0.0104013	0.401482	0.158593	-0.0775484	0.925438	0.221327	0.999983	-0.10657	0.999778	0.108429	0.831818	0.0423331	0.999992	0.0652425	0.999994	0.158097	0.999959
Ankh	-0.201169	0.874833	-0.678406	0.109424	0.146638	0.846832	0.228209	0.766746	-0.832011	0.0192845	-0.0290513	0.967498	-0.0518011	0.978376	0.553645	0.571084	-0.70851	0.0911589	0.0907699	0.862329	0.476011	0.529698	0.0271473	0.996107	-0.019434	0.999983	-0.135381	0.999778	0.104243	0.940547	0.0056734	0.999992	0.00491536	0.999994	0.114284	0.999959
Ankib1	-0.314734	0.722933	-0.0428389	0.945876	0.0474953	0.960682	0.0870488	0.932031	-0.343815	0.338958	-0.527071	0.279026	0.287094	0.620444	-0.569055	0.46677	0.0979017	0.862448	0.4886	0.20153	0.188073	0.871102	-0.0537456	0.992391	0.100962	0.999983	-0.306245	0.999778	0.100597	0.932728	0.0700568	0.999992	0.00928476	0.999994	0.0601079	0.999959
Ankk1	-0.356626	NA	-0.563968	NA	-0.246079	NA	-0.127328	NA	0.309307	NA	-0.422816	NA	-0.00839018	NA	0.251146	NA	-0.503724	NA	-0.564054	NA	-0.102786	NA	-0.0533684	NA	-0.0246045	NA	-0.164027	0.999778	0.0589321	NA	-0.0480727	0.999992	-0.174324	NA	-3.00893	0.999959
Ankle1	0.364896	0.855397	1.20042	0.0580899	1.21664	0.108833	0.712725	0.464178	2.33522	4.48198e-06	0.219396	0.863687	0.212209	0.873183	0.00386136	0.998605	-0.0867432	0.917415	0.669981	0.329905	-0.176524	0.944548	-0.788957	0.423056	-0.139964	0.999983	-1.09388	0.999778	-0.34075	0.879059	0.334205	0.999992	-0.320717	0.999994	0.968221	0.999959
Ankle2	0.0265822	0.971741	-0.0707293	0.787412	-0.260798	0.186219	0.0317149	0.952287	-0.411272	0.00315911	-0.220889	0.31115	0.0354611	0.941436	-0.086218	0.964801	0.00287032	0.991377	0.0822439	0.716042	-0.00273055	0.995311	-0.212518	0.456732	0.0653589	0.999983	-0.0478809	0.999778	0.112518	0.742808	-0.0198003	0.999992	-0.111246	0.999994	-0.206249	0.999959
Ankmy1	0.256212	0.958819	-0.299253	0.852633	0.487271	NA	-0.0965246	0.99019	-0.659313	0.475916	0.0376513	0.980376	0.406512	NA	-0.780828	0.938936	-0.460012	NA	-1.6525	NA	0.379733	NA	-2.11402	0.375048	0.694303	0.999983	-0.746707	0.999778	-0.311946	0.925978	0.45999	0.999992	-0.135277	0.999994	0.386924	0.999959
Ankmy2	0.202338	0.563246	-0.0475433	0.893328	-0.172294	0.474642	0.228557	0.31986	0.26394	0.0937724	-0.0577332	0.866751	0.157081	0.579869	-0.241652	0.577403	-0.169145	0.428006	0.00132631	0.995452	-0.322726	0.186227	0.212196	0.492863	-0.0457789	0.999983	0.0169347	0.999778	0.296267	0.200898	-0.12447	0.999992	0.0770338	0.999994	-0.00600647	0.999959
Ankra2	-0.135401	0.811971	-0.151307	0.590463	-0.377075	0.116427	-0.233595	0.411868	-0.35737	0.0511237	0.0988494	0.778789	-0.412632	0.104253	0.0180881	0.989467	-0.119977	0.660485	-0.588293	0.00433733	-0.152571	0.763945	-0.0105137	0.996107	0.00275967	0.999983	-0.121849	0.999778	0.245534	0.441766	-0.0885245	0.999992	-0.0533385	0.999994	-0.082699	0.999959
Ankrd1	0.579781	0.831043	1.71368	0.0756713	-1.825	0.0951476	-0.753838	0.613215	3.27685	2.66705e-05	-0.956036	0.457538	-1.85443	0.563676	1.16385	0.965739	-1.07539	0.579054	0.903298	0.703369	-0.0796964	0.992151	-2.24803	0.541049	0.631015	0.999983	0.60242	0.999778	1.47832	0.421228	0.239882	0.999992	1.49278	0.999994	-0.291268	0.999959
Ankrd10	-0.375387	0.0398273	-0.42546	0.00259574	-0.106012	0.654658	-0.164691	0.448921	-0.57531	4.50287e-06	0.15447	0.464927	-0.239421	0.300656	0.103938	0.92607	0.145571	0.461365	0.0853666	0.694827	-0.228546	0.393391	-0.157365	0.635513	0.0767946	0.999983	0.218086	0.999778	-0.425573	0.0293588	0.168132	0.999992	0.107482	0.999994	0.0117017	0.999959
Ankrd11	-0.335769	0.673712	-0.097599	0.892448	0.468629	0.295074	0.346479	0.504057	-0.142219	0.737964	-0.473736	0.315526	0.858624	0.0339301	0.157638	0.979819	0.292907	0.486772	0.759385	0.0295769	0.176859	0.878079	-0.190422	0.870774	0.0327945	0.999983	-0.0997464	0.999778	0.397588	0.487309	-0.0708476	0.999992	0.137882	0.999994	0.00883199	0.999959
Ankrd12	-0.550772	0.389588	0.0828265	0.903017	0.298814	0.576568	-0.0307117	0.99019	-0.543403	0.104117	-0.365946	0.465591	0.329834	0.559747	0.118961	0.989467	0.881905	0.0172089	0.299882	0.477103	-0.234596	0.812011	0.0979036	0.955845	0.172209	0.999983	-0.165215	0.999778	0.461341	0.408633	-0.0590516	0.999992	0.0572596	0.999994	0.138938	0.999959
Ankrd13a	-0.0448487	0.956272	-0.0504558	0.858392	0.0663639	0.811298	0.383855	0.0191418	0.0930336	0.578369	-0.107607	0.646555	0.351227	0.0520336	0.187905	0.650035	-0.0597698	0.787816	0.292528	0.0613543	0.3137	0.121796	-0.178476	0.512505	-0.00479653	0.999983	0.0394887	0.999778	0.146452	0.604859	0.094008	0.999992	-0.0420031	0.999994	0.178523	0.999959
Ankrd13b	-0.367963	0.674797	-0.573363	0.169956	0.817108	0.0827814	0.0293946	0.99019	-0.317984	0.395846	-0.096588	0.916339	0.440519	0.597884	0.280783	0.919428	-0.0852979	0.892685	0.367403	0.51546	-0.259319	0.827559	-0.249644	0.850863	-0.178055	0.999983	-0.00673378	0.999778	0.0687943	0.958931	-0.0736916	0.999992	0.14713	0.999994	0.157045	0.999959
Ankrd13c	-0.248891	0.431701	-0.0884824	0.741483	-0.177659	0.458288	-0.126287	0.664265	-0.511463	0.00050489	-0.287785	0.217541	-0.0199152	0.985823	-0.0468808	0.989467	-0.201574	0.308666	-0.128153	0.53929	0.0771658	0.896883	-0.0945357	0.871311	0.0592421	0.999983	-0.216895	0.999778	-0.116041	0.744817	0.0230852	0.999992	-0.139188	0.999994	-0.0865293	0.999959
Ankrd13d	0.565023	0.239141	-0.143727	0.734084	0.396733	0.289411	0.223907	0.648608	-0.023077	0.95053	0.0889869	0.883271	-1.33032	0.0578102	-0.0208692	0.989467	-0.233678	0.703642	0.104321	0.883045	-0.214106	0.844656	0.223145	0.862774	-0.100723	0.999983	-0.00745143	0.999778	-0.306734	0.373296	-0.00716968	0.999992	0.0696457	0.999994	0.0344817	0.999959
Ankrd16	0.0224471	0.977825	0.316592	0.280528	0.103289	0.825956	0.0212317	0.99019	0.177683	0.496707	0.634135	0.0580285	-0.328673	0.407274	-0.382339	0.540761	-0.163345	0.645054	-0.388756	0.189553	-0.314226	0.515534	-0.0520742	0.980049	0.0943339	0.999983	-0.212583	0.999778	-0.0749649	0.935764	0.0152311	0.999992	0.336553	0.999994	0.22935	0.999959
Ankrd17	-0.247055	0.812118	0.200721	0.722732	0.233461	0.696601	0.239344	0.72077	-0.244601	0.540477	-0.568518	0.255768	0.806384	0.0667897	0.0965492	0.989467	0.428471	0.308678	1.01793	0.0051741	0.117242	0.934001	-0.25211	0.799894	0.123017	0.999983	-0.0767682	0.999778	0.51343	0.35045	-0.0556709	0.999992	0.0550977	0.999994	0.0663933	0.999959
Ankrd2	-0.595542	NA	0.467409	0.83429	1.21548	NA	0.216235	0.970284	-0.605136	0.679495	-0.577346	NA	-0.970186	NA	-0.710631	0.989467	-0.450729	NA	-0.564095	NA	-1.61006	NA	-1.01517	NA	-0.0949259	0.999983	0.553756	0.999778	-0.114375	0.996583	1.42928	0.999992	1.54293	0.999994	0.713224	0.999959
Ankrd22	-1.26877	0.768721	-0.401443	0.865669	-1.48758	0.430748	3.61012	0.124261	1.92625	0.293702	-0.867509	0.710292	-1.64036	0.163305	-0.0268179	0.993294	-0.119794	0.926746	-1.07153	0.289816	0.620311	0.807375	-0.00126543	0.99956	-0.0246063	0.999983	-0.164044	0.999778	0.0586936	0.996583	-0.908216	0.999992	-2.674	0.999994	-2.74537	0.999959
Ankrd23	-0.124475	0.971741	-0.0760317	0.944189	0.752823	0.359723	-0.104153	0.963883	0.185041	0.818276	-0.166621	0.904989	-0.753899	0.429356	0.0120634	0.995109	0.421804	0.620439	-0.306655	0.720276	-1.03391	0.292003	-0.429318	0.807335	0.0490891	0.999983	-0.938541	0.999778	-3.06342	1.49873e-06	0.460196	0.999992	-0.341989	0.999994	0.411082	0.999959
Ankrd24	0.00547321	0.996662	-0.155142	0.806149	0.470959	0.34461	0.381497	0.501645	-0.0305576	0.952239	0.496756	0.335826	0.25576	0.724951	-0.235429	0.934905	-0.0927714	0.882221	-0.0389715	0.942289	-0.447189	0.536628	-0.270743	0.781366	-0.130184	0.999983	0.0447085	0.999778	0.101299	0.933075	0.102636	0.999992	0.118926	0.999994	-0.102983	0.999959
Ankrd27	-0.0122747	0.984599	0.0932168	0.795392	0.390138	0.139118	0.452257	0.0747871	0.26776	0.193451	0.0420893	0.930745	0.585508	0.0196522	0.129998	0.942338	-0.378074	0.111445	0.465059	0.0387163	0.153325	0.786757	0.039052	0.984602	-0.189303	0.999983	-0.00529152	0.999778	-0.134425	0.786014	-0.0933804	0.999992	0.157311	0.999994	0.186352	0.999959
Ankrd28	-0.26582	0.594563	-0.127383	0.725754	-0.175364	0.633352	-0.434519	0.124593	-0.542543	0.00942626	-0.437596	0.178837	-0.000347626	0.999876	-0.120761	0.965739	-0.0634308	0.866811	-0.0618224	0.855774	0.102502	0.901022	-0.402918	0.224451	0.236265	0.999983	-0.238584	0.999778	0.251314	0.52357	-0.0328824	0.999992	0.0238048	0.999994	0.0842766	0.999959
Ankrd29	-0.285892	0.749764	-0.764534	0.0268338	-1.1161	0.00315813	-0.486326	0.284436	-1.17338	6.23081e-05	-0.84977	0.0577773	-0.451193	0.638926	0.149025	0.989467	0.533416	0.32625	-0.190377	0.799496	-1.17391	0.0303488	0.393462	0.732471	0.0266559	0.999983	0.0882817	0.999778	0.209659	0.786014	-0.142445	0.999992	-0.16676	0.999994	0.0145397	0.999959
Ankrd30a	-0.608837	0.486221	-0.319231	0.61863	0.51722	0.404121	-0.257647	0.771328	-0.805738	0.0514169	-0.65949	0.284082	-0.2023	0.844613	-0.218352	0.977256	1.44822	0.00350536	0.613048	0.288158	-0.290424	0.830028	0.123216	0.958637	0.304949	0.999983	-0.225667	0.999778	0.821533	0.172015	0.0879744	0.999992	0.0444686	0.999994	0.0450554	0.999959
Ankrd31	1.40748	NA	0.210897	0.942143	-0.313721	NA	-0.521901	0.896777	0.263761	0.922672	0.0859978	NA	-0.970186	NA	1.00971	0.967465	2.83928	NA	3.12372	NA	0.689992	NA	2.74653	NA	0.97558	0.999983	-0.17588	0.999778	0.833477	0.829457	-2.07118	0.999992	0.365118	0.999994	0.374567	0.999959
Ankrd33	-1.24995	0.182	-0.350014	0.692418	-0.262417	0.824789	-0.882006	0.267709	-0.525813	0.390437	-0.571117	0.525563	2.40466	0.389332	0.756952	0.940984	-0.472346	0.829985	1.29734	NA	-1.85295	0.445983	-1.40254	0.720332	0.178489	0.999983	-0.0148151	0.999778	-0.145514	0.95193	0.317833	0.999992	-0.667498	0.999994	0.243971	0.999959
Ankrd33b	-0.579578	0.622481	-0.747022	0.222397	0.0617064	0.960682	-0.0505703	0.99019	-0.741245	0.146674	-0.28857	0.74808	1.00837	0.498121	0.0245803	0.9909	2.27499	0.000672478	0.51508	0.53121	-0.597528	0.709431	2.39566	0.00109152	0.0158221	0.999983	-0.151011	0.999778	0.3408	0.769813	-0.112408	0.999992	0.290775	0.999994	0.0829547	0.999959
Ankrd34a	0.204166	0.929122	-0.406857	0.519416	1.21473	0.116005	0.0178485	0.99019	-0.180352	0.729374	-0.893166	0.17677	0.528553	0.664238	2.01659	0.00339876	1.068	0.0641155	1.111	0.0790264	-1.49495	0.0371062	-0.342214	0.84652	-0.105145	0.999983	-0.076387	0.999778	0.303487	0.538839	-0.0425344	0.999992	0.110926	0.999994	0.0625646	0.999959
Ankrd34b	1.5165	0.750455	0.0967431	0.975213	-1.20789	0.751423	0.75357	0.880017	2.16203	0.300552	-1.88475	0.491238	-0.00839079	0.999876	2.69371	0.574639	-1.37965	0.608797	-0.564095	0.855774	0.31036	0.968903	-3.2284	0.188795	0.197211	0.999983	-0.0400459	0.999778	0.622892	0.00507256	0.00967014	0.999992	-0.13684	0.999994	0.0208801	0.999959
Ankrd34c	-0.356651	0.971741	2.88099	0.137173	-0.251452	0.960682	-1.08913	0.823121	0.309329	0.93298	0.538949	0.922216	-0.00839079	0.999876	-0.534769	0.984793	0.0945504	0.970933	1.89095	0.334693	-1.57951	0.73207	-0.945552	0.91134	0.0318199	0.999983	-0.136229	0.999778	0.279084	0.606818	0.0982905	0.999992	0.177519	0.999994	0.341474	0.999959
Ankrd35	0.570047	0.413669	0.123779	0.860617	0.338139	0.545187	0.485639	0.35635	0.712527	0.0324473	0.0847081	0.927753	-0.393955	0.621839	-0.933918	0.218803	0.579219	0.277198	0.149061	0.854661	-0.195715	0.898501	0.673766	0.352162	-0.0385126	0.999983	0.0616444	0.999778	-0.234859	0.775212	-0.14965	0.999992	-0.498004	0.999994	-0.114373	0.999959
Ankrd37	-0.18517	0.911565	0.713174	0.141206	0.540686	0.36338	0.420493	0.536202	0.239342	0.628625	0.918379	0.143911	-0.542164	0.452684	0.569738	0.710717	0.247842	0.764552	-1.23832	0.0263278	0.456914	0.703413	0.921843	0.277686	0.181159	0.999983	0.844839	0.999778	-0.508933	0.514863	0.0094481	0.999992	0.0362172	0.999994	-0.124703	0.999959
Ankrd39	-0.0153262	0.986714	-0.118816	0.816302	-0.157149	0.761039	0.0265669	0.99019	0.161795	0.626731	0.211839	0.652532	-0.51278	0.221361	-0.0197447	0.989467	-0.294223	0.446837	-0.585272	0.0799104	0.57194	0.191974	-0.166238	0.888367	-0.0680398	0.999983	-0.0978527	0.999778	0.170801	0.809925	-0.147176	0.999992	0.0470823	0.999994	-0.169538	0.999959
Ankrd40	-0.163995	0.579273	-0.342159	0.0138038	-0.0859182	0.716056	-0.0580334	0.857463	-0.500789	3.01171e-05	-0.0912217	0.686524	0.155382	0.509479	0.0975554	0.925551	0.019761	0.926117	0.0101061	0.960992	-0.0688631	0.893415	-0.0647839	0.917002	-0.0987443	0.999983	-0.0120872	0.999778	-0.0971044	0.741061	-0.0235568	0.999992	-0.176846	0.999994	0.0913902	0.999959
Ankrd40cl	-0.14159	0.972739	0.74205	0.590309	1.45288	0.354023	-0.336901	0.908962	-2.87	0.0758594	1.56797	0.385953	-0.176417	0.839383	-0.227337	0.965739	-0.395475	0.449524	-0.229198	0.677308	-0.14102	0.933992	-0.433071	0.624207	-0.0246063	0.999983	-1.60682	0.999778	0.0587659	0.996583	-0.0480762	0.999992	-0.174343	0.999994	0.671797	0.999959
Ankrd42	-0.136836	0.887625	0.0391874	0.940128	-0.059051	0.931317	-0.106513	0.877187	-0.376938	0.167317	-0.13444	0.792832	0.145668	0.834736	0.0863193	0.989467	-0.525954	0.150369	0.112922	0.800184	0.263076	0.703525	0.671297	0.102383	0.0417771	0.999983	0.000835716	0.999778	0.638709	0.079723	-0.262052	0.999992	0.179097	0.999994	0.179359	0.999959
Ankrd44	0.0352705	0.977175	0.0545044	0.936107	-0.396056	0.449709	-0.141507	0.874335	-0.433681	0.240283	-1.11295	0.0111536	0.0512071	0.978341	-0.365629	0.805038	0.671221	0.104233	0.3338	0.459961	-0.0261004	0.992151	0.613958	0.277686	0.261421	0.999983	-0.0253867	0.999778	0.106942	0.935232	0.0243846	0.999992	0.0383104	0.999994	0.0865199	0.999959
Ankrd45	-0.286864	0.805814	-0.637279	0.179296	-0.563344	0.289163	0.00358041	0.996638	-0.734264	0.0582049	-0.323785	0.594283	0.414166	0.906894	-0.646128	0.90599	0.182783	0.907642	-2.14627	0.210417	0.217956	0.95413	-2.94436	0.230972	0.106515	0.999983	-0.114802	0.999778	0.290435	0.663738	-0.0505314	0.999992	0.240005	0.999994	0.164772	0.999959
Ankrd46	-0.00227647	0.997037	-0.490477	0.0071843	-0.217463	0.394418	-0.199306	0.475636	-0.205284	0.271692	0.216642	0.409972	-0.125626	0.721391	0.109176	0.954669	-0.295949	0.170082	-0.333318	0.101192	-0.224247	0.555524	7.58643e-05	0.999801	-0.0890644	0.999983	0.0985605	0.999778	-0.101516	0.821813	-0.0263865	0.999992	0.172471	0.999994	0.0156156	0.999959
Ankrd49	0.10662	0.827505	-0.0618526	0.840192	-0.190741	0.407221	0.157283	0.542203	-0.261279	0.0968052	0.217352	0.356359	0.00645005	0.999876	-0.151019	0.855098	-0.159277	0.482435	-0.0842299	0.739554	0.0301517	0.981783	0.1149	0.831243	0.0156126	0.999983	-0.238022	0.999778	0.168227	0.630886	0.027946	0.999992	-0.262658	0.999994	0.0661119	0.999959
Ankrd50	-0.161319	0.913247	-0.773122	0.0559262	-0.0780988	0.932795	0.388869	0.508403	-0.539798	0.146302	-0.930952	0.0708814	0.835141	0.0798245	0.479949	0.663854	-0.104212	0.8694	0.228451	0.640723	0.186211	0.89144	0.176195	0.91134	0.0754062	0.999983	-0.0700506	0.999778	-0.00528378	0.996583	-0.0318284	0.999992	0.133535	0.999994	0.0516101	0.999959
Ankrd52	-0.157381	0.888501	0.0544231	0.929971	0.443141	0.309191	0.459162	0.302916	0.250468	0.478713	-0.339563	0.46867	0.53483	0.236306	0.0549191	0.989467	0.299924	0.463134	0.858414	0.0117883	0.228321	0.799796	-0.0749475	0.97162	-0.129399	0.999983	0.172481	0.999778	0.154259	0.862218	0.0103361	0.999992	-0.0456459	0.999994	0.0981821	0.999959
Ankrd53	-0.356651	0.971741	1.87841	0.456777	-0.246097	0.960682	-0.127338	0.99019	3.73617	0.0218948	0.538949	0.922421	0.13309	0.888507	0.338994	0.873093	-0.393682	0.441579	-0.187313	0.739261	0.209132	0.883787	-0.597597	0.379556	-0.0246063	0.999983	-0.164044	0.999778	0.0586427	0.996583	-0.0480762	0.999992	-0.174343	0.999994	-0.289998	0.999959
Ankrd54	0.357986	0.454305	-0.185766	0.598701	0.330703	0.309625	0.155989	0.745636	0.186514	0.481733	0.532705	0.124574	0.10598	0.838576	0.0345231	0.989467	-0.362614	0.21736	-0.550168	0.036198	-0.218073	0.716199	0.00241786	0.997949	-0.00699437	0.999983	0.0324363	0.999778	-0.336188	0.40931	0.00758364	0.999992	0.128694	0.999994	0.127962	0.999959
Ankrd55	0.883721	0.0973616	0.381838	0.441709	-0.028131	0.971366	0.444202	0.419548	-0.3558	0.390437	0.060463	0.934777	-0.00238046	0.999876	-0.312192	0.893238	0.564597	0.27783	-0.686737	0.179507	-0.0795932	0.979699	0.169293	0.934737	-0.102316	0.999983	0.502508	0.999778	0.88906	0.0594928	0.0611259	0.999992	0.12427	0.999994	-0.17654	0.999959
Ankrd6	0.233965	0.878501	-0.553433	0.306127	-0.437253	0.509545	-0.0729174	0.970752	-0.814541	0.0576311	-0.242705	0.754646	-0.0298797	0.999876	0.253702	0.963877	1.58548	0.00473753	0.6782	0.29903	-0.148598	0.934001	-0.345326	0.801333	0.267448	0.999983	0.149469	0.999778	0.179304	0.872692	0.173757	0.999992	-0.0406364	0.999994	0.164922	0.999959
Ankrd60	-2.22161	NA	-0.563968	NA	-0.246079	NA	-0.127328	NA	-0.652419	NA	-0.422816	NA	-0.00839018	NA	2.0713	NA	-0.503724	NA	0.397672	NA	-0.102786	NA	0.908358	NA	-0.0246045	NA	-0.164027	0.999778	0.0594349	NA	0.913653	0.999992	-0.174324	NA	1.75247	0.999959
Ankrd61	0.564685	NA	-1.21126	NA	-2.13905	NA	-0.127328	NA	-0.541154	NA	-2.00368	NA	-0.00839018	NA	-1.32764	NA	0.458002	NA	-0.564054	NA	-0.102786	NA	-0.0533684	NA	-0.0246045	NA	-0.164027	0.999778	0.0600594	NA	-0.0480727	0.999992	1.32745	NA	-0.289977	0.999959
Ankrd63	0.720463	0.727665	-0.397788	0.761005	-0.203019	0.905658	-0.368891	0.832833	-0.631614	0.47395	0.409972	0.767508	-1.93994	0.0825837	-0.86552	0.771074	1.70819	0.102509	-0.576796	0.615595	-0.646536	0.774082	-1.14796	0.483141	0.0471178	0.999983	0.0332962	0.999778	0.212794	0.935764	0.119915	0.999992	-0.0409264	0.999994	-0.00549031	0.999959
Ankrd65	-0.265963	0.886289	-1.22533	0.0316396	-0.271131	0.772432	-0.791079	0.273476	-1.72565	0.000503153	0.149701	0.903553	-1.32232	0.629464	-1.65397	0.662728	0.478684	0.798298	-4.02711	0.0268291	-2.33445	0.145597	-1.07631	0.769878	-0.197345	0.999983	-0.436599	0.999778	0.22269	0.894521	0.0358022	0.999992	-0.440247	0.999994	-0.0814926	0.999959
Ankrd66	0.01331	0.992473	-0.43493	0.450619	0.0385825	0.964808	-0.2829	0.73758	-0.610435	0.154068	0.817442	0.185839	-1.83866	0.582876	-0.164416	0.989467	-0.50376	0.882221	-2.96834	0.150441	0.65024	0.900511	-2.49289	0.45635	0.0655796	0.999983	0.383379	0.999778	1.03523	0.0829701	-0.0293215	0.999992	0.301432	0.999994	0.828718	0.999959
Ankrd9	0.910543	0.58055	-0.277006	0.827142	1.60777	0.0729339	-0.1921	0.929324	0.874737	0.194518	0.598286	0.590614	0.483872	0.675878	0.293737	0.984793	-0.492106	0.569543	-0.235117	0.805014	-0.272539	0.91705	0.748449	0.560105	-0.384865	0.999983	0.0227115	0.999778	-0.908872	0.410812	0.00342332	0.999992	-0.207966	0.999994	-0.403793	0.999959
Anks1a	0.0519104	0.971741	-0.254886	0.491018	0.796978	0.0136267	0.7952	0.00733468	-0.347866	0.203867	0.346171	0.372721	0.422046	0.282252	-0.128872	0.982211	0.25863	0.461386	0.781016	0.00779371	-0.131274	0.894563	0.185814	0.825405	-0.052075	0.999983	0.240327	0.999778	-0.0291479	0.996583	0.103883	0.999992	-0.0366252	0.999994	0.174402	0.999959
Anks1b	-0.903438	0.874531	-1.06081	0.524612	-0.473676	0.809679	-1.51987	0.249938	-1.26206	0.33085	1.28782	0.397421	1.00071	0.739485	0.918862	0.794274	0.506704	0.666756	2.34512	0.118378	0.137159	0.981783	1.0234	0.518278	0.0714579	0.999983	-0.164438	0.999778	0.170065	0.281478	0.0104622	0.999992	0.0952568	0.999994	-0.0609225	0.999959
Anks3	-0.0972591	0.93484	-0.178147	0.649827	0.28056	0.462121	0.274325	0.503801	-0.12235	0.701198	0.269179	0.486723	0.108502	0.860497	-0.0789505	0.989467	-0.138158	0.737264	-0.162856	0.66418	-0.226076	0.742013	0.0331172	0.996107	-0.10109	0.999983	0.384687	0.999778	-0.449651	0.2716	0.150741	0.999992	-0.0433846	0.999994	0.209591	0.999959
Anks4b	-0.356651	0.971741	-0.564008	0.90176	1.61359	0.619947	-1.08913	0.825192	0.309329	0.93298	-0.422847	0.930745	-0.17328	0.852801	-0.519257	0.715106	-0.0955899	0.885946	-0.281835	0.614779	-0.350121	0.758859	0.33607	0.77355	0.989845	0.999983	-0.583955	0.999778	0.82273	0.654265	-0.617623	0.999992	-3.17128	0.999994	-2.81688	0.904593
Anks6	0.24938	0.854067	-0.228398	0.727768	0.910556	0.0753716	0.73342	0.175714	0.110417	0.8494	0.316325	0.628589	-0.875806	0.22074	0.105681	0.989467	0.946048	0.086202	0.222301	0.744726	-0.235907	0.891004	0.690811	0.365102	-0.0947686	0.999983	0.282626	0.999778	-0.523667	0.445156	0.34232	0.999992	-0.0786594	0.999994	-0.271243	0.999959
Ankub1	0.447449	0.576397	0.376423	0.441874	-0.0546034	0.960682	0.328477	0.586588	-0.185819	0.678272	0.210936	0.752136	-0.0733885	0.988727	-0.889834	0.398218	1.08765	0.0641428	0.158498	0.855774	0.00451739	0.997414	1.11216	0.145026	0.0813164	0.999983	0.213911	0.999778	0.523402	0.347187	0.217395	0.999992	0.347374	0.999994	0.773339	0.999959
Ankzf1	0.0839884	0.913194	-0.368255	0.086934	0.165409	0.592108	0.0620171	0.902388	-0.412903	0.0235558	0.0250853	0.946069	-0.0218287	0.988628	-0.0867607	0.985171	-0.774123	0.000164834	-0.324652	0.132637	-0.342704	0.260906	-0.446282	0.0808336	0.0559243	0.999983	0.107419	0.999778	0.0880973	0.881311	0.162061	0.999992	-0.209815	0.999994	-0.0485064	0.999959
Anln	-0.0909128	0.971741	1.16262	0.0366312	0.655773	0.379288	0.096903	0.963104	2.0787	7.94651e-06	0.142491	0.914776	0.208543	0.855815	-0.438727	0.873093	0.902135	0.133457	1.19592	0.0349619	0.512552	0.681794	-0.297431	0.873645	0.0747065	0.999983	-0.273625	0.999778	0.717173	0.396706	0.304622	0.999992	-0.0819542	0.999994	0.164427	0.999959
Ano1	-0.194819	0.874833	-0.711957	0.076112	0.540072	0.266066	0.331948	0.582779	-1.02085	0.0022985	-0.139975	0.849417	-0.191	0.821415	0.445626	0.720823	0.725425	0.091796	0.636363	0.14651	-0.860446	0.09438	-0.0492477	0.996107	0.216735	0.999983	0.312388	0.999778	-0.184501	0.866507	0.237151	0.999992	-0.422959	0.999994	-0.102949	0.999959
Ano10	0.087163	0.962391	-0.393496	0.302885	-0.300899	0.514764	0.0533477	0.9667	-0.355289	0.262307	-0.0657627	0.930745	0.387848	0.388467	0.435658	0.589447	-1.17248	0.000216	-0.249412	0.506278	0.192846	0.83763	-0.375115	0.512783	-0.0187629	0.999983	-0.102422	0.999778	0.00938011	0.996583	-0.0516406	0.999992	0.0330948	0.999994	0.137213	0.999959
Ano2	-0.109303	0.971741	-1.08447	0.235038	-0.62493	0.626128	0.491166	0.783663	-1.22984	0.188097	-0.161876	0.930878	0.647975	0.575125	-0.0287276	0.989787	-0.881415	0.270002	0.0706303	NA	-0.575007	0.754485	0.177444	0.97315	-0.125705	0.999983	-0.61575	0.999778	-0.0255013	0.996583	0.467156	0.999992	0.963726	0.999994	1.52515	0.999959
Ano3	-0.356651	0.971741	-0.564008	0.90176	-0.246097	0.960682	-2.98663	0.204976	-1.53483	0.493031	0.538949	0.922216	-0.970186	0.834736	2.1061	0.781706	-1.37357	0.611827	-0.564095	0.855774	-0.102793	0.992151	-0.0533722	0.996107	0.481022	0.999983	-0.316389	0.999778	0.468331	0.242688	0.137503	0.999992	0.29653	0.999994	-0.116039	0.999959
Ano4	-0.645629	0.434812	-1.22158	0.0033947	-0.251874	0.747911	-0.493876	0.433368	-1.72964	3.90201e-05	-0.0107805	0.988464	0.0159951	0.999876	-0.313321	0.977373	-0.619101	0.511491	-1.56466	0.14141	-0.397622	0.851336	0.291689	0.924272	0.159729	0.999983	-0.053218	0.999778	0.0563318	0.978328	-0.126251	0.999992	-0.0290324	0.999994	-0.00460756	0.999959
Ano5	1.00753	0.862793	3.25776	0.140728	-2.43928	NA	-0.434767	0.935611	1.5176	0.422541	-2.20616	0.409206	1.89448	NA	1.21296	0.985171	-0.50376	NA	-2.37552	NA	0.549931	NA	-1.48162	0.863483	0.253353	0.999983	1.13221	0.999778	-1.15105	0.775899	-0.278308	0.999992	-0.059157	0.999994	0.67039	0.999959
Ano6	-0.28139	0.95755	-0.224158	0.902848	0.130186	0.960682	0.0782894	0.99019	-0.469675	0.677123	-0.391052	0.826627	0.123641	0.97901	-2.26003	0.122169	1.54101	0.137149	0.258054	0.854875	-0.711274	0.770386	1.06063	0.548663	0.0934635	0.999983	-0.152093	0.999778	0.192401	0.965514	0.136292	0.999992	0.148886	0.999994	0.0700291	0.999959
Ano7	0.126962	0.925686	-0.218171	0.652033	0.31736	0.499939	-0.0268518	0.99019	-0.2758	0.420669	0.333955	0.475146	-0.501773	0.252388	-0.539491	0.439743	-0.171586	0.704101	0.634243	0.0596104	0.631561	0.16455	0.396699	0.490609	-0.0866627	0.999983	-0.00934708	0.999778	0.0186022	0.996583	-0.0518559	0.999992	0.297575	0.999994	0.192544	0.999959
Ano8	-0.0715595	0.971741	-0.100987	0.867879	0.48294	0.230945	0.308373	0.52832	0.0163623	0.966079	0.300246	0.506089	0.347436	0.558047	-0.0477043	0.989467	0.204648	0.664562	0.72434	0.0788016	-0.0775166	0.963924	-0.0130642	0.996107	-0.256455	0.999983	-0.0530698	0.999778	-0.158781	0.83612	-0.00210068	0.999992	0.100896	0.999994	0.108661	0.999959
Ano9	-0.227179	0.806351	0.82541	0.00660054	0.0515918	0.955397	0.0653535	0.955747	0.390395	0.183038	0.0713413	0.930745	-0.115259	0.837401	-0.199329	0.90477	-0.42676	0.168079	0.0147008	0.968225	0.172214	0.831348	0.128383	0.910856	1.82927	0.999983	-0.164044	0.999778	0.0588119	0.996583	-0.0480762	0.999992	-0.174343	0.999994	0.671797	0.999959
Anp32a	0.195974	0.734896	-0.0520202	0.904194	-0.286646	0.338211	-0.0962222	0.85189	0.0764134	0.79645	0.0164892	0.967673	-0.209106	0.562176	-0.0775676	0.989467	0.203262	0.460771	0.160847	0.563323	-0.0409756	0.980241	0.324535	0.372422	-0.101397	0.999983	-0.00213354	0.999778	0.382003	0.227858	0.0508051	0.999992	-0.0285828	0.999994	-0.00487621	0.999959
Anp32b	0.187174	0.793769	0.416662	0.140254	-0.278863	0.432952	-0.364053	0.289612	0.734879	0.00109869	0.361932	0.304951	-0.301467	0.411791	-0.138483	0.963877	0.063718	0.881027	-0.263525	0.362298	0.0115801	0.992151	0.0458527	0.984958	-0.0222493	0.999983	0.0800968	0.999778	0.402243	0.291001	-0.0692408	0.999992	-0.0522547	0.999994	0.103523	0.999959
Anp32e	-0.079217	0.925686	0.19619	0.463049	-0.108598	0.761817	-0.338684	0.194864	0.103229	0.669021	0.00353548	0.991705	-0.0959261	0.827223	-0.19266	0.822385	0.31783	0.169995	0.323393	0.150371	0.253671	0.530025	-0.00201369	0.997949	0.0217413	0.999983	-0.122608	0.999778	0.370154	0.19503	0.00188714	0.999992	-0.143061	0.999994	0.0539678	0.999959
Antkmt	-0.0811271	0.971741	0.00233481	0.996648	0.883642	0.0451917	0.0769892	0.950191	0.688795	0.0410483	0.483727	0.347645	-0.28821	0.644534	0.334339	0.839394	-0.481035	0.262627	-0.673688	0.083675	-0.0224818	0.992151	-0.0867709	0.970039	-0.142941	0.999983	0.0255395	0.999778	-0.172956	0.862849	0.188917	0.999992	-0.145376	0.999994	0.000818504	0.999959
Antxr1	-0.189166	0.833308	-0.35075	0.338448	-0.140807	0.794447	-0.0213685	0.99019	-0.274301	0.375894	-0.586966	0.159827	0.384777	0.395628	-0.0865879	0.989467	0.906132	0.00380459	0.613025	0.0595119	-0.494714	0.300399	0.122398	0.920811	0.0372277	0.999983	-0.0443983	0.999778	0.09268	0.924918	-0.0997347	0.999992	0.0760393	0.999994	0.0909682	0.999959
Antxr2	-0.161243	0.855617	-0.425026	0.184923	-0.416679	0.249986	-0.0271216	0.99019	-0.798784	0.00140331	-0.67777	0.0743839	0.201664	0.701958	-0.0270719	0.989467	0.716728	0.0183009	0.336779	0.320217	-0.479231	0.289191	0.0443546	0.992957	-0.0173421	0.999983	-0.155128	0.999778	0.139054	0.880898	0.00214311	0.999992	0.232532	0.999994	-0.33462	0.999959
Anxa1	-0.084811	0.971741	-0.053738	0.943025	-0.618178	0.244204	-0.217395	0.807373	0.186388	0.713532	0.101958	0.922216	-0.585533	0.308403	0.230576	0.963182	0.273065	0.618401	-1.12241	0.00730791	-0.180964	0.905425	1.30898	0.00385804	0.105306	0.999983	-0.017851	0.999778	-0.415491	0.587499	-0.051232	0.999992	0.234954	0.999994	0.178692	0.999959
Anxa10	-0.288078	0.97938	-0.408892	0.949341	-0.26373	0.970791	-0.143783	0.99019	-14.9118	1.15692e-06	-0.410834	0.94988	-0.719349	0.920954	3.93805	0.592792	-7.90396	0.00694017	-1.0166	0.798464	5.76537	0.146361	2.67004	0.667206	-0.971133	0.999983	0.799643	0.999778	-1.39418	0.874709	0.211427	0.999992	2.02646	0.999994	-0.623919	0.999959
Anxa11	0.171234	0.898819	-0.139845	0.840081	0.0719088	0.939286	0.376957	0.515216	-0.0920593	0.867331	-0.0518636	0.941164	0.205561	0.776801	-0.768391	0.263833	0.332074	0.470826	-0.243003	0.601701	-0.0647375	0.982426	1.54075	3.53117e-05	-0.0971162	0.999983	-0.0488357	0.999778	-0.000357839	0.999731	0.0303389	0.999992	0.272909	0.999994	0.0303108	0.999959
Anxa13	1.56474	0.760842	-1.07757	0.593368	-1.72121	0.574059	-4.13021	0.0486576	-1.45669	0.411039	0.880414	0.773081	0.0774973	0.988084	-0.285626	0.989467	-0.373289	0.701833	-0.551135	0.516558	-0.162357	0.965048	-0.48564	0.807918	-1.38053	0.999983	-0.162238	0.999778	0.756582	0.85547	-2.25726	0.999992	1.86599	0.999994	-0.289998	0.999959
Anxa2	0.232267	0.696218	0.128994	0.741806	-0.2944	0.376193	0.334574	0.318503	0.597313	0.00683145	-0.0641881	0.914102	-0.101294	0.837401	-0.350522	0.570462	-0.595704	0.0190789	-0.366485	0.159506	-0.0155783	0.992151	0.50944	0.111176	0.280487	0.999983	0.290887	0.999778	-0.301331	0.485833	0.298805	0.999992	0.151231	0.999994	-0.12975	0.999959
Anxa3	-0.0642419	0.976612	-0.125649	0.920376	-0.493396	0.631111	-0.204994	0.90135	-0.120643	0.910973	0.121515	0.930745	-0.643091	0.524989	0.465336	0.910196	-0.586824	0.465015	-0.163744	0.855859	1.81952	0.0190266	0.939083	0.376943	0.0495863	0.999983	0.267392	0.999778	0.169866	0.94446	0.301854	0.999992	0.183771	0.999994	0.157432	0.999959
Anxa4	0.0857923	0.971741	0.328888	0.537261	0.162904	0.824672	0.147754	0.875264	0.383892	0.336282	0.397612	0.475146	-0.42034	0.467383	-0.956284	0.100501	-0.0431722	0.93743	0.0921147	0.861225	-0.302277	0.758792	0.493191	0.467571	9.70528e-05	0.999983	-0.01045	0.999778	-0.224488	0.816952	-0.301823	0.999992	0.232093	0.999994	-0.0691698	0.999959
Anxa5	-0.0638354	0.94991	-0.308164	0.168936	-0.298091	0.240538	-0.103122	0.809879	-0.55133	0.00178825	-0.211346	0.454416	-0.103992	0.80701	-0.0600953	0.989467	0.40194	0.0688178	-0.0257493	0.927689	-0.556527	0.0217631	0.114587	0.871683	-0.142497	0.999983	0.0118157	0.999778	0.416606	0.110856	0.00260765	0.999992	-0.104451	0.999994	-0.128273	0.999959
Anxa6	0.0383741	0.971741	0.0502062	0.924045	-0.0682213	0.908994	-0.35007	0.36241	0.134495	0.681006	-0.323303	0.399145	0.0499163	0.957636	-0.0776162	0.989467	0.517097	0.0851332	0.364384	0.234834	-0.735686	0.0271001	0.120262	0.915171	0.0772199	0.999983	-0.0653236	0.999778	0.0862725	0.921715	-0.0866521	0.999992	-0.068473	0.999994	-0.207864	0.999959
Anxa7	-0.024949	0.979725	-0.157504	0.769586	-0.171219	0.764055	-0.0661179	0.952171	-0.254084	0.469258	0.150413	0.79922	-0.0219459	0.999876	0.404051	0.665561	-0.832581	0.0134825	-0.651551	0.0518325	0.19773	0.841038	0.361091	0.560928	-0.00508326	0.999983	0.0123083	0.999778	-0.06149	0.971624	-0.0954694	0.999992	0.0626748	0.999994	0.175908	0.999959
Anxa9	-1.65781	0.535015	0.404864	0.819435	-1.55867	NA	1.01526	0.549481	-0.868151	0.410974	-1.26042	0.39197	-0.970186	NA	3.31219	0.387222	0.39141	NA	-0.521602	NA	0.870484	NA	-1.8819	NA	0.66196	0.999983	-0.141636	0.999778	-1.05425	0.547159	-1.65079	0.999992	0.272567	0.999994	0.0834193	0.999959
Aoah	1.67906	0.023861	2.25597	7.54374e-05	-0.135583	0.927343	0.530897	0.602808	2.61165	8.32806e-07	0.416206	0.684634	-0.0662598	0.988727	-1.00847	0.466903	0.384475	0.641608	0.0588133	0.945638	-0.265811	0.908132	0.357398	0.866159	2.75139	0.762257	-0.577752	0.999778	1.56633	0.515934	2.44151	0.999992	0.190729	0.999994	0.273873	0.999959
Aopep	0.363197	0.661687	-0.0509368	0.937353	0.226648	0.703716	0.0595116	0.967527	0.642183	0.0529694	0.307914	0.565236	-0.257684	0.700144	0.241541	0.930089	-0.330839	0.474635	-0.400732	0.356251	-0.356647	0.672105	-0.142011	0.925776	-0.238591	0.999983	-0.123286	0.999778	-0.502187	0.419794	0.198753	0.999992	0.108255	0.999994	0.148166	0.999959
Ap1ar	-0.442734	0.368692	-0.144527	0.743041	-0.240621	0.565683	-0.159684	0.773058	-0.295182	0.288813	-0.175486	0.696517	-0.156178	0.766767	-0.116846	0.987555	0.428429	0.165022	-0.256803	0.421557	-0.0969713	0.927004	-0.559625	0.127513	-0.00623362	0.999983	-0.141962	0.999778	0.163418	0.797371	-0.0476446	0.999992	0.0976316	0.999994	0.0495858	0.999959
Ap1b1	0.00281361	0.997843	0.181746	0.701758	0.222781	0.652339	0.245564	0.638285	0.290673	0.362596	-0.0794648	0.916829	0.36345	0.411438	0.132156	0.986119	-0.133796	0.762198	-0.305212	0.384166	-0.0313355	0.992151	-0.449422	0.358071	-0.0296256	0.999983	0.0621357	0.999778	-0.448014	0.339802	-0.0493247	0.999992	0.049259	0.999994	0.00342346	0.999959
Ap1g1	-0.221286	0.604544	0.0642328	0.867349	-0.308268	0.217501	-0.0711872	0.881392	-0.45102	0.0113945	-0.50207	0.0524449	0.0763248	0.853169	-0.133932	0.920601	0.0220447	0.93743	0.0186767	0.944533	0.123061	0.831906	-0.0680959	0.935904	0.0800578	0.999983	-0.081495	0.999778	0.124464	0.777968	-0.0478402	0.999992	-0.0141621	0.999994	0.0849438	0.999959
Ap1g2	0.261483	0.66709	0.196788	0.594844	0.474177	0.136996	0.537567	0.086389	0.240129	0.372744	0.319671	0.380481	0.219415	0.604624	0.0971496	0.989467	-0.582268	0.0341262	-0.379505	0.172497	-0.192171	0.775465	-0.391135	0.332146	-0.029417	0.999983	0.115692	0.999778	-0.427202	0.295927	0.0200098	0.999992	0.115042	0.999994	-0.323781	0.999959
Ap1m1	0.236354	0.704804	0.0758712	0.884948	0.581349	0.0573243	0.546696	0.0684623	0.391893	0.103357	0.090588	0.858931	0.0294977	0.986651	-0.0168201	0.989467	-0.0566383	0.882375	0.0408385	0.907477	-0.0678831	0.952854	-0.00972989	0.996107	-0.0924647	0.999983	-0.0365872	0.999778	-0.151616	0.796162	0.0124543	0.999992	0.175826	0.999994	0.0296139	0.999959
Ap1m2	0.0130191	0.98908	-0.225075	0.609719	0.014034	0.980252	0.344145	0.445705	-0.340671	0.268557	0.337499	0.43604	-0.0779175	0.919123	-0.149328	0.972047	-0.680563	0.0339364	-0.514824	0.105289	-0.165586	0.867428	-0.0929997	0.947113	-0.0723505	0.999983	-0.186538	0.999778	-0.161005	0.885444	0.058395	0.999992	0.142073	0.999994	-0.279332	0.999959
Ap1s1	0.0654055	0.971741	0.116841	0.837158	0.1479	0.793315	-0.0146868	0.99019	0.832025	0.00271558	0.562888	0.197548	-0.500485	0.225769	0.280354	0.839394	-0.606316	0.0696893	-0.626755	0.0494231	-0.0892765	0.946965	0.184487	0.853962	-0.134317	0.999983	0.0191282	0.999778	-0.313241	0.5765	-0.045481	0.999992	0.0772952	0.999994	0.036086	0.999959
Ap1s2	0.132853	0.900821	0.607698	0.0507318	-0.356047	0.378071	-0.325199	0.458773	-0.0173537	0.963334	-0.23202	0.611168	-0.90555	0.00991305	0.00728922	0.994107	0.368243	0.301006	-0.65248	0.0468218	-0.115921	0.921084	-0.155836	0.897818	0.131461	0.999983	-0.150539	0.999778	0.47286	0.281195	-0.014696	0.999992	-0.689255	0.999994	-0.16959	0.999959
Ap1s3	-0.387744	0.774701	0.479527	0.462202	-1.30036	0.0268816	-0.621671	0.378725	-1.15951	0.0102853	-0.181515	0.854167	-0.356861	0.677193	0.368583	0.899663	-0.036403	0.960273	-0.788322	0.137911	-0.0251402	0.992151	-1.25409	0.0356817	0.780653	0.999983	-0.0238568	0.999778	0.241925	0.877128	0.335542	0.999992	0.861519	0.999994	0.00725523	0.999959
Ap2a1	0.14116	0.85862	-0.00201432	0.995849	0.622487	0.0370202	0.564743	0.0517245	0.27037	0.282541	-0.0279167	0.95123	0.422023	0.208213	0.0782536	0.989467	-0.199744	0.533113	0.191664	0.530637	0.0230451	0.992151	-0.110216	0.914269	-0.0826145	0.999983	-0.0780156	0.999778	-0.23503	0.60938	-0.0543755	0.999992	0.140502	0.999994	0.0073564	0.999959
Ap2a2	0.0697733	0.945658	0.388032	0.0872763	-0.206358	0.498811	0.0720388	0.890592	0.351677	0.0765259	-0.14715	0.662271	0.260079	0.386041	-0.130317	0.941287	-0.369833	0.107008	-0.0401345	0.89188	-0.0651221	0.940308	-0.32146	0.323903	-0.0953504	0.999983	-0.0745798	0.999778	-0.175482	0.668155	-0.0817893	0.999992	0.110732	0.999994	0.0816608	0.999959
Ap2b1	-0.0441802	0.971741	-0.280825	0.210204	-0.0176987	0.963867	0.184942	0.543045	-0.260941	0.16906	-0.444693	0.0955554	0.320003	0.220377	-0.122843	0.938694	0.00516877	0.985785	-0.0453015	0.865397	-0.299994	0.349337	-0.292349	0.339617	0.0281777	0.999983	-0.0368095	0.999778	0.0464903	0.950958	-0.0971732	0.999992	0.160171	0.999994	0.0353826	0.999959
Ap2m1	0.0597077	0.962391	0.313793	0.207916	0.171134	0.611369	0.0251777	0.99019	0.48327	0.0143316	0.282163	0.349369	-0.129766	0.747636	0.0681938	0.989467	-0.324983	0.178924	-0.285302	0.225868	-0.0647597	0.943928	-0.0844407	0.923719	-0.087196	0.999983	-0.0193562	0.999778	-0.0945149	0.878262	-0.0894175	0.999992	0.103452	0.999994	0.0533713	0.999959
Ap2s1	0.501794	0.575033	0.724854	0.114995	0.356899	0.575739	0.214163	0.817562	1.43403	8.36403e-05	0.758504	0.197548	-0.364673	0.588336	0.264614	0.937155	-0.708082	0.122848	-0.839517	0.0511894	-0.204242	0.890571	0.043441	0.996107	-0.204923	0.999983	0.0399822	0.999778	-0.809703	0.150977	-0.0378351	0.999992	-0.0832164	0.999994	-0.0821225	0.999959
Ap3b1	0.0343656	0.971741	0.237331	0.355349	-0.045136	0.926079	0.130327	0.742422	-0.059251	0.836524	-0.498092	0.0745582	0.440342	0.0888636	-0.183887	0.846422	0.0810511	0.793457	0.299555	0.18771	-0.053894	0.954233	-0.162891	0.753143	0.20648	0.999983	0.0313292	0.999778	0.126062	0.802521	-0.0366013	0.999992	-0.0419209	0.999994	0.12884	0.999959
Ap3b2	-1.05412	0.784611	-2.34654	0.347337	-0.246097	0.960682	-1.0164	0.822894	-2.56826	0.111202	1.42383	0.662757	0.281012	0.839395	0.214653	0.989467	-0.271688	0.755961	1.02297	0.224381	-0.830515	0.207794	-0.384072	0.739076	-0.0781587	0.999983	0.00698233	0.999778	-0.0144752	0.978143	-0.0348386	0.999992	0.0987535	0.999994	-0.0649921	0.999959
Ap3d1	0.240331	0.514014	0.131724	0.616998	0.334329	0.135312	0.451283	0.0274038	0.194866	0.289542	-0.191787	0.461045	0.573391	0.00459825	0.029345	0.989467	-0.427171	0.0268291	0.178924	0.395414	-0.198421	0.60419	-0.46548	0.0318321	-0.0374195	0.999983	0.0275491	0.999778	0.019573	0.996583	-0.00590324	0.999992	0.084175	0.999994	-0.00925237	0.999959
Ap3m1	-0.179421	0.68249	-0.069606	0.835719	-0.275038	0.24736	-0.0795262	0.851114	-0.454058	0.00633485	-0.350811	0.176139	0.00316931	0.999876	-0.217454	0.700806	0.0174277	0.947531	-0.0453827	0.858765	-0.0391515	0.969261	0.120363	0.828112	0.193222	0.999983	0.068045	0.999778	0.348385	0.172015	-0.0242473	0.999992	0.0575192	0.999994	0.0578117	0.999959
Ap3m2	0.495084	0.0379122	0.00749523	0.98298	-0.0687123	0.861562	0.460456	0.0385619	0.0260293	0.93298	-0.0656564	0.871526	0.125075	0.818723	0.250127	0.7517	0.349151	0.258871	0.108929	0.76542	-0.382397	0.28521	0.399104	0.3055	0.0709428	0.999983	0.0489095	0.999778	0.0992666	0.816952	0.0311254	0.999992	0.148757	0.999994	0.0883236	0.999959
Ap3s1	-0.0469115	0.971741	0.425604	0.262984	-0.534391	0.179027	-0.471946	0.269293	-0.0437236	0.93298	0.0549557	0.930878	-0.742935	0.0516691	-0.122132	0.989467	0.10833	0.8234	-0.860962	0.00706626	-0.105122	0.932328	-0.355307	0.55619	0.183922	0.999983	-0.326842	0.999778	0.610602	0.157852	0.01622	0.999992	-0.396869	0.999994	-0.108192	0.999959
Ap4b1	0.151093	0.811889	0.343746	0.160026	-0.279807	0.356246	0.0697171	0.898668	-0.217473	0.326606	-0.279065	0.367693	0.150142	0.719986	-0.195153	0.845101	-0.0311401	0.923422	0.0761603	0.821372	-0.0342639	0.987073	-0.319881	0.379052	0.121893	0.999983	0.10213	0.999778	-0.493551	0.0865049	-0.0980297	0.999992	-0.14379	0.999994	0.0910412	0.999959
Ap4e1	-0.298966	0.783627	0.247825	0.671169	0.313839	0.614105	0.00027473	0.999802	-0.541844	0.152376	-0.171725	0.813922	0.224438	0.775086	-0.146718	0.989467	0.352975	0.481928	0.23845	0.652721	0.419223	0.622833	-0.00331439	0.997949	0.386985	0.999983	-0.0192148	0.999778	-0.316864	0.688713	-0.107735	0.999992	0.11676	0.999994	0.128681	0.999959
Ap4m1	-0.0531889	0.971741	-0.600029	0.00669509	0.00185769	0.995782	0.339048	0.261407	-0.414124	0.0485362	0.0694397	0.89101	0.122374	0.794422	0.0087825	0.989996	-0.109601	0.751366	-0.191178	0.497591	-0.210739	0.691673	-0.132363	0.870774	-0.0554983	0.999983	0.152588	0.999778	-0.39535	0.23884	-0.019491	0.999992	-0.0141412	0.999994	-0.193003	0.999959
Ap4s1	0.0482341	0.971741	-0.0827242	0.90176	-0.644367	0.117083	-0.387658	0.434505	-0.137275	0.747664	0.0515277	0.936056	-0.705758	0.114333	0.195058	0.962066	-0.234097	0.61795	-0.779101	0.0322881	-0.121689	0.928064	0.123635	0.934737	-0.144766	0.999983	-0.0671225	0.999778	-0.20364	0.799298	-0.119024	0.999992	-0.0853847	0.999994	-0.0903875	0.999959
Ap5b1	0.32933	0.805814	0.551665	0.318608	1.05051	0.060092	1.04757	0.0550016	0.769542	0.0692261	0.375299	0.592898	0.418932	0.55556	-0.0417654	0.989467	-0.967245	0.0438445	0.0593235	0.92198	-0.0348222	0.992151	-0.116063	0.960702	0.195942	0.999983	0.0230623	0.999778	-0.496923	0.546217	-0.0935217	0.999992	0.0358192	0.999994	-0.0426167	0.999959
Ap5m1	-0.0759586	0.924431	0.169121	0.521263	-0.279497	0.273831	-0.158071	0.627264	-0.373435	0.0371444	-0.269139	0.3203	-0.190016	0.556505	-0.281667	0.57251	-0.123973	0.650238	-0.241671	0.30267	-0.067225	0.930937	0.182611	0.69742	0.0982686	0.999983	0.0252114	0.999778	-0.0112091	0.996583	0.118956	0.999992	-0.290051	0.999994	0.16663	0.999959
Ap5s1	-0.0799435	0.902785	0.218112	0.301029	0.28887	0.229619	0.181889	0.516177	0.121793	0.525626	0.329225	0.201721	0.153083	0.607276	0.0285477	0.989467	-0.223546	0.289145	0.482087	0.0105862	0.104823	0.838525	-0.166522	0.669003	0.0699311	0.999983	0.208804	0.999778	-0.227601	0.385893	-0.0166386	0.999992	0.161914	0.999994	0.0491774	0.999959
Ap5z1	0.394357	0.497745	0.340136	0.328338	0.697419	0.0451917	0.748112	0.0214979	0.591714	0.021905	0.113283	0.839895	0.293807	0.519252	0.0199397	0.989467	-0.117602	0.788732	0.344393	0.298099	0.144365	0.883479	-0.307859	0.591981	-0.00197051	0.999983	0.152982	0.999778	-0.106378	0.899574	0.0679714	0.999992	0.080602	0.999994	0.0135649	0.999959
Apaf1	-0.180923	0.851161	0.349799	0.360484	-0.137988	0.81099	0.00200185	0.99726	0.121833	0.754366	-0.16493	0.754949	0.183029	0.749269	-0.129378	0.98836	-0.102694	0.82818	-0.191433	0.61919	-0.00393005	0.996008	-0.672965	0.0884988	0.0494495	0.999983	-0.0418617	0.999778	0.0259717	0.996583	-0.0490499	0.999992	0.0426744	0.999994	0.177839	0.999959
Apba1	0.675199	0.0973616	0.693718	0.0195761	-0.0765935	0.909039	1.12067	7.18217e-05	1.08941	1.47006e-05	-0.2998	0.486371	0.274475	0.698576	0.24679	0.90477	0.752051	0.0586838	2.04759	8.97899e-06	-0.413534	0.529244	-0.173082	0.902955	-0.0219172	0.999983	0.0113901	0.999778	0.0503468	0.974811	-0.119154	0.999992	0.13274	0.999994	0.0604476	0.999959
Apba2	0.0181415	0.989633	1.26109	0.000520373	0.657893	0.202745	-0.741858	0.191686	1.38597	1.14172e-05	0.210378	0.765348	-2.07534	0.0412114	-0.152781	0.989467	1.99878	0.0037618	0.739511	0.297474	-1.46668	0.0698709	1.70943	0.0341876	-0.0742627	0.999983	-0.0462284	0.999778	0.0215763	0.996583	-0.0582832	0.999992	0.0475095	0.999994	0.0679521	0.999959
Apba3	0.781669	0.549491	0.492799	0.566811	1.2881	0.0880077	1.3246	0.0794482	0.714874	0.240424	0.925341	0.28351	0.545656	0.586733	0.0242192	0.989799	-0.25635	0.77569	0.28343	0.732931	-0.0251096	0.992151	-0.255385	0.920284	-0.308638	0.999983	0.0813266	0.999778	-0.725641	0.498225	0.0652356	0.999992	0.00425855	0.999994	-0.138074	0.999959
Apbb1	-0.123209	0.94404	-1.06298	0.00228658	0.550897	0.236847	0.0852174	0.937988	-0.515938	0.139747	0.0871077	0.922923	0.25975	0.740834	0.571931	0.548977	0.271168	0.604935	0.428498	0.365482	-0.722585	0.201941	-0.0385995	0.996107	-0.201878	0.999983	-0.00165549	0.999778	-0.27862	0.698552	-0.0159526	0.999992	0.017832	0.999994	0.0608074	0.999959
Apbb2	-0.467138	0.341283	-0.548261	0.0662602	-0.0699962	0.90949	-0.0767238	0.919747	-0.971909	7.0484e-05	-0.404752	0.297153	0.53593	0.168956	0.077754	0.989467	0.565923	0.0750533	0.296072	0.391415	0.0211045	0.992151	0.0295798	0.996107	0.117652	0.999983	-0.159997	0.999778	0.113478	0.893687	-0.00448905	0.999992	0.0572738	0.999994	-0.069483	0.999959
Apbb3	-0.248472	0.575033	-0.115957	0.720987	0.630057	0.00834975	0.242564	0.423073	-0.118886	0.614802	0.22938	0.43604	0.00119571	0.999876	-0.116527	0.963373	-0.574589	0.0125774	-0.23159	0.360058	-0.348717	0.294585	-0.0711889	0.940059	-0.0474556	0.999983	0.153049	0.999778	-0.240184	0.492653	0.118532	0.999992	0.146335	0.999994	0.04918	0.999959
Apc	-0.495975	0.515264	-0.172024	0.786341	0.201284	0.761497	0.220268	0.771089	-0.689633	0.050951	-0.669965	0.202209	0.551754	0.293226	0.0380093	0.989467	0.684136	0.100559	0.948951	0.0143922	0.095975	0.957355	-0.0173299	0.996107	-0.00191171	0.999983	-0.397618	0.999778	0.418715	0.518301	-0.0593442	0.999992	-0.0706265	0.999994	0.153607	0.999959
Apc2	-0.104544	0.977592	1.11467	0.345311	1.4958	0.397482	1.44261	0.304318	0.302572	0.802311	0.0742166	0.971612	0.50139	0.835364	-0.117404	0.989467	1.17154	0.326554	-0.571058	0.5811	-0.9505	0.471698	-0.429026	0.859452	-0.0468066	0.999983	-0.0161323	0.999778	-0.161899	0.854727	0.0848269	0.999992	0.23459	0.999994	0.0524191	0.999959
Apcdd1	-0.304746	0.750455	-1.01527	0.00386803	-0.0061841	0.991881	-0.0954719	0.92521	-0.998697	0.00199633	0.132312	0.853878	-0.352623	0.59317	0.107714	0.989467	0.440639	0.361632	-0.48462	0.294748	-0.712678	0.223223	0.29318	0.784313	0.0952246	0.999983	0.0986657	0.999778	-0.0163501	0.996583	0.58312	0.999992	-0.0531701	0.999994	0.339407	0.999959
Apcdd1l	-0.356626	NA	-1.52569	NA	-0.246079	NA	-1.08905	NA	0.309307	NA	-0.422816	NA	-0.00839018	NA	0.251146	NA	-0.503724	NA	-0.564054	NA	-0.102786	NA	-0.0533684	NA	-0.0246045	NA	-0.164027	0.999778	0.0587326	NA	-0.0480727	0.999992	-0.174324	NA	-0.289977	0.999959
Apcs	2.31457	NA	-0.563968	NA	1.75177	NA	-0.127328	NA	0.309307	NA	-0.422816	NA	0.953336	NA	3.52675	NA	-2.55022	NA	-2.20465	NA	0.85894	NA	-0.0533684	NA	-0.0246045	NA	-0.164027	0.999778	0.0597268	NA	-0.0480727	0.999992	-0.174324	NA	-0.289977	0.999959
Apeh	0.0813615	0.912199	-0.0329238	0.927351	0.0618465	0.877335	0.162662	0.607002	0.0922728	0.686814	0.2269	0.399873	0.226636	0.416806	0.0900044	0.977609	-0.230879	0.305341	-0.31396	0.122974	-0.0129801	0.992151	-0.161735	0.720479	0.00472437	0.999983	0.166682	0.999778	-0.144349	0.713663	-0.0416715	0.999992	0.0722444	0.999994	0.060687	0.999959
Apela	-0.018201	0.996045	-0.858001	0.574175	-0.959995	0.555439	-0.245574	0.941322	-1.44957	0.172605	-0.874929	0.597894	0.726076	0.706545	2.3841	0.217432	-2.40746	0.0449425	-1.00764	0.425637	1.82397	0.289703	-0.987765	0.692597	1.86186	0.999983	-0.174419	0.999778	1.95859	0.423429	1.32607	0.999992	3.81671	0.999994	0.328772	0.999959
Apex1	0.104827	0.929122	0.314793	0.362387	0.154723	0.748453	-0.18158	0.728783	0.773463	0.00162352	0.485391	0.21099	-0.175936	0.73748	0.222205	0.880541	0.238294	0.496766	0.201515	0.562753	0.121946	0.906076	0.0990785	0.933694	-0.091634	0.999983	0.0257648	0.999778	0.0189119	0.996583	0.00159478	0.999992	0.0644851	0.999994	0.215328	0.999959
Apex2	-0.0966863	0.923259	0.224538	0.487317	0.133479	0.761802	0.0481032	0.956153	0.0591482	0.866558	0.131654	0.759428	0.112359	0.835364	-0.0110646	0.989787	-0.0483917	0.897001	-0.0150829	0.965496	-0.0408205	0.985591	0.24026	0.672018	-0.343686	0.999983	0.0785774	0.999778	-0.207804	0.719834	0.542043	0.999992	-0.21067	0.999994	0.190229	0.999959
Aph1a	-0.0962222	0.900821	-0.424918	0.0597324	0.15363	0.654548	0.18981	0.581482	0.022969	0.942172	0.338466	0.255048	-0.0767278	0.866616	-0.0893832	0.98945	-0.461053	0.0439016	-0.233177	0.333474	0.00723852	0.992802	0.167821	0.75282	-0.151594	0.999983	0.206274	0.999778	-0.642613	0.00971417	-0.0805995	0.999992	0.0202412	0.999994	0.12028	0.999959
Aph1b	0.0929163	0.93484	-0.322561	0.29671	-0.281843	0.432334	-0.00395068	0.993939	-0.919949	3.46157e-05	-0.0854632	0.875064	0.319922	0.473965	0.0922397	0.989467	0.497141	0.116994	-0.0758886	0.855859	-0.692161	0.0397077	-0.0193347	0.996107	0.0130507	0.999983	0.0149544	0.999778	-0.193514	0.71072	-0.0132076	0.999992	-0.130608	0.999994	0.21792	0.999959
Api5	-0.224684	0.499518	0.174199	0.415915	-0.297412	0.150143	-0.324851	0.110825	-0.268715	0.0896109	-0.0650638	0.841761	-0.364369	0.0816346	-0.171678	0.78021	0.196961	0.319516	-0.196878	0.304151	0.0880079	0.875627	0.0933293	0.873396	0.0314557	0.999983	-0.0957487	0.999778	0.00609653	0.996583	-0.0229374	0.999992	-0.153224	0.999994	-0.00985502	0.999959
Apln	0.0531695	0.973282	-0.130451	0.897573	-0.454584	0.502218	-0.713515	0.246862	0.221178	0.695496	-0.645346	0.320043	-0.821309	0.282172	-0.285309	0.957894	0.320465	0.636873	-0.709735	0.261698	-0.269929	0.873071	0.238548	0.91134	-0.0260584	0.999983	-0.184359	0.999778	0.247417	0.833519	-0.169137	0.999992	-0.128084	0.999994	0.072414	0.999959
Aplnr	-0.240872	0.806596	-1.27803	4.66992e-05	-0.647556	0.121767	-0.625663	0.141554	-1.0957	0.000276486	-0.428878	0.370948	0.670478	0.184527	0.287374	0.87888	-0.127751	0.816289	-0.344052	0.434186	-0.746501	0.139341	-0.739281	0.131424	-0.100286	0.999983	0.309496	0.999778	-0.445545	0.526884	-0.0427269	0.999992	-0.218841	0.999994	-0.457437	0.999959
Aplp1	1.10703	0.432152	-0.386132	0.670758	0.162787	0.911479	1.04052	0.254313	0.00471053	0.995133	0.866209	0.363826	0.0420342	0.999876	0.49505	0.855296	-0.877775	0.21191	-0.710697	0.27398	-0.628671	0.574255	-0.823642	0.387781	-0.117841	0.999983	-0.107475	0.999778	-0.0719958	0.989254	-0.0106989	0.999992	0.116152	0.999994	0.0424345	0.999959
Aplp2	0.214142	0.49665	-0.272183	0.117574	-0.290058	0.135109	0.0106649	0.99019	-0.632186	3.19474e-06	-0.301202	0.17523	0.407207	0.0315981	0.11416	0.907913	-0.446495	0.00668739	-0.229566	0.185632	0.255561	0.317684	-0.047232	0.95079	0.0766335	0.999983	-0.0419896	0.999778	-0.00302359	0.996583	-0.0182387	0.999992	-0.0502296	0.999994	-0.0158438	0.999959
Apoa1	0.28607	0.941229	-1.00508	0.294559	1.39623	0.185896	0.339861	0.856432	0.11371	0.932519	0.950259	0.427123	-0.268466	0.850352	-0.089413	0.989467	-1.27486	0.0886652	-0.908036	0.22715	-0.703716	0.647963	-0.593697	0.71024	-0.131933	0.999983	-0.454193	0.999778	-0.185252	0.962762	1.0182	0.999992	0.438561	0.999994	0.121613	0.999959
Apoa2	1.37829	0.535015	0.0468955	0.979421	0.842979	0.608404	-0.202264	0.9567	0.303502	0.818013	-0.96657	0.521459	-0.432328	0.811583	0.116129	0.989467	-1.0068	0.350752	-0.761554	NA	-0.647488	0.778904	-0.578441	0.839839	-0.671534	0.999983	-0.533081	0.999778	-0.811853	0.752216	-0.805759	0.999992	-0.408295	0.999994	-2.12284	0.999959
Apoa4	2.4078	0.661274	2.18322	0.348665	-0.0975508	0.979794	-0.0302435	0.99448	2.14558	0.223539	-0.841518	0.81095	0.368771	0.935837	0.468858	0.989467	-1.82223	0.355322	-1.57378	0.411376	-1.02753	0.837371	-3.56563	0.0977908	-0.0246063	0.999983	-0.164044	0.999778	0.0590861	0.996583	-0.0480761	0.999992	-0.174343	0.999994	-0.289998	0.999959
Apoa5	-0.356651	0.971741	-0.564008	0.902668	-0.246097	NA	-1.08913	0.837878	1.27112	0.646607	-0.422847	0.930878	-0.00839079	NA	1.13705	0.968441	-2.37748	NA	-1.52589	NA	-0.102793	NA	-0.0533722	NA	0.0653127	0.999983	1.08383	0.999778	0.877175	0.641532	-0.247143	0.999992	0.409735	0.999994	-1.13675	0.999959
Apob	1.52144	0.809854	0.0498477	0.988469	1.6227	0.643378	0.834458	0.885007	0.309329	0.93298	2.7169	0.317904	0.858377	0.505594	-0.270052	0.989467	-0.665984	0.530525	0.312378	0.789314	-0.342364	0.916757	-0.977488	0.527714	2.41055	0.999983	0.828486	0.999778	-0.90294	0.895387	0.913719	0.999992	-0.144995	0.999994	-0.289998	0.999959
Apobec1	4.74847	1.45566e-17	4.73931	1.57777e-17	-0.288941	0.819091	4.129	3.22812e-13	5.5673	6.55048e-25	0.636715	0.518224	0.669684	0.508421	0.68417	0.772046	-1.91191	0.00463936	-0.133456	0.883785	0.321193	0.891004	0.0904413	0.996107	4.39134	0.141963	4.08632	0.999778	-3.59271	0.139236	2.40562	0.999992	1.64067	0.999994	-0.289998	0.999959
Apobec2	1.22174	0.679659	-0.287397	0.904194	0.264297	0.92833	0.367545	0.909542	0.496925	0.750453	0.53039	0.821342	0.0297833	0.999876	-0.575165	0.982617	1.07504	0.506771	-0.289266	0.867707	-1.07372	0.721874	0.218721	0.987778	1.45579	0.999983	-0.164044	0.999778	-7.30225	0.000380843	2.6703	0.999992	1.45552	0.999994	3.64773	0.999959
Apobec4	-0.503003	0.761946	-0.616702	0.441546	-0.258109	0.821248	-0.717151	0.426286	-1.39987	0.0144699	-0.263126	0.818528	-0.00839079	0.999876	0.251164	0.989467	-1.46556	0.62019	-0.564095	NA	-0.102793	0.992151	0.908423	0.920811	-0.0152868	0.999983	0.841471	0.999778	1.6648	0.333369	-0.0367597	0.999992	1.41845	0.999994	-0.289998	0.999959
Apobr	0.994042	0.205353	1.0831	0.0345793	-0.0265233	0.978118	1.06443	0.0713576	0.958358	0.0375459	-0.17254	0.866007	-0.11149	0.939285	-0.710624	0.581207	0.413681	0.521657	1.00635	0.0617002	0.492696	0.671178	2.02269	8.41424e-05	-0.073125	0.999983	-0.0529211	0.999778	0.209028	0.892168	-0.0295029	0.999992	0.523556	0.999994	-0.240429	0.999959
Apoc1	-0.22245	0.945209	0.352046	0.732978	-0.311055	0.791222	-0.461364	0.694963	-0.163305	0.862629	-0.717957	0.436017	-1.00556	0.396077	-0.776432	0.8572	0.223216	0.877773	-0.649202	0.554156	-0.160303	0.979072	0.517901	0.850328	-0.0270999	0.999983	0.23323	0.999778	-0.455799	0.748407	-0.272223	0.999992	0.196739	0.999994	0.18956	0.999959
Apoc2	-0.926952	0.886289	-1.2616	0.485196	0.445932	0.89738	-0.499176	0.907454	-1.85421	0.277834	-2.46769	0.297276	-0.318213	0.855877	0.247484	0.989467	-1.54745	0.0883728	-1.51559	0.0819625	-0.823312	0.664351	-1.08998	0.447221	0.150025	0.999983	-1.47563	0.999778	-2.18325	0.433953	0.862334	0.999992	-0.43975	0.999994	1.44142	0.999959
Apoc3	0.605143	0.971741	-0.564007	0.92974	-0.246097	0.970826	-1.08913	0.896777	0.309328	0.949578	-0.422846	0.946069	-0.959461	0.859869	-0.887126	0.989467	0.285947	0.937437	-1.83797	0.557796	-1.21135	0.89378	-2.70306	0.596749	-0.0246063	0.999983	1.27737	0.999778	0.0588942	0.996583	-0.0480761	0.999992	-0.174342	0.999994	-0.289997	0.999959
Apoc4	0.8677	0.87242	-2.32086	0.177157	-0.540996	0.842932	0.0625903	0.99019	-2.22584	0.125129	0.660306	0.794028	-0.540427	0.845611	-0.719403	0.965739	0.460474	0.828116	-4.52472	0.000775622	-2.12205	0.338104	-0.646916	0.907369	-0.169645	0.999983	0.19884	0.999778	-0.620953	0.873392	-0.559129	0.999992	0.115333	0.999994	-0.939094	0.999959
Apod	-0.208627	0.892943	-2.04796	1.62325e-07	-0.791885	0.126232	-1.6392	0.000124039	-2.60171	6.17742e-12	-0.0871594	0.930745	-0.580376	0.592179	-0.122345	0.989467	1.39362	0.0281928	1.22531	0.115394	-0.714874	0.44436	-0.168781	0.949126	0.100925	0.999983	0.139323	0.999778	0.672374	0.251364	0.0568903	0.999992	-0.610018	0.999994	0.0640924	0.999959
Apoe	0.0386357	0.985961	2.0749	0.00279387	0.893947	0.357576	0.132148	0.960854	0.674635	0.367308	1.03163	0.299632	0.154786	0.938596	-0.309265	0.986119	-0.0187737	0.98588	0.135488	0.893429	0.0796949	0.992151	0.335862	0.910749	-0.278008	0.999983	-0.115963	0.999778	0.0164135	0.996583	-0.00264031	0.999992	0.0362676	0.999994	0.0427076	0.999959
Apof	-1.29028	NA	2.27969	NA	-1.20781	NA	-0.127328	NA	0.565251	NA	-0.422816	NA	-0.00839018	NA	0.251146	NA	-1.46545	NA	-0.564054	NA	-0.102786	NA	1.58939	NA	-0.0246045	NA	-0.164027	0.999778	-0.90227	NA	-0.0480727	0.999992	-0.174324	NA	-0.289977	0.999959
Apoh	-0.0869165	0.971741	-1.05421	0.0363609	0.170662	0.861397	0.303513	0.751485	-2.36092	2.58717e-08	0.444051	0.537339	-0.583312	0.707663	-1.41131	0.383111	-1.49001	0.13403	-1.04834	0.189553	-0.662387	0.689187	-0.262101	0.943245	0.245731	0.999983	-0.164678	0.999778	-3.152	0.182573	-0.731157	0.999992	1.15657	0.999994	-1.28915	0.999959
Apold1	0.50602	0.744789	-0.761689	0.282187	-1.15688	0.107484	-1.00784	0.178989	-1.37103	0.01058	-0.821288	0.317904	0.362716	0.747325	-0.149503	0.989467	0.273685	0.750017	-1.07934	0.0872137	-0.216793	0.92492	0.257197	0.918283	1.24474	0.784148	0.825905	0.999778	0.667061	0.521894	0.935169	0.999992	1.09949	0.999994	0.412777	0.999959
Apom	0.817145	0.765293	-0.271161	0.901001	1.09702	0.429697	0.235054	0.937317	0.0881543	0.95042	0.757117	0.625729	0.0236046	0.999876	0.296646	0.989467	-0.613355	0.622503	-1.46813	0.143741	-0.223452	0.962404	-2.55361	0.0225186	0.54563	0.999983	0.857726	0.999778	-0.633192	0.817971	0.0939182	0.999992	-0.223453	0.999994	0.119257	0.999959
Apoo	0.0786661	0.966675	0.125615	0.808182	-0.519441	0.161415	-0.604906	0.0935703	-0.120176	0.750909	-0.164581	0.747933	-0.489661	0.216556	0.150027	0.968633	-0.395486	0.244164	-0.609489	0.0473759	-0.125646	0.910475	-0.398071	0.429727	0.0100408	0.999983	-0.101784	0.999778	-0.188935	0.77887	-0.172699	0.999992	-0.19553	0.999994	-0.27303	0.999959
Apool	0.297973	0.637323	0.218495	0.579733	-0.537007	0.114446	-0.410245	0.270395	0.155511	0.630207	0.0737773	0.914102	-0.318462	0.439211	0.143824	0.96582	-0.686688	0.0184566	-0.842796	0.00258245	-0.283749	0.645898	-0.364614	0.448971	-0.0610231	0.999983	0.179597	0.999778	0.205564	0.752774	0.155096	0.999992	-0.00224293	0.999994	-0.0949021	0.999959
Appbp2	-0.340202	0.407572	0.0819734	0.840192	-0.255746	0.405447	-0.265066	0.404444	-0.383967	0.0643643	-0.391725	0.203888	-0.0489946	0.937302	-0.274632	0.66536	0.0732683	0.831491	-0.205004	0.432059	0.111334	0.884419	0.0545586	0.965553	0.186418	0.999983	-0.16682	0.999778	0.154563	0.740861	-0.0649506	0.999992	-0.128195	0.999994	0.0284382	0.999959
Appl1	-0.274175	0.599945	-0.349249	0.207743	-0.178472	0.640542	-0.281186	0.420735	-0.751664	0.000376007	-0.499836	0.138062	-0.045829	0.955898	-0.279165	0.722014	0.450237	0.0941445	-0.091691	0.793096	0.00239539	0.997188	-0.126608	0.892528	0.119872	0.999983	-0.28753	0.999778	0.308974	0.426573	-0.0277574	0.999992	-0.0590604	0.999994	0.0465074	0.999959
Appl2	-0.129064	0.862292	-0.693221	0.00180381	-0.225612	0.503203	-0.230906	0.518363	-1.14132	4.94298e-09	-0.139522	0.715363	0.0571971	0.92465	-0.0931742	0.989467	-0.559352	0.024033	-0.727416	0.00185171	-0.332566	0.411266	-0.0294715	0.996107	-0.0398235	0.999983	-0.0414911	0.999778	0.145789	0.781251	0.0162881	0.999992	-0.0375141	0.999994	-0.00466902	0.999959
Aprt	0.562645	0.572894	0.507335	0.394019	0.129084	0.897723	0.286511	0.754423	1.19252	0.00475691	0.679843	0.295234	-0.459281	0.525729	0.132855	0.989467	-0.707533	0.176615	-1.21252	0.00999155	-0.491405	0.63201	-0.408025	0.706668	-0.0733892	0.999983	-0.00204698	0.999778	-0.700976	0.32915	0.0620257	0.999992	-0.0960503	0.999994	-0.221464	0.999959
Aptx	-0.112203	0.870793	-0.0215413	0.953673	-0.139899	0.693315	-0.0284499	0.981062	-0.0423063	0.895203	-0.465856	0.110259	-0.025053	0.994048	-0.0559935	0.989467	0.090626	0.80962	-0.0730198	0.854661	0.0733974	0.936321	0.0532167	0.97315	0.135859	0.999983	0.0737127	0.999778	-0.120314	0.814886	0.00717627	0.999992	-0.110478	0.999994	0.117916	0.999959
Aqp1	-0.53898	0.746734	-1.23733	0.0664459	-0.0857038	0.960682	0.208818	0.894722	-1.3806	0.0174161	0.478933	0.627088	-0.953	0.268463	-1.80091	0.0353632	0.934796	0.187935	0.589483	0.417785	-0.865855	0.451507	1.32854	0.108802	0.248717	0.999983	-0.207398	0.999778	-0.619078	0.604494	0.618741	0.999992	-0.673269	0.999994	-0.330171	0.999959
Aqp10	-0.00939609	0.998095	0.974485	0.493244	0.0195615	NA	-3.49724	0.0866325	1.29081	0.205335	-0.39485	0.859537	-1.64699	NA	-0.933291	0.876844	0.967032	NA	-0.95638	NA	-0.157831	NA	3.1775	NA	-1.88631	0.999983	-1.13248	0.999778	-3.59062	0.174464	-0.586895	0.999992	-3.2264	0.999994	2.19841	0.999959
Aqp11	0.0284422	0.983667	-0.946712	0.0540606	-0.121796	0.902386	-0.576565	0.375067	-1.81259	2.3187e-05	-0.389039	0.569589	0.276569	0.70645	-0.0244843	0.989467	-0.485778	0.315978	-0.390742	0.413203	-0.135187	0.934001	-0.775159	0.175361	0.080172	0.999983	-0.0498538	0.999778	-0.327898	0.705593	-0.0332088	0.999992	0.183864	0.999994	-0.030404	0.999959
Aqp2	1.16848	NA	1.91952	NA	-1.20785	NA	-2.0555	NA	2.1761	NA	2.51572	NA	-2.21179	NA	0.251154	NA	-0.503741	NA	-0.564074	NA	-0.102789	NA	-0.0533702	NA	-0.986364	NA	1.27672	0.999778	0.635257	NA	2.77883	0.999992	-1.53482	NA	-2.72638	0.999959
Aqp3	0.727712	0.888174	-0.464209	0.880836	-0.383241	0.907198	-0.114023	0.99019	-0.811914	0.646638	-0.21255	0.940055	-1.04851	0.689746	-2.17919	0.565061	1.58569	0.375571	-0.775401	0.690934	-1.47468	0.665281	-1.43972	0.656782	-1.62972	0.999983	1.44075	0.999778	-1.50821	0.702867	-1.66796	0.999992	0.586941	0.999994	1.05733	0.999959
Aqp4	-0.290542	0.75027	0.416124	0.32184	0.0669526	0.937717	-0.0777252	0.941593	-0.0188151	0.965967	0.310947	0.542428	-0.968883	0.684114	1.74288	0.443594	0.311816	0.879723	1.46588	0.403706	-0.113752	0.992151	1.64438	0.362945	0.20739	0.999983	-0.242231	0.999778	0.118407	0.907689	0.0332701	0.999992	-0.300419	0.999994	0.0315402	0.999959
Aqp5	0.261626	0.973282	-0.20441	0.960763	1.19372	0.76991	0.690502	0.908706	0.259032	0.940428	0.957825	0.827074	-2.52034	0.464976	2.86252	0.798246	-18.4592	2.6132e-14	-0.720117	0.82939	4.63288	0.294585	7.13085	0.029641	1.03915	0.999983	-0.994262	0.999778	-0.299665	0.996583	1.76997	0.999992	-0.364584	0.999994	-0.898968	0.999959
Aqp6	-0.356648	NA	-0.564003	NA	-0.246095	NA	-0.127336	NA	0.309326	NA	0.538943	NA	-2.2252	NA	-1.74164	NA	0.458031	NA	-0.564089	NA	-0.102792	NA	2.25062	NA	1.77092	NA	1.87501	0.999778	-4.50981	NA	-0.801587	0.999992	-4.90958	NA	-0.827902	0.999959
Aqp7	0.524873	0.885482	0.318607	0.90176	-0.263495	0.959764	-1.25485	0.442409	0.816493	0.492762	-1.63631	0.294269	0.770706	0.580966	-0.547665	0.939289	-1.00035	0.326553	-1.16732	0.217285	-0.643579	0.779024	-0.782447	0.689177	0.227409	0.999983	1.29365	0.999778	0.4022	0.892166	-0.805084	0.999992	0.545503	0.999994	1.23928	0.999959
Aqp8	1.48246	0.816799	-0.27903	0.944617	-0.826488	0.844287	-1.86927	0.608855	-0.976621	0.72471	2.06525	0.528985	0.620158	0.89666	-0.345077	0.989467	2.5958	0.281611	-0.535307	0.855774	-2.17656	0.63283	-4.28659	0.119118	0.00638856	0.999983	-0.64855	0.999778	-0.727459	0.911184	-0.17791	0.999992	-0.0299277	0.999994	0.861052	0.999959
Aqp9	0.501784	0.812118	0.493508	0.649148	-0.802763	0.440184	0.711162	0.52967	0.0366973	0.968509	0.41993	0.746221	0.264838	0.916684	0.624474	0.906778	1.0783	0.38806	0.681817	0.602667	0.0838341	0.992151	1.85948	0.22387	0.0922248	0.999983	0.0551876	0.999778	-0.673485	0.631806	0.0893508	0.999992	-0.230057	0.999994	-0.336659	0.999959
Aqr	-0.0881167	0.923341	0.127108	0.716042	-0.0750795	0.872272	0.0142787	0.99019	-0.221764	0.333833	-0.453022	0.149869	0.345279	0.274002	-0.146994	0.931098	0.461621	0.0606278	0.758897	0.00105441	0.133457	0.84717	-0.148829	0.824464	0.129137	0.999983	-0.158783	0.999778	0.473592	0.107386	-0.0946243	0.999992	0.0544463	0.999994	0.0364022	0.999959
Ar	-0.145999	0.964008	-0.233586	0.800137	-0.568647	0.462695	-0.966537	0.149712	-1.13126	0.023396	-0.970333	0.199512	1.79788	0.150818	-0.30605	0.984793	1.5619	0.059661	-0.166199	0.895608	-0.354021	0.872775	0.374383	0.891357	0.472327	0.999983	0.122815	0.999778	0.673318	0.444521	-0.143808	0.999992	0.432298	0.999994	0.404569	0.999959
Araf	0.197863	0.596973	-0.0870619	0.75386	0.136497	0.611487	0.241112	0.305524	0.190289	0.269327	-0.0331381	0.930745	0.102703	0.759401	0.069403	0.989467	-0.369171	0.051632	0.128448	0.552553	0.0918851	0.873408	-0.146379	0.724442	-0.100643	0.999983	-0.0054688	0.999778	-0.547571	0.00946399	0.0129205	0.999992	0.0506009	0.999994	0.157757	0.999959
Arap1	0.249977	0.684035	0.000611489	0.998608	0.297766	0.402779	0.324847	0.374102	0.355146	0.155632	0.13726	0.7565	0.216746	0.612175	0.000716067	0.999447	-0.0681084	0.874675	0.03733	0.915659	-0.223219	0.720882	-0.0957274	0.928305	0.0280406	0.999983	0.0837416	0.999778	-0.338081	0.434449	0.0307702	0.999992	0.0185897	0.999994	-0.104133	0.999959
Arap2	-0.147852	0.92049	0.193335	0.74485	-0.0494837	0.960682	-0.121003	0.895207	-0.325907	0.401943	-0.781558	0.130203	-0.00485869	0.999876	-0.136547	0.989467	0.225968	0.651087	0.00204888	0.996724	0.127461	0.929835	0.073628	0.981661	0.204602	0.999983	-0.159951	0.999778	0.42236	0.50171	-0.00472258	0.999992	0.0299529	0.999994	0.0819639	0.999959
Arap3	-0.13266	0.894816	-0.536625	0.0776388	0.144084	0.774738	0.324408	0.435114	-0.427579	0.115868	0.048735	0.930878	0.0651757	0.949099	0.152366	0.970608	0.410064	0.26104	0.214891	0.615595	-0.472212	0.348751	-0.0326591	0.996107	0.379114	0.999983	0.225325	0.999778	-0.226752	0.727038	0.0865311	0.999992	0.531447	0.999994	0.353827	0.999959
Arc	0.647772	0.820065	-0.257431	0.90176	1.88818	0.120598	0.836218	0.601011	-2.15837	0.0149628	1.51586	0.267189	-1.53208	0.607634	0.201747	0.989467	-0.547254	0.846052	-0.16847	0.943418	-2.35406	0.211592	0.533233	0.936581	-0.648394	0.999983	0.591393	0.999778	1.00908	0.558035	1.07913	0.999992	0.979121	0.999994	1.32334	0.999959
Arcn1	-0.145682	0.750504	0.154189	0.509088	-0.250502	0.264372	-0.0755449	0.84869	-0.120874	0.527247	-0.198605	0.417431	-0.0259519	0.971356	-0.213121	0.669226	-0.181152	0.37895	-0.2216	0.243781	-0.0462747	0.952376	-0.188712	0.573157	0.0433782	0.999983	-0.0344206	0.999778	0.232614	0.397465	-0.0241579	0.999992	-0.0313638	0.999994	-0.00440663	0.999959
Areg	-0.471477	0.913033	5.1101	1.88016e-07	0.0417769	0.985239	0.0579604	0.99019	4.22517	3.75468e-06	0.200402	0.931291	-0.414139	0.847354	-0.285857	0.989467	-1.3368	0.27	-1.44128	0.205766	-1.35459	0.495541	0.931514	0.697184	3.15504	0.999983	-0.164179	0.999778	0.125079	0.996583	0.686591	0.999992	1.73494	0.999994	1.36811	0.999959
Arel1	-0.198283	0.763667	0.104002	0.805459	0.294703	0.388564	0.228685	0.555967	-0.11583	0.696225	-0.319372	0.352902	0.625935	0.0346938	-0.177429	0.906964	-0.0291867	0.934837	0.375024	0.166583	0.117957	0.891529	0.0130486	0.996107	0.1037	0.999983	-0.109582	0.999778	0.0748661	0.924751	-0.0128442	0.999992	0.326057	0.999994	0.0658696	0.999959
Arf1	-0.0601401	0.931251	0.115667	0.621337	0.0212891	0.960682	0.097789	0.755662	0.133876	0.433942	0.0738751	0.800793	-0.150524	0.551752	-0.0930005	0.954639	-0.313182	0.0710556	-0.19201	0.280768	-0.0140636	0.992151	-0.0894109	0.871816	-0.0483279	0.999983	-0.0226796	0.999778	0.0783816	0.855411	0.00706752	0.999992	0.060999	0.999994	0.0520653	0.999959
Arf3	0.158978	0.744888	0.306188	0.136594	-0.0174693	0.962873	0.221878	0.406519	0.441161	0.00859537	-0.109731	0.722157	0.122633	0.723721	-0.160657	0.861323	0.131255	0.596819	0.299746	0.141178	0.0440189	0.963313	0.369821	0.146463	0.00888717	0.999983	-0.172814	0.999778	0.206702	0.512811	-0.0914693	0.999992	0.151937	0.999994	0.0605054	0.999959
Arf4	-0.141312	0.818777	0.261324	0.309605	-0.327532	0.225141	-0.339182	0.217492	-0.0495856	0.873988	0.161628	0.622994	-0.449088	0.0849688	-0.278745	0.622547	-0.148304	0.591204	-0.665654	0.00150905	-0.165092	0.758705	-0.0535784	0.96211	0.0567156	0.999983	-0.222671	0.999778	0.63829	0.00851577	0.030277	0.999992	-0.093541	0.999994	0.0297702	0.999959
Arf5	0.208498	0.863904	-0.0421292	0.95036	0.13984	0.850729	-0.0414003	0.99019	0.622784	0.0810286	0.513898	0.326387	-0.52313	0.313979	0.0423587	0.989467	-0.76607	0.0572985	-0.960742	0.0110235	-0.345365	0.691986	-0.217975	0.86219	-0.193214	0.999983	-0.0211779	0.999778	-0.222973	0.800493	-0.0669882	0.999992	0.0141798	0.999994	0.0385715	0.999959
Arf6	-0.0292328	0.971741	0.465557	0.00867499	-0.380056	0.0802532	-0.214871	0.404884	0.0183032	0.944499	0.0326182	0.930745	-0.520375	0.0103618	-0.100086	0.962066	-0.189444	0.374333	-0.764802	8.59918e-06	0.0614457	0.92998	0.254164	0.385645	0.05378	0.999983	-0.158691	0.999778	0.428169	0.0611967	-0.0409229	0.999992	-0.127905	0.999994	0.167486	0.999959
Arfgap1	0.168178	0.792655	0.161208	0.624262	0.476494	0.0845039	0.310002	0.322726	0.448576	0.0308268	0.394166	0.213455	0.120699	0.785641	0.0729986	0.989467	-0.512769	0.0334603	-0.11501	0.697281	-0.133628	0.846508	-0.241157	0.590958	-0.0971569	0.999983	-0.00880485	0.999778	-0.341119	0.312693	-0.062012	0.999992	0.082794	0.999994	-0.0560382	0.999959
Arfgap2	0.214351	0.557476	-0.169778	0.45604	-0.0866341	0.781357	0.0816054	0.834652	0.13216	0.484986	0.140824	0.598641	-0.0204151	0.986468	-0.0610045	0.989467	-0.314162	0.107008	-0.105902	0.633641	-0.0395282	0.965602	0.0936917	0.884618	-0.0764135	0.999983	0.0982674	0.999778	-0.355456	0.12887	-0.0578756	0.999992	-0.0516988	0.999994	0.0571818	0.999959
Arfgap3	-0.281403	0.777928	0.173687	0.77251	0.191031	0.7643	0.0211671	0.99019	0.0194532	0.966079	0.15715	0.816332	0.388285	0.47224	0.0552123	0.989467	-0.451335	0.278444	-0.336428	0.417505	-0.398752	0.599198	-0.294175	0.733439	0.0798317	0.999983	-0.0635621	0.999778	0.0519387	0.989044	0.0237003	0.999992	-0.0738113	0.999994	0.100558	0.999959
Arfgef1	-0.314813	0.619476	0.0140297	0.979187	-0.0416993	0.960682	0.132106	0.836311	-0.536492	0.0436947	-0.419985	0.28707	0.149768	0.789415	-0.0901375	0.989467	0.194148	0.604859	0.222543	0.516558	0.0978796	0.929845	-0.01205	0.996107	0.0839899	0.999983	-0.156216	0.999778	0.157139	0.822725	-0.0974855	0.999992	-0.0305209	0.999994	0.0900723	0.999959
Arfgef2	-0.33704	0.563246	-0.044984	0.931994	0.115379	0.827286	0.0540906	0.956114	-0.402461	0.131267	-0.497826	0.199512	0.469269	0.201685	-0.0621848	0.989467	0.111122	0.78693	0.594078	0.0382713	0.188322	0.805386	-0.271554	0.642594	0.0897465	0.999983	0.0137229	0.999778	0.0728066	0.942867	-0.0899235	0.999992	0.120065	0.999994	0.000337326	0.999959
Arfgef3	-0.667114	0.625499	-0.429977	0.630699	0.247746	0.832651	-0.289827	0.831053	-1.61573	0.00312857	-1.46168	0.0765426	-0.655759	0.498834	-0.411655	0.928117	0.597018	0.443526	0.377478	0.638048	0.37713	0.842696	0.415705	0.818933	0.182479	0.999983	-0.156746	0.999778	0.0958527	0.983339	-0.0947736	0.999992	0.0411224	0.999994	0.0495668	0.999959
Arfip1	-0.132305	0.809782	-0.129135	0.649148	-0.399099	0.0862829	-0.2607	0.322339	-0.880229	5.41757e-08	0.0286354	0.937239	-0.52912	0.0187645	-0.160176	0.866268	0.219653	0.334753	-0.221547	0.313382	0.248503	0.492584	0.243274	0.47595	0.255748	0.999983	-0.210302	0.999778	0.0936536	0.865864	0.109583	0.999992	-0.374014	0.999994	-0.0493821	0.999959
Arfip2	0.147722	0.818467	-0.257743	0.341487	0.22981	0.46429	-0.0112343	0.99019	0.261401	0.227302	0.306406	0.319081	-0.251135	0.436834	0.217413	0.79975	-0.349153	0.156927	-0.092662	0.757174	0.0791454	0.926016	0.0143815	0.996107	-0.104461	0.999983	0.0426349	0.999778	-0.132301	0.793741	0.0326784	0.999992	0.0480264	0.999994	0.0262332	0.999959
Arfrp1	-0.0250913	0.976641	-0.255138	0.442401	-0.446111	0.158759	-0.293373	0.433368	0.00745421	0.981692	0.305324	0.396257	-0.341364	0.346323	0.0503068	0.989467	-0.277688	0.364776	-0.493103	0.065916	-0.0632178	0.960082	0.12164	0.909663	-0.03702	0.999983	0.00696297	0.999778	-0.466997	0.190385	-0.0773028	0.999992	0.0104864	0.999994	0.0153169	0.999959
Arg1	2.3953	0.00390234	1.99437	0.0094447	-0.480481	0.713335	3.00916	3.98323e-05	2.79012	3.24215e-05	0.321529	0.827034	-0.320408	0.862839	-1.10524	0.631404	0.617863	0.596205	0.7076	0.513667	0.635809	0.779211	2.06045	0.140847	2.70899	0.383994	1.54137	0.999778	0.997046	0.635116	4.74784	0.00202419	2.48362	0.999994	-0.792303	0.999959
Arg2	0.253291	0.94646	1.87722	0.0319174	0.262298	0.876308	0.387821	0.823121	0.571324	0.489466	0.514137	0.701905	0.217258	0.8907	0.842402	0.686425	-0.49822	0.58397	-0.416859	0.63385	0.0323448	0.992151	-1.22917	0.218377	0.105306	0.999983	0.290982	0.999778	-0.429826	0.799761	-0.0732466	0.999992	0.194754	0.999994	0.23343	0.999959
Arglu1	0.121267	0.849711	-0.174962	0.534123	-0.354872	0.161712	-0.565553	0.0101973	-0.539433	0.00325956	-0.149841	0.641776	-0.398631	0.147413	0.0250845	0.989467	-0.103075	0.727361	-0.0682359	0.826319	-0.0891899	0.908132	-0.128916	0.845381	-0.0188888	0.999983	-0.0602069	0.999778	0.636848	0.00614365	0.0686426	0.999992	-0.10168	0.999994	-0.0068678	0.999959
Arhgap1	0.0103	0.984371	-0.368336	0.0429792	-0.104572	0.724902	0.0382944	0.944887	-0.444774	0.00462039	-0.215879	0.377402	0.240192	0.346323	-0.107197	0.946081	-0.103	0.670131	0.428947	0.0199943	0.056441	0.936409	-0.0803423	0.911995	0.0429657	0.999983	-0.0790624	0.999778	-0.137678	0.702867	-0.0102056	0.999992	0.133648	0.999994	0.0884911	0.999959
Arhgap10	0.0845623	0.928115	-0.106847	0.766807	0.271557	0.371559	0.14472	0.733425	0.265442	0.218457	0.00424833	0.990631	0.280988	0.389332	0.162332	0.901833	0.0150974	0.964335	0.0446513	0.89067	-0.474512	0.109379	-0.471584	0.11425	-0.177703	0.999983	-0.0512924	0.999778	-0.458009	0.199965	0.0158625	0.999992	-0.00760218	0.999994	-0.439633	0.999959
Arhgap11a	-0.466575	0.434812	-0.103656	0.865586	-0.0350753	0.960682	0.0497223	0.97096	-0.246912	0.465481	-0.364538	0.413221	0.383783	0.396053	-0.315165	0.791022	0.466368	0.18804	0.356905	0.313857	-0.176283	0.858582	-0.320938	0.615188	-0.130067	0.999983	-0.270165	0.999778	0.290462	0.632146	-0.093147	0.999992	-0.0669193	0.999994	0.174051	0.999959
Arhgap12	-0.320221	0.604544	-0.0241768	0.962344	-0.123683	0.816586	-0.219807	0.651878	-0.680626	0.00807039	-0.335445	0.3999	0.0840158	0.899078	-0.115398	0.989467	-0.0568747	0.889576	-0.25392	0.442941	0.00595115	0.994821	0.216521	0.766063	0.0619288	0.999983	0.0566383	0.999778	0.185997	0.765248	0.000309816	0.999992	-0.0165684	0.999994	0.0074452	0.999959
Arhgap15	0.263125	0.847999	0.959738	0.033177	-0.596162	0.303031	-0.207642	0.830992	0.393015	0.388792	-0.171408	0.841129	-0.877731	0.141564	-0.277906	0.944293	0.684192	0.174078	0.133057	0.854858	0.161081	0.927006	1.17737	0.0335566	0.587924	0.999983	-0.693251	0.999778	-0.305141	0.788488	-0.220062	0.999992	0.319159	0.999994	-0.479215	0.999959
Arhgap17	0.155313	0.786997	0.498402	0.0150431	0.000459898	0.999173	0.191842	0.553683	0.461577	0.0130074	-0.224845	0.440627	0.523377	0.0346938	-0.13129	0.935129	0.181101	0.481534	0.24279	0.300802	-0.231877	0.584378	-0.196421	0.664168	0.163275	0.999983	-0.211525	0.999778	-0.0961091	0.878973	-0.0899964	0.999992	-0.0601116	0.999994	0.33648	0.999959
Arhgap18	-0.253416	0.765293	0.0705938	0.906182	0.0138365	0.981313	-0.13515	0.853071	-0.27127	0.416343	-0.241876	0.62032	0.123353	0.846479	0.188448	0.94586	-0.591985	0.0803796	-0.194026	0.618367	-0.0118338	0.992151	-0.242885	0.755816	0.190529	0.999983	-0.149482	0.999778	0.375953	0.482569	0.017032	0.999992	0.122166	0.999994	0.0401379	0.999959
Arhgap19	-0.0636618	0.971741	0.843885	0.00355841	0.27727	0.564334	-0.289022	0.555418	1.43432	1.3813e-08	0.0210583	0.970314	0.0331718	0.989671	-0.251893	0.865111	0.623734	0.0605025	0.866245	0.0068049	0.303404	0.656556	-0.213144	0.796889	0.137688	0.999983	0.00625067	0.999778	0.0470189	0.984994	-0.0960233	0.999992	0.149079	0.999994	-0.328102	0.999959
Arhgap20	-0.25569	0.890183	-0.552983	0.422055	0.00376628	0.996507	-0.173697	0.896619	-0.794939	0.123421	-0.911015	0.223734	0.223474	0.892119	-0.290301	0.972047	1.948	0.00442171	1.97914	0.0321491	-0.656738	0.622017	-0.242167	0.920811	0.192004	0.999983	-0.115166	0.999778	-0.07939	0.986129	-0.195646	0.999992	0.0850948	0.999994	-0.113077	0.999959
Arhgap21	-0.438662	0.58407	-0.15886	0.804854	0.225909	0.720745	0.131567	0.886859	-0.52016	0.151214	-0.684464	0.192325	0.567304	0.26853	0.430896	0.718625	-0.138946	0.806565	0.384405	0.37142	0.498372	0.474572	-0.272478	0.784313	0.0510119	0.999983	-0.19877	0.999778	0.317091	0.661543	-0.0610702	0.999992	-0.0609046	0.999994	-0.0134687	0.999959
Arhgap22	0.4145	0.685364	0.179869	0.802341	0.432533	0.475638	0.39605	0.564089	0.352569	0.425546	0.426822	0.483508	0.350225	0.709668	0.210312	0.977826	0.520055	0.346844	0.345068	0.596265	0.0801086	0.982014	0.785216	0.255895	0.0377766	0.999983	-0.0302669	0.999778	-0.138004	0.918468	0.045664	0.999992	0.263507	0.999994	0.157965	0.999959
Arhgap23	0.0441604	0.971741	-0.579251	0.106123	0.169631	0.770126	0.404875	0.38868	-0.147924	0.712988	-0.110075	0.873225	0.95565	0.0373529	0.442761	0.640243	0.752427	0.048689	0.47233	0.264953	-0.756713	0.103307	-0.184069	0.888436	0.0629401	0.999983	-0.0334736	0.999778	0.155652	0.861258	0.0516384	0.999992	0.13282	0.999994	0.0485493	0.999959
Arhgap24	-0.237346	0.843818	-0.563224	0.210951	-0.31178	0.608277	-0.114425	0.910071	-0.562526	0.134672	-0.203516	0.763931	-0.0416123	0.993365	0.802496	0.314015	0.666676	0.157867	0.309006	0.552868	-0.176588	0.906778	-0.0243232	0.996107	0.152117	0.999983	0.206939	0.999778	0.67558	0.236739	-0.0457269	0.999992	0.244449	0.999994	-0.0799439	0.999959
Arhgap25	0.34257	0.73889	0.431881	0.383929	-0.36893	0.524179	0.158348	0.864873	0.526639	0.170725	0.127353	0.881132	-0.160597	0.853315	-0.277836	0.919428	0.590977	0.195116	0.577557	0.211447	0.039762	0.992151	0.654157	0.29409	0.220179	0.999983	-0.213899	0.999778	-0.177217	0.891009	0.284264	0.999992	0.152627	0.999994	-0.356291	0.999959
Arhgap26	-0.241788	0.828845	0.0945734	0.90176	0.0859317	0.919132	0.157864	0.855766	-0.502471	0.167044	-0.606986	0.243482	0.939256	0.0347221	0.138504	0.989467	-0.0123952	0.982111	0.529624	0.196687	-0.126255	0.930565	-0.887743	0.055043	0.102035	0.999983	-0.00156551	0.999778	-0.110072	0.928866	-0.0143665	0.999992	0.0036577	0.999994	-0.0854253	0.999959
Arhgap27	0.176974	0.854067	-0.133852	0.796609	0.541728	0.150954	0.886621	0.00625366	0.37672	0.21011	0.119735	0.839829	0.242534	0.638136	-0.0672586	0.989467	-0.269076	0.47848	0.0815991	0.855774	0.173708	0.856576	0.166284	0.878332	0.198779	0.999983	0.133889	0.999778	-0.148213	0.873392	0.283258	0.999992	0.00569746	0.999994	0.197143	0.999959
Arhgap28	-0.400084	0.696645	-0.796581	0.0760127	-0.282937	0.682797	-0.485006	0.42953	-0.625208	0.121588	-0.75522	0.198321	0.571229	0.420512	0.0206471	0.989564	0.610424	0.238982	0.0108434	0.987441	-0.626668	0.419699	-0.065798	0.996107	0.541403	0.999983	0.168073	0.999778	-0.962642	0.149677	0.0773665	0.999992	-0.231257	0.999994	0.0507586	0.999959
Arhgap29	-0.356163	0.703216	-0.215398	0.716543	-0.376729	0.491416	-0.0743479	0.9559	-0.817217	0.0189735	-0.702789	0.187212	-0.0317568	0.999876	0.238262	0.942119	1.02035	0.0122062	-0.150879	0.782827	-0.111931	0.946965	0.0859697	0.973372	0.325288	0.999983	-0.0437124	0.999778	-0.0818563	0.962646	0.239309	0.999992	0.0080323	0.999994	0.0250402	0.999959
Arhgap30	0.817584	0.236576	1.32843	0.00110865	-0.370904	0.567129	0.716496	0.19226	1.34584	0.000347711	-0.172699	0.833785	-0.21979	0.799888	-0.675701	0.505527	0.690256	0.148447	0.577059	0.225435	-0.170982	0.919613	0.743957	0.231598	0.0482614	0.999983	0.159642	0.999778	0.314253	0.768539	0.540056	0.999992	0.106369	0.999994	-0.272013	0.999959
Arhgap31	-0.356637	0.693858	-0.497437	0.261405	0.064228	0.948199	0.137376	0.880017	-1.02007	0.00220234	-0.588872	0.255934	0.462458	0.44468	0.0320825	0.989467	1.09853	0.00650297	1.19853	0.00433733	-0.378114	0.664351	0.254774	0.8286	0.0754821	0.999983	0.0303853	0.999778	0.209163	0.819844	0.26048	0.999992	-0.0261695	0.999994	0.264666	0.999959
Arhgap32	-0.614995	0.329936	-0.342611	0.473352	0.271979	0.638558	0.133598	0.880017	-0.477565	0.1789	-0.604947	0.231487	0.616924	0.198017	-0.153777	0.987555	0.546451	0.179476	0.925929	0.0118292	0.144502	0.918854	-0.341488	0.665299	0.232636	0.999983	-0.198588	0.999778	0.412989	0.500642	-0.0847106	0.999992	0.256241	0.999994	0.0842472	0.999959
Arhgap33	-0.0576992	0.973082	-0.310329	0.673056	0.863969	0.161712	0.548825	0.457681	0.103367	0.890135	0.00849195	0.991705	0.118563	0.942173	0.045561	0.989467	0.342643	0.620682	1.6616	0.00559643	0.106736	0.971087	-0.528481	0.605887	-0.0391714	0.999983	-0.267094	0.999778	-0.346237	0.731634	-0.0476023	0.999992	0.0305408	0.999994	-0.045498	0.999959
Arhgap35	-0.325121	0.684352	-0.351566	0.413199	0.219352	0.693472	0.326826	0.530916	-0.101569	0.826582	-0.572347	0.220589	0.729483	0.0775698	-0.350743	0.768421	0.211933	0.634005	0.890725	0.0088017	-0.016944	0.992151	0.0338423	0.996107	-0.0356663	0.999983	-0.0631437	0.999778	0.101725	0.925803	-0.0731899	0.999992	-0.00172148	0.999994	0.0379961	0.999959
Arhgap36	-1.76233	0.450223	-0.337338	0.869161	0.449142	0.864613	-0.280622	0.938315	-2.1507	0.104447	-0.20276	0.930878	-0.970186	0.835622	0.58593	0.989467	0.966841	0.733003	0.283278	0.922405	-1.36768	0.568203	-2.26923	0.508524	0.303859	0.999983	0.41743	0.999778	0.626071	0.658769	-0.387419	0.999992	0.235079	0.999994	0.326924	0.999959
Arhgap39	0.165892	0.869621	-0.380422	0.29398	0.895256	0.0126836	1.01906	0.0012261	-0.40268	0.162183	0.339492	0.430527	0.724433	0.0453491	0.0942392	0.989467	-0.202578	0.616778	0.637446	0.0467058	0.058683	0.973641	0.00295118	0.997949	-0.0869085	0.999983	-0.121661	0.999778	-0.0519083	0.974365	0.10354	0.999992	0.235904	0.999994	0.190598	0.999959
Arhgap4	0.616697	0.488127	0.770573	0.116238	0.127207	0.893145	0.302852	0.714291	0.834398	0.0451012	0.137189	0.891491	-0.26302	0.775377	-0.683839	0.551261	0.453331	0.424266	0.767674	0.133543	-0.3918	0.725199	0.90933	0.153184	0.431089	0.999983	0.0590426	0.999778	-0.334984	0.742808	0.445985	0.999992	0.452547	0.999994	-0.157768	0.999959
Arhgap40	-1.30013	NA	2.877	NA	-0.246097	NA	-0.127337	NA	1.70728	0.583316	-0.422846	NA	-2.13887	NA	-1.55782	0.972047	-1.46555	NA	-2.41245	NA	0.771175	NA	1.14245	NA	1.14171	0.999983	-2.16822	0.999778	0.635707	NA	-0.534413	0.999992	-0.176536	NA	1.79879	0.999959
Arhgap42	-0.343745	0.49946	-0.518262	0.0532633	-0.161885	0.705663	0.0369212	0.977588	-0.734065	0.00115542	-0.423796	0.232908	0.391541	0.273974	0.013591	0.989467	-0.0660878	0.879723	0.0439495	0.902844	-0.124542	0.89144	0.0526209	0.979132	0.406617	0.999983	-0.100503	0.999778	-0.0502113	0.972635	0.030642	0.999992	-0.0286283	0.999994	-0.00137293	0.999959
Arhgap44	-0.0013092	0.999144	-0.300375	0.407837	-0.00783582	0.98716	0.390817	0.316577	-0.504678	0.0580211	-0.310531	0.441103	-0.320764	0.652378	0.784354	0.217432	1.35964	0.00137332	0.134044	0.825716	-1.2568	0.00238153	-0.196764	0.897749	-0.143026	0.999983	-0.101226	0.999778	-0.324296	0.499955	-0.0762438	0.999992	-0.0176651	0.999994	-0.0354099	0.999959
Arhgap45	0.717194	0.548018	0.816076	0.221421	0.465508	0.601888	0.544239	0.546864	1.0651	0.0473011	0.259064	0.807587	-0.574307	0.525396	-0.462975	0.876593	0.893798	0.166562	0.743495	0.247768	-0.0995103	0.982555	1.17761	0.127789	0.882556	0.999983	-0.376367	0.999778	-0.996969	0.307498	0.115821	0.999992	0.227924	0.999994	-0.384565	0.999959
Arhgap5	-0.598279	0.515264	0.0163066	0.98456	0.0247245	0.977951	-0.303115	0.720425	-1.12201	0.00637948	-0.661094	0.29358	-0.0804371	0.958694	-0.11174	0.989467	0.344603	0.552881	-0.0467471	0.939599	0.366539	0.743226	0.259617	0.865824	0.247585	0.999983	-0.384126	0.999778	0.327241	0.731634	0.0109318	0.999992	-0.316217	0.999994	-0.0886817	0.999959
Arhgap6	-0.276233	0.794902	-0.493788	0.272248	-0.0508766	0.960682	0.082823	0.944652	-1.11905	0.000767777	-0.50609	0.334031	-0.343841	0.650576	0.311386	0.888719	1.12475	0.00924748	0.962095	0.0466146	-0.673174	0.28521	0.352153	0.720332	0.36505	0.999983	-0.288054	0.999778	0.906379	0.0579869	0.484362	0.999992	0.421926	0.999994	0.14041	0.999959
Arhgap8	0.461512	0.826497	0.449152	0.67108	1.19979	0.170272	0.999498	0.296219	0.954803	0.163928	0.591962	0.577994	-0.80775	0.482522	1.50665	0.362707	1.94157	0.0292372	1.999	0.0169101	2.08734	0.0536913	0.795324	0.612229	-0.191406	0.999983	0.281346	0.999778	0.314459	0.887649	-0.229684	0.999992	0.48769	0.999994	0.535535	0.999959
Arhgap9	0.996341	0.159619	1.15616	0.0144795	-0.065985	0.960682	0.60998	0.358643	1.60784	8.73858e-05	0.22648	0.7891	-0.629373	0.362758	-0.508486	0.763016	0.926925	0.0772254	0.376366	0.524087	-0.0123572	0.994354	1.01321	0.111765	0.20357	0.999983	-0.190204	0.999778	0.414536	0.704555	0.184515	0.999992	0.446964	0.999994	-0.0396532	0.999959
Arhgdia	0.267267	0.510054	0.127681	0.672692	0.306229	0.235216	0.458818	0.0486988	0.636041	0.000310924	0.133241	0.681729	0.307716	0.260886	0.168769	0.865648	-0.306888	0.173536	0.0579129	0.846299	0.166351	0.733103	-0.121934	0.849302	-0.0911596	0.999983	-0.0280867	0.999778	0.0769381	0.896287	-0.0163252	0.999992	0.0984317	0.999994	0.0676245	0.999959
Arhgdib	0.365909	0.625499	0.528249	0.160525	-0.423223	0.34628	0.0175798	0.99019	0.60631	0.0528115	-0.0456641	0.941565	-0.177419	0.79087	-0.307934	0.837738	0.968913	0.00503252	0.261875	0.520609	-0.225324	0.81247	1.1973	0.000667193	0.205254	0.999983	-0.178542	0.999778	0.218324	0.774436	-0.00473835	0.999992	0.382722	0.999994	0.106826	0.999959
Arhgdig	0.0657357	0.97851	0.872292	0.361604	0.761453	0.485502	-0.570848	0.690455	1.7211	0.0115846	0.571233	0.633274	-0.00695806	0.999876	0.733483	0.819111	-0.126288	0.907209	-0.0457899	0.965105	1.25251	0.298891	1.25253	0.247813	-0.019512	0.999983	0.04491	0.999778	0.287541	0.894521	-0.139186	0.999992	0.148498	0.999994	-0.137345	0.999959
Arhgef1	0.531268	0.540289	0.297851	0.629077	0.733453	0.160538	0.949795	0.0522182	0.724932	0.0676166	0.139467	0.87614	0.265138	0.733604	0.0381319	0.989467	0.362537	0.487951	0.63982	0.15904	0.242219	0.854684	0.377471	0.693332	0.620007	0.999983	0.509079	0.999778	-0.299092	0.744817	-0.0127547	0.999992	-0.117015	0.999994	0.0913487	0.999959
Arhgef10	-0.368923	0.480684	-0.53635	0.0545862	0.189	0.659273	0.243792	0.564116	-0.46093	0.0640335	-0.280311	0.460217	0.188218	0.762501	0.333758	0.726253	0.990914	0.00186354	0.363072	0.338467	-0.905092	0.00776422	0.0586964	0.98292	0.0978916	0.999983	-0.0514211	0.999778	0.114984	0.880817	0.0382982	0.999992	0.154167	0.999994	0.0564269	0.999959
Arhgef10l	0.331028	0.734419	0.145128	0.829608	0.189158	0.776442	0.576151	0.244648	0.231447	0.584356	0.0404023	0.952853	-0.112359	0.907179	0.185929	0.974596	0.469535	0.307074	0.695151	0.0979701	0.212118	0.866587	0.416204	0.585363	-0.255942	0.999983	0.0798163	0.999778	-0.449025	0.473442	-0.0158507	0.999992	-0.0731595	0.999994	-0.142929	0.999959
Arhgef11	-0.236087	0.704472	-0.466617	0.0875271	0.433768	0.169055	0.423339	0.19175	-0.504265	0.0311382	-0.269568	0.455453	0.645367	0.0339301	-0.158274	0.940825	-0.0165275	0.965042	0.455109	0.0909457	0.0393269	0.98787	-0.102919	0.920811	-0.0691479	0.999983	0.103119	0.999778	0.0324742	0.994619	-0.0391755	0.999992	0.132791	0.999994	0.0878245	0.999959
Arhgef12	-0.27828	0.699698	-0.487128	0.135759	-0.0522922	0.945842	-0.059415	0.952559	-0.727148	0.00626626	-0.742281	0.0577773	0.396868	0.343422	0.170151	0.954669	0.247968	0.501896	0.470868	0.137843	0.106811	0.925981	-0.163705	0.873396	0.038974	0.999983	-0.168721	0.999778	0.104787	0.904446	-0.132017	0.999992	-0.05216	0.999994	0.0206983	0.999959
Arhgef15	0.163673	0.881179	-0.966539	0.0020489	-0.147337	0.807766	-0.104874	0.897173	-0.772711	0.00906962	-0.481265	0.286723	0.435461	0.464128	0.367928	0.793751	0.994404	0.0114413	0.263736	0.594093	-0.453279	0.523547	-0.104677	0.955257	0.350601	0.999983	0.356638	0.999778	-0.396049	0.555059	0.814757	0.999992	0.797113	0.999994	0.039878	0.999959
Arhgef16	0.0885105	0.971741	0.0403184	0.955858	0.85943	0.0821389	0.658659	0.215942	0.679514	0.0724487	0.61806	0.273906	0.286293	0.675213	-0.0083135	0.995054	-0.718875	0.0983213	-0.323023	0.493956	-0.0226774	0.992151	-0.106212	0.958285	-0.142207	0.999983	-0.203552	0.999778	-0.155121	0.904587	0.421097	0.999992	-0.262031	0.999994	0.0754691	0.999959
Arhgef17	0.00180532	0.99872	-0.458973	0.208807	0.28913	0.539747	0.385036	0.397528	-0.387963	0.216927	-0.146597	0.79919	0.396957	0.433412	0.213827	0.929094	0.774745	0.0272483	0.880499	0.0128184	-0.534026	0.301352	-0.207694	0.83703	-0.117427	0.999983	0.0213224	0.999778	0.154619	0.854736	-0.00199479	0.999992	0.172002	0.999994	0.106551	0.999959
Arhgef18	0.109057	0.895227	-0.240362	0.42568	0.393308	0.177504	0.477405	0.090356	-0.269681	0.249616	0.172457	0.638892	0.116153	0.809752	-0.147794	0.939292	0.192855	0.517023	0.549948	0.0227732	-0.0449031	0.97737	0.04135	0.986743	-0.123564	0.999983	0.213006	0.999778	-0.00455761	0.996583	0.180996	0.999992	-0.0124611	0.999994	0.264187	0.999959
Arhgef19	1.07253	0.345704	0.282539	0.795738	0.643604	0.485602	1.50514	0.0435705	0.913511	0.137786	0.414435	0.692099	0.200847	0.889355	1.44009	0.185261	-1.46122	0.0327704	-0.551603	0.462802	0.264295	0.914741	0.27778	0.917529	-0.798297	0.999983	0.636255	0.999778	-0.679035	0.608686	-0.0414089	0.999992	-0.0431983	0.999994	-0.0631038	0.999959
Arhgef2	-0.197274	0.704441	-0.397397	0.0801457	0.645306	0.00763472	0.708692	0.000789726	-0.684866	0.000216466	0.148922	0.65959	0.257327	0.402013	-0.0440759	0.989467	-0.145789	0.60422	0.263646	0.263726	0.0020592	0.997275	0.136897	0.830465	0.024985	0.999983	-0.0907477	0.999778	0.00594449	0.996583	0.00221403	0.999992	0.22037	0.999994	0.0598868	0.999959
Arhgef25	0.00751835	0.994971	-0.846343	0.0161807	0.295398	0.579233	-0.062346	0.96267	-0.977567	0.00166019	0.175662	0.775689	-0.46103	0.389332	0.310378	0.859193	0.641587	0.108959	0.0659884	0.897146	-1.23058	0.00201874	0.219622	0.850328	-0.126962	0.999983	0.48851	0.999778	0.270849	0.697064	0.206582	0.999992	-0.111015	0.999994	0.037189	0.999959
Arhgef26	-0.151022	0.866601	-0.43415	0.165525	0.31853	0.406965	0.468127	0.185945	-0.936006	0.000108987	0.104526	0.847544	0.418812	0.275338	-0.0722861	0.989467	0.413731	0.188185	0.870928	0.0017548	-0.25918	0.684455	0.0279719	0.996107	0.0170377	0.999983	-0.0135704	0.999778	0.295917	0.551109	-0.0798946	0.999992	-0.229796	0.999994	0.0759512	0.999959
Arhgef28	-0.265085	0.751085	-1.06194	0.00033384	-0.0269121	0.966033	0.141638	0.843594	-1.47212	3.95875e-08	-0.4829	0.27297	-0.00704974	0.999876	-0.438471	0.618455	0.334479	0.430636	1.10341	0.00207189	-0.281017	0.724081	-0.17907	0.884045	0.179738	0.999983	-0.187096	0.999778	0.324573	0.572854	0.155036	0.999992	0.189646	0.999994	0.147905	0.999959
Arhgef3	-0.113382	0.959972	-0.0677606	0.927054	0.00700212	0.991349	0.23443	0.75914	-0.306715	0.464681	-0.0982278	0.920312	0.158034	0.847594	0.344372	0.85636	0.385868	0.42265	0.136323	0.811355	0.238704	0.842696	1.03667	0.0283562	0.047984	0.999983	0.0428734	0.999778	0.672708	0.222143	0.168968	0.999992	0.21353	0.999994	0.300145	0.999959
Arhgef33	-0.899812	0.851161	-0.819161	0.688673	3.36028	0.198136	-0.138273	0.99019	-0.677405	0.730575	-2.36403	0.284398	2.45792	0.415668	1.0673	0.95221	-3.26474	0.179024	1.9445	0.417505	-1.40952	0.746738	-2.28712	0.579669	-0.658758	0.999983	0.123525	0.999778	-0.752558	0.77967	-0.0137245	0.999992	-0.901464	0.999994	-0.551972	0.999959
Arhgef37	-0.0151218	0.988083	-0.616165	0.0873386	0.0898163	0.90166	-0.628784	0.123168	-0.195527	0.609602	-0.0907562	0.909391	-0.761115	0.123167	0.00658817	0.995401	0.00581804	0.99259	-0.30575	0.538374	0.122832	0.931197	0.498274	0.442437	-0.0990715	0.999983	0.266878	0.999778	0.0342443	0.996583	-0.0638796	0.999992	0.0375521	0.999994	0.104993	0.999959
Arhgef38	-0.347112	0.880763	-0.409638	0.700436	-0.111755	0.953978	-0.0876488	0.985256	-1.39772	0.0288439	-0.790392	0.417818	-0.413351	0.748218	0.249096	0.989467	-0.428837	0.638893	0.0190701	0.983819	0.273687	0.919613	-0.455355	0.821346	-0.39177	0.999983	0.0933177	0.999778	0.157027	0.960905	0.252258	0.999992	-0.82324	0.999994	0.109999	0.999959
Arhgef39	-0.0394844	0.983162	0.813878	0.250151	-0.0159932	0.987915	0.191682	0.90679	2.41145	4.09882e-06	0.800423	0.365839	-0.0181931	0.999876	-0.247076	0.989234	-0.0304124	0.972394	0.320438	0.675558	0.230193	0.921084	-0.408241	0.803283	-0.804033	0.999983	-2.00871	0.999778	-0.593998	0.878262	-0.36897	0.999992	-0.8613	0.999994	-1.03237	0.999959
Arhgef4	0.330338	0.460547	-0.172833	0.574887	0.265216	0.414427	0.719372	0.00346937	-0.152042	0.520985	0.0130433	0.974994	-0.0857572	0.985316	0.163751	0.989467	0.981823	0.151667	0.548095	0.415271	0.689124	0.446292	1.32782	0.0825142	-0.149028	0.999983	0.00410259	0.999778	-0.0282898	0.986165	-0.0610646	0.999992	0.079298	0.999994	0.162987	0.999959
Arhgef40	-0.0114483	0.993851	-0.870034	0.0463081	0.330278	0.612327	0.42793	0.503482	-0.228563	0.63816	-0.353697	0.573067	0.0391443	0.999336	-0.0113065	0.993562	0.39804	0.457552	0.708135	0.153919	-0.508478	0.56311	-0.0619851	0.996107	-0.283049	0.999983	0.242	0.999778	-0.617967	0.332371	0.133418	0.999992	-0.0854827	0.999994	-0.180609	0.999959
Arhgef5	0.0343839	0.973282	-0.0531929	0.927198	0.682674	0.0672122	0.569867	0.134143	0.237293	0.47356	0.0754393	0.922216	0.739215	0.0418724	0.287917	0.820234	-0.71914	0.0256728	0.0882094	0.845968	0.174506	0.855027	-0.112177	0.928459	-0.0133877	0.999983	0.192355	0.999778	-0.261478	0.709954	0.197627	0.999992	0.212682	0.999994	-0.0245104	0.999959
Arhgef6	0.127614	0.929122	0.705388	0.0449234	-0.26745	0.611699	-0.0957213	0.915306	0.385559	0.253895	-0.476102	0.310057	0.0290539	0.999876	-0.595812	0.410476	0.967391	0.00626964	1.18583	0.000919203	-0.292853	0.722243	0.492307	0.382693	0.0797814	0.999983	-0.162106	0.999778	0.418141	0.463296	0.169855	0.999992	-0.179009	0.999994	0.00121407	0.999959
Arhgef7	0.00316616	0.995995	-0.290436	0.1401	0.0917701	0.770556	0.239686	0.329168	-0.113626	0.568718	-0.155549	0.55732	0.401511	0.0726931	-0.0641277	0.989467	0.0410033	0.882221	0.311463	0.108092	-0.0375885	0.969977	-0.305512	0.246863	-0.107346	0.999983	-0.048271	0.999778	0.0679791	0.895387	0.0162567	0.999992	0.0725036	0.999994	0.0237569	0.999959
Arhgef9	-0.360187	0.650063	-0.692578	0.0664739	-0.173676	0.788578	-1.5956	8.84858e-07	-2.01579	4.8658e-11	-1.27144	0.00122829	1.00856	0.607202	0.47514	0.87937	1.26463	0.096832	-0.452918	0.709053	-1.07597	0.257204	-0.303664	0.915441	0.117534	0.999983	-0.20329	0.999778	0.369192	0.494801	-0.0805954	0.999992	0.20007	0.999994	-0.00260568	0.999959
Arid1a	-0.134118	0.898819	0.151173	0.750771	0.193873	0.691066	0.239818	0.626767	-0.13587	0.704523	-0.494234	0.227856	0.688791	0.0538646	0.0124382	0.989787	0.41781	0.21297	1.00322	0.000661243	0.11093	0.921299	-0.0995905	0.938669	0.16016	0.999983	0.0223209	0.999778	0.410864	0.369178	0.0563197	0.999992	0.118879	0.999994	0.0946224	0.999959
Arid1b	-0.0715664	0.965102	-0.168833	0.674717	0.13944	0.768619	0.121191	0.841202	-0.270888	0.321213	-0.325344	0.385282	0.742146	0.0182945	0.0495392	0.989467	0.358594	0.245462	1.26585	8.80362e-07	0.2727	0.648074	-0.00209982	0.997949	-0.0627313	0.999983	-0.199385	0.999778	0.0880186	0.914339	-0.00103461	0.999992	0.0691614	0.999994	-0.0525254	0.999959
Arid2	-0.435036	0.601497	-0.0130226	0.984999	0.112432	0.889195	-0.0265572	0.99019	-0.613287	0.0927112	-0.603153	0.257627	0.679252	0.189741	-0.0824639	0.989467	0.763458	0.0703515	1.15548	0.0039921	0.107491	0.94994	-0.117966	0.947983	0.111809	0.999983	-0.0530649	0.999778	0.499313	0.41999	-0.088654	0.999992	-0.0128965	0.999994	0.035504	0.999959
Arid3a	0.358595	0.634296	0.490358	0.196904	0.102823	0.8825	0.685204	0.0902273	0.565866	0.0695689	-0.291139	0.561596	0.169926	0.80872	-0.105916	0.989467	-0.170521	0.717113	0.747387	0.0403239	0.266143	0.750275	0.141725	0.920284	-0.0399113	0.999983	0.184026	0.999778	-0.215349	0.789811	0.0661352	0.999992	0.033296	0.999994	0.0212563	0.999959
Arid3b	-0.0649621	0.971741	0.736145	0.0300516	0.61558	0.161712	0.611181	0.148552	0.921821	0.00155034	-0.15306	0.808628	0.564491	0.220802	-0.00820494	0.993971	-0.199261	0.673331	0.350756	0.404454	0.0900886	0.952481	0.412926	0.52817	-0.194163	0.999983	0.116526	0.999778	-0.360809	0.592224	-0.230854	0.999992	0.0724103	0.999994	-0.0892507	0.999959
Arid3c	1.53523	0.815729	0.881707	0.77854	0.803026	NA	-1.56427	0.683409	2.81458	0.149191	-2.27997	0.372658	-0.737535	NA	2.49706	0.436664	-2.39124	NA	3.17253	NA	-0.33015	NA	-1.1053	NA	0.141483	0.999983	0.0720343	0.999778	-1.45174	0.482569	0.223103	0.999992	-0.0885319	0.999994	-0.961296	0.999959
Arid4a	-0.177246	0.861684	0.204483	0.666702	0.279055	0.563301	0.104534	0.894728	-0.640848	0.0291506	-0.253493	0.603838	0.244179	0.656398	-0.0723653	0.989467	0.538218	0.13081	0.435392	0.225297	-0.000752929	0.999135	0.0685155	0.975567	0.0488035	0.999983	-0.0917615	0.999778	0.689526	0.0918513	-0.000513841	0.999992	0.161377	0.999994	0.032253	0.999959
Arid4b	-0.31477	0.70684	-0.0123111	0.984429	-0.0379351	0.960682	-0.167872	0.823121	-0.821109	0.00756091	-0.585526	0.216022	0.272506	0.638072	-0.0998501	0.989467	0.450547	0.2534	-0.0720695	0.881466	-0.0164891	0.992151	-0.0950649	0.956	0.174895	0.999983	-0.167057	0.999778	0.584013	0.224528	0.010414	0.999992	-0.0986145	0.999994	0.0247486	0.999959
Arid5a	0.875598	0.089162	1.07003	0.00299629	0.233571	0.716056	1.09145	0.0065654	1.19986	0.000207276	0.443857	0.407749	-0.123732	0.902647	-0.0533352	0.989467	0.556483	0.246728	0.15287	0.801875	-0.133547	0.933295	0.628335	0.341681	0.30694	0.999983	0.205869	0.999778	-0.0512455	0.993835	0.386619	0.999992	0.286746	0.999994	-0.102136	0.999959
Arid5b	-0.150953	0.873245	0.0525816	0.924161	-0.118453	0.828142	-0.038303	0.982337	-0.0631606	0.88475	-0.286726	0.488412	0.223719	0.648307	0.217048	0.893108	0.0784159	0.86934	-0.11723	0.770086	-0.117445	0.915743	-0.201034	0.802625	0.213743	0.999983	-0.0144596	0.999778	0.452729	0.287739	0.0357954	0.999992	0.295776	0.999994	0.237163	0.999959
Arih1	-0.19206	0.693858	0.180126	0.506428	-0.0458692	0.920066	-0.0597095	0.909054	-0.321177	0.0931424	-0.161612	0.600082	-0.119395	0.75917	-0.0293184	0.989467	0.243955	0.309158	0.0354352	0.900962	0.0309549	0.988839	0.102	0.899064	0.000929255	0.999983	-0.145122	0.999778	0.304569	0.315889	-0.0323346	0.999992	-0.0870787	0.999994	0.0760963	0.999959
Arih2	0.0217816	0.971741	0.00664842	0.981868	-0.089675	0.746848	0.109212	0.707795	-0.0693981	0.718721	0.109042	0.672201	-0.171333	0.490103	-0.0921215	0.954669	-0.380443	0.0293069	-0.372061	0.0274563	-0.0489918	0.940464	-0.141257	0.711202	-0.137268	0.999983	0.0999458	0.999778	-0.0975868	0.789837	0.0466134	0.999992	0.0731258	0.999994	-0.0490782	0.999959
Arl1	-0.235586	0.656748	0.0743107	0.869624	-0.424317	0.130907	-0.390188	0.181288	-0.291171	0.196625	-0.0367035	0.933476	-0.545154	0.0453854	-0.148477	0.931191	-0.157739	0.60122	-0.63348	0.00604911	-0.108372	0.892529	-0.115568	0.898084	0.0231071	0.999983	-0.160311	0.999778	0.337841	0.333763	-0.019754	0.999992	-0.0806555	0.999994	0.0376403	0.999959
Arl10	-0.169068	0.456854	-0.0613795	0.743657	-0.22935	0.119628	-0.0478227	0.864923	-0.232917	0.0307242	0.136341	0.421581	-0.081054	0.77276	-0.182591	0.603189	-0.00718243	0.973988	-0.0342294	0.869643	0.0553719	0.915743	0.244091	0.229148	0.0104697	0.999983	0.0918189	0.999778	-0.0869049	0.72841	0.00930674	0.999992	0.109827	0.999994	0.115382	0.999959
Arl11	0.238349	0.919387	0.209681	0.849038	-0.397724	0.679797	0.385056	0.728181	0.0890025	0.93298	0.583984	0.49085	-0.422718	0.748218	-1.02437	0.542526	0.777905	0.337197	-0.95906	0.221979	-0.00239956	0.998825	0.574625	0.726487	0.357105	0.999983	-3.92053	0.999778	-1.42402	0.40447	0.153159	0.999992	-4.99565	0.777333	0.32833	0.999959
Arl13a	NA	NA	NA	NA	NA	NA	NA	NA	NA	NA	NA	NA	NA	NA	NA	NA	NA	NA	NA	NA	NA	NA	NA	NA	NA	NA	NA	NA	NA	NA	NA	NA	NA	NA	NA	NA
Arl13b	-0.607644	0.362306	-0.142915	0.83393	0.293169	0.62171	0.213742	0.780792	-0.674294	0.0547844	-0.47856	0.361151	0.224764	0.788189	-0.026826	0.989467	1.38383	0.00109063	1.33734	0.00495334	-0.387922	0.664897	0.110548	0.958637	0.0652598	0.999983	-0.098144	0.999778	0.561083	0.350106	0.17095	0.999992	0.0122087	0.999994	0.197326	0.999959
Arl14	0.23854	0.935794	1.51635	0.0248436	-0.512139	0.599005	-0.637815	0.557905	-0.475662	0.544684	1.10774	0.246056	-0.194188	0.878686	0.301771	0.96582	-1.37764	0.0238671	-1.51071	0.00967885	-0.332687	0.85433	-0.738248	0.47018	1.07835	0.999983	0.703108	0.999778	1.27098	0.314088	-0.938144	0.999992	0.111379	0.999994	-0.518804	0.999959
Arl14epl	-0.356626	NA	0.397758	NA	-1.20781	NA	-0.127328	NA	0.309307	NA	-0.422816	NA	-0.00839018	NA	0.251146	NA	-0.503724	NA	0.397672	NA	-0.102786	NA	0.908358	NA	-0.0246045	NA	-1.71619	0.999778	-0.902568	NA	-0.0480727	0.999992	-1.53398	NA	-0.289977	0.999959
Arl15	-0.395869	0.546106	-0.20405	0.665882	-0.0437662	0.960682	-0.503561	0.221292	-0.751615	0.00890154	-0.331967	0.464308	0.194761	0.743127	0.349832	0.739736	0.0412987	0.926771	-0.198339	0.627578	0.111843	0.927004	-0.940984	0.00935175	0.222897	0.999983	-0.288934	0.999778	0.0548695	0.976645	-0.0801458	0.999992	0.0453241	0.999994	-0.0205396	0.999959
Arl16	-0.00588781	0.995967	-0.201398	0.675798	0.28715	0.548084	-0.0459366	0.978876	0.212867	0.543396	0.762196	0.0844039	-0.19003	0.760097	0.000102907	0.999816	-0.140526	0.77569	-0.655876	0.0573481	-0.1751	0.871666	0.365542	0.576253	-0.0902031	0.999983	-0.0973543	0.999778	-0.420315	0.446957	-0.00867077	0.999992	0.131327	0.999994	0.0197807	0.999959
Arl2	0.300473	0.750774	0.0284	0.965033	0.254443	0.657966	-0.0656857	0.960983	0.809246	0.012543	0.263329	0.639704	-0.1069	0.896665	0.283576	0.878976	-0.53651	0.180345	-0.488619	0.208755	-0.141089	0.920159	0.00917092	0.996107	-0.114338	0.999983	0.152957	0.999778	-0.295272	0.67348	-0.0495533	0.999992	-0.00904806	0.999994	0.0084992	0.999959
Arl3	-0.021239	0.978956	-0.286545	0.383188	-0.122405	0.795728	-0.471751	0.149643	-0.254455	0.34173	-0.0670674	0.917705	-0.44783	0.261579	0.487577	0.406328	-0.109226	0.794817	-0.566186	0.0583581	-0.525006	0.1896	-0.0714953	0.963239	-0.124413	0.999983	-0.0320529	0.999778	0.55992	0.0894687	-0.0391447	0.999992	-0.0119158	0.999994	-0.0855983	0.999959
Arl4a	-0.0607169	0.971741	-0.507954	0.285342	-0.452542	0.408447	-0.215909	0.795035	-0.592139	0.118509	0.453621	0.417993	-0.104152	0.914972	0.127525	0.989467	-0.499526	0.273712	-0.334223	0.470687	-0.241949	0.838575	0.036017	0.996107	-0.0688483	0.999983	-0.147276	0.999778	0.297604	0.715641	-0.0523099	0.999992	0.0253268	0.999994	-0.0481056	0.999959
Arl4c	0.505588	0.761734	1.00755	0.128196	0.303574	0.78636	0.679744	0.461106	1.23658	0.0238679	0.0422045	0.969588	0.489978	0.719986	0.0540009	0.989467	0.954544	0.324538	-0.0431401	0.967834	-0.299938	0.906272	1.55985	0.111846	-0.397817	0.999983	0.496336	0.999778	0.0303953	0.996583	0.0375715	0.999992	0.0691963	0.999994	0.00233194	0.999959
Arl4d	0.351914	0.812118	-0.553396	0.399312	-0.189037	0.853057	-0.558697	0.466793	-1.54353	0.000685627	0.205928	0.835657	-0.017554	0.999876	0.398504	0.888381	-0.559643	0.35836	-0.29579	0.647588	-0.167108	0.934091	0.527682	0.613993	-0.10978	0.999983	0.124679	0.999778	0.0217057	0.996583	0.0386204	0.999992	0.143064	0.999994	0.390602	0.999959
Arl5a	-0.131088	0.848557	-0.169145	0.588298	-0.408315	0.129879	-0.234238	0.478286	-0.680435	0.000435913	-0.374536	0.222345	-0.274309	0.38598	-0.155374	0.911114	-0.134201	0.646507	-0.660565	0.00272459	0.101071	0.897148	-0.0226424	0.996107	0.102493	0.999983	-0.214601	0.999778	0.206669	0.616741	0.065249	0.999992	-0.185063	0.999994	0.104285	0.999959
Arl5b	-0.482203	0.744064	0.08816	0.933583	-0.0838944	0.959638	-0.0889523	0.970918	-0.758178	0.167044	-0.297645	0.758621	-0.0309634	0.999876	0.508858	0.839394	-0.0766243	0.923275	-0.63712	0.313739	-0.148044	0.953683	-1.24077	0.0876334	0.0527833	0.999983	-0.163391	0.999778	0.0390143	0.996583	-0.0536796	0.999992	-0.171201	0.999994	-0.119613	0.999959
Arl5c	-0.356638	NA	-1.52575	NA	-1.20785	NA	-1.92155	NA	-1.6911	NA	0.423967	NA	-0.970151	NA	1.78417	NA	-0.503742	NA	-0.564075	NA	1.87404	NA	-0.0533703	NA	-1.94337	NA	-0.164036	0.999778	4.66312	NA	1.48319	0.999992	0.626778	NA	0.671773	0.999959
Arl6	-0.15538	0.881265	-0.504305	0.149931	-0.347348	0.423562	-0.584831	0.13183	-0.498582	0.0919454	0.176587	0.741161	-1.17804	0.0857543	-0.139319	0.989467	0.70817	0.149136	-0.440481	0.484122	-0.465197	0.601287	0.562992	0.446417	0.155274	0.999983	-0.0810154	0.999778	-0.00880133	0.996583	-0.0524137	0.999992	-0.100396	0.999994	-0.126886	0.999959
Arl6ip1	0.0255351	0.971741	-0.00938489	0.979421	-0.464509	0.0467595	-0.187402	0.539549	0.0783254	0.751499	0.18881	0.506206	-0.51083	0.0252686	-0.572001	0.0253014	-0.378712	0.073203	-0.196988	0.376245	-0.0848317	0.90554	-0.0693069	0.932408	0.0797695	0.999983	-0.014238	0.999778	-0.328537	0.241761	-0.0340724	0.999992	-0.123731	0.999994	-0.08536	0.999959
Arl6ip4	0.373695	0.625499	0.0805987	0.902385	0.54898	0.197269	0.49338	0.284436	0.921242	0.00204393	0.54867	0.247119	-0.1408	0.842004	0.203213	0.949363	-0.246445	0.581011	-0.545048	0.14211	-0.177981	0.877974	-0.0471524	0.996107	-0.291185	0.999983	0.0699454	0.999778	-0.279742	0.675932	-0.00722012	0.999992	-0.180873	0.999994	-0.101921	0.999959
Arl6ip5	0.083207	0.939301	0.232126	0.450575	-0.323755	0.297334	-0.320392	0.325689	0.550419	0.0101571	0.21071	0.548895	-0.42207	0.173151	0.126676	0.964801	-0.446032	0.0833932	-0.591212	0.0136815	0.0292931	0.992151	0.161717	0.810925	-0.0891174	0.999983	-0.0349501	0.999778	-0.266475	0.510488	-0.12056	0.999992	0.0176351	0.999994	-0.0610715	0.999959
Arl6ip6	-0.414789	0.445018	0.457829	0.149193	-0.388158	0.306513	-0.22429	0.643969	-0.284685	0.324732	-0.0320919	0.951238	-0.20729	0.687372	0.248288	0.8572	-0.0985773	0.828981	-0.405271	0.22345	0.195885	0.806629	-0.233937	0.750643	0.0870866	0.999983	-0.170069	0.999778	0.0262337	0.996583	0.167327	0.999992	-0.231065	0.999994	-0.0931451	0.999959
Arl8a	0.161147	0.746909	-0.241269	0.287778	0.172061	0.544661	0.318468	0.189488	0.0431404	0.877671	0.00131526	0.99722	-0.160576	0.658115	-0.280042	0.598173	0.0912865	0.767005	0.133028	0.622116	-0.118628	0.854119	0.431658	0.11954	-0.0359985	0.999983	-0.0332008	0.999778	0.167347	0.640088	-0.0595255	0.999992	0.019796	0.999994	0.0374542	0.999959
Arl8b	-0.214943	0.618405	0.110322	0.716842	-0.203036	0.465091	-0.190156	0.528769	-0.446039	0.0118202	-0.142479	0.641617	-0.471053	0.0450299	-0.302169	0.511365	-0.00168613	0.995544	-0.259439	0.230818	-0.0239998	0.992151	0.0674825	0.936915	0.062061	0.999983	-0.185674	0.999778	0.168281	0.654301	-0.0253327	0.999992	-0.102336	0.999994	-0.00601392	0.999959
Arl9	0.571446	0.803251	0.146578	0.922026	0.213695	NA	-0.103901	0.986977	0.60119	0.473619	-1.06228	0.371818	-0.0665316	NA	-0.464632	0.985171	-0.044144	NA	-1.3518	NA	-1.54097	NA	0.913683	0.776346	0.120876	0.999983	0.928218	0.999778	0.306964	0.894657	0.248636	0.999992	-0.28137	0.999994	-0.0677078	0.999959
Armc1	-0.319578	0.420065	-0.292123	0.239375	-0.488158	0.0553613	-0.441148	0.0817178	-0.700397	0.000153746	-0.101905	0.788839	-0.516738	0.0454233	0.0407677	0.989467	0.209139	0.426698	-0.342895	0.145203	-0.0788009	0.924159	-0.105741	0.903381	0.127993	0.999983	-0.101317	0.999778	0.00577067	0.996583	-0.0334494	0.999992	-0.0958825	0.999994	-0.103979	0.999959
Armc10	-0.0757318	0.932521	-0.258816	0.293558	-0.494542	0.0429209	-0.179696	0.586588	-0.365344	0.0560409	0.0561817	0.907448	-0.292691	0.317621	-0.0827764	0.989467	-0.112889	0.69654	-0.387387	0.0800187	0.0267069	0.992151	0.243168	0.533849	-0.0281314	0.999983	0.0449035	0.999778	-0.40674	0.144339	-0.0556706	0.999992	-0.0343569	0.999994	0.0767831	0.999959
Armc12	0.788381	NA	0.491744	0.822911	1.16199	NA	0.625992	NA	-0.153344	0.93298	0.65525	NA	0.472487	NA	1.61104	0.704043	1.71758	NA	1.00356	NA	1.09744	NA	2.642	NA	0.718015	0.999983	2.8643	0.999778	-0.903158	NA	1.7769	0.999992	-3.09474	NA	2.11724	0.999959
Armc2	-0.165681	0.874833	-1.20734	4.74366e-05	0.0380328	0.960682	0.162025	0.820441	-1.54451	1.93171e-08	-0.158073	0.777032	-0.43476	0.553646	0.610853	0.525406	0.0505536	0.938387	-0.883488	0.0685332	-0.394303	0.624235	-0.537595	0.487981	-0.00768435	0.999983	0.306334	0.999778	0.326221	0.555514	-0.0989266	0.999992	0.18932	0.999994	-0.089092	0.999959
Armc3	-0.0890912	0.968199	-0.420713	0.316103	0.117489	0.868681	0.0266976	0.99019	-1.0317	0.000771199	-0.193884	0.739508	0.00407441	0.999876	-0.150237	0.989467	1.61603	0.258512	-2.02484	0.0584437	-2.11018	0.182989	-0.336044	0.953885	-0.112221	0.999983	0.134295	0.999778	-0.887538	0.079723	0.0528701	0.999992	0.173275	0.999994	0.177565	0.999959
Armc5	0.179358	0.862285	-0.132969	0.807161	0.679836	0.0789678	0.0938821	0.911772	0.331803	0.298078	0.516514	0.246056	0.182104	0.778878	0.18781	0.954669	0.15589	0.743358	-0.164702	0.713904	-0.0655766	0.973365	0.0730363	0.97315	-0.102768	0.999983	0.267926	0.999778	-0.123199	0.895387	0.071235	0.999992	-0.194737	0.999994	-0.0968753	0.999959
Armc6	0.350925	0.713758	0.0999071	0.90176	0.326625	0.570252	0.346733	0.569704	0.86929	0.0109836	0.595856	0.26141	-0.0186642	0.999876	0.36095	0.817333	-0.286314	0.557208	-0.407027	0.345432	0.267439	0.794884	-0.0248621	0.996107	-0.00531826	0.999983	0.0652097	0.999778	-0.340898	0.638076	-0.0141047	0.999992	0.396246	0.999994	0.317179	0.999959
Armc7	0.0492026	0.971741	-0.0284276	0.960158	0.609058	0.122034	0.0954338	0.909796	0.186871	0.597489	0.714047	0.111186	-0.0118229	0.999876	-0.0065944	0.995054	-0.560861	0.113331	-0.00980535	0.98181	-0.338082	0.611468	0.0347852	0.996107	-0.129298	0.999983	0.305271	0.999778	0.201707	0.80265	0.0777594	0.999992	0.0241864	0.999994	-0.0556015	0.999959
Armc8	-0.0858189	0.881764	0.228252	0.262486	-0.1871	0.448365	0.0624806	0.881392	-0.135161	0.46257	-0.208027	0.390398	0.245371	0.330033	0.158433	0.840179	-0.104924	0.669256	-0.0766378	0.758062	-0.173709	0.661033	-0.135981	0.77355	-0.0372523	0.999983	0.106383	0.999778	0.0795255	0.866825	0.0649016	0.999992	0.0666072	0.999994	0.0229789	0.999959
Armc9	0.226442	0.468022	-0.172824	0.378238	0.300342	0.129788	-0.201651	0.377522	0.0184515	0.936915	-0.11109	0.660466	0.308735	0.253898	0.310043	0.378568	0.283575	0.173897	0.137586	0.572429	0.0578362	0.930085	-0.000884393	0.998247	0.0535206	0.999983	0.139307	0.999778	-0.014563	0.996583	-0.0875975	0.999992	0.0248726	0.999994	-0.0267743	0.999959
Armcx1	-0.116089	0.937077	-0.597187	0.0902301	-0.585545	0.14442	-0.636946	0.108765	-0.822435	0.00510994	-0.55698	0.220183	-0.740497	0.139631	0.141192	0.989467	0.356861	0.413682	-0.00576904	0.991264	-0.439504	0.520428	-0.238397	0.823236	-0.0289281	0.999983	-0.0843449	0.999778	-0.100986	0.924751	-0.0263459	0.999992	-0.171491	0.999994	-0.097086	0.999959
Armcx2	-0.231532	0.760842	0.220924	0.578485	-0.432836	0.234228	-0.39875	0.299074	0.388209	0.155718	-0.118798	0.824565	-0.144437	0.868305	0.0476242	0.989467	0.52155	0.171188	0.369983	0.42552	-0.469038	0.420508	-0.0787601	0.970482	-0.0556124	0.999983	-0.0139385	0.999778	0.200421	0.731788	-0.141194	0.999992	0.225507	0.999994	0.087353	0.999959
Armcx3	-0.248131	0.636132	-0.0794118	0.857742	-0.334421	0.268152	-0.442686	0.120319	-0.619805	0.00281815	-0.0633407	0.908412	-0.806797	0.00642195	-0.134533	0.963877	0.364581	0.201186	-0.24454	0.449032	-0.68568	0.0201337	0.210319	0.727111	0.0371844	0.999983	-0.166745	0.999778	0.478661	0.114972	-0.0434381	0.999992	-0.0858008	0.999994	-0.0871396	0.999959
Armcx4	-0.56337	0.585476	-0.59053	0.310771	-0.228574	0.793881	-0.262821	0.794664	-0.732922	0.111418	-0.726551	0.276831	0.0244318	0.999876	-0.495798	0.833601	-0.0509381	0.949699	1.77403	0.0396061	-0.849241	0.336269	-0.200932	0.931647	0.0385513	0.999983	-0.0494597	0.999778	0.226295	0.862849	-0.129929	0.999992	0.228904	0.999994	0.0881092	0.999959
Armcx5	-0.164269	0.750455	-0.213448	0.389714	-0.149468	0.632475	-0.194705	0.519663	-0.470596	0.0078718	-0.0576771	0.899493	-0.320208	0.379201	-0.295667	0.613987	0.11511	0.721983	-0.136865	0.679276	0.0198996	0.992151	0.0100763	0.996107	0.128335	0.999983	-0.0784752	0.999778	0.486118	0.0389362	-0.223169	0.999992	0.26579	0.999994	0.266267	0.999959
Armh1	0.353826	0.780515	-0.63578	0.236425	0.522419	0.409083	-0.440373	0.541257	-0.749026	0.0855808	0.664532	0.296419	-0.751396	0.791175	0.284105	0.989467	0.154741	0.924378	-1.77406	0.128412	-0.437213	0.874731	-0.809912	0.870333	-0.257471	0.999983	-0.166983	0.999778	-0.0735026	0.993785	0.544417	0.999992	-0.069434	0.999994	0.197546	0.999959
Armh2	-0.356626	NA	1.86472	NA	-3.03267	NA	-1.854	NA	1.74047	NA	-0.422816	NA	-0.00839018	NA	0.251146	NA	-0.503724	NA	-0.564054	NA	-0.102786	NA	-0.0533684	NA	-0.0246045	NA	-0.164027	0.999778	0.0594878	NA	-0.0480727	0.999992	-0.174324	NA	-0.289977	0.999959
Armh3	0.0262776	0.971741	-0.177086	0.47138	-0.0869215	0.803014	-0.0388161	0.951037	-0.295625	0.0956099	-0.126792	0.676827	0.0797264	0.838933	-0.27284	0.564038	-0.740964	0.000140936	-0.0609245	0.826748	-0.353322	0.190763	-0.188043	0.641161	-0.0513552	0.999983	0.0849614	0.999778	-0.271715	0.356012	-0.0595685	0.999992	0.057823	0.999994	-0.126225	0.999959
Armh4	-0.06176	0.97476	0.897233	0.43614	-0.410637	0.654548	-1.12523	0.119091	-2.17153	0.0063899	0.45158	0.692443	0.00740737	0.999876	1.15286	0.500579	-0.38823	0.740881	-1.55906	0.174623	-1.3381	0.324331	-0.885172	0.782097	-0.0794947	0.999983	-0.16076	0.999778	0.386594	0.384818	-0.228702	0.999992	-0.350796	0.999994	-0.28009	0.999959
Armt1	0.0625751	0.941229	0.381361	0.0370204	-0.504062	0.0169713	0.0560386	0.901941	0.163764	0.364715	0.162601	0.559684	-0.140395	0.702722	-0.257901	0.59383	0.332036	0.145889	0.0119567	0.966434	0.304794	0.330308	0.241815	0.496046	0.00952583	0.999983	-0.0702354	0.999778	-0.0602058	0.910191	0.004074	0.999992	0.024544	0.999994	0.0324397	0.999959
Arnt	-0.185784	0.767367	-0.066325	0.893619	0.199044	0.57641	0.233666	0.514908	-0.442222	0.0411793	-0.28425	0.383984	0.443345	0.156178	-0.0266607	0.989467	0.379174	0.156521	0.37603	0.149672	-0.0350355	0.989889	0.0487154	0.979072	0.232964	0.999983	0.0981956	0.999778	0.125456	0.837742	0.192769	0.999992	0.0682199	0.999994	0.191527	0.999959
Arnt2	-0.46064	0.671184	-0.484538	0.375504	-1.28958	0.0126836	-1.18872	0.0147892	-0.553453	0.195953	-1.02344	0.0911549	0.375794	0.65498	0.743092	0.46057	0.807381	0.132226	1.08584	0.042251	-0.31903	0.794635	0.146414	0.947613	0.0325856	0.999983	-0.00944776	0.999778	-0.1879	0.868348	-0.155901	0.999992	0.227041	0.999994	0.0987787	0.999959
Arntl	0.798783	0.652548	-0.816043	0.397022	-1.11984	0.252056	0.397996	0.81315	0.914089	0.226231	-3.9736	1.38636e-08	0.626826	0.617898	-1.06851	0.581207	-0.651855	0.487199	0.483513	0.616223	0.586161	0.763649	-2.11852	0.0153424	0.143679	0.999983	-0.208949	0.999778	-0.360408	0.860527	-0.0701598	0.999992	0.167245	0.999994	-0.71459	0.999959
Arntl2	-0.455974	0.774137	-0.73465	0.271896	0.0887558	0.956195	-0.421388	0.676105	-0.23807	0.727767	-0.30057	0.76079	-1.03379	0.270388	-0.566311	0.840644	0.905225	0.261215	0.809876	0.293588	-0.0732353	0.992151	1.38415	0.0797907	0.0402905	0.999983	-0.420184	0.999778	0.0575399	0.996583	0.562449	0.999992	0.20661	0.999994	0.325773	0.999959
Arpc1a	-0.00819366	0.992323	-0.38657	0.209187	-0.128176	0.791085	-0.0891702	0.892849	-0.213635	0.456441	0.197828	0.636175	-0.546582	0.0986369	-0.0513441	0.989467	-0.525872	0.0666209	-0.954815	0.000247299	-0.499051	0.19673	-0.132585	0.899837	0.0455886	0.999983	-0.065155	0.999778	-0.00735991	0.996583	-0.0569275	0.999992	0.111271	0.999994	-0.00709488	0.999959
Arpc1b	0.61659	0.290676	0.771176	0.0301177	0.198836	0.737605	0.505777	0.275653	1.32605	8.70721e-06	0.573673	0.235225	-0.311047	0.574411	0.191054	0.963182	-0.611145	0.104906	-0.903829	0.0091746	-0.223281	0.82317	0.126432	0.928459	0.198069	0.999983	0.121621	0.999778	-0.180036	0.844902	0.396558	0.999992	0.17449	0.999994	-0.0410189	0.999959
Arpc2	0.341324	0.166635	0.548509	0.00033384	-0.428483	0.0267491	0.0272666	0.967527	0.482394	0.000844034	0.0094477	0.974727	-0.176366	0.471569	-0.0531343	0.989467	-0.352488	0.0428097	-0.434632	0.00818931	-0.107989	0.815108	0.169839	0.604981	0.0179924	0.999983	-0.144245	0.999778	0.452305	0.0199106	-0.0442759	0.999992	0.117235	0.999994	0.0737456	0.999959
Arpc3	0.442728	0.290676	0.50256	0.0555698	-0.422908	0.170453	0.0324337	0.983849	0.653357	0.00338587	0.332855	0.336491	-0.335435	0.334106	-0.100454	0.989467	-0.460583	0.0878784	-0.605897	0.0158363	-0.260915	0.630429	0.0844097	0.938669	-0.0646831	0.999983	-0.0434152	0.999778	0.0427105	0.977687	-0.091264	0.999992	0.0941574	0.999994	-0.180233	0.999959
Arpc4	0.230532	0.734896	0.155781	0.70079	-0.065042	0.910381	-0.0530184	0.952559	0.475479	0.0532361	0.357392	0.327343	-0.280476	0.478101	-0.10482	0.989467	-0.53509	0.0582113	-0.505664	0.0633172	-0.0839671	0.936321	0.198045	0.771706	-0.116067	0.999983	-0.04702	0.999778	-0.421936	0.278778	-0.162052	0.999992	0.0239423	0.999994	-0.0951408	0.999959
Arpc5	0.12685	0.81525	0.4643	0.0133675	-0.421688	0.0621537	0.161652	0.599004	0.253308	0.164995	0.133977	0.653936	-0.213941	0.438059	-0.133403	0.90968	-0.260992	0.222241	-0.336366	0.0885329	0.104201	0.861937	0.222816	0.516037	0.0844785	0.999983	-0.19777	0.999778	-0.168639	0.652737	0.171924	0.999992	0.109317	0.999994	0.0647345	0.999959
Arpc5l	0.0776113	0.962391	0.167245	0.701278	-0.447521	0.209172	-0.502853	0.155191	-0.0154547	0.965797	0.36679	0.352809	-0.652334	0.0583602	0.0490849	0.989467	-0.337267	0.308826	-0.757786	0.00874228	-0.0568105	0.973981	0.211435	0.776477	-0.117511	0.999983	0.0534955	0.999778	0.761205	0.022598	-0.0757572	0.999992	-0.0723349	0.999994	-0.21954	0.999959
Arpin	0.161616	0.874272	-0.150984	0.765591	-0.186796	0.719351	-0.0123958	0.99019	0.251441	0.442792	0.116633	0.846962	-0.24918	0.62209	0.596693	0.311573	-0.594038	0.0732626	-0.456186	0.165097	-0.0879857	0.946965	-0.0423434	0.996107	0.142115	0.999983	0.25157	0.999778	-0.216725	0.747103	0.229729	0.999992	-0.131947	0.999994	-0.354555	0.999959
Arpp19	-0.296186	0.309174	-0.0295735	0.927054	-0.351654	0.0886453	-0.325156	0.118388	-0.394749	0.0105291	-0.0509614	0.895173	-0.456846	0.0247543	-0.205948	0.685324	0.221614	0.264882	-0.149021	0.465605	0.0636648	0.922162	0.155502	0.688349	0.0891777	0.999983	-0.223215	0.999778	0.131221	0.700695	-0.105923	0.999992	0.0250237	0.999994	-0.109701	0.999959
Arpp21	-0.106925	0.971741	0.0800994	0.937862	0.872306	0.287054	-1.2953	0.0776895	0.0294746	0.966392	-1.45546	0.0651407	0.397908	0.679541	0.515719	0.771074	0.551587	0.368485	0.952216	0.118378	-1.22563	0.0414715	-0.0475138	0.996107	0.0614424	0.999983	-0.261219	0.999778	0.089222	0.966684	-0.020907	0.999992	0.185707	0.999994	0.0338313	0.999959
Arrb1	-0.357747	0.647491	-0.877577	0.00930264	-0.22212	0.693736	0.356334	0.490157	-0.99879	0.000924901	-0.392263	0.414575	0.435395	0.373684	0.452998	0.618455	-0.317372	0.448927	-0.03679	0.937189	-0.0226452	0.992151	-0.330849	0.652853	-0.0342404	0.999983	-0.0125249	0.999778	0.191026	0.817215	0.0659337	0.999992	0.0638977	0.999994	0.00719009	0.999959
Arrb2	0.309696	0.685232	0.334369	0.415326	-0.0656606	0.931693	0.0507308	0.970918	0.716303	0.0140141	0.0917066	0.901669	0.0371105	0.986036	-0.177179	0.963182	-0.435916	0.233945	-0.495264	0.147855	-0.353136	0.599324	0.0827138	0.961005	-0.11399	0.999983	0.00913468	0.999778	-0.0704627	0.960341	-0.030426	0.999992	-0.0582097	0.999994	0.161814	0.999959
Arrdc1	0.329157	0.70837	0.252389	0.626518	0.366474	0.470464	0.424851	0.406876	0.646393	0.0515901	0.28183	0.605451	-0.0391615	0.987828	0.472986	0.61456	-1.2307	0.000569994	-0.812291	0.0244938	0.461632	0.491077	0.825171	0.0613209	-0.0160467	0.999983	0.189909	0.999778	-0.391528	0.551109	0.188459	0.999992	0.207573	0.999994	0.0318797	0.999959
Arrdc2	0.812301	0.661466	-0.0715004	0.953821	0.658296	0.527568	0.962905	0.480296	1.41332	0.0138154	0.834178	0.497901	0.339608	0.877718	0.155094	0.989467	0.416866	0.714365	-0.372652	0.777053	-0.166471	0.9772	1.23052	0.385166	-0.26734	0.999983	-0.173293	0.999778	-0.058703	0.996583	-0.102608	0.999992	0.0707488	0.999994	-0.0537626	0.999959
Arrdc3	-0.524999	0.508313	-0.441651	0.371405	-0.214088	0.755619	0.205401	0.809712	-1.17041	0.00077928	0.0745936	0.930745	-0.46813	0.420512	-0.201158	0.96859	0.423505	0.374333	0.123693	0.83382	0.0936581	0.963017	0.0886427	0.97315	0.21916	0.999983	0.166383	0.999778	0.575656	0.340352	0.23213	0.999992	0.0355823	0.999994	0.591266	0.999959
Arrdc4	-0.230308	0.743217	0.259715	0.456688	-0.544328	0.0951476	-0.178051	0.720591	0.0898589	0.800016	-0.173011	0.691332	-0.322265	0.411438	-0.37237	0.58608	0.211919	0.540433	0.0935897	0.809622	-0.273304	0.650262	0.518552	0.153758	0.0290441	0.999983	0.127544	0.999778	-0.209949	0.713561	0.024827	0.999992	0.0947968	0.999994	-0.0433619	0.999959
Arrdc5	-1.37645	NA	0.497219	NA	2.3373	NA	-1.08905	NA	-0.652419	NA	-0.422816	NA	0.953336	NA	-0.71058	NA	-0.503724	NA	-0.564054	NA	-1.0878	NA	-1.8021	NA	-1.6379	NA	-0.164027	0.999778	0.0600582	NA	0.913653	0.999992	-0.174324	NA	-0.289977	0.999959
Arsa	0.201191	0.827708	-0.385753	0.301123	0.39075	0.346687	0.403757	0.349975	-0.362231	0.239144	0.273838	0.550763	0.0606254	0.94896	-0.0550599	0.989467	-1.09398	0.000451699	-0.527661	0.102985	-0.0556242	0.980574	-0.336502	0.574147	-0.103121	0.999983	0.0965715	0.999778	0.000397568	0.999724	0.0504157	0.999992	0.114809	0.999994	0.178972	0.999959
Arsb	0.302758	0.58472	0.636194	0.0136766	0.0760383	0.888712	0.147235	0.780705	0.489805	0.0408116	-0.288345	0.431475	0.108768	0.839338	-0.0489473	0.989467	0.408967	0.159232	0.877975	0.000887843	0.156409	0.842696	0.151126	0.862617	0.0025007	0.999983	-0.150807	0.999778	0.208018	0.680333	-0.0139273	0.999992	-0.0824416	0.999994	0.102708	0.999959
Arsg	-0.19423	0.956927	-0.753268	0.344498	-0.205266	0.878749	-0.0621556	0.99019	-1.12379	0.0637335	-0.0330274	0.977284	-0.0728492	0.9868	-0.422363	0.928145	-0.154636	0.882221	-0.248762	0.777053	-0.862167	0.463447	-1.65585	0.0294787	-0.00646803	0.999983	0.14495	0.999778	-0.320362	0.849791	-0.169437	0.999992	0.0886193	0.999994	-0.100895	0.999959
Arsh	2.21557	NA	-0.663363	NA	1.37268	NA	-0.127337	NA	2.28577	0.376033	0.241117	NA	-0.470419	NA	-2.22778	0.861323	0.19689	NA	-3.70844	NA	-0.31004	NA	0.417261	NA	-1.9937	0.999983	-0.202822	0.999778	1.96386	NA	1.89047	0.999992	2.22763	NA	2.07622	0.999959
Arsi	0.669759	0.54945	1.45152	0.00417855	0.750068	0.277809	0.573849	0.476837	3.1149	2.71955e-13	0.149991	0.90333	0.486178	0.629795	-0.309353	0.963182	0.0100294	0.991205	0.0208723	0.979579	-0.22807	0.914843	-0.507331	0.69742	0.275426	0.999983	0.0410867	0.999778	-1.0233	0.217736	0.473439	0.999992	0.665621	0.999994	-0.800103	0.999959
Arsj	-0.286245	0.848954	0.216388	0.784984	-0.301464	0.714615	-0.0403842	0.99019	-0.0302912	0.960927	-1.03474	0.118263	-0.524781	0.611928	0.993559	0.381887	0.59821	0.392469	-1.08282	0.0758171	-0.579634	0.62645	-1.82561	0.00665105	0.63287	0.999983	-0.296965	0.999778	1.43773	0.154954	0.359797	0.999992	0.564665	0.999994	-0.299633	0.999959
Arsk	-0.369637	0.671744	-0.206732	0.723271	0.105127	0.896999	-0.0568781	0.973412	-0.976018	0.00339853	-0.615715	0.235551	-0.115379	0.919012	0.00038498	0.999609	0.31147	0.58626	0.27755	0.630189	-0.267361	0.82317	-0.213337	0.899837	0.0733047	0.999983	-0.118481	0.999778	0.173017	0.865752	-0.116613	0.999992	0.19505	0.999994	0.29624	0.999959
Arsl	-0.0215236	0.99414	1.2285	0.173604	1.82445	0.0659188	0.327277	0.874219	1.00476	0.191095	0.966966	0.399145	0.253789	0.907421	-0.075277	0.989467	-0.375082	0.759261	0.642725	0.61736	-0.477957	0.860963	0.306256	0.932059	-0.370522	0.999983	-0.0152531	0.999778	-0.447121	0.885393	-1.25475	0.999992	0.606869	0.999994	-0.204744	0.999959
Art1	0.919824	0.768721	0.388157	0.859333	-0.228805	NA	0.521336	0.832052	1.1374	0.299099	-0.336972	0.897408	-0.00839079	NA	0.802197	0.989467	0.467772	NA	-1.19183	NA	-1.97227	NA	0.882661	NA	-0.202125	0.999983	-0.41627	0.999778	-5.41927	0.0106196	0.819663	0.999992	0.390148	0.999994	4.34507	0.835895
Art3	0.151406	0.932012	-0.0759739	0.922751	0.0366228	0.964039	0.25911	0.738917	0.25762	0.575076	-0.183464	0.807665	0.490099	0.44022	0.534158	0.637104	0.717705	0.117011	0.576567	0.218308	-1.28858	0.00666198	-0.209091	0.898118	-0.0764121	0.999983	-0.143438	0.999778	-0.683017	0.304095	0.351431	0.999992	0.0197747	0.999994	-0.473057	0.999959
Art4	0.926916	0.538371	0.117239	0.931994	-0.155068	0.930829	0.382438	0.808669	1.90439	0.00336865	0.16462	0.9304	-1.09925	0.664238	0.986639	0.869763	3.02804	0.11906	1.00884	NA	0.905864	0.882257	1.232	0.671345	0.507606	0.999983	-0.165138	0.999778	0.418351	0.83814	-0.62651	0.999992	0.0389871	0.999994	-0.159552	0.999959
Art5	2.07923	NA	-3.12999	NA	3.31971	NA	1.44049	NA	-0.295958	NA	-1.18289	NA	-0.00839072	NA	0.251162	NA	-0.503756	NA	-0.564091	NA	-0.102792	NA	-0.0533718	NA	-0.697719	NA	-0.251128	0.999778	-3.80182	NA	-1.00986	0.999992	-1.54084	NA	2.22477	0.999959
Artn	-0.870286	0.558892	1.57952	0.0210814	1.53042	0.129481	-1.17402	0.243466	1.5475	0.00241747	0.50107	0.69987	-1.04097	0.346323	0.52702	0.907913	-0.399483	0.702358	0.49797	0.649103	-0.0328466	0.992151	1.31184	0.389021	0.165555	0.999983	-0.0345981	0.999778	0.229225	0.8321	-0.122124	0.999992	0.146066	0.999994	0.0221207	0.999959
Arv1	0.0186686	0.980345	-0.231972	0.483964	-0.117735	0.794624	-0.405879	0.207919	-0.197512	0.458346	-0.0117456	0.979047	-0.347084	0.356219	0.287956	0.736482	-0.377165	0.215343	-0.435414	0.12971	-0.213987	0.733173	-0.214706	0.736237	0.239984	0.999983	0.235012	0.999778	0.361681	0.40269	-0.0244418	0.999992	-0.147998	0.999994	-0.278771	0.999959
Arvcf	0.968607	0.0488121	-0.365588	0.47226	-0.294423	0.626701	0.882832	0.0485665	-0.141716	0.776898	-0.478534	0.376478	0.0844496	0.956624	0.296264	0.917703	0.496402	0.339826	0.642848	0.208175	0.0573337	0.992151	0.187495	0.917002	-0.144314	0.999983	0.0404468	0.999778	-0.395694	0.568944	0.0712605	0.999992	0.191606	0.999994	-0.0370087	0.999959
Arx	-0.356651	0.971741	-0.564008	0.90176	-0.246097	0.960682	-0.127338	0.99019	0.309329	0.93298	-0.422847	0.930745	1.80733	0.419109	-0.638062	0.893238	1.32642	0.311846	2.23753	0.153141	0.149469	0.992151	-0.103105	0.996107	-0.161219	0.999983	0.11179	0.999778	0.0866822	0.95131	0.128198	0.999992	0.0722495	0.999994	0.126925	0.999959
As3mt	-0.345974	0.971482	-0.533525	0.832619	-0.835451	0.72246	-1.71443	0.388245	-0.234492	0.922136	1.67299	0.417993	-1.27106	0.551146	-0.778033	0.954669	-1.55092	0.326765	-1.21398	0.437148	-1.46558	0.606582	0.135524	0.996107	1.36566	0.999983	-0.491473	0.999778	-0.660115	0.858196	-1.29807	0.999992	-0.335644	0.999994	0.519943	0.999959
Asah1	-0.31595	0.715857	-0.106324	0.88082	-0.34535	0.487647	0.066544	0.957148	-1.07507	0.000416198	-0.0966687	0.904989	-0.376438	0.46501	0.158505	0.982211	-0.815403	0.0244549	-0.587067	0.106358	0.580203	0.282349	0.0948557	0.95702	0.162228	0.999983	-0.258043	0.999778	0.292969	0.663908	0.0577721	0.999992	-0.0202296	0.999994	-0.0355651	0.999959
Asah2	-0.161567	0.971741	-0.206762	0.919997	-0.662555	0.714801	-0.520862	0.826365	-0.457656	0.73253	0.0910834	0.962956	-1.19311	0.4463	-3.52403	0.00520143	1.83926	0.114596	0.13038	0.926506	-1.25254	0.564843	1.07175	0.624042	0.130304	0.999983	-0.00680498	0.999778	0.371007	0.90777	-0.17401	0.999992	-0.212988	0.999994	-0.0651848	0.999959
Asap1	-0.104283	0.955977	-0.0456278	0.941065	0.0831296	0.911681	0.336623	0.520658	-0.126791	0.772326	-0.405035	0.395443	0.569152	0.216214	-0.0663769	0.989467	0.00963697	0.984869	-0.05169	0.91217	0.0378465	0.992151	0.588914	0.236899	-0.0876677	0.999983	-0.100547	0.999778	0.390032	0.499246	-0.155389	0.999992	0.154514	0.999994	0.140728	0.999959
Asap2	-0.293931	0.58464	-0.390823	0.167238	0.129788	0.77004	0.0383857	0.973412	-0.501936	0.0300129	-0.492648	0.16157	0.270323	0.483257	0.136139	0.963877	-0.126647	0.720761	0.00420215	0.990316	0.288157	0.576887	-0.09749	0.924722	-0.108986	0.999983	-0.0454385	0.999778	0.193467	0.700064	0.0604705	0.999992	-0.0922908	0.999994	0.00240601	0.999959
Asap3	0.431008	0.414605	0.655727	0.0204222	0.558326	0.10791	0.729664	0.0192698	1.28129	4.8146e-08	0.0228694	0.965015	0.551529	0.199621	0.00185503	0.998605	0.442495	0.223555	0.579417	0.0864163	-0.0745223	0.960375	0.189576	0.849161	0.295596	0.999983	0.383924	0.999778	0.0969692	0.926089	-0.0740347	0.999992	-0.283239	0.999994	-0.453487	0.999959
Asb1	-0.577442	0.177727	0.0744268	0.900362	0.401793	0.341487	0.250302	0.581482	-0.0987772	0.779426	-0.272668	0.521446	-0.322959	0.608788	0.187933	0.959341	-0.288561	0.560662	0.557422	0.259953	-0.111563	0.928577	-0.193689	0.895392	0.063113	0.999983	0.1652	0.999778	0.0748545	0.937988	-0.172008	0.999992	0.231792	0.999994	0.193129	0.999959
Asb10	0.213086	0.95755	-1.41711	0.0530068	1.14621	0.194707	0.0981273	0.981062	-1.31445	0.0533042	1.30548	0.21099	0.478973	0.858765	1.01189	0.689869	-0.850664	0.448653	0.125571	NA	-1.14614	0.452076	0.314004	0.928305	-0.0126641	0.999983	0.236116	0.999778	-1.05901	0.386227	0.275477	0.999992	0.0983166	0.999994	0.314878	0.999959
Asb11	-0.59246	0.727665	-0.496591	0.602756	-0.250959	0.846428	-0.319131	0.828494	-1.00963	0.115003	-0.0417994	0.971788	-0.117735	0.978341	1.17448	0.572011	-1.27699	0.276431	0.478882	0.69172	-0.904481	0.599198	-1.23108	0.575914	-0.146132	0.999983	-0.154373	0.999778	-0.685686	0.640973	0.629879	0.999992	0.930255	0.999994	0.997339	0.999959
Asb12	1.86848	NA	-2.1405	NA	0.715696	NA	-0.328558	NA	-1.21315	NA	-1.44133	NA	1.75911	NA	1.80988	NA	-0.503759	NA	-2.93019	NA	-0.967806	NA	-1.93626	NA	-1.92943	0.999983	-0.164044	0.999778	-5.50246	NA	2.3599	0.999992	-0.174342	NA	1.06094	0.999959
Asb13	-0.206332	0.766655	0.0597787	0.904275	-0.0201462	0.969332	0.161274	0.746869	-0.451408	0.0621102	0.00232994	0.996188	0.0718596	0.913412	0.300951	0.717162	0.0411945	0.913223	-0.0538477	0.887734	0.112809	0.906778	-0.489888	0.18481	0.0598174	0.999983	0.0577262	0.999778	0.0177504	0.996583	-0.00260314	0.999992	-0.0177812	0.999994	-0.13602	0.999959
Asb14	0.440841	0.902952	-1.53321	0.155891	-0.0704858	0.970791	0.371372	0.866265	-0.889583	0.371959	0.82542	0.564203	0.759203	0.727069	-0.892738	0.871734	4.30699	0.0227073	3.35003	0.0790982	-1.25021	0.535487	-0.00495484	0.998337	-0.170978	0.999983	-0.35529	0.999778	0.338169	0.897746	-0.169613	0.999992	0.387008	0.999994	0.579411	0.999959
Asb15	0.429739	0.886289	-1.45968	0.121584	2.6189	NA	0.467678	0.851157	-2.18196	0.0207575	-2.33142	0.0411707	-1.49735	NA	2.62634	0.475261	1.94346	NA	-0.564095	NA	-0.275484	NA	-0.82163	0.882616	0.320774	0.999983	-0.396494	0.999778	-0.291776	0.895387	0.0357319	0.999992	0.437586	0.999994	-0.0746676	0.999959
Asb16	1.98219	NA	-1.55229	NA	2.33527	NA	-1.11385	NA	-0.477174	NA	-0.467736	NA	-0.00839078	NA	0.251163	NA	1.89275	NA	-0.564094	NA	-0.102793	NA	-2.43493	NA	-0.103874	0.999983	-0.192857	0.999778	0.449236	NA	-0.83769	0.999992	-0.558795	NA	2.25187	0.999959
Asb17	-0.356626	NA	0.397758	NA	-0.246079	NA	-0.127328	NA	0.309307	NA	-0.422816	NA	-0.00839018	NA	0.251146	NA	-0.503724	NA	-0.564054	NA	-0.102786	NA	-0.0533684	NA	-0.0246045	NA	-0.164027	0.999778	0.0586621	NA	-0.0480727	0.999992	-0.174324	NA	-0.289977	0.999959
Asb18	-0.816726	0.866313	-2.85634	0.215946	3.82037	NA	2.38931	0.310681	-3.79541	0.0283529	-1.2145	0.556688	-0.00839079	NA	-0.710631	0.989467	-1.46556	NA	0.3977	NA	-0.102793	NA	-0.0533722	0.996107	-0.224186	0.999983	0.321444	0.999778	-0.219152	0.960897	-0.240164	0.999992	-0.0319494	0.999994	-0.656151	0.999959
Asb2	0.715095	0.461962	0.993214	0.0447997	1.36775	0.0240969	0.968873	0.127475	2.1549	6.70629e-08	-0.4156	0.573238	-0.0165516	0.999876	-0.253963	0.963182	0.586423	0.273712	0.796293	0.110235	-0.593139	0.500579	0.215814	0.91134	-0.00320757	0.999983	0.0585681	0.999778	-0.505205	0.551109	-0.216972	0.999992	0.481121	0.999994	0.0804755	0.999959
Asb3	-0.297476	0.685959	-0.238745	0.58356	-0.37247	0.381111	-0.220459	0.68918	-0.682889	0.0155083	-0.13738	0.811577	-0.388941	0.408645	-0.399566	0.639311	-0.193106	0.650638	-0.362257	0.325451	-0.273309	0.710647	0.0302179	0.996107	0.174403	0.999983	-0.132225	0.999778	0.287081	0.621415	-0.0968493	0.999992	-0.160728	0.999994	-0.0747672	0.999959
Asb4	-0.610865	0.901262	-3.3045	0.116438	2.98306	0.235856	0.552042	0.847754	4.60372	0.00654858	-0.422847	0.930878	-1.57368	0.587174	1.75546	0.864371	-0.831373	0.695233	-1.23674	0.602886	-1.25856	0.670408	-0.117895	0.996107	0.796662	0.999983	1.21513	0.999778	2.01335	0.0860549	-0.319005	0.999992	1.56608	0.999994	0.953381	0.999959
Asb5	0.494408	0.860246	-1.8839	0.0515234	0.637157	0.699066	-1.08303	0.377503	-2.04021	0.0177685	-0.998772	0.460437	-0.319399	0.873373	0.344072	0.989467	0.549617	0.628738	-0.502492	0.663815	-1.74149	0.14716	-0.532849	0.841174	-0.334741	0.999983	-0.031008	0.999778	-0.355785	0.880061	-0.0440073	0.999992	-0.494806	0.999994	-0.586187	0.999959
Asb6	0.217505	0.787911	0.0285972	0.955628	0.813289	0.0159507	0.466924	0.215987	0.330058	0.241087	0.484563	0.227198	0.049445	0.963194	0.0992649	0.989467	-0.178556	0.651376	-0.098092	0.818004	0.183327	0.831906	0.0402501	0.996107	-0.241465	0.999983	0.203076	0.999778	-0.473244	0.250193	0.110445	0.999992	0.0314368	0.999994	-0.0353448	0.999959
Asb7	-0.306104	0.431009	-0.17349	0.537033	-0.0619123	0.888071	0.0164859	0.99019	-0.446098	0.0169914	-0.266263	0.358009	0.157265	0.680551	-0.0554387	0.989467	0.0779377	0.813886	0.190666	0.465021	0.0792635	0.921084	-0.164004	0.764533	0.0888447	0.999983	-0.147282	0.999778	0.105794	0.841017	-0.0328777	0.999992	-0.22861	0.999994	0.197116	0.999959
Asb8	0.0131603	0.979692	-0.274868	0.149868	-0.309032	0.14239	-0.253593	0.264425	-0.311828	0.0507212	0.176547	0.475569	-0.0970491	0.773601	0.0434635	0.989467	-0.527076	0.00317348	-0.413843	0.0207682	0.0331742	0.976356	-0.21805	0.479986	0.0653547	0.999983	1.64433e-05	0.99996	-0.20612	0.469202	-0.057051	0.999992	0.00858488	0.999994	0.11184	0.999959
Asb9	-0.356626	NA	-0.563968	NA	-0.246079	NA	-0.127328	NA	0.309307	NA	-0.422816	NA	-0.00839018	NA	0.251146	NA	-0.503724	NA	-0.564054	NA	-0.102786	NA	-0.0533684	NA	-0.0246045	NA	-0.164027	0.999778	-0.902437	NA	1.4374	0.999992	-1.50508	NA	0.671749	0.999959
Ascc1	0.182113	0.789659	0.0154132	0.972635	-0.134119	0.752114	-0.155063	0.740642	0.240338	0.335004	0.180874	0.639653	0.0183223	0.999876	0.0204425	0.989467	-0.334765	0.240959	-0.374357	0.165326	0.0289503	0.992151	-0.14486	0.861814	0.058053	0.999983	0.096662	0.999778	-0.083743	0.91289	-0.101644	0.999992	0.124957	0.999994	-0.0202997	0.999959
Ascc2	0.0439814	0.958953	0.0977599	0.658226	0.270168	0.14529	0.205338	0.320981	0.308474	0.0232919	-0.0205552	0.941411	0.111189	0.684616	-0.149288	0.806466	0.0295655	0.895155	0.220253	0.203306	-0.0236331	0.987714	-0.215328	0.405032	-0.0742097	0.999983	-0.0519109	0.999778	0.188898	0.497873	0.0908998	0.999992	-0.0206939	0.999994	0.0668525	0.999959
Ascc3	-0.50471	0.311867	0.160779	0.724722	0.146751	0.776442	-0.0691792	0.93602	-0.343684	0.233808	-0.46675	0.248115	0.230947	0.637748	-0.215975	0.89687	0.337343	0.32506	0.37999	0.241391	0.0337117	0.992151	-0.0509086	0.987149	0.0559975	0.999983	0.0077666	0.999778	0.0976508	0.912351	-0.054941	0.999992	-0.0080796	0.999994	-0.0729847	0.999959
Ascl1	-0.547973	0.752135	-1.35101	0.0759736	-0.206488	0.863342	0.303658	0.822894	-1.05628	0.101804	-0.53484	0.566365	0.48258	0.835445	1.26126	0.511413	-0.206815	0.882221	0.468843	0.692442	-0.10653	0.992151	-1.66474	0.453684	0.0702663	0.999983	-0.0964127	0.999778	0.200291	0.754767	-0.0522396	0.999992	0.164812	0.999994	-0.518529	0.999959
Ascl2	0.290814	0.861684	0.0416709	0.964471	0.0152091	0.986235	0.154492	0.912139	0.56711	0.263895	0.384661	0.640076	-0.854956	0.236559	-0.561906	0.733409	0.343825	0.619151	0.656928	0.247307	0.43458	0.725199	0.342589	0.806762	-0.131694	0.999983	-0.347236	0.999778	-0.22912	0.888108	0.219127	0.999992	0.32132	0.999994	-0.324829	0.999959
Ascl3	-0.0823173	0.971741	-0.585415	0.392678	0.903113	0.211858	1.16366	0.0766896	-0.726615	0.15528	0.625009	0.423071	-0.410758	0.862763	0.752256	0.904819	-0.473844	0.804144	-1.99751	NA	-1.00047	0.65346	1.28358	0.521533	-0.216768	0.999983	-1.17001	0.999778	0.147932	0.9486	-0.138731	0.999992	0.157294	0.999994	-1.01718	0.999959
Ascl4	-2.19441	NA	1.27818	NA	2.5317	NA	-0.127337	NA	0.309328	NA	-1.38464	NA	0.0242714	NA	0.251163	NA	-1.46555	NA	0.397699	NA	-0.102793	NA	-1.01516	NA	0.553581	0.999983	1.27718	0.999778	1.67565	NA	1.04266	0.999992	-2.31152	NA	-0.35547	0.999959
Ascl5	-1.36153	NA	1.32848	NA	-1.20789	NA	-1.08913	NA	0.309327	NA	-0.422844	NA	-0.00839075	NA	0.251162	0.989467	-0.503757	NA	-0.564092	NA	-0.102792	NA	-0.0533719	NA	0.0996814	0.999983	0.297972	0.999778	-4.64681	NA	-0.148991	0.999992	-0.411295	NA	1.70681	0.999959
Asdurf	-0.0634261	0.977175	0.562459	0.532692	0.3393	0.775069	0.0855226	0.985147	-0.335201	0.653579	-0.252639	0.844956	-0.276903	0.856313	0.935943	0.576941	-0.905976	0.262434	-0.215424	0.855774	1.66556	0.0510327	-0.210778	0.949339	-0.0729001	0.999983	-0.0818137	0.999778	0.310258	0.857437	-0.119105	0.999992	-0.391547	0.999994	1.02554	0.999959
Asf1a	0.00211412	0.997843	-0.0700643	0.888385	-0.529966	0.0652606	-0.182128	0.657007	-0.208286	0.403371	0.147627	0.707558	-0.518745	0.100692	-0.153442	0.940277	0.343978	0.231664	-0.165269	0.604177	0.0385477	0.987366	-0.0748634	0.95054	-0.0365256	0.999983	-0.0749726	0.999778	-0.561591	0.0754818	-0.065689	0.999992	-0.116894	0.999994	-0.235666	0.999959
Asf1b	0.174068	0.921728	1.76104	6.11966e-06	0.483293	0.43841	0.334441	0.669111	3.38354	1.04161e-21	0.643484	0.303325	-0.273449	0.728988	-0.224483	0.965739	0.392225	0.455442	0.91701	0.039259	0.546406	0.50819	0.0348202	0.996107	0.297028	0.999983	-0.389909	0.999778	-0.596255	0.695282	0.465871	0.999992	0.27009	0.999994	-0.631702	0.999959
Asgr1	-0.356651	0.971741	0.397787	0.934212	-0.246097	NA	-0.127338	0.99019	0.309329	0.936747	1.4105	0.732563	-1.22731	NA	2.78972	0.506003	-3.65791	NA	-1.09387	NA	0.460529	NA	-0.571853	NA	-0.138086	0.999983	0.62156	0.999778	-3.04374	0.139236	-0.597749	0.999992	-0.966204	0.999994	0.190814	0.999959
Ash1l	-0.610034	0.47843	-0.165475	0.835526	0.340223	0.618718	0.235934	0.799273	-0.584144	0.172022	-0.737615	0.226428	0.741006	0.20453	0.0347754	0.989467	0.609489	0.22198	1.22689	0.00581989	0.0874849	0.974107	-0.180862	0.920284	0.125559	0.999983	-0.155893	0.999778	0.308147	0.739332	-0.101807	0.999992	0.0458729	0.999994	0.0551715	0.999959
Ash2l	-0.016005	0.971741	0.114555	0.457803	-0.0915309	0.626128	-0.0907293	0.661068	0.149307	0.19598	0.0852918	0.655844	-0.0520561	0.844921	-0.105091	0.857846	-0.0106018	0.953557	0.0564509	0.750941	0.012925	0.992151	0.0350954	0.955257	4.69354e-05	0.999983	0.0194132	0.999778	-0.0457487	0.897584	-0.0946461	0.999992	0.00538888	0.999994	-0.0944364	0.999959
Asic1	0.329282	0.875342	0.116724	0.923575	-0.175367	0.904486	-0.380008	0.754141	0.183474	0.818941	0.781115	0.351903	-1.81698	0.0216435	-0.140191	0.989467	1.03893	0.119097	0.112854	0.896362	-1.1411	0.179101	0.672476	0.52817	0.00465761	0.999983	0.0212423	0.999778	0.0453081	0.996583	-0.0788861	0.999992	0.0612465	0.999994	0.0327248	0.999959
Asic2	-0.440776	0.828052	-1.20759	0.0794455	-0.552765	0.581083	-2.20424	0.000402962	-1.05303	0.151594	0.487729	0.648001	0.480414	0.8079	0.33727	0.972047	0.717392	0.431817	-0.152671	0.907182	-1.16806	0.324559	-0.418398	0.871753	-0.107513	0.999983	0.0269892	0.999778	-0.0426934	0.996583	-0.121783	0.999992	0.00582129	0.999994	-0.132314	0.999959
Asic3	-0.35665	NA	-0.564007	0.933546	-1.20789	NA	-0.127337	NA	0.309328	0.952204	-0.422846	NA	-0.00839077	NA	1.21296	0.989467	-0.503759	NA	-0.564094	NA	-0.102793	NA	0.908421	NA	-0.192638	0.999983	1.20971	0.999778	-0.400086	NA	0.187833	0.999992	0.334625	NA	-0.98401	0.999959
Asic4	-0.356651	0.971741	0.331921	0.932061	-0.246097	0.960682	1.70731	0.618681	-1.49292	0.347606	2.06291	0.3999	-0.00839079	0.999876	0.58646	0.983834	0.965409	0.71389	-0.161852	0.934818	-2.19051	0.146988	-0.33125	0.954835	0.012796	0.999983	0.297162	0.999778	-0.37177	0.437115	0.153181	0.999992	0.124411	0.999994	-0.0596039	0.999959
Asic5	-0.909492	0.894178	-3.33302	0.129212	0.731146	0.769915	0.400946	0.949714	-2.10701	0.316202	3.45875	0.185839	1.06651	0.402013	-0.152161	0.989467	1.45114	0.137258	-0.367531	NA	-0.191366	0.965602	0.503473	0.85877	0.937189	0.999983	2.27985	0.999778	0.0586386	0.996583	-0.0480762	0.999992	-0.174343	0.999994	-0.289998	0.999959
Asl	-0.0973117	0.949905	-0.135347	0.786309	0.456576	0.235041	0.24856	0.620877	-0.192089	0.562145	0.383393	0.358627	0.298247	0.520318	0.424647	0.570804	-0.673858	0.033674	-0.129377	0.746903	0.142132	0.891529	-0.361966	0.497926	0.0112463	0.999983	0.0760452	0.999778	-0.165476	0.823254	-0.0634552	0.999992	0.300047	0.999994	-0.136263	0.999959
Asmt	-0.316528	NA	-1.62235	0.479633	1.13481	NA	1.16669	0.727504	-1.1437	0.482767	2.79756	NA	1.71633	NA	-1.35257	0.889321	-0.517878	NA	0.23596	NA	-2.05822	NA	-1.14259	NA	-0.0412793	0.999983	-0.885875	0.999778	-3.12319	0.381723	0.524191	0.999992	0.531891	0.999994	-0.289998	0.999959
Asns	-0.201163	0.917574	0.912177	0.0836867	0.342941	0.666017	-0.218769	0.843594	1.54319	0.000322372	0.124441	0.920068	0.496016	0.509909	-0.299706	0.944694	-0.266258	0.692477	0.323581	0.601047	1.10311	0.0865746	0.7346	0.338272	0.0333797	0.999983	0.00808508	0.999778	0.154394	0.919108	-0.140081	0.999992	0.130119	0.999994	-0.0380574	0.999959
Asnsd1	-0.148694	0.925686	-0.200842	0.742634	-0.133676	0.863342	-0.0575934	0.974247	-0.0657416	0.919288	0.373964	0.499449	-0.269164	0.688437	0.716738	0.34555	-0.821891	0.0451036	-0.408421	0.351123	0.607559	0.327112	0.0693787	0.984957	-0.0580186	0.999983	0.127838	0.999778	-0.325083	0.661353	0.0377533	0.999992	-0.0831199	0.999994	-0.00225814	0.999959
Aspa	-0.341871	0.858203	-0.799711	0.27371	0.583989	0.52833	-0.946881	0.21911	-1.42592	0.0139509	-0.0598117	0.958697	-0.0542641	0.993492	-0.0894795	0.989467	-0.624788	0.353474	-0.815838	0.182574	-0.38526	0.805386	-1.14138	0.133987	0.173863	0.999983	-0.122163	0.999778	-0.338188	0.799288	-0.0248385	0.999992	-0.404105	0.999994	0.234399	0.999959
Aspdh	-0.826541	0.72725	0.641067	0.558545	-0.38229	0.811324	0.225349	0.940523	1.46305	0.0332232	-0.348414	0.841993	0.299484	0.820205	0.407481	0.933946	-1.43439	0.0342167	-1.17167	0.0772821	-1.17098	0.206427	-1.69728	0.0235856	-0.074531	0.999983	0.00341025	0.999778	-0.388823	0.799474	0.0913124	0.999992	-0.327111	0.999994	-0.38566	0.999959
Aspg	0.484027	0.856732	-0.0923213	0.951454	0.837054	0.49472	1.29419	0.249451	-0.0749396	0.951164	0.11386	0.942284	-2.96045	0.0134146	1.71735	0.45464	-1.10434	0.449812	-1.20402	0.247954	1.49778	0.481173	3.55721	0.0879169	0.0319968	0.999983	0.217671	0.999778	-0.486939	0.811925	0.166323	0.999992	0.205297	0.999994	-0.133257	0.999959
Asph	-0.306502	0.727665	-0.264483	0.588298	-0.0464776	0.960682	-0.0112374	0.99019	-0.674674	0.034393	-0.60354	0.209868	-0.209022	0.752102	0.0742073	0.989467	0.610065	0.116296	0.877062	0.0154222	0.106645	0.940826	0.0171221	0.996107	-0.150752	0.999983	-0.160063	0.999778	-0.118573	0.906863	-0.073423	0.999992	-0.4633	0.999994	-0.16214	0.999959
Asphd1	-0.109514	0.971741	-0.705752	0.440321	0.479509	0.660213	-0.539287	0.753346	-0.297624	0.67896	0.0344806	0.980926	-2.20087	0.386115	0.919676	0.810263	0.826778	0.707423	1.76159	0.284952	-0.7564	0.750275	-0.0691763	0.996107	-0.0626654	0.999983	0.108491	0.999778	-0.489571	0.255288	-0.225905	0.999992	0.0939794	0.999994	-0.26543	0.999959
Asphd2	-0.317305	0.971741	-0.564008	0.90176	-0.246097	0.960682	-0.127338	0.99019	-1.53329	0.491903	-0.422847	0.930745	0.953405	0.835364	1.85361	0.689566	0.0902566	0.972029	-0.986299	0.580051	-2.95851	0.3068	2.36069	0.483047	-0.22762	0.999983	-0.00354536	0.999778	-0.314608	0.362038	-0.0164168	0.999992	0.171353	0.999994	-0.019624	0.999959
Aspm	0.0139227	0.993316	1.05302	0.0335953	0.240753	0.790797	-0.0386625	0.99019	2.20106	8.45124e-08	0.00418079	0.996404	0.495732	0.514956	-0.218598	0.98274	0.811233	0.131046	1.03564	0.0438432	0.409842	0.724152	-0.353295	0.780095	-0.130563	0.999983	-0.254628	0.999778	0.59243	0.544948	-0.355985	0.999992	-0.163033	0.999994	-0.776664	0.999959
Aspn	-0.870566	0.162426	-0.547279	0.269242	0.0805371	0.937799	-0.702523	0.185574	-2.00837	1.03653e-08	-0.374866	0.542428	-0.83608	0.135113	0.287681	0.921193	1.12646	0.0111071	-0.38326	0.452151	-1.20998	0.0147797	-0.125349	0.951212	0.721438	0.999983	-0.124009	0.999778	0.104862	0.954984	0.338256	0.999992	-0.322034	0.999994	0.220479	0.999959
Asprv1	0.622673	0.878381	-0.952095	0.574513	0.107275	0.963901	1.50976	0.620052	0.984768	0.432499	-0.443478	0.854819	0.0292226	0.999876	-2.07912	0.276514	-0.0527519	0.972534	0.0938167	0.945873	0.613629	0.838525	-0.427263	0.925128	0.0639133	0.999983	-0.227646	0.999778	-1.02685	0.569113	0.168611	0.999992	-0.15722	0.999994	-0.546494	0.999959
Aspscr1	0.341805	0.547883	-0.0518842	0.921765	0.213797	0.616637	-0.0201328	0.99019	0.358058	0.180118	0.368512	0.332767	-0.147444	0.785148	0.193101	0.913011	-0.478877	0.114443	-0.463978	0.11039	-0.2261	0.734102	-0.0922093	0.939752	-0.0605066	0.999983	0.180102	0.999778	-0.508733	0.182474	-0.12256	0.999992	0.0467734	0.999994	0.217141	0.999959
Asrgl1	1.11626	0.781557	3.34319	0.058637	1.89727	NA	-3.00045	0.276806	2.43423	0.0442071	1.21092	0.68862	2.45869	NA	-1.77045	0.801832	-1.01971	NA	-0.564095	NA	2.94895	NA	3.457	0.194967	0.360908	0.999983	0.528545	0.999778	-0.73621	0.744883	0.107021	0.999992	0.464145	0.999994	0.767363	0.999959
Ass1	-0.12267	0.971389	-0.625373	0.319399	0.725823	0.278888	-0.120373	0.938309	-0.682169	0.175321	0.451463	0.555567	-0.358105	0.702099	0.759846	0.574639	-0.0134279	0.986763	-1.62272	0.00179674	0.0314838	0.992151	0.85538	0.293805	0.109537	0.999983	0.759821	0.999778	0.333404	0.772831	0.00381056	0.999992	0.456764	0.999994	0.444202	0.999959
Aste1	-0.0799158	0.94159	0.137852	0.696313	0.194327	0.588055	-0.0971453	0.857026	-0.30529	0.171214	0.128466	0.746308	-0.112411	0.814369	0.00556015	0.994021	-0.276802	0.32318	-0.328822	0.205424	-0.270289	0.564843	-0.175761	0.776346	-0.0989489	0.999983	0.0698001	0.999778	0.0377199	0.984521	0.206259	0.999992	0.12995	0.999994	0.207708	0.999959
Astl	4.08896	0.0848116	3.25004	0.0105677	1.30169	NA	0.471213	0.843284	3.83758	0.000240546	1.32759	0.463822	-1.78329	NA	2.16225	0.740359	1.93919	NA	1.6862	NA	-1.06459	NA	1.76135	0.738808	0.470633	0.999983	-0.512658	0.999778	0.362269	0.885545	0.376346	0.999992	1.31284	0.999994	0.787603	0.999959
Astn1	-0.0423888	0.984371	0.642692	0.541459	-0.00131786	0.999544	-0.820304	0.402005	-1.51699	0.057002	-1.2437	0.258425	1.05472	0.313532	1.13225	0.147586	0.556623	0.386112	0.867123	0.217939	-0.900785	0.174681	-1.22746	0.0654243	0.225168	0.999983	-0.123178	0.999778	-0.00487721	0.996725	-0.0890171	0.999992	0.259131	0.999994	-0.00345835	0.999959
Astn2	0.0944517	0.962944	-0.579355	0.132592	0.730276	0.0892119	0.0205177	0.99019	-1.15283	0.000156003	0.623999	0.202465	-0.836944	0.65422	0.5251	0.905837	0.99401	0.264029	-0.133059	0.896427	-0.188163	0.951777	-1.04025	0.404232	-0.107691	0.999983	0.141338	0.999778	-0.172523	0.84465	-0.16358	0.999992	-0.0113208	0.999994	0.0306553	0.999959
Asxl1	0.0130044	0.987215	0.207965	0.569459	0.0879721	0.871414	0.250288	0.539649	0.157923	0.595018	-0.25439	0.502507	0.42888	0.251733	-0.242606	0.834557	0.738174	0.00795925	0.802222	0.00386582	0.183957	0.799613	-0.207437	0.757136	0.135481	0.999983	-0.0115853	0.999778	0.0743509	0.935764	-0.0722165	0.999992	0.144793	0.999994	0.0731775	0.999959
Asxl2	-0.374643	0.614291	0.485181	0.21253	0.398435	0.394058	0.0535993	0.970739	-0.25443	0.48724	-0.453564	0.334364	-0.10983	0.88923	0.0708129	0.989467	0.602742	0.110835	0.680987	0.0625585	0.0679222	0.974044	-0.11073	0.942546	0.161092	0.999983	-0.242404	0.999778	0.400966	0.482823	-0.00207348	0.999992	0.0655652	0.999994	0.199091	0.999959
Asxl3	0.0230447	0.991347	0.0389623	0.974145	0.169159	0.921889	0.549627	0.663515	0.00147646	0.998362	-1.78842	0.0365071	-0.985999	0.693646	-0.213805	0.989467	0.480694	0.824846	0.0383117	0.987479	0.13589	0.989527	-1.41506	0.530456	0.569488	0.999983	-0.114892	0.999778	0.241105	0.856139	-0.197175	0.999992	0.400321	0.999994	0.00489002	0.999959
Asz1	0.674406	0.874892	-1.17854	0.529886	-2.12558	NA	-0.484554	0.873985	-0.83047	0.591024	1.58071	0.458291	-0.738822	NA	-0.191087	0.989467	-0.199171	NA	-1.37412	NA	0.235165	NA	-0.237984	NA	1.71953	0.999983	-0.695684	0.999778	-3.12046	0.330794	0.00470159	0.999992	0.950374	0.999994	0.740356	0.999959
Atad1	-0.122074	0.839333	0.13388	0.648044	-0.349656	0.155514	-0.158011	0.637918	-0.255706	0.187864	0.0322361	0.93268	-0.12225	0.739675	-0.181105	0.834399	-0.0129615	0.964679	0.0707036	0.801849	0.364066	0.210962	0.138661	0.801333	0.0614534	0.999983	-0.203052	0.999778	-0.320389	0.269227	-0.0463845	0.999992	-0.113321	0.999994	-0.0743228	0.999959
Atad2	-0.395471	0.629122	0.702253	0.0700886	0.455601	0.358538	0.0551528	0.974247	0.559405	0.108241	-0.000218754	0.999598	0.138468	0.860568	-0.0509429	0.989467	0.962534	0.0119251	1.28777	0.000570739	0.184979	0.884069	-0.0581782	0.991271	0.250572	0.999983	-0.362693	0.999778	0.536947	0.373296	0.329909	0.999992	-0.115858	0.999994	0.150303	0.999959
Atad2b	-0.276087	0.787437	0.364753	0.442713	0.207439	0.745223	0.0544302	0.975299	-0.414741	0.260218	-0.61663	0.227533	0.365565	0.528912	-0.109123	0.989467	0.610614	0.136451	0.56138	0.16574	0.188915	0.880789	0.0432316	0.996107	0.131368	0.999983	-0.00705935	0.999778	0.445733	0.469972	-0.0176447	0.999992	0.0411569	0.999994	-0.1458	0.999959
Atad5	-0.0319993	0.980345	1.28878	0.00202419	0.667692	0.255735	-0.175763	0.865023	0.89946	0.0244816	0.0100657	0.989501	-0.123166	0.912205	0.0213948	0.989467	1.3319	0.0037865	1.0331	0.0315968	0.365208	0.731076	0.269419	0.846238	0.18384	0.999983	0.150533	0.999778	0.806258	0.205708	0.479773	0.999992	-0.304351	0.999994	0.206144	0.999959
Atat1	-0.0508773	0.971741	-0.041541	0.941553	0.289986	0.555439	0.528016	0.229276	0.644469	0.0183495	-0.0654325	0.930745	0.00756967	0.999876	-0.124364	0.989467	-0.413892	0.367443	0.0568937	0.913386	-0.584208	0.297051	-0.0264112	0.996107	-0.0962787	0.999983	-0.144385	0.999778	0.268855	0.616881	-0.0728279	0.999992	0.084475	0.999994	0.173562	0.999959
Atcay	-0.0525084	0.971741	0.00148995	0.997544	0.460846	0.399031	1.08579	0.0111295	0.352086	0.284774	0.267111	0.664539	-0.0625768	0.98021	0.0894702	0.989467	0.745928	0.0726607	0.521732	0.269506	-0.603831	0.15118	-0.443386	0.47106	-0.170903	0.999983	0.0137865	0.999778	-0.125331	0.743852	-0.0173866	0.999992	0.106256	0.999994	0.0268409	0.999959
Ate1	-0.339499	0.396811	-0.0395059	0.92452	-0.0951529	0.817243	-0.268651	0.387635	-0.4743	0.0169848	-0.387738	0.202209	0.172737	0.655192	-0.184408	0.866294	0.259061	0.333397	-0.0554001	0.860238	-0.134487	0.839733	-0.189737	0.719524	0.179648	0.999983	-0.0985353	0.999778	0.0484509	0.958931	-0.00969888	0.999992	0.0387248	0.999994	0.00183883	0.999959
Atf1	-0.0692913	0.931308	0.203951	0.383082	-0.285461	0.231657	-0.0823809	0.845353	-0.133412	0.509808	-0.160502	0.564958	-0.211589	0.477838	0.0524696	0.989467	0.130626	0.613145	-0.0655949	0.819898	0.207697	0.607556	0.176459	0.689177	0.046146	0.999983	-0.242012	0.999778	0.048754	0.950056	0.0307432	0.999992	-0.0705214	0.999994	-0.245738	0.999959
Atf2	-0.339537	0.448879	0.0776003	0.864716	0.051038	0.926164	-0.169459	0.682861	-0.50605	0.0182262	-0.201834	0.564958	-0.0805875	0.877006	-0.12259	0.965739	0.191603	0.520134	0.240692	0.381385	0.0784853	0.931213	-0.183778	0.756728	0.148688	0.999983	-0.175539	0.999778	0.133178	0.811035	-0.0642966	0.999992	0.000245108	0.999994	0.063388	0.999959
Atf3	1.07614	0.391713	0.313758	0.784415	-0.370799	0.756799	-0.103764	0.973837	0.724681	0.296763	-0.221587	0.881132	0.0559707	0.999876	0.765316	0.735033	-1.3064	0.0801603	-1.19716	0.0940079	-0.469249	0.802891	1.30052	0.165542	0.392422	0.999983	0.782135	0.999778	-0.286329	0.901238	1.13531	0.999992	-0.123833	0.999994	-0.0482414	0.999959
Atf4	0.321727	0.542627	0.457669	0.100656	-0.105145	0.828335	-0.117952	0.837878	0.812522	0.000297873	0.477555	0.185166	0.0440132	0.96029	0.241468	0.820662	-0.0846019	0.829985	-0.150441	0.640477	0.00657147	0.994354	0.527289	0.119891	-0.226722	0.999983	0.303534	0.999778	-0.183041	0.735142	0.0846678	0.999992	0.28749	0.999994	0.272815	0.999959
Atf5	0.256019	0.806399	0.203969	0.719879	0.484476	0.31037	-0.460016	0.370218	1.26026	5.70128e-05	0.510876	0.310571	0.241127	0.735648	-0.0770045	0.989467	-0.0860806	0.882375	-0.0344184	0.948566	0.0531754	0.991982	-0.423412	0.566326	-0.119276	0.999983	-0.325537	0.999778	-0.123698	0.911672	0.323784	0.999992	-0.496598	0.999994	-0.0685139	0.999959
Atf6	-0.218756	0.772998	0.342223	0.310289	0.212857	0.631812	0.273387	0.526869	0.13836	0.67645	-0.345489	0.376377	0.219981	0.641761	-0.153971	0.963182	0.0171276	0.966726	0.42374	0.165191	0.0152113	0.992151	0.0277272	0.996107	0.0705484	0.999983	-0.143198	0.999778	0.169117	0.795286	-0.075819	0.999992	0.176183	0.999994	0.00714678	0.999959
Atf6b	0.234222	0.772133	-0.0449602	0.934719	0.505922	0.169137	0.636962	0.0708895	0.255448	0.413658	0.378688	0.359527	0.000467005	0.999876	-0.0381819	0.989467	-0.10119	0.824846	0.261256	0.453099	0.239798	0.743516	-0.00847099	0.996107	-0.174889	0.999983	-0.0230233	0.999778	-0.316824	0.547073	0.124648	0.999992	0.120084	0.999994	-0.053549	0.999959
Atf7ip2	0.000328833	0.999729	0.933496	0.334855	0.116862	0.960682	-0.417583	0.828513	-0.266754	0.797384	1.89587	0.197548	-1.77906	0.288952	-1.89072	0.289609	0.213292	0.882221	-0.982347	NA	0.0855321	0.992151	2.32671	0.0396025	0.0654086	0.999983	0.182171	0.999778	0.260906	0.894521	0.360979	0.999992	1.20386	0.999994	0.472455	0.999959
Atg10	-0.167384	0.847999	-0.400361	0.215168	-0.555949	0.100634	-0.276925	0.51835	-0.401486	0.130883	0.07555	0.910354	0.084056	0.915189	0.196659	0.926626	0.0966271	0.844073	-0.5892	0.0735024	-0.0810369	0.95074	0.0760514	0.965553	-0.0567201	0.999983	0.0407443	0.999778	-0.309065	0.521153	0.0469168	0.999992	0.102312	0.999994	0.0405263	0.999959
Atg101	0.273634	0.792655	-0.381426	0.420009	0.466255	0.345481	0.384354	0.494359	0.32107	0.405224	0.913279	0.064688	-0.10007	0.911627	0.370407	0.792297	-0.534194	0.202566	-0.624431	0.109504	-0.139375	0.921084	-0.0346939	0.996107	-0.157848	0.999983	0.165361	0.999778	-0.46393	0.446577	-0.0429888	0.999992	0.0570383	0.999994	0.0171431	0.999959
Atg12	0.0745556	0.912095	-0.105805	0.693973	-0.371488	0.0798812	-0.153044	0.591383	-0.204189	0.24137	0.242773	0.320043	-0.321401	0.174451	0.00702363	0.989799	-0.0558682	0.844015	-0.674491	0.00018017	-0.256991	0.41048	0.0997145	0.875967	0.115236	0.999983	0.00250178	0.999778	0.276621	0.287273	0.0074113	0.999992	-0.0380318	0.999994	-0.0360798	0.999959
Atg13	-0.0848792	0.951956	-0.755997	0.00345972	-0.067174	0.907967	0.118473	0.845253	-0.769279	0.00115955	0.100991	0.846962	0.225082	0.607276	0.0273272	0.989467	-0.853467	0.00179401	-0.558232	0.0424541	-0.252858	0.680886	-0.271586	0.618919	-0.0816007	0.999983	-0.0221183	0.999778	-0.157031	0.801305	-0.0237506	0.999992	0.0403341	0.999994	0.154409	0.999959
Atg14	-0.228633	0.657748	-0.693426	0.00102384	-0.0948724	0.823273	0.0492063	0.944652	-0.784243	5.01023e-05	0.115724	0.768414	0.0481768	0.947297	0.232048	0.785208	0.206243	0.50224	-0.437291	0.0868109	-0.209558	0.688566	0.0366028	0.992391	-0.0374298	0.999983	0.0377099	0.999778	-0.0171459	0.996583	0.0633537	0.999992	-0.00243239	0.999994	0.341034	0.999959
Atg16l1	-0.112873	0.816171	-0.211771	0.292787	0.0641749	0.846967	0.0613446	0.880974	-0.243942	0.126803	0.0591854	0.863979	0.12876	0.658052	-0.249559	0.542924	-0.286829	0.132106	-0.0124285	0.957144	-0.166875	0.658656	-0.0745618	0.914938	-0.021437	0.999983	0.0789207	0.999778	-0.286421	0.243394	-0.0126691	0.999992	0.14123	0.999994	0.0631257	0.999959
Atg16l2	0.0326492	0.976444	0.0369172	0.949409	0.327102	0.48905	0.228764	0.698638	0.552919	0.0695789	0.0390735	0.947839	-0.364541	0.509411	0.208743	0.942119	0.0836894	0.882221	-0.19208	0.672727	-0.113032	0.930937	0.547297	0.298234	-0.248208	0.999983	0.0585744	0.999778	-0.125127	0.897201	-0.0447484	0.999992	0.028977	0.999994	0.165751	0.999959
Atg2a	0.154601	0.857004	-0.263373	0.452964	0.80935	0.00948431	0.810701	0.00440881	0.0342789	0.934307	-0.0695395	0.916967	0.0617139	0.931423	0.0426219	0.989467	-0.73485	0.00737861	-0.189604	0.562147	0.0250728	0.992151	-0.351442	0.438773	-0.0506386	0.999983	0.0831516	0.999778	-0.439637	0.263857	0.214971	0.999992	0.0885018	0.999994	-0.0515488	0.999959
Atg2b	-0.343584	0.538012	-0.0782223	0.892034	0.185576	0.679838	0.0556956	0.951387	-0.337852	0.206695	-0.47133	0.212244	0.45681	0.222811	-0.0303369	0.989467	0.286993	0.390328	0.360892	0.245141	-0.0323973	0.992151	-0.303615	0.566168	0.0897061	0.999983	-0.00268148	0.999778	-0.0748215	0.938275	-0.0812794	0.999992	0.0885338	0.999994	0.0992362	0.999959
Atg3	0.29158	0.750774	0.296268	0.53463	-0.27012	0.618654	-0.115703	0.893375	-0.0148809	0.972804	0.0445435	0.944589	-0.136382	0.848409	0.748421	0.218335	-1.38617	7.01407e-05	-0.586837	0.109058	0.227164	0.819729	-0.0263589	0.996107	0.0151888	0.999983	-0.135343	0.999778	0.733239	0.105554	-0.0416914	0.999992	-0.117757	0.999994	-0.0552907	0.999959
Atg4a	-0.122199	0.926965	-0.0918736	0.892034	-0.486165	0.233647	-0.354194	0.453411	-0.251213	0.463129	0.0392055	0.947384	-0.508163	0.242141	0.365897	0.72298	-0.59667	0.089887	-0.839099	0.0104013	-0.229326	0.790943	0.0504154	0.992095	-0.0348092	0.999983	-0.0793826	0.999778	-0.235714	0.735817	-0.146899	0.999992	0.094985	0.999994	0.0776922	0.999959
Atg4b	-0.05202	0.959415	-0.297009	0.127878	0.0370705	0.930751	0.166117	0.554213	-0.0139767	0.954745	0.205696	0.414814	-0.0348014	0.952829	-0.132475	0.901568	-0.34954	0.0824411	-0.462669	0.0125642	-0.02578	0.990837	0.123962	0.813407	-0.134583	0.999983	0.281374	0.999778	-0.337847	0.163167	-0.0237106	0.999992	0.0878813	0.999994	0.0628666	0.999959
Atg4c	-0.248072	0.754697	0.104771	0.852032	-0.4845	0.196252	-0.459268	0.242047	-0.631918	0.0213547	-0.162177	0.749842	-0.478166	0.234322	0.108552	0.989467	-0.475707	0.15359	-1.01671	0.000596827	-0.188975	0.829011	0.0979969	0.940913	0.224369	0.999983	-0.104464	0.999778	-0.00885126	0.996583	-0.073462	0.999992	-0.0942617	0.999994	-0.108453	0.999959
Atg4d	0.196025	0.851161	-0.146192	0.795738	0.509894	0.228703	0.441433	0.339738	0.470808	0.139183	0.389005	0.406706	-0.170337	0.793053	0.0792181	0.989467	-0.478006	0.199167	-0.343128	0.358719	-0.0413252	0.992151	0.108439	0.940113	-0.291601	0.999983	0.0810441	0.999778	-0.675215	0.12964	-0.0145547	0.999992	-0.145594	0.999994	0.0190129	0.999959
Atg5	-0.0895387	0.971741	-0.117014	0.90176	-0.421053	0.513424	-0.25776	0.770669	-0.250489	0.623124	0.235111	0.756638	-0.200951	0.826274	0.602542	0.596916	-0.673554	0.16974	-0.926144	0.0397183	-0.0718934	0.985307	-0.982025	0.0779065	-0.06618	0.999983	-0.05118	0.999778	0.178627	0.893587	-0.0078308	0.999992	-0.0393843	0.999994	-0.026362	0.999959
Atg7	0.344816	0.317309	0.122129	0.681489	-0.00236061	0.993856	0.270766	0.324188	0.254219	0.184688	-0.234678	0.40004	0.132182	0.739212	0.0424026	0.989467	-0.291076	0.232604	0.131982	0.625213	0.0291231	0.99142	-0.166019	0.750643	0.0188139	0.999983	0.130269	0.999778	-0.187813	0.625397	0.0703325	0.999992	-0.104822	0.999994	-0.0918857	0.999959
Atg9a	-0.0265587	0.97851	-0.412347	0.26773	0.973228	0.00678239	0.558125	0.156516	-0.181117	0.614802	0.135825	0.816117	0.248131	0.635383	-0.204894	0.929094	-0.720922	0.0292967	-0.0348137	0.934604	-0.226252	0.786744	-0.196899	0.83703	-0.104796	0.999983	0.153066	0.999778	-0.432724	0.373061	-0.0221045	0.999992	0.109451	0.999994	-0.00721622	0.999959
Atg9b	0.498817	0.710557	0.342905	0.662695	1.56726	0.00766348	0.224659	0.861238	0.0719907	0.93298	1.57399	0.0115294	-1.84043	0.0594865	0.158801	0.989467	-1.11299	0.179364	0.599136	0.548943	-0.587153	0.65346	-0.150617	0.96582	0.446541	0.999983	0.246687	0.999778	-0.0848865	0.989689	-0.14882	0.999992	0.290879	0.999994	0.0993121	0.999959
Atic	0.096326	0.943288	0.497843	0.106577	-0.0347659	0.960682	-0.223066	0.643158	0.634201	0.0136986	-0.0298036	0.954092	0.152956	0.785726	-0.0805034	0.989467	0.28103	0.411678	0.636955	0.0298178	0.294836	0.63812	0.0514271	0.984731	-0.0352531	0.999983	0.0127494	0.999778	0.0293085	0.996583	-0.0888641	0.999992	0.169063	0.999994	0.175011	0.999959
Atl1	-0.243784	0.792175	-0.513111	0.166394	-0.346423	0.464077	-0.591777	0.141588	-1.2951	5.73496e-06	-0.50202	0.270544	0.582369	0.449232	-0.322847	0.8702	0.778396	0.115656	0.365914	0.547109	-0.468038	0.570762	-0.180073	0.917529	0.0709339	0.999983	-0.0836222	0.999778	0.247098	0.663587	-0.0779239	0.999992	0.156662	0.999994	0.069996	0.999959
Atl2	-0.22924	0.809782	-0.196006	0.700562	-0.312082	0.519215	-0.153658	0.835717	-0.735683	0.014811	-0.00300695	0.996188	-0.103555	0.889029	-0.171833	0.965739	-0.197538	0.653326	-0.596895	0.0839647	-0.330272	0.656556	-0.141117	0.918079	-0.0274988	0.999983	0.00519163	0.999778	-0.380929	0.498426	-0.067409	0.999992	-0.30238	0.999994	-0.0431757	0.999959
Atl3	-0.312647	0.372558	-0.0459705	0.903189	-0.0834155	0.82136	-0.235337	0.401613	-0.476586	0.00683796	-0.339535	0.212244	-0.102119	0.806469	-0.0556861	0.989467	0.231231	0.335122	0.0139836	0.959724	-0.338976	0.271109	0.102624	0.897749	0.219342	0.999983	-0.117968	0.999778	-0.105629	0.837426	-0.0928484	0.999992	-0.0939803	0.999994	-0.0275285	0.999959
Atm	-0.811386	0.280853	0.0649774	0.937243	0.15458	0.867323	-0.170198	0.876299	-0.581311	0.189837	-0.80181	0.201866	0.249621	0.781768	0.0405359	0.989467	1.00213	0.0390113	0.908055	0.0596968	0.108656	0.962251	-0.201059	0.913155	0.346655	0.999983	-0.030781	0.999778	0.151545	0.911672	-0.00672225	0.999992	0.0100804	0.999994	0.060771	0.999959
Atmin	-0.0820876	0.911349	0.00491407	0.988777	0.0533677	0.898798	0.180795	0.549481	-0.0429313	0.880884	-0.23111	0.393992	0.311049	0.261059	0.0712776	0.989467	-0.00901451	0.975322	0.406114	0.0548127	0.33089	0.271368	0.221065	0.551041	0.00394417	0.999983	-0.0610121	0.999778	0.0144222	0.996583	-0.0830599	0.999992	0.0469095	0.999994	0.033334	0.999959
Atn1	0.198009	0.878695	-0.0807715	0.913511	0.881082	0.0605906	0.89874	0.0457234	0.431692	0.271613	-0.201603	0.766284	0.894548	0.0576253	0.155442	0.989467	0.17368	0.756116	0.547915	0.194969	-0.152809	0.9207	-0.302205	0.75755	-0.144169	0.999983	-0.0896842	0.999778	0.360352	0.621901	0.105972	0.999992	-0.12718	0.999994	-0.0931743	0.999959
Atoh1	-0.356651	0.971741	-0.564008	0.90176	-0.246097	0.960682	-0.127338	0.99019	0.309329	0.93298	-0.422847	0.930745	0.504908	0.577481	-0.149903	0.989467	0.286059	0.710625	0.796633	0.191025	0.33453	0.842696	0.353284	0.831219	-0.0373553	0.999983	-0.164044	0.999778	-1.78874	0.662257	-0.0480762	0.999992	-0.174343	0.999994	-3.52437	0.999959
Atoh7	0.605142	NA	-0.564006	0.942829	-0.246096	NA	1.68958	NA	0.309328	0.957112	-3.88235	NA	-0.00839076	NA	0.251163	0.989467	-0.503758	NA	-0.564093	NA	-0.102793	NA	-0.053372	NA	-0.0687488	0.999983	-0.554327	0.999778	1.43367	NA	-0.558216	0.999992	-0.718877	NA	-1.08161	0.999959
Atoh8	0.271474	0.789025	-0.662083	0.0905873	1.00287	0.0185302	0.694051	0.12385	-0.271693	0.484986	0.737713	0.145647	0.641657	0.294044	0.154129	0.989467	0.425827	0.399039	0.208219	0.732772	-0.258388	0.820271	0.161702	0.925725	0.0543183	0.999983	0.625442	0.999778	-0.614827	0.470259	0.790513	0.999992	0.197546	0.999994	2.1035e-05	0.999977
Atox1	0.301993	0.839468	-0.217446	0.794466	0.199131	0.831126	-0.208956	0.853859	0.490571	0.328518	0.737031	0.27943	-0.344316	0.683548	0.539525	0.739736	-0.903242	0.0883728	-1.03878	0.0375463	-0.501801	0.643272	-0.536766	0.566463	-0.174436	0.999983	0.223692	0.999778	-0.940437	0.162345	0.099499	0.999992	-0.0708993	0.999994	-0.214671	0.999959
Atp10a	-0.138523	0.924816	-0.0935866	0.90176	0.252795	0.658434	1.37324	4.67071e-05	0.164088	0.70256	-0.332159	0.52143	0.437478	0.452684	0.164849	0.984793	0.630227	0.134002	1.02678	0.0106258	-0.491662	0.476138	0.0183858	0.996107	0.157195	0.999983	0.38321	0.999778	0.23766	0.761342	0.667648	0.999992	0.484568	0.999994	0.288215	0.999959
Atp10b	1.16325	0.542784	0.870892	0.432052	0.324713	0.911261	-0.488895	0.737852	-0.106266	0.933176	-1.1088	0.458291	0.511141	0.524568	0.183646	0.989467	-1.1161	0.0438153	0.338279	0.60016	0.581226	0.592715	-0.828527	0.293805	0.105681	0.999983	-0.0934123	0.999778	-0.0270852	0.996583	-0.322795	0.999992	-0.167788	0.999994	0.112467	0.999959
Atp10d	-0.228706	0.848816	-0.144059	0.83702	0.289839	0.632703	0.104898	0.919747	-0.264907	0.53313	-0.585385	0.27297	-0.0824325	0.942232	-1.26288	0.00669397	0.530938	0.238578	1.06948	0.0082462	-0.0801668	0.972375	0.86934	0.0802181	0.0490044	0.999983	0.0916644	0.999778	-0.106651	0.940689	-0.058002	0.999992	0.297113	0.999994	-0.00871041	0.999959
Atp11a	-0.311968	0.755437	0.0149949	0.982409	0.164186	0.816109	0.681641	0.145648	-0.639816	0.0718143	-0.471615	0.370301	0.214384	0.775377	-0.372452	0.806117	0.777764	0.060777	1.29364	0.000863649	-0.0753226	0.974908	0.407195	0.590958	0.13206	0.999983	0.00312108	0.999778	0.269155	0.735817	0.0853041	0.999992	0.0811893	0.999994	0.020292	0.999959
Atp11b	-0.473246	0.400309	-0.0589372	0.91971	-0.0597636	0.93717	-0.133178	0.848251	-0.603893	0.0324103	-0.459537	0.278792	-0.229344	0.655192	-0.507737	0.450211	0.380209	0.27867	0.30845	0.374886	0.0606057	0.974182	-0.0361745	0.996107	0.0317914	0.999983	-0.153397	0.999778	0.32792	0.540642	0.0494654	0.999992	-0.0789148	0.999994	-0.00283654	0.999959
Atp11c	-0.588863	0.574766	-0.293858	0.698817	-0.1866	0.847026	-0.245275	0.822894	-1.12437	0.0124956	-0.6687	0.32866	-0.226195	0.835364	-1.03516	0.249218	1.15062	0.0312646	0.516421	0.380406	0.0154146	0.993574	0.693941	0.399472	0.33624	0.999983	-0.183527	0.999778	0.355118	0.73508	0.154346	0.999992	-0.206727	0.999994	-0.0487011	0.999959
Atp12a	-1.45418	NA	0.935547	NA	0.459161	NA	0.666136	NA	1.21348	0.535242	-1.08782	NA	-0.00839078	NA	0.251164	0.989467	-0.50376	NA	-0.564095	NA	-1.06459	NA	-0.0533722	NA	1.50879	0.999983	0.897403	0.999778	-2.16255	NA	-0.767656	0.999992	-0.388925	NA	2.53393	0.999959
Atp13a1	0.232042	0.746734	0.00606299	0.990373	0.696463	0.0308693	0.689822	0.0229066	0.374731	0.152624	-0.1754	0.690975	0.324367	0.408713	-0.229837	0.863487	-0.248435	0.453788	0.317713	0.295623	0.0919845	0.930565	-0.432283	0.295344	0.0209553	0.999983	0.204807	0.999778	-0.221304	0.683066	0.158702	0.999992	-0.0197125	0.999994	-0.554217	0.999959
Atp13a2	0.381742	0.699335	0.532786	0.266079	0.257961	0.701593	0.774241	0.117915	0.385874	0.354482	0.140459	0.864581	0.217377	0.788737	-0.0538519	0.989467	0.212864	0.707019	0.901821	0.0341057	-0.0495086	0.992151	0.178468	0.914938	-0.108208	0.999983	0.0109901	0.999778	-0.146746	0.901138	0.043776	0.999992	0.0758624	0.999994	-0.0111817	0.999959
Atp13a3	-0.831233	0.234068	0.107427	0.90176	0.0243491	0.977831	-0.145643	0.892426	-0.834161	0.0388521	-0.569699	0.3454	-0.794714	0.167397	0.114533	0.989467	0.980014	0.0352722	0.348685	0.51309	-0.0395173	0.992151	0.411848	0.667511	0.210374	0.999983	-0.115628	0.999778	0.123971	0.934507	-0.0231188	0.999992	-0.193737	0.999994	0.0674944	0.999959
Atp13a4	-0.255885	0.755437	0.263761	0.531226	-0.96843	0.00558897	-0.181721	0.766746	-0.644018	0.0231599	-0.0080494	0.988174	-2.83478	0.251429	-1.22193	0.933946	-0.802948	0.641515	-1.44396	0.565962	-1.68755	0.615788	1.13866	0.716638	0.222635	0.999983	-0.119173	0.999778	0.202248	0.767935	0.128137	0.999992	0.008095	0.999994	0.0918383	0.999959
Atp13a5	-0.852562	0.382877	-1.61505	0.00632871	-1.06667	0.0845039	-1.10363	0.0656364	-1.55573	0.0110598	-0.369027	0.665313	0.953405	0.835364	0.251164	0.989467	-0.50376	0.882221	-0.564095	0.855774	-1.06459	0.891529	-0.0533722	0.996107	0.295098	0.999983	0.010642	0.999778	-0.417325	0.544065	-0.096315	0.999992	-0.0230354	0.999994	-0.268414	0.999959
Atp1a1	-0.0498116	0.971741	0.144054	0.752828	-0.0744815	0.902386	0.467433	0.197537	0.143193	0.669471	-0.341991	0.3868	0.24108	0.597884	-0.0217375	0.989467	-0.635266	0.0324087	0.0947483	0.811814	-0.0277224	0.992151	-0.0670962	0.968345	0.0202632	0.999983	0.0608448	0.999778	-0.265592	0.612979	-0.0788823	0.999992	0.324999	0.999994	-0.0104663	0.999959
Atp1a2	0.0872163	0.971741	-0.982361	0.0197153	0.642306	0.227127	-0.751742	0.145975	-1.34535	0.000225639	-0.330577	0.604459	0.57871	0.346323	0.746315	0.402906	0.98454	0.0291887	0.940406	0.034711	-1.00801	0.0581397	-0.18937	0.912677	0.0179544	0.999983	-0.0974344	0.999778	0.0115962	0.996583	0.0247556	0.999992	-0.0873105	0.999994	-0.0344212	0.999959
Atp1a3	1.24087	0.147067	0.372824	0.630402	0.853329	0.236782	-0.413963	0.660177	1.40035	0.00170282	0.103078	0.930745	-1.52714	0.263904	0.230096	0.989467	0.883655	0.290394	0.0559258	0.951935	-1.75204	0.0434955	-0.267809	0.925925	-0.0552316	0.999983	0.00662237	0.999778	-0.085754	0.972046	-0.0171702	0.999992	-0.00300876	0.999994	0.0169606	0.999959
Atp1b1	-0.332651	0.772998	0.431058	0.431602	1.06869	0.0346985	0.595367	0.302694	-0.515413	0.220843	0.708145	0.231487	-0.158946	0.857422	-0.212994	0.969115	-0.641285	0.173094	0.068648	0.905179	0.0497313	0.992151	0.00736402	0.996554	0.0511528	0.999983	-0.0981954	0.999778	0.146358	0.907935	-0.0366231	0.999992	-0.0920244	0.999994	0.0178216	0.999959
Atp1b2	-0.0868041	0.968737	-1.1665	0.000390394	0.0387287	0.960682	0.168944	0.827433	-1.48568	8.08519e-07	-0.641673	0.187552	0.826645	0.160957	0.334045	0.859993	0.658793	0.143432	0.691433	0.1672	-0.88984	0.0816283	-0.637995	0.302386	-0.0110231	0.999983	-0.0510847	0.999778	0.407427	0.472296	-0.0279411	0.999992	-0.177826	0.999994	-0.129171	0.999959
Atp1b3	0.00333842	0.996045	-0.144888	0.614941	-0.431275	0.0715728	-0.397983	0.0982189	-0.244122	0.215403	0.283102	0.304168	-0.216245	0.5025	-0.0561157	0.989467	0.259926	0.276649	0.075315	0.799961	-0.192746	0.684053	0.167772	0.736237	-0.0752233	0.999983	-0.0835039	0.999778	0.275261	0.377795	-0.00815136	0.999992	-0.053853	0.999994	0.00690366	0.999959
Atp1b4	-0.356626	NA	-2.96946	NA	-0.246079	NA	-4.50469	NA	-0.652419	NA	1.53243	NA	-0.00839018	NA	0.251146	NA	-0.503724	NA	-0.564054	NA	-1.06451	NA	-0.0533684	NA	1.80164	NA	-0.164027	0.999778	-0.0946787	NA	1.88335	0.999992	-0.174324	NA	0.671749	0.999959
Atp23	-0.160199	0.857083	0.243792	0.528215	-0.3764	0.321281	-0.250906	0.582779	-0.323806	0.246371	0.190916	0.680295	-0.221973	0.661043	0.405481	0.571359	0.281357	0.42467	-0.115152	0.780131	-0.172496	0.841181	-0.0973644	0.939534	-0.219925	0.999983	-0.131894	0.999778	0.204217	0.731099	-0.0611832	0.999992	-0.115543	0.999994	-0.119082	0.999959
Atp2a1	0.163818	0.971741	-0.799907	0.392032	1.10775	0.242606	0.625255	0.607751	-1.09118	0.12434	0.376014	0.771446	-0.904085	0.517686	-0.329284	0.989467	0.882892	0.419176	-0.63268	0.596053	-0.732318	0.708048	0.0156593	0.996554	-0.596276	0.999983	0.406403	0.999778	-3.83958	5.33833e-08	1.04663	0.999992	-0.52315	0.999994	0.796496	0.999959
Atp2a2	-0.247906	0.68249	-0.0905335	0.849732	0.228608	0.548832	0.293121	0.430098	-0.248087	0.344291	-0.521754	0.143855	0.281418	0.454938	-0.087896	0.989467	-0.00128311	0.997337	0.622922	0.0154806	0.0202122	0.992151	0.0761861	0.949518	0.016118	0.999983	-0.0637462	0.999778	0.0633565	0.947815	-0.0959165	0.999992	0.0151666	0.999994	0.0352567	0.999959
Atp2a3	-0.154237	0.968199	-0.30224	0.756659	0.602699	0.48307	-0.30168	0.820887	-0.390842	0.561155	0.307364	0.768905	-0.41294	0.693646	0.24312	0.989467	0.115152	0.89258	0.360399	0.62885	0.268181	0.901053	0.51176	0.714068	-0.523446	0.999983	0.0265113	0.999778	-0.449177	0.71394	-0.279665	0.999992	-0.662362	0.999994	-0.0731691	0.999959
Atp2b1	-0.304285	0.791497	0.19016	0.781888	-0.123015	0.884841	0.107736	0.925548	-0.718465	0.0620379	-0.476415	0.410291	-0.07764	0.952303	0.335776	0.871734	-0.923712	0.0320575	-0.0333593	0.951304	0.969382	0.0608915	-0.0177254	0.996107	0.173049	0.999983	-0.267245	0.999778	0.160099	0.894596	-0.0854267	0.999992	0.130345	0.999994	-0.0236689	0.999959
Atp2b2	0.227649	0.903086	-0.786278	0.239961	0.333977	0.845002	0.914893	0.300834	-1.41412	0.0371871	0.0560236	0.965477	-3.52913	0.00535728	-2.95352	0.391488	3.18774	0.0684974	0.44043	0.725459	-0.471581	0.802891	-0.319566	0.902808	-0.0591693	0.999983	-0.0246507	0.999778	0.167568	0.457238	-0.104557	0.999992	0.0109559	0.999994	-0.0873605	0.999959
Atp2b3	-0.628811	0.539845	-2.64966	4.1334e-06	-0.638979	0.560857	0.574445	0.384596	-2.95632	2.70791e-06	0.167498	0.878314	1.00701	0.44764	0.563523	0.810344	0.70033	0.438764	1.36123	0.195841	-1.28604	0.135149	-0.744721	0.480896	-0.0265364	0.999983	0.167164	0.999778	-0.0957155	0.878466	-0.113382	0.999992	-0.0410563	0.999994	-0.0954489	0.999959
Atp2b4	-0.533779	0.498417	-0.425387	0.396895	-0.108966	0.897592	-0.0226441	0.99019	-0.976427	0.00626473	-0.84912	0.12384	0.299709	0.664238	0.527039	0.617486	0.991505	0.0169438	0.668379	0.118147	-1.04118	0.0307158	-0.361228	0.683919	0.26686	0.999983	-0.190466	0.999778	0.35615	0.636341	-0.0712759	0.999992	0.2616	0.999994	0.0314612	0.999959
Atp2c1	-0.58391	0.414605	-0.241208	0.676439	0.0185645	0.979694	0.313729	0.624603	-0.80537	0.0222997	-0.441086	0.414988	-0.0390634	0.991151	-0.216863	0.959674	0.00566343	0.99259	0.0230103	0.964363	0.338309	0.710293	0.235535	0.846673	0.0221257	0.999983	-0.106551	0.999778	0.0283055	0.996583	0.0297105	0.999992	-0.0313724	0.999994	0.0632252	0.999959
Atp2c2	0.0736881	0.971741	0.0428245	0.961504	1.14111	0.0605841	1.04175	0.0862915	-0.491416	0.33242	0.821828	0.239062	0.0771812	0.969319	-0.120057	0.989467	-0.0314024	0.96578	1.34812	0.0068049	0.216472	0.902521	0.543647	0.559741	0.0236105	0.999983	-0.817634	0.999778	-0.661277	0.568799	0.208791	0.999992	0.925697	0.999994	-0.206068	0.999959
Atp4a	0.0165815	0.996841	1.32128	0.368753	-0.169923	0.960682	2.44781	0.217481	0.147028	0.93298	0.829038	0.665275	0.441912	0.833284	0.829434	0.866268	-1.61129	0.141199	-1.10406	0.317646	-0.944814	0.678314	-1.64843	0.2569	-1.26232	0.999983	1.1552	0.999778	-0.213699	0.965241	0.00888288	0.999992	-1.07322	0.999994	0.279778	0.999959
Atp4b	-0.356626	NA	-0.563968	NA	-0.246079	NA	-4.35265	NA	-0.652419	NA	-0.422816	NA	-0.00839018	NA	0.251146	NA	-0.503724	NA	1.64568	NA	-0.102786	NA	-0.0533684	NA	-2.07322	NA	-1.57049	0.999778	-1.81338	NA	-0.0480727	0.999992	-1.88408	NA	-0.289977	0.999959
Atp5f1a	0.165808	0.80636	-0.0584204	0.90176	-0.248309	0.459625	-0.505945	0.0697465	0.112916	0.691396	-0.016131	0.969749	0.0371765	0.967465	-0.0577177	0.989467	-0.493504	0.0486825	-0.235349	0.379756	-0.0951961	0.917302	-0.266235	0.545307	-0.100777	0.999983	0.0459432	0.999778	-0.122875	0.83615	-0.123871	0.999992	-0.0658556	0.999994	-0.030043	0.999959
Atp5f1b	0.0786627	0.966395	-0.194513	0.660863	-0.211667	0.657966	-0.716198	0.0334268	-0.00290468	0.994337	0.225008	0.626604	-0.0847521	0.904635	0.0899603	0.989467	-0.444968	0.179536	-0.309601	0.356567	-0.0824846	0.950161	-0.284855	0.653228	-0.120884	0.999983	0.0743039	0.999778	-0.410357	0.374982	-0.057366	0.999992	-0.0710182	0.999994	-0.0179333	0.999959
Atp5f1c	0.178589	0.869621	-0.0285532	0.962138	-0.538669	0.195964	-0.585042	0.161349	0.211434	0.573034	0.330905	0.490023	-0.580124	0.179013	0.136283	0.989467	-0.490683	0.185592	-0.800981	0.0168234	-0.109544	0.932764	-0.171307	0.891411	-0.0321387	0.999983	-0.024654	0.999778	0.163054	0.852641	-0.0743542	0.999992	-0.0817979	0.999994	-0.167972	0.999959
Atp5f1d	0.628933	0.735553	0.41658	0.707138	1.43431	0.0988197	0.688458	0.538449	1.17305	0.0832652	1.06226	0.285004	0.0999921	0.975721	0.572888	0.875598	-0.665456	0.442175	-0.514651	0.553207	-0.127763	0.981102	-0.14842	0.977572	-0.449172	0.999983	0.211693	0.999778	-0.998041	0.368869	-0.0128351	0.999992	0.0759673	0.999994	-0.106165	0.999959
Atp5f1e	0.330593	0.809854	-0.265911	0.723008	0.708534	0.24736	-0.0271849	0.99019	0.676164	0.142342	0.861216	0.197548	-0.516886	0.465185	0.489498	0.776738	-0.595354	0.276831	-0.921065	0.0605597	-0.37132	0.758459	0.0418403	0.996107	-0.232017	0.999983	0.0716095	0.999778	-1.07762	0.0754758	-0.0309387	0.999992	-0.0836568	0.999994	-0.216186	0.999959
Atp5if1	0.463941	0.529295	0.18843	0.744766	-0.170087	0.794596	0.0288242	0.99019	1.06172	0.000825601	0.349284	0.504911	-0.187536	0.789177	0.371886	0.771074	-0.603487	0.124016	-0.725358	0.0487442	-0.318641	0.70569	-0.381195	0.588871	-0.140227	0.999983	-0.0310578	0.999778	0.417367	0.493434	-0.0335973	0.999992	0.0277356	0.999994	-0.194935	0.999959
Atp5mc1	0.206877	0.908892	0.0111815	0.990166	0.223563	0.798038	-0.229921	0.828622	0.898521	0.0437516	0.506486	0.458881	-0.493117	0.497032	0.420915	0.84994	-0.543488	0.330411	-0.65583	0.203924	-0.105338	0.96607	-0.215349	0.911562	-0.133788	0.999983	0.185313	0.999778	-1.02971	0.0937846	-0.19769	0.999992	-0.0496563	0.999994	-0.0911091	0.999959
Atp5mc2	0.243043	0.787719	0.108758	0.861819	0.331087	0.475732	-0.151443	0.834652	0.685008	0.0213407	0.556325	0.217541	-0.413808	0.368147	0.269988	0.867602	-0.392892	0.294142	-0.781669	0.0167692	-0.254439	0.754612	-0.123816	0.924965	-0.0870176	0.999983	0.0711075	0.999778	-0.0790228	0.949911	-0.0151534	0.999992	-0.0180603	0.999994	-0.133238	0.999959
Atp5mc3	0.261059	0.803251	0.145462	0.823648	-0.447911	0.366714	-0.44213	0.400347	0.65698	0.0553046	0.226668	0.705391	-0.294725	0.62384	0.164413	0.984459	-0.525828	0.199406	-0.648468	0.0882442	-0.176018	0.89144	-0.26725	0.780267	-0.158582	0.999983	0.0410184	0.999778	-0.754529	0.115342	-0.15901	0.999992	-0.242438	0.999994	-0.161246	0.999959
Atp5me	0.435731	0.760698	-0.258013	0.769019	0.490644	0.53146	-0.319202	0.760843	0.969901	0.0510818	0.662807	0.372658	-0.466524	0.584281	0.689115	0.631404	-0.709569	0.240254	-0.903367	0.103847	-0.374232	0.794884	-0.239624	0.911562	-0.110622	0.999983	-0.0771657	0.999778	-0.2877	0.826904	-0.132878	0.999992	-0.118517	0.999994	-0.43333	0.999959
Atp5mf	0.23598	0.847495	-0.197877	0.758081	-0.313511	0.60852	-0.751725	0.119617	0.225817	0.619321	0.285888	0.646138	-0.616437	0.243368	0.489588	0.663854	-0.469691	0.303709	-0.783196	0.0530239	-0.245336	0.832081	-0.310659	0.748045	-0.0137085	0.999983	0.0431386	0.999778	0.0870886	0.959018	-0.0789737	0.999992	-0.108619	0.999994	-0.423998	0.999959
Atp5mg	0.0591794	0.971741	0.018785	0.977891	-0.180296	0.783408	-0.553936	0.253501	0.428911	0.240482	0.509146	0.318102	-0.639288	0.179013	0.205411	0.96016	-0.35881	0.413219	-0.920955	0.0122231	-0.333302	0.695941	-0.217092	0.854161	-0.23364	0.999983	0.110621	0.999778	-0.815126	0.0809975	-0.158796	0.999992	-0.136069	0.999994	-0.279052	0.999959
Atp5mj	0.0765944	0.971741	-0.104588	0.905825	-0.466788	0.481765	-0.649486	0.301873	0.574156	0.209994	0.5829	0.367693	-0.784172	0.196234	0.233893	0.96859	-0.450414	0.417185	-1.07898	0.0212652	-0.369022	0.746124	-0.179107	0.924272	-0.150738	0.999983	0.100375	0.999778	-0.647127	0.366694	-0.23369	0.999992	-0.221169	0.999994	-0.410106	0.999959
Atp5mk	0.239691	0.858122	0.194102	0.785014	-0.559586	0.318749	-0.818559	0.113638	0.297049	0.52519	0.359472	0.572982	-1.00942	0.0441926	0.227659	0.964621	-0.337067	0.525569	-1.26503	0.00251607	-0.334941	0.750275	-0.198163	0.910125	0.0298487	0.999983	-0.0047934	0.999778	-0.471738	0.516521	-0.29391	0.999992	-0.303851	0.999994	-0.462574	0.999959
Atp5pb	0.143807	0.906309	0.0657075	0.916255	-0.642899	0.106998	-0.696777	0.0736386	0.0964811	0.831827	0.278441	0.571806	-0.572695	0.179013	0.062073	0.989467	-0.454819	0.219612	-0.830148	0.0115891	-0.123483	0.921084	-0.155819	0.907369	-0.0178117	0.999983	-0.0786856	0.999778	0.0824691	0.947751	-0.0886973	0.999992	-0.166078	0.999994	-0.150462	0.999959
Atp5pd	0.196745	0.88093	-0.269112	0.641602	-0.382946	0.498707	-0.692511	0.158225	0.328288	0.430235	0.509277	0.351	-0.636946	0.220377	0.331196	0.863487	-0.588457	0.177344	-0.875931	0.0274926	-0.319766	0.736562	-0.0520864	0.996107	-0.100523	0.999983	-0.00557288	0.999778	-0.195193	0.849127	-0.136381	0.999992	-0.120533	0.999994	-0.12664	0.999959
Atp5pf	0.18266	0.870937	-0.0605933	0.925896	-0.421711	0.365002	-0.371589	0.468812	0.341661	0.332457	0.308894	0.543528	-0.672532	0.118983	0.200479	0.951477	-0.399232	0.317664	-0.821032	0.0180149	-0.344931	0.65346	-0.10516	0.947113	-0.00463957	0.999983	-0.027722	0.999778	0.068716	0.966977	-0.17437	0.999992	-0.0259835	0.999994	-0.203354	0.999959
Atp5po	0.227071	0.866313	-0.0355217	0.962319	-0.230385	0.749323	-0.791822	0.119665	0.543676	0.181051	0.705416	0.223182	-0.593334	0.295165	0.381555	0.829362	-0.529736	0.264213	-0.927564	0.0275632	-0.16024	0.921084	-0.0281425	0.996107	-0.138959	0.999983	0.0455835	0.999778	-0.242402	0.804134	-0.187739	0.999992	-0.111408	0.999994	-0.242089	0.999959
Atp6ap1	0.00235183	0.995995	-0.322407	0.0179483	-0.23095	0.167619	0.0413065	0.904183	-0.572081	6.64678e-07	-0.153129	0.422499	0.0917264	0.718066	-0.211521	0.518041	-0.304069	0.041924	-0.0379959	0.855774	-0.179945	0.489409	0.0827044	0.855738	-0.03432	0.999983	-0.023931	0.999778	0.280118	0.110856	-0.0588751	0.999992	0.0698458	0.999994	0.00580646	0.999959
Atp6ap1l	-1.76194	0.708328	-0.793706	0.686466	-0.246097	0.960682	-0.127338	0.99019	0.309329	0.93298	-0.422847	0.930745	-0.00839079	0.999876	0.251164	0.989467	-0.50376	0.882221	-0.564095	0.855774	0.859002	0.9207	-0.0533722	0.996107	0.0062668	0.999983	-0.143381	0.999778	-0.00798092	0.996583	0.0419106	0.999992	0.454852	0.999994	-0.257349	0.999959
Atp6ap2	-0.144655	0.750504	-0.162329	0.475151	-0.707245	5.37835e-05	0.138481	0.634124	-0.783761	7.73937e-08	-0.302694	0.207875	-0.348197	0.115363	-0.525846	0.0171383	0.0639758	0.808402	-0.19714	0.31971	0.0943396	0.869048	0.135812	0.757347	0.0300135	0.999983	-0.098056	0.999778	0.12506	0.726633	-0.0181853	0.999992	-0.0122154	0.999994	0.0361846	0.999959
Atp6v0a1	0.0376871	0.971741	-0.221247	0.423106	0.317832	0.251237	0.381956	0.155234	-0.567983	0.00309182	-0.159474	0.63434	0.270926	0.378596	-0.225248	0.767928	-0.709554	0.0011809	0.224046	0.361507	0.0102322	0.992151	-0.0981787	0.91134	0.0302932	0.999983	-0.0102415	0.999778	-0.0474597	0.958507	-0.0311838	0.999992	0.111754	0.999994	0.0492508	0.999959
Atp6v0a2	-0.122179	0.833141	0.388536	0.0534014	0.0702855	0.85477	0.183088	0.540681	0.147655	0.473861	-0.165437	0.565236	-0.124377	0.714054	-0.326407	0.417335	-0.104124	0.685558	0.153831	0.494949	0.178995	0.681794	0.374309	0.142505	-0.0484165	0.999983	-0.0305348	0.999778	-0.0109541	0.996583	0.0457936	0.999992	0.0248158	0.999994	0.05827	0.999959
Atp6v0a4	-0.491261	0.89501	0.0933254	0.960741	1.03319	0.502044	2.18213	0.0905009	-1.72872	0.0841492	1.75498	0.236309	-1.86121	0.57909	0.251164	0.989467	0.458035	0.893814	0.3977	0.903746	1.7735	0.760389	2.37983	0.564146	1.01356	0.999983	2.63252	0.999778	0.509618	0.894521	1.93708	0.999992	-0.879222	0.999994	1.52952	0.999959
Atp6v0b	0.166456	0.860246	0.014532	0.979251	-0.204733	0.671065	-0.00135139	0.998231	0.0438161	0.93298	0.637559	0.124574	-0.480471	0.226689	0.0206124	0.989467	-0.62893	0.0480746	-0.582824	0.058376	0.0363068	0.992151	0.29012	0.647427	-0.0954586	0.999983	0.141544	0.999778	-0.450205	0.312536	0.00192076	0.999992	0.0516008	0.999994	-0.10794	0.999959
Atp6v0c	0.385274	0.523018	0.346091	0.345311	0.478857	0.197962	0.649898	0.0620829	0.68914	0.010352	0.483809	0.241731	-0.0406787	0.976935	-0.0924722	0.989467	-0.631381	0.0450924	-0.343738	0.296292	-0.16353	0.863735	0.00651307	0.996107	-0.0977983	0.999983	0.0365114	0.999778	-0.282842	0.604494	0.0278202	0.999992	0.0724953	0.999994	0.0397544	0.999959
Atp6v0d1	0.280458	0.629122	0.0391606	0.934779	-0.219073	0.577264	-0.235873	0.56755	0.269694	0.305652	0.333328	0.355166	-0.28039	0.471522	-0.169443	0.930089	-0.333489	0.263556	-0.448621	0.0996131	-0.281666	0.606903	0.195553	0.771109	-0.045888	0.999983	-0.0575632	0.999778	-0.266117	0.56354	-0.016799	0.999992	0.15965	0.999994	0.070805	0.999959
Atp6v0d2	1.15206	0.411809	1.05234	0.21703	0.165952	NA	1.23023	0.206966	0.686704	0.363333	0.454609	0.731964	-2.18464	NA	-0.0630942	0.989787	-0.50376	NA	-2.38804	NA	3.06967	NA	-2.50429	0.47891	-0.0433807	0.999983	-0.899489	0.999778	0.0375999	0.996583	-0.0577465	0.999992	0.0599991	0.999994	-0.0916472	0.999959
Atp6v0e1	0.205909	0.801814	0.0897595	0.877193	-0.306669	0.44876	-0.299673	0.490395	-0.0816928	0.838419	0.328624	0.41766	-0.596014	0.094088	-0.193672	0.92373	-0.275925	0.428527	-0.535455	0.0734112	-0.194727	0.807281	0.200942	0.800594	0.271991	0.999983	0.0422773	0.999778	0.377727	0.425373	0.198714	0.999992	-0.063024	0.999994	-0.258801	0.999959
Atp6v0e2	0.42293	0.551698	-0.702262	0.0893904	0.0896689	0.897812	-0.0365959	0.99019	-0.88124	0.00311332	0.280977	0.607726	0.389421	0.600265	0.603137	0.401557	0.332184	0.434729	0.191879	0.735719	-0.915358	0.0307158	0.237594	0.792707	-0.162241	0.999983	0.00433516	0.999778	-0.0482155	0.939766	-0.0185244	0.999992	0.0302082	0.999994	-0.040796	0.999959
Atp6v1a	-0.414384	0.169902	0.171615	0.528269	-0.246317	0.364973	0.00458498	0.991498	-0.379909	0.0405039	-0.341556	0.220156	-0.0919663	0.828314	-0.48393	0.116154	0.202905	0.40246	0.244134	0.279379	0.0244718	0.992151	0.243559	0.500346	0.0768919	0.999983	-0.0261695	0.999778	-0.172298	0.653602	-0.0806165	0.999992	0.108404	0.999994	0.123523	0.999959
Atp6v1b1	0.418911	NA	-2.19087	0.468043	-0.791025	NA	-3.68661	NA	0.428981	0.910055	-2.34728	NA	-0.705143	NA	-1.67872	0.958162	-0.503759	NA	-0.564094	NA	-1.94342	NA	-0.0533721	NA	0.424084	0.999983	2.17955	0.999778	0.553315	NA	-0.0429273	0.999992	-1.53829	NA	0.0213163	0.999959
Atp6v1b2	0.248755	0.503028	0.357262	0.0706722	-0.344829	0.128832	0.358368	0.113638	0.294873	0.0942007	0.15768	0.571967	0.0112244	0.999876	0.0147664	0.989467	-0.495476	0.00981096	-0.358706	0.0619529	0.0517063	0.949787	0.315892	0.239892	-0.0948663	0.999983	0.0615628	0.999778	-0.0472672	0.945529	-0.0649572	0.999992	0.137036	0.999994	0.0677723	0.999959
Atp6v1c1	-0.0440747	0.971741	-0.0887079	0.80308	-0.304775	0.253784	0.0491588	0.936804	-0.108527	0.656145	0.190142	0.535035	-0.487425	0.0538646	0.205928	0.802642	-0.214414	0.397855	-0.518754	0.0149011	-0.323204	0.345237	-0.0192306	0.996107	-0.0564802	0.999983	-0.00421547	0.999778	-0.0356063	0.976645	-0.0826556	0.999992	0.0652739	0.999994	-0.0896047	0.999959
Atp6v1c2	-0.309924	0.772998	-0.733788	0.0854109	0.0380737	0.962232	0.655361	0.197027	-1.27951	0.000224006	-0.410472	0.46867	-0.309702	0.928762	-0.982457	0.90599	-0.498488	0.875633	0.3977	0.896427	-0.616946	0.875513	0.817143	0.922474	0.125613	0.999983	-0.203053	0.999778	-0.196606	0.909039	0.252519	0.999992	-0.313594	0.999994	0.408171	0.999959
Atp6v1d	0.102931	0.894041	-0.0527459	0.901877	-0.292731	0.312339	-0.0907209	0.859497	-0.27322	0.207944	0.11986	0.748435	-0.367532	0.210464	-0.117671	0.964801	-0.183802	0.5048	-0.621373	0.00517519	-0.166057	0.77072	0.163349	0.778713	0.0052104	0.999983	-0.0336742	0.999778	0.524623	0.0521969	-0.00341617	0.999992	0.0909767	0.999994	-0.0864218	0.999959
Atp6v1e1	0.187035	0.830026	0.151193	0.745857	-0.164236	0.742687	-0.0953275	0.894728	0.31396	0.284674	0.339374	0.406877	-0.358061	0.386115	-0.0453373	0.989467	-0.341956	0.310178	-0.570796	0.0559443	-0.187095	0.82317	0.140313	0.903386	-0.150661	0.999983	-0.00537491	0.999778	-0.383187	0.404508	-0.128958	0.999992	-0.0320775	0.999994	-0.0665097	0.999959
Atp6v1e2	0.500921	NA	-0.619599	0.714592	0.630013	NA	0.839928	0.697479	1.67871	0.114945	2.23676	NA	-0.970186	NA	2.95767	0.48588	0.458035	NA	0.3977	NA	-0.102793	NA	-0.0533722	NA	-0.243754	0.999983	-1.49269	0.999778	-0.413359	0.877187	-0.136599	0.999992	0.172468	0.999994	-0.94005	0.999959
Atp6v1f	0.385648	0.518185	0.220934	0.598827	0.110706	0.847026	0.320056	0.466423	0.704298	0.00786294	0.466016	0.255048	-0.208912	0.686807	0.275843	0.825782	-0.343706	0.325849	-0.582133	0.0583583	-0.278794	0.684053	0.094197	0.945234	-0.132359	0.999983	0.0358092	0.999778	-0.176121	0.795286	0.0478173	0.999992	0.0412605	0.999994	0.0156578	0.999959
Atp6v1fnb	0.00858233	0.99629	-0.562088	0.435469	0.934342	0.187733	0.645386	0.480628	-0.514194	0.329578	-0.0149974	0.988506	-0.76616	0.672595	-0.839111	0.722967	0.422543	0.733554	-0.745845	0.540374	1.03446	0.466959	1.70906	0.210006	0.186064	0.999983	-0.114656	0.999778	-0.325761	0.750551	-0.749817	0.999992	-0.214627	0.999994	-0.559744	0.999959
Atp6v1g1	0.0768854	0.959761	0.121483	0.78294	-0.422084	0.203593	-0.410824	0.233531	-0.00171073	0.995758	0.408435	0.266325	-0.753708	0.0118069	-0.143575	0.963877	-0.0990767	0.801601	-0.799504	0.0021999	-0.0379466	0.990506	0.379876	0.371889	0.00736574	0.999983	-0.0798743	0.999778	-0.536176	0.124399	0.000682847	0.999992	-0.180126	0.999994	-0.229087	0.999959
Atp6v1g2	0.368339	0.690189	-0.285962	0.582825	0.958197	0.0260094	0.216289	0.80304	-0.246689	0.471895	0.615329	0.295112	-0.668594	0.449819	0.141034	0.989467	1.0435	0.16275	-0.494223	0.477079	-0.720263	0.369676	-0.282277	0.880131	-0.151165	0.999983	-0.0988935	0.999778	0.188215	0.386713	-0.0469047	0.999992	0.0273258	0.999994	-0.0553734	0.999959
Atp6v1g3	0.605144	0.963854	-1.05522	0.704685	-0.246097	0.960682	-3.59913	0.0961561	3.74013	0.0237852	-0.422847	0.930745	-0.00839079	0.999876	0.251164	0.989467	-0.50376	0.882221	-0.564095	0.855774	-0.102793	0.992151	-0.0533722	0.996107	0.383115	0.999983	-0.200523	0.999778	0.472283	0.615467	-0.135507	0.999992	-0.840196	0.999994	-0.277645	0.999959
Atp6v1h	0.03295	0.971741	0.148509	0.472294	-0.341745	0.0717348	-0.351327	0.0548195	-0.318738	0.0272375	0.216676	0.323773	-0.236506	0.291731	-0.0731994	0.982344	-0.107368	0.6185	-0.143535	0.456464	-0.0500056	0.938839	0.165891	0.616777	-0.0205258	0.999983	-0.00569762	0.999778	-0.101792	0.766234	-0.117328	0.999992	-0.0164605	0.999994	0.0141047	0.999959
Atp7a	-0.685835	0.485533	-0.248689	0.759505	0.0267896	0.977951	-0.0439493	0.99019	-0.991143	0.0314263	-0.564506	0.4221	0.0259466	0.999876	0.14189	0.989467	-0.551044	0.35141	-0.136401	0.855774	0.411696	0.73207	-0.232891	0.911071	0.348716	0.999983	-0.0861628	0.999778	0.361891	0.731788	-0.0191616	0.999992	-0.024299	0.999994	-0.161804	0.999959
Atp7b	-0.0729302	0.971741	-0.755787	0.118005	0.611768	0.296547	0.0252773	0.99019	-0.767604	0.0624629	-0.108809	0.921897	0.668748	0.251026	-0.169347	0.989467	-0.277157	0.625327	0.290379	0.584331	-0.0392115	0.992151	-1.19125	0.0165896	-0.130477	0.999983	0.141865	0.999778	-0.422316	0.611709	0.0743213	0.999992	0.0229626	0.999994	0.12484	0.999959
Atp8a1	-0.240665	0.857201	-0.243585	0.71166	-0.471209	0.426204	-0.175989	0.858816	-0.894107	0.0217471	-1.22966	0.0171328	0.0336133	0.999876	-0.970433	0.16346	0.178785	0.77144	0.17796	0.75707	-0.274746	0.822722	0.31228	0.778831	0.302151	0.999983	-0.138319	0.999778	-0.000888967	0.999684	-0.0848914	0.999992	0.284619	0.999994	0.0980561	0.999959
Atp8a2	-0.0283724	0.986361	-1.1567	0.0409097	0.100716	0.946102	-0.0639142	0.990152	-1.30988	0.0122845	-0.173445	0.889598	-0.927207	0.179013	0.316611	0.942119	-0.114569	0.886882	-0.193804	0.791908	0.085664	0.984539	-0.217723	0.920811	0.224859	0.999983	-0.0425651	0.999778	0.0838332	0.974834	-0.0586978	0.999992	0.0942544	0.999994	0.073815	0.999959
Atp8b1	-0.576058	0.528371	0.584111	0.272867	-0.191785	0.819752	-0.238162	0.803357	0.52213	0.24108	-0.502063	0.426494	0.0394122	0.997732	-0.572761	0.637104	0.160485	0.810515	0.159542	0.797602	0.0992018	0.965602	0.00445737	0.997949	-0.189867	0.999983	-0.0398866	0.999778	-0.174469	0.895387	0.0434654	0.999992	-0.561149	0.999994	-0.350977	0.999959
Atp8b2	-0.224915	0.759958	0.11467	0.808195	0.101464	0.852426	0.330622	0.402005	0.487414	0.0570871	-0.200591	0.641969	-0.348908	0.395484	-0.242856	0.856526	0.53255	0.0832431	0.552575	0.0732414	-0.198183	0.792836	0.322625	0.54201	-0.0397974	0.999983	0.050718	0.999778	-0.171816	0.781497	-0.00978031	0.999992	0.243185	0.999994	-0.0385535	0.999959
Atp8b3	-2.11229	NA	-2.75074	NA	1.1155	NA	-2.70535	NA	0.309329	NA	-1.38464	NA	3.23716	NA	3.71895	0.603061	-3.32113	NA	-0.633443	NA	2.82066	NA	1.8871	NA	-0.941915	0.999983	0.220233	0.999778	-3.7655	NA	-1.59673	0.999992	-1.02148	NA	0.478174	0.999959
Atp8b4	-0.0444346	0.97851	2.13003	6.62799e-06	0.06418	0.960682	-0.64909	0.390554	1.87118	4.17231e-05	-0.139956	0.914102	-0.137022	0.928397	-0.455778	0.8677	1.06901	0.0951913	0.124198	0.881034	-0.363246	0.812161	0.311346	0.873396	0.138112	0.999983	-0.149019	0.999778	-0.152227	0.982221	-0.371666	0.999992	-0.301041	0.999994	1.31636	0.999959
Atp9a	-0.0129753	0.986503	-0.655106	0.00738117	0.341371	0.296689	0.544011	0.0624991	-0.502346	0.0284876	0.158161	0.696054	0.248514	0.517686	-0.204658	0.871502	-0.726784	0.00444106	0.0999463	0.768547	0.0727838	0.946307	-0.0664544	0.95827	-0.0625202	0.999983	0.026374	0.999778	-0.405627	0.260668	0.0171241	0.999992	0.14669	0.999994	0.0198941	0.999959
Atp9b	-0.0655001	0.89919	-0.230521	0.150284	0.110435	0.63367	0.246724	0.182016	-0.309317	0.0179846	-0.0402293	0.905649	0.333636	0.107512	0.060674	0.989467	-0.0874391	0.69641	0.0600056	0.799472	0.0482878	0.936704	-0.311274	0.143771	0.040413	0.999983	0.104195	0.999778	-0.183599	0.447625	-0.0066512	0.999992	0.129542	0.999994	-0.0828569	0.999959
Atpaf1	-0.151464	0.755509	0.229199	0.296176	-0.236649	0.344156	-0.210135	0.430245	0.079442	0.722686	-0.118398	0.694793	-0.256085	0.327056	0.273399	0.531284	0.0988001	0.698235	-0.260813	0.202434	0.187298	0.63957	-0.223773	0.500277	-0.0250227	0.999983	0.0428572	0.999778	-0.255245	0.351082	-0.11994	0.999992	-0.00228595	0.999994	0.0893785	0.999959
Atpaf2	0.209789	0.746734	0.134785	0.724347	-0.0462552	0.939716	-0.315438	0.359231	0.53283	0.0150074	0.284266	0.412769	-0.070111	0.905218	0.103828	0.987555	-0.230094	0.445046	-0.542899	0.03224	-0.0188454	0.992151	-0.41002	0.265001	-0.0625597	0.999983	-0.0486245	0.999778	-0.24158	0.582312	-0.0443496	0.999992	-0.0363881	0.999994	-0.0722297	0.999959
Atpsckmt	-0.186838	0.810858	-0.088028	0.869575	-0.658929	0.0421713	-0.280693	0.495117	-0.0516606	0.905144	0.263735	0.509228	-0.605839	0.084415	-0.182687	0.931098	0.0436652	0.914309	-0.205296	0.562708	-0.046205	0.985158	0.0177756	0.996107	-0.142284	0.999983	0.300951	0.999778	-0.224401	0.693453	-0.0950918	0.999992	-0.0186048	0.999994	-0.464196	0.999959
Atr	-0.329313	0.563246	0.281001	0.410092	-0.049406	0.946102	-0.444127	0.200158	0.175033	0.556253	-0.675943	0.0644616	-0.0162642	0.999876	0.190488	0.911465	0.196468	0.589154	-0.937597	0.000757754	-0.429216	0.315545	-0.621315	0.0723687	0.101648	0.999983	0.251304	0.999778	-0.126204	0.865864	-0.0580177	0.999992	0.160621	0.999994	0.0990313	0.999959
Atraid	0.0460058	0.971741	-0.647568	0.0766404	-0.366595	0.445686	-0.399798	0.419414	-0.532574	0.101804	0.404684	0.3999	-0.420549	0.387035	-0.228329	0.9244	-0.672936	0.0669675	-0.84592	0.0136171	-0.339984	0.656556	-0.128077	0.926697	-0.160077	0.999983	0.193805	0.999778	-0.63563	0.177713	0.00682562	0.999992	-0.00494865	0.999994	-0.0573947	0.999959
Atrn	-0.832037	0.420065	-0.459031	0.544989	0.344167	0.712732	0.288761	0.807933	-1.04688	0.0411142	-0.726241	0.342932	0.811398	0.281532	0.197134	0.989467	0.0853089	0.912629	0.618745	0.318277	0.221996	0.917649	-0.571514	0.606254	0.235754	0.999983	-0.098713	0.999778	0.252109	0.867948	-0.0537584	0.999992	0.249337	0.999994	0.0855294	0.999959
Atrnl1	-0.41095	0.566358	-0.689868	0.0542071	-0.241973	0.658772	-0.044196	0.983932	-1.16948	7.98908e-05	-0.463337	0.326113	-0.611999	0.192166	-0.243352	0.91456	0.580927	0.135106	-0.110288	0.836778	-0.415484	0.554958	0.364169	0.608247	0.0845733	0.999983	-0.0345386	0.999778	0.117971	0.907748	-0.0951545	0.999992	0.176102	0.999994	-0.0834315	0.999959
Atrx	-0.656413	0.409491	0.0225845	0.976915	0.163824	0.845002	-0.316161	0.672762	-0.688592	0.0900829	-0.636474	0.284057	0.273262	0.728775	-0.12928	0.989467	0.809024	0.0824298	0.682644	0.13925	0.042772	0.992151	-0.176334	0.920284	0.236563	0.999983	-0.270586	0.999778	0.504978	0.48142	-0.0741539	0.999992	-0.0343932	0.999994	0.0489978	0.999959
Atxn1	-0.296338	0.746734	-0.176944	0.75386	-0.000574525	0.999243	-0.107023	0.903081	-0.582668	0.0762027	-0.234801	0.67399	0.386034	0.459648	-0.489152	0.582253	-0.0804964	0.882221	0.22269	0.612866	-0.247515	0.792836	-0.6432	0.184624	0.066407	0.999983	-0.114187	0.999778	0.271575	0.695648	-0.00134999	0.999992	0.312809	0.999994	0.0694369	0.999959
Atxn10	0.0412246	0.971741	-0.0245163	0.953096	-0.486747	0.0844517	-0.420108	0.146298	-0.0311273	0.93298	-0.0459302	0.930745	-0.181035	0.672721	0.0345047	0.989467	0.31373	0.26104	0.155029	0.61919	0.0160357	0.992151	0.267863	0.563372	0.0275653	0.999983	0.0295779	0.999778	-0.030188	0.99343	-0.0759017	0.999992	0.00165949	0.999994	-0.00542746	0.999959
Atxn1l	-0.46265	0.435296	-0.251243	0.565395	0.107008	0.867324	0.20404	0.72906	-0.442835	0.143038	-0.52131	0.231487	0.720941	0.0634857	0.149925	0.977256	0.126292	0.789017	0.447069	0.198924	0.0762798	0.961121	-0.00884129	0.996107	0.0285482	0.999983	0.0545713	0.999778	0.0641316	0.965514	0.0142181	0.999992	0.152587	0.999994	0.104985	0.999959
Atxn2	-0.0344157	0.971741	-0.25659	0.357354	0.147588	0.692737	-0.0506035	0.941567	-0.613806	0.00210959	-0.217276	0.50307	0.58526	0.0355921	0.136719	0.947703	-0.202963	0.479781	0.460944	0.0614181	-0.167562	0.781134	-0.453589	0.14479	0.068204	0.999983	-0.0312137	0.999778	0.742132	0.00233192	-0.0312924	0.999992	0.0727232	0.999994	-0.0699283	0.999959
Atxn2l	0.0366412	0.972734	0.271844	0.479041	0.700714	0.0445569	0.595346	0.089478	0.360824	0.208726	-0.313039	0.449504	0.646304	0.0704074	0.127507	0.984793	0.0968967	0.829734	0.606124	0.0455644	-0.00276775	0.997318	-0.274475	0.666459	0.0717801	0.999983	-0.0156869	0.999778	0.193801	0.759251	0.046104	0.999992	-0.000606694	0.999994	0.0590581	0.999959
Atxn3	-0.531001	0.192666	-0.0780874	0.886899	-0.163446	0.714635	-0.11542	0.847776	-0.686483	0.00361995	-0.213161	0.596453	-0.134234	0.806883	-0.0537663	0.989467	0.0535874	0.889576	0.179515	0.596051	0.222352	0.727069	-0.0904413	0.938669	0.181889	0.999983	-0.11375	0.999778	0.581811	0.0900417	0.187686	0.999992	-0.00589909	0.999994	0.0777555	0.999959
Atxn7	-0.202036	0.824716	-0.0778441	0.90176	0.0602394	0.93755	0.0527849	0.965181	-0.744523	0.00752672	-0.522415	0.2242	0.551622	0.185909	0.0858039	0.989467	0.397879	0.275069	0.440713	0.2098	0.115596	0.922162	-0.154588	0.902484	0.104853	0.999983	-0.0649463	0.999778	0.535958	0.227463	0.0935378	0.999992	-0.106276	0.999994	-0.112666	0.999959
Atxn7l1	0.24383	0.361776	0.394412	0.00689886	0.170989	0.418684	0.249417	0.198087	0.355362	0.00752372	-0.170779	0.42098	-0.0880155	0.7782	0.189091	0.669226	0.199496	0.280337	0.214045	0.238952	0.109842	0.788539	-0.152416	0.646956	0.0652623	0.999983	0.0659401	0.999778	0.344536	0.0607272	0.0742607	0.999992	0.131961	0.999994	0.142532	0.999959
Atxn7l2	0.0515077	0.971741	0.157466	0.760412	0.52978	0.197258	0.721986	0.0604141	0.468838	0.11695	0.104797	0.879204	0.113802	0.893962	0.047066	0.989467	0.253245	0.593471	0.497617	0.228988	-0.208265	0.840744	0.156034	0.912196	-0.131107	0.999983	0.144053	0.999778	-0.087689	0.939945	0.013356	0.999992	0.0971459	0.999994	-0.0791652	0.999959
Atxn7l3	-0.0956733	0.846768	0.0497923	0.876555	0.170844	0.452583	0.389524	0.0300248	0.281416	0.0573498	0.106826	0.677488	0.269918	0.214254	0.078617	0.972047	-0.12506	0.550374	0.205746	0.255045	0.193771	0.545987	0.132428	0.7339	-0.148717	0.999983	-0.0394059	0.999778	-0.312787	0.1318	-0.0918813	0.999992	0.0835015	0.999994	0.015291	0.999959
Atxn7l3b	-0.307748	0.0697351	-0.357079	0.0043528	-0.356575	0.0187049	-0.286001	0.0570226	-0.611272	1.77628e-08	-0.0517838	0.834809	-0.15582	0.436921	-0.199097	0.526425	-0.0470229	0.819643	-0.00762206	0.96674	-0.0371678	0.94841	0.090973	0.810027	-0.0455279	0.999983	0.030942	0.999778	-0.384127	0.00765805	-0.115137	0.999992	-0.0430592	0.999994	0.0141149	0.999959
Auh	-0.099803	0.906464	-0.59532	0.00877298	-0.238593	0.46207	-0.621591	0.0119381	-0.471146	0.0256437	0.0149781	0.971266	-0.321817	0.335316	-0.259752	0.736042	-0.00997702	0.977103	-0.420534	0.091653	-0.137086	0.84717	-0.121558	0.893207	-0.0620605	0.999983	0.0515061	0.999778	0.0659756	0.929664	-0.0435707	0.999992	-0.13603	0.999994	-0.170039	0.999959
Aup1	0.310919	0.623252	0.0484416	0.928072	0.394336	0.286716	0.0991713	0.887479	0.444027	0.0985319	0.203961	0.64857	-0.236211	0.609433	0.105889	0.989467	-0.526517	0.0863427	-0.449252	0.133843	-0.0393208	0.992117	-0.141408	0.89865	-0.148419	0.999983	0.0207222	0.999778	-0.223481	0.697159	-0.0191388	0.999992	-0.0347426	0.999994	-0.0829058	0.999959
Aurka	0.0921069	0.962391	1.18122	8.31219e-05	0.422664	0.35026	0.174894	0.809879	1.86215	4.31556e-12	0.652437	0.171196	-0.00481153	0.999876	-0.119092	0.989467	0.13242	0.784231	0.478494	0.18091	0.179911	0.863743	-0.160096	0.902598	0.132693	0.999983	0.406274	0.999778	-0.162542	0.877009	-0.203167	0.999992	-0.299197	0.999994	0.746163	0.999959
Aurkaip1	0.229764	0.786997	-0.0705965	0.904194	-0.114128	0.847478	-0.197072	0.732234	0.60499	0.0305676	0.481439	0.254807	-0.366574	0.401047	0.214581	0.911465	-0.277775	0.453544	-0.380015	0.256693	-0.212102	0.79844	0.0642504	0.976543	-0.121152	0.999983	0.0633829	0.999778	0.0808473	0.941166	-0.0883153	0.999992	0.052377	0.999994	-0.129022	0.999959
Aurkb	0.190305	0.923445	1.19298	0.0125134	0.322152	0.690208	0.255568	0.813034	2.81293	1.46326e-12	0.263049	0.752722	0.142166	0.897604	-0.193481	0.989467	0.480517	0.40003	0.796558	0.114989	0.399933	0.727069	-0.430644	0.684897	0.883054	0.999983	0.644444	0.999778	0.243517	0.896287	0.144485	0.999992	-0.468198	0.999994	0.886245	0.999959
Aurkc	0.0528635	0.977846	-0.437234	0.526725	0.149042	0.895917	0.678185	0.365984	1.05896	0.0150454	0.367183	0.750703	-0.839168	0.436056	1.08379	0.527901	-0.851243	0.233945	-0.596132	0.485748	0.620438	0.792469	-0.339238	0.909425	-0.163426	0.999983	-0.127812	0.999778	0.315345	0.676054	0.00337257	0.999992	0.0284907	0.999994	-0.168534	0.999959
Auts2	-0.0816788	0.964034	-0.159098	0.742497	0.0514037	0.951078	0.108307	0.885197	-0.0106123	0.977603	-0.168315	0.742389	0.757359	0.0347519	0.155343	0.965739	-0.467105	0.171655	0.349535	0.314161	-0.107311	0.926473	-1.01534	0.00160091	0.0204848	0.999983	-0.108178	0.999778	0.384959	0.41867	0.181264	0.999992	-0.0256824	0.999994	-0.0116109	0.999959
Avil	0.148606	0.971201	0.215445	0.851131	1.9548	0.00413541	-0.105231	0.96681	0.194987	0.809748	2.1179	0.00134747	-0.722831	0.410965	0.0440384	0.989467	-0.0996606	0.905862	0.166883	0.855774	0.127911	0.970202	0.688288	0.549163	0.114004	0.999983	1.60836	0.999778	0.742324	0.606329	0.105263	0.999992	-0.653387	0.999994	-0.604026	0.999959
Avl9	-0.365457	0.765293	-0.146662	0.871276	-0.192129	0.824226	0.214483	0.832643	-0.594279	0.182883	-1.10102	0.0729862	0.14858	0.883428	-0.239941	0.965739	-0.228104	0.719288	0.0967432	0.878034	0.189553	0.912926	-0.796563	0.222191	0.144473	0.999983	-0.131228	0.999778	-0.0664911	0.987529	0.0473962	0.999992	-0.0512707	0.999994	-0.498826	0.999959
Avpi1	-0.0396132	0.973082	-0.352366	0.384413	0.336637	0.462453	-0.187296	0.772305	-0.304503	0.359363	0.666879	0.140337	-0.126884	0.852801	0.745178	0.16346	0.0822676	0.881214	-0.255663	0.51592	0.12081	0.922616	0.279098	0.714653	-0.190062	0.999983	0.0127458	0.999778	0.0245156	0.996583	0.0820929	0.999992	0.181888	0.999994	0.198149	0.999959
Avpr1a	0.1518	0.971741	-0.261146	0.879145	1.12807	NA	-0.202726	0.93883	0.338391	0.74107	-0.128101	0.940337	2.80686	NA	0.258219	0.989467	-0.495268	NA	-2.94011	NA	-0.137829	NA	1.22957	0.794172	0.100696	0.999983	-0.236962	0.999778	-0.312045	0.901138	0.279976	0.999992	0.586457	0.999994	0.503991	0.999959
Avpr1b	-0.373374	0.895227	-1.00499	0.296428	0.18605	0.91704	-0.330689	0.858635	-1.45767	0.0507404	0.351495	0.811577	-0.970186	0.83573	-1.58306	0.905947	0.458035	0.890112	-0.564095	0.857575	-0.102793	0.992151	-0.0533722	0.996107	0.687815	0.999983	0.00635113	0.999778	-0.888734	0.576683	0.144256	0.999992	-0.294114	0.999994	-0.453483	0.999959
[truncated: 31,130 more rows]
