# Supplementary material for: Host Response of Syrian Hamster to SARS-CoV-2 Infection including Differences with Humans and between Sexes
Source: Viruses. 2023 Feb 3;15(2):428. doi: 10.3390/v15020428 (PMC9960357; doi:10.3390/v15020428)
Supplement: Supplementary file 1 [file viruses-15-00428-s001.zip › Table S4.xlsx]

## Sheet: # DEGs
Sample	# Up	# Down
PBMC F 2dpi	512	891
PBMC F 6dpi	1500	1548
PBMC F 14dpi	60	566
PBMC M 2dpi	1489	756
PBMC M 6dpi	754	1358
PBMC M 14dpi	2783	188

## Sheet: DEGs
Gene	PBMC__F__2dpi__infected__VS__PBMC__F__2dpi__mock_log2FC	PBMC__F__6dpi__infected__VS__PBMC__F__6dpi__mock_log2FC	PBMC__F__14dpi__infected__VS__PBMC__F__14dpi__mock_log2FC	PBMC__M__2dpi__inMected__VS__PBMC__M__2dpi__mock_log2MC	PBMC__M__6dpi__inMected__VS__PBMC__M__6dpi__mock_log2MC	PBMC__M__14dpi__inMected__VS__PBMC__M__14dpi__mock_log2MC
A1bg	-0.507741	2.31611	0	0	0	0
A1cf	0	0	0	0	0	0
A2m	0	0	0	0	0	0
A2ml1	0.506754	0.524805	0.505706	0.768221	-1.15456	2.14199
A3galt2	0	0	0	0	0	0
A4galt	1.34352	0	-0.484449	0	-0.243123	0.617524
A4gnt	0	0	0	0	0	0
Aaas	-0.166217	-0.859348	-0.435495	0	-0.476093	0.0836951
Aacs	-1.02593	-0.738831	0	0	-0.556114	1.71605
Aadac	0	0	0	0	0.508854	0
Aadat	0	0	0	0	0	0
Aagab	-0.132586	-0.202886	-0.0186054	0.389698	0	1.12368
Aak1	-0.172964	-0.841631	0	0.0721766	-0.559686	0.762796
Aamdc	0	0	0	0	0	0
Aanat	0	0	0	0	0	0
Aar2	0	-0.105971	-0.203751	0.294443	0	0.981705
Aard	0	3.04375	0	0	0.572133	-0.477504
Aars1	-0.568167	-0.868957	0	-0.363985	-0.60105	0.37228
Aars2	-0.0532175	-1.50572	-0.279824	0	-0.548798	1.03864
Aasdh	0	-0.0509729	-0.586234	0	0	0
Aasdhppt	0	0.104398	-0.571732	0	-0.179533	1.40001
Aass	0	0	0	0	0	0
Aatf	0.213592	-0.240061	-0.771885	0.565509	0	0.902795
Aatk	0	0	0	0	0	0
Abat	0	2.16252	0	0.872195	0.789858	-0.266241
Abca1	1.55127	0.140042	-0.920681	0.876638	-0.614037	0.903851
Abca12	0	0	0	0	0	0
Abca13	0	0	0	0.405914	0	0
Abca2	-0.757561	-2.06458	-0.956119	0.902398	-0.43025	0.734188
Abca4	0	0	0	0	0	0
Abca5	0.242867	0.719913	0	0	0	0.668045
Abca7	-0.356283	-1.319	0	0.260654	-0.838055	0.866634
Abca9	0.429735	-0.723561	0	-1.1787	-0.489578	1.121
Abcb1	0.714199	1.17154	0	1.72626	0.297846	-0.829488
Abcb10	0	0	-0.111263	0	0	0.67784
Abcb11	0	0.738794	0.0520102	0	0	0
Abcb5	0	0	0	0	0	0
Abcb6	0.163828	0	0	0.655166	0	0.0179758
Abcb7	-0.280927	0.504422	-0.182359	0.146996	-0.0282738	0.372241
Abcb8	0	-0.515462	-0.397567	-0.0750677	-0.468707	0
Abcb9	0	0	0	0.909219	0	0
Abcc1	-0.319308	-0.0694338	0.151942	0.0775549	-0.661276	0.340976
Abcc10	0	-0.597615	0	0.0686661	-0.305369	0
Abcc12	0	0	0	0	0	0
Abcc2	0	0.795699	0	0	0.210729	0
Abcc3	0	-1.69621	0	-1.4317	-2.25085	0.584046
Abcc4	0.345182	-0.00750136	0	0	-0.411979	0.646315
Abcc5	0.389474	-0.273704	-0.111177	-0.18049	-0.731941	0.982372
Abcc6	0.254339	0.0619404	0	-1.14544	0	0.787263
Abcc8	0	0	0	0	0	0.545546
Abcc9	0	0	0	0	0	0
Abcd1	-0.367664	0.390004	0.105786	-0.42374	-0.322014	-0.00763638
Abcd2	0	0	0	0	0	0
Abcd3	0.334815	0	-0.336727	0.531728	-0.639832	0.479977
Abcd4	0.017198	-0.339385	-0.124915	0	-0.0958112	0.387951
Abce1	0.105028	0	-0.254153	0.540208	-0.343682	1.77152
Abcf1	-0.292694	-0.746571	0	0	-0.384719	0.883499
Abcf3	0	-0.885216	-0.41184	0.359386	-0.393249	1.10633
Abcg1	-0.587703	-0.178965	-0.730822	0.94647	0.528937	0.340747
Abcg4	-2.58958	-3.89371	-1.68662	-0.202322	-4.15367	1.70532
Abcg5	0	0	0	0	0	0
Abcg8	0	0	0	0	0	0
Abhd1	-0.260593	-0.67813	-0.188188	0	-0.45403	0.213347
Abhd10	-0.0356265	-0.0703131	-0.300347	-0.0689761	-0.0613136	0.174542
Abhd11	-0.151901	-0.0258201	-0.259613	-0.222916	-0.189978	0.805585
Abhd12	-0.569471	-0.371933	-0.121157	0	-0.223413	0
Abhd12b	0	0	0	0	0	0
Abhd13	-0.783405	-0.329776	-0.124887	0.0294729	-0.906164	0.839683
Abhd14a	0	-0.0174102	0.134672	-0.965267	0.0678546	0.6655
Abhd14b	0	-0.128912	0	0	0	-0.659374
Abhd15	-0.352675	-1.35396	-1.08098	1.50814	-0.140635	-0.999228
Abhd16a	0	-0.0228947	0.0765476	0	-0.475169	0
Abhd16b	0	1.27021	0	0	0	-0.147935
Abhd17a	0	0.660444	0.126732	0.422717	0.324415	-0.0139646
Abhd17b	0	0.377639	0	0	-0.133036	0.43619
Abhd17c	0	0.282602	0	1.19029	-0.110045	0
Abhd18	0	-0.545511	-0.0682874	0.221953	0	1.19557
Abhd2	-0.40995	0.226955	0	0.147678	-0.425304	-0.224472
Abhd3	0	0	0	0	0	0
Abhd4	0	1.0195	0	0	0.320688	-0.022925
Abhd5	0.203365	0.0767845	-0.206316	-0.670046	-1.10508	1.28048
Abhd6	-0.462978	-0.0553117	-0.0752769	-0.233014	0	0
Abhd8	0	-0.308444	0.18531	0	-0.380147	0.0198797
Abi1	-0.385386	0.289782	-0.183309	-0.190814	-0.267193	0.785908
Abi2	-0.50241	0.336791	-0.130944	0.124207	0.279408	0
Abi3	-0.97687	-1.50973	-0.572523	-0.30632	-1.92024	1.17946
Abitram	0	0	0	0.000564421	0	0.286015
Abl1	-0.0925	-0.562562	0	0.51431	-0.133648	0
Abl2	-0.159717	-0.792718	-0.284456	0	-0.629311	1.27372
Ablim1	-0.0595648	-0.0998992	-0.961935	1.24945	1.40548	0.56593
Ablim2	0	-1.59421	0	0	-0.784397	0
Ablim3	0	0	0	0	0	0
Abr	-1.16352	-0.949244	-0.191626	-1.04488	-0.985904	0.485029
Abra	0	0	0	0	0	0
Abracl	-0.133975	1.32484	-0.471844	0	0.598265	0
Abraxas1	-0.0846502	0.064803	-0.392188	0.133307	1.38147	0.492359
Abraxas2	-0.745315	0.248083	-0.614151	-0.00351984	-0.190787	0.729447
Abt1	0.060889	0	0	0.594022	0.356962	1.03939
Abtb1	0.0606756	2.26084	0.374982	1.41152	1.36047	-0.347979
Abtb2	-0.249034	-0.784577	-0.953668	0.293328	0	0.173775
Acaa2	0.320698	-0.207667	-0.256501	0	-0.527375	0.485454
Acaca	0.04199	-0.189026	-0.408995	0	-0.686533	0.761163
Acacb	-0.0480351	-0.423622	-0.137143	0.649245	0	-0.0915098
Acad10	0.446817	0	-0.16156	0	0	0.180096
Acad11	0.371819	1.17489	0.149247	0.257124	0.58218	0
Acad8	0.342725	0	-0.332675	0.256824	0	0.355513
Acad9	0.00577467	-0.0332093	0	0.0754971	-0.359695	0.823072
Acadl	-0.21447	0.134392	-0.016666	-0.603611	-0.362235	0.689728
Acadm	0.139413	-0.174707	-0.19008	0.70724	-0.257437	0.665574
Acads	0	-0.354472	0.0681044	0.815066	-0.366149	-0.164659
Acadsb	0	0.627686	-0.0148668	0	0	0
Acadvl	0.0029389	0	-0.0147409	0.00134626	0	0.618943
Acan	0	0	0	0	0	0
Acap1	-0.230669	-1.52395	-1.69878	1.19014	0.0100825	0.272526
Acap2	-0.379656	-0.109796	-0.410601	-0.153629	-0.572677	0.690818
Acap3	0	-0.918155	-0.207593	-0.13009	-1.17606	0.194325
Acat1	0.308298	-0.189007	-0.321148	0.379406	0	0.965985
Acbd3	0.105576	-0.0190091	-0.032303	0.200659	-0.339826	1.44852
Acbd4	0	0	0.111475	0.431961	0	0
Acbd5	-0.336608	0.0159955	-0.366125	0.264716	0.19567	0.687091
Acbd6	0	-0.146853	0	0	0.129206	0.241339
Acbd7	0	0	0	0	0	0
Accs	0.175996	-0.323535	-1.00638	0	-0.269304	0.34712
Acd	-0.118147	-0.659909	0	0	-0.0154979	1.18766
Ace2	0	0	0	0	0	0
Acer1	0	0	0	0	0	0
Acer2	0.685521	2.9061	0.0241221	1.20302	1.14023	-0.0938585
Acer3	-0.47097	0	0	-1.53625	-1.12999	1.90619
Ache	0	2.29899	0.972199	0.268037	1.07221	-0.476047
Acin1	-0.186726	-0.911576	-0.435561	0.0765123	-0.432501	0.991248
Ackr1	-0.0556477	-2.32714	0	-1.8682	-1.26264	0
Ackr2	0	0	0	0	0	0
Ackr3	0.93979	0	0	1.3437	0	0.531012
Ackr4	1.76115	0.117381	-0.019735	0.340648	-1.14455	1.44366
Acly	-0.012316	-0.356562	0	0.160172	-0.374131	0.710436
Acmsd	0	0.229184	0	0	0	0
Aco1	0	0	-0.0312642	-0.417058	-0.662719	0.882823
Aco2	-0.121676	-0.395359	0	0	-0.0989262	0.154018
Acod1	-4.32991	-5.35367	0	-4.39458	-1.39022	0
Acot11	0.400692	-0.791387	-0.185735	-0.589576	-1.15131	0.633982
Acot12	0	0	0	0	0	0
Acot13	0.178561	0	0	-0.0863763	0	0.599173
Acot4	0	0	0	0	0	0
Acot7	-0.109713	1.0537	0.119175	0.87996	0.186098	0
Acot8	-0.251341	-0.0718378	0	0	0	-0.347764
Acot9	0	-0.118389	-0.259314	0.109349	-0.618007	1.42317
Acox1	-0.4789	-0.5161	0	0	-0.927289	1.0893
Acox2	0	0.312166	0	0	0	0
Acox3	0	0	0	0.5932	0	0
Acoxl	0.18127	0	0	0	0	0
Acp1	-0.0283046	0.274277	-0.465764	0	0	0.592762
Acp2	-1.42719	-1.03897	-0.186622	-1.23224	-1.29703	0
Acp3	-0.859033	0.365767	-0.152324	-2.01422	-0.613855	0.0724879
Acp4	0	-0.967288	0	0	0	0
Acp5	0.0333298	-0.216941	0	0.667354	-0.879586	0.544578
Acp6	-0.193599	-2.07283	-0.834856	1.18265	-0.507522	1.52955
Acp7	1.02836	-2.96119	-1.08098	2.25019	-0.814501	-2.48869
Acr	0	0	0	0	0	0
Acsbg1	-0.0811132	-0.183579	0	0	0.00710776	1.16871
Acsf2	-0.755534	-1.29596	-0.580274	1.33291	0.0669262	-0.0128024
Acsf3	0	-0.359871	-0.133487	0	-0.539084	0.0917146
Acsl1	0	0.013441	-0.229767	-0.0219918	-0.378524	0.305418
Acsl3	-0.0379941	-1.09575	-1.05671	1.11133	0.381504	2.8046
Acsl4	-0.24983	0.0779652	0	0	-0.99899	1.2979
Acsl5	-0.101836	0.111278	0	-0.219769	-0.630357	0.293277
Acsl6	0	1.34645	0	0	0	0
Acsm1	0	1.3894	0	0	0	0
Acsm3	0	1.24302	0	0	0	-0.361321
Acsm4	0	0	0	0	0	0
Acsm5	0	2.05054	0	0	0.198815	0
Acss1	-0.0118286	-0.209143	-0.606962	1.25647	0.56936	0.0840199
Acss2	0.0927428	1.18844	0	0	0	0
Acss3	0	0.229184	0	0	0	0
Acta1	0	0	0	0	0.094454	0
Acta2	0.932208	0	0	0.884914	-0.148851	0.768498
Actb	-0.449478	1.35099	0.322206	0.114675	0.372883	-0.0473321
Actbl2	0	0	0	0	0	0
Actc1	0	0	0	0	0.198815	0
Actg1	-0.433375	0.932549	0.347858	-0.0868072	-0.0715269	-0.432053
Actg2	0	3.51126	0.187219	0.603482	0.833794	-0.58803
Actl10	0	0	0	0	0	0
Actl6a	-0.18086	-0.373929	-0.372467	-0.155452	-0.410472	0.648719
Actl6b	0	0	0	0	0	0
Actl7a	0	0	0	0	0	0
Actl7b	0	0	0	0	0	0
Actl9	0	0	0	0	0	0
Actn1	0.200852	2.33901	0.599525	1.61786	1.11661	-0.309629
Actn2	0	0	0	0	0.432177	0
Actn3	0	0	0	0	0	0
Actn4	-0.18439	-0.338762	-0.0644305	0.0896058	-0.393072	0.788306
Actr10	0.443654	0.500054	-0.138642	0.164765	-0.238932	0.673186
Actr1a	-0.285017	-0.204742	-0.0901272	-0.116775	-0.505957	0.325112
Actr1b	0.0844698	-0.777651	-0.084769	0.371922	-0.315668	1.03609
Actr2	-0.497494	0.387671	-0.171177	-0.00523187	-0.169306	1.01361
Actr3	-0.708338	0.0381926	-0.162968	-0.134538	-0.0891221	0.463038
Actr3b	0	0.778448	0	0	0.385764	-0.69969
Actr5	-0.0884087	-0.427361	0	0	-0.241661	0.324185
Actr6	-0.125288	-0.0253849	-0.00192675	0	-0.317423	0.535108
Actr8	-0.0565228	-0.395968	0	0.0472866	0	0.293977
Actrt1	0	0	0	0	0	0
Actrt2	0	0	0	0	0	0
Actrt3	0	0	0	0	0	0
Acvr1	0	0.00467658	0	0	-0.562173	0.438256
Acvr1b	0.516212	0	0	0	-1.09759	1.18531
Acvr1c	0	-0.140548	0	0.0965619	0.996178	0.557247
Acvr2a	0.0442586	-0.0906662	-0.0151331	0.50168	0	0.685783
Acvr2b	0	0	0	0	-0.256835	0
Acvrl1	-1.31802	-0.873855	0	-1.4571	0	0.586756
Acy1	0	0	0	-0.0371067	0	1.08576
Acy3	0.200287	-0.364363	0	0	-0.454092	0
Acyp1	0	0.235589	0	1.99199	0	0
Acyp2	0.106392	1.11309	0	-0.999296	0	0.338307
Ada	0.501031	-0.135082	0	0.476637	0	0.281134
Adad1	0	0	0	0	0	0
Adad2	0	0	0	0	0	0
Adal	-0.0763358	-0.297119	-0.270438	0.844222	0.136727	0.986636
Adam10	-0.218815	1.12029	0.0550468	0	0.107471	0.421406
Adam11	0	0	0	0	0	0
Adam12	0	0	0	0.336951	0	0
Adam15	1.17882	0.406745	0.211282	0.206754	0	1.06663
Adam17	-0.4069	-0.173995	0.399291	-0.463225	-0.878712	1.76213
Adam19	0	-0.174904	-0.738102	1.63255	1.34218	0.64904
Adam21	0	0	0	0	0	0
Adam22	0	0	0	0	0	-0.537377
Adam23	0	0	0	0	0	0
Adam28	0.204125	-2.90802	0	-1.3627	-1.18527	0
Adam29	0	0	0	0	0	0
Adam30	0	-0.0462839	0	0	-0.689615	0.659095
Adam33	-0.826878	-1.29814	0	0	-1.39758	0.237112
Adam8	-0.234991	-2.04991	-0.170849	-0.676854	-2.68613	1.34512
Adam9	-0.0418706	-0.22469	-0.147162	-0.944518	-1.9708	1.03423
Adamts1	0	-0.188351	0	0.435189	0	-1.47687
Adamts10	0	-0.996124	-0.665818	1.19018	0.28869	0.247127
Adamts12	0.918856	0	0	0.0774949	0	0
Adamts13	0	0	0	0	0	0
Adamts14	-1.23558	-3.95346	-1.99302	-1.38453	-2.87542	-1.56328
Adamts15	0	0	0	0	0	0
Adamts16	0	0	0	0	0	0
Adamts17	0	0	0	0	0	0
Adamts18	0	0	0	0	0	0
Adamts19	0	0	0	0	0	0
Adamts2	-0.424117	-1.10142	-0.381207	-1.49504	-1.99394	0.856061
Adamts20	0	0	0	0	0	0
Adamts3	0	-0.335774	-0.127391	0	-0.133504	0
Adamts4	0	0	0	0	0	0
Adamts5	0	0	0	0	0	0
Adamts6	0	0	-0.413125	0.533773	-0.0334655	0.814346
Adamts7	0.18127	0	0	0.322932	0	0
Adamts8	0	0	0	0	0	0
Adamts9	0	0.902289	0	0	0	0
Adamtsl1	0	0.262397	0	0	0	0
Adamtsl2	0	0	0	0	0	0
Adamtsl3	0	0	0	0	0	0
Adamtsl4	0.637234	-0.278745	0	-0.716432	-1.27401	0.919631
Adamtsl5	0	0	0	0	0	0
Adap1	-0.901224	-0.545294	0	-1.05592	-1.16823	0.948589
Adap2	-0.295917	0	-0.01021	0	-1.28028	0
Adar	-2.00962	-2.3157	-0.622725	-1.65771	-1.98295	0.972577
Adarb1	0	0	0	0	0	0.797207
Adarb2	0	0	0	0	0	0
Adat1	-0.408343	-0.760514	-0.376132	0.0301013	0.270043	0.333862
Adat2	0.389278	0	0	0.560349	0	0.935668
Adat3	-0.547395	-0.695915	0	0.402592	0	0
Adck1	-0.246373	-0.509546	0	0	-0.205937	0.681003
Adck2	-0.595796	-0.479951	-0.132769	-0.768593	-0.522826	0
Adck5	0	-1.03181	-0.477734	0	-0.272867	0.798484
Adcy1	0.384762	-1.96526	-1.39227	1.96731	-0.581599	-0.446555
Adcy10	-0.507741	0	0	0	0	0
Adcy2	0	1.30804	0	0	0.663176	-0.249752
Adcy3	0	0	0	0.0958869	2.58225	1.45499
Adcy4	0.516868	0	-0.405591	-0.197171	-1.65533	0.743116
Adcy5	0	0	0	2.23027	0	0
Adcy6	1.31761	0.770125	0	0.593425	0.748596	-0.096123
Adcy7	-0.247743	-1.661	-0.294517	0.622864	-0.560238	0.577111
Adcy8	0	0	0	0	0	0
Adcy9	0	0.28133	0.276532	-0.581021	-0.181278	0
Adcyap1	0	0	0	0	0	0
Adcyap1r1	0	0	0	0	0	0
Add1	0.0250379	0.269878	0	0.647152	0.175965	0.0427207
Add2	0	4.67746	0	0	2.5917	0
Add3	0.00213059	0.679417	-0.0842312	0.0125624	-0.0708376	0.687894
Adgb	0.146832	0	0	0	0	0
Adgra1	0	0	0	0	0	0
Adgra2	0	0	0	0.59918	0	0
Adgra3	0.911231	0.437039	0.129444	0	0	1.05062
Adgrb1	0	0	0	0	0	0
Adgrb2	0	0	0	0	0	0
Adgrb3	0	0	0	0	0	0
Adgrd1	1.43532	1.45571	0	4.03586	1.29093	0.236868
Adgre1	0.81307	0.329386	0.000174034	0.0077918	-0.824442	1.61574
Adgre3	-0.0971194	0.212888	-0.169457	-0.369235	-0.865358	1.57334
Adgre5	-0.707377	-0.507108	-0.447363	-0.337658	-0.651065	0.795435
Adgrf1	0	0	0	0	0	0
Adgrf2	0	1.36595	0	0	0	0.248086
Adgrf3	0	0	0	1.85084	-0.256835	0
Adgrf4	0	0	0	0	0	0
Adgrf5	0.316406	0	0	0.910146	1.27243	0.8094
Adgrg1	-0.445848	2.10003	0.773051	0.744554	0.913011	-0.554864
Adgrg2	0.18127	1.60612	0	3.30195	0.934037	0
Adgrg3	0	0	0	0	0	0
Adgrg4	0	0	0	0	0	0
Adgrg5	-1.76057	-2.5014	-1.46094	-0.696153	-1.36418	0.204879
Adgrg6	1.14207	0.563021	0	0	-0.640304	1.10687
Adgrg7	0	0	0	0	0	0
Adgrl1	-0.448899	-0.838025	-1.25794	0.41917	0.294544	0.924248
Adgrl2	1.60215	0	0.165726	0.763674	-0.588775	0.697161
Adgrl3	0	0	0	0	0	0
Adgrl4	0	0.601499	0	-0.0898315	0	0.444483
Adgrv1	0	0	0	0	0	0
Adh7	0	0	0	0	0	0
Adhfe1	0	0	0	0	0	0
Adi1	0.454579	0	0	0.78613	0.0719456	0
Adig	0	0	0	0	0	0
Adipoq	0	0	0	0	0	0
Adipor1	-0.151202	1.615	0.111378	0.0202312	0.712573	0
Adipor2	0.160127	0	0	-0.28569	-0.832978	1.30439
Adk	0.641266	0	-0.087384	1.04049	0.121233	0.388256
Adm	0	0	0	0.148961	0	0
Adm2	0	0	0	0	0	0
Adnp2	-0.88104	-0.0178363	0	-0.333762	-0.831172	0.42067
Ado	0.182322	0	0	-0.744652	-0.261603	0.860862
Adora1	0	0	0	0	0	0
Adora2a	-0.791373	0	-0.0661824	0	0	-0.21752
Adora2b	0.519906	2.05736	0	-0.503966	-0.502051	0.32511
Adpgk	-0.0549263	-0.200528	-0.0243081	-0.0376651	-0.511618	0.674739
Adprh	0.0218095	0.8711	0.0485077	0.174645	0.503135	-0.110526
Adprm	0	0	-0.607245	0.720268	0	1.01325
Adprs	0.0226754	-0.288491	0	0.179596	-0.0667256	0.767994
Adra1a	0	0	0	0	0	0
Adra1b	0	0	0	0	0	0
Adra1d	0	0	0	0	0	0
Adra2a	0	0	0	0	0	0
Adra2b	0	0	0	0	0	0
Adra2c	0	0	0	0	0	0
Adrb1	1.01697	-0.827211	0.522242	1.70916	0.402884	-0.314246
Adrb2	-0.620121	-0.358269	-1.08192	0.431082	0	1.44421
Adrb3	0	0	0	0	0	0
Adrm1	-0.0927267	-0.45664	0	-0.00441123	-0.421948	0.679317
Adsl	0	-0.237591	-0.501743	0	0	0.203363
Adss1	0	0	0	0	0	0.32511
Adss2	0	0.200118	-0.295398	-0.383289	-0.220197	1.07051
Adtrp	0	0	0	0	0	0.659095
Aebp1	1.55129	0.0169964	-0.236909	1.72578	-0.117517	0.360628
Aebp2	0.627671	0.453566	0.00906915	0.455788	0	1.36559
Aen	0.644324	0	0.431621	-0.202254	-0.510724	0.348841
Afap1	1.64282	0.0855829	0	2.04088	0	0.513363
Afap1l1	0.138806	-1.88251	0	1.79394	-0.510209	-1.32543
Afap1l2	0.224886	-0.473351	0	0.569846	-0.543408	0
Afdn	0.309333	0	-0.219678	0.146488	-0.788535	0.484183
Aff1	0.00818973	-0.182913	-0.0984374	0.37648	-0.437494	0.890243
Aff2	0	0	0	0	0	0
Aff3	0	-0.199804	0	2.25705	0.563643	1.40601
Aff4	0.263607	0.0262244	0.481575	0.811362	-0.582531	2.3851
Afg1l	0	-0.636829	0	0	-0.0838492	0.248482
Afg3l2	-0.0240398	-0.464977	-0.122834	0	-0.167152	0.599725
Afm	0	0.505433	0	0	0	0
Afmid	-0.441067	0.213868	0	0	0	0
Aftph	-0.547816	0.455421	-0.0459639	-0.268446	-0.231365	0.463631
Aga	0.531403	0.136412	-0.112447	0.0540027	-0.619319	0.466344
Agap1	0.395372	0.0228698	0.0853017	0	-0.310451	0.787263
Agap2	-0.906538	-1.22759	-0.281367	0.372132	0.126782	0
Agap3	-0.0458063	-0.310145	0	0	-0.337946	0.910967
Agbl1	0	0	0	0	0	0
Agbl2	0	0	0	0	0	0.0296945
Agbl3	0	-0.0307409	-0.00651823	0	-0.716378	0
Agbl5	0.00828458	2.5542	0.14522	0.559571	1.14565	-0.433063
Ager	0	-0.149743	0	0	0	0
Agfg1	-0.387022	-0.012063	0	0	-0.448943	0.450425
Agfg2	0.120115	-0.29353	-0.212091	0	-0.649201	0.732397
Aggf1	-0.427289	0	-0.313733	-0.0736849	0	0.59515
Agk	0	-0.16967	-0.436319	0.490647	0.0862051	0
Agl	0	0.542088	0	0.0747005	-0.0744157	0
Agmat	0	0	0	0	0	0
Agmo	0	0	0	0	0	0
2002-08-01	-0.209189	-0.37276	0	0.0234537	0.341719	1.26372
2003-08-01	0	-0.0558331	-0.234557	0	-0.374748	1.62694
2004-08-01	-0.278707	0	0	0	0	0.718833
Agpat1	-0.184309	0.787104	0.282774	0.0910755	0.397178	-0.231519
Agpat2	-0.485832	-0.326893	0	0	0	0
Agpat3	-1.80207	0	0	-0.369064	0	0.132073
Agpat4	-0.43174	-0.3137	-0.299349	-0.437239	-1.16213	0.632343
Agpat5	-0.429937	0	-0.122143	-0.393961	-0.410551	0.186416
Agps	-0.00914212	0	-0.363786	0	-0.680666	0.920191
Agr2	0	0	0	0	0	0
Agr3	0	0.115635	0	0	0	0
Agrn	-2.18293	-2.60858	-1.33454	-1.59954	-2.25305	-0.0779795
Agt	0	1.5225	0	0	0	0
Agtpbp1	0	0	-0.382399	0	-0.254723	1.34912
Agtr1	0	0	0	-0.594056	0	0
Agtr2	0	0	0	0	0.633957	0
Agxt	0	0	0	0	0	0
Agxt2	0	0	0	0	0	0
Ahctf1	-0.549663	-0.405416	-0.684383	-0.145013	-0.21768	1.09558
Ahcy	0	-0.216517	0	0	0	0.734035
Ahcyl1	-0.152919	0.0497626	-0.214924	0.103992	-0.221208	0.52845
Ahcyl2	0	-0.00362886	0	0.459082	0.270862	0.642194
Ahdc1	-0.684334	-0.672624	0	0	0	-1.01903
Ahi1	-0.147073	-0.840627	-0.435346	0.271544	0	0.730426
Ahnak	-0.712774	-0.399805	-0.570308	-1.87961	-1.18347	0.586598
Ahnak2	-0.588055	-1.25945	0	-2.43396	-1.33565	0
Ahr	-0.964964	-0.646958	0	-1.15287	-0.385637	1.28212
Ahrr	0	0.505433	0	0	0	0
Ahsa1	-0.214457	-0.0295614	-0.0720706	0.0514165	0	0.397309
Ahsg	0	3.43429	0	0	1.6137	-0.361321
Aicda	-6.18445	-3.79348	-1.91655	-6.66953	-6.34	0
Aida	-1.14703	0.28385	-0.217933	-0.850327	-0.599321	0.616682
Aif1	-1.22513	-0.735446	0	-1.17899	-1.47877	1.43465
Aif1l	-0.333591	-0.644926	-1.05583	-1.30704	0	0
Aifm1	0	-0.236634	-0.401038	-0.124055	-0.273945	0.958523
Aifm2	1.44357	0	0	0.827029	-0.646103	0.365595
Aifm3	0	0	0	0	0	0
Aig1	-0.399996	2.85475	0.0836027	0.286079	0.994897	-0.233293
Aim2	0	-0.103724	-0.442592	-0.815148	-1.36036	0.825121
Aimp1	-0.0651435	-0.144494	-0.105208	-0.0890555	-0.529796	0.857311
Aimp2	-0.0656951	-0.152278	-0.0925794	0	-0.717193	0
Aipl1	0	0	0	0	0	0
Aire	-2.86506	-2.18048	0	-0.630297	-1.57216	-0.000263217
Ajap1	0	0.940575	0	0	0	0
Ajm1	0	0	0	0	0	0
Ajuba	0	0	0	0	0	0.122555
Ak1	0	0	0	0	0.0538348	0
Ak2	-0.276162	0	0	-0.125996	-0.245426	0.495883
Ak3	0.369866	0.495941	-0.0261212	0	-0.0650298	0.422281
Ak4	0	0	0	0	1.08278	0
Ak5	0	0	0	0	0	0
Ak6	-0.329414	0.289849	-0.332041	0.0549889	0	0
Ak7	0	0	0	0	0	0
Ak8	0	0	0	0.322932	0	0
Ak9	0	0	0	0	0	0
Akain1	0	0	0	0	0	0
Akap1	0.168984	-0.0367471	-0.533076	0.0196237	0.0572098	0
Akap10	-0.30755	-0.181799	-0.587347	0	-0.44104	0.863133
Akap11	0.190013	-0.0471441	-0.4306	-0.0406547	-0.376025	0.609289
Akap12	-0.62008	0.137821	0.172135	0.0935017	0.28698	0
Akap13	-0.181969	-0.325707	-0.368788	0.0793535	-0.0907547	0.614813
Akap14	0	0	0	0	0	0
Akap17a	0	0	0.328259	0	0	0
Akap3	-0.799021	0.034459	-0.0931163	-0.184387	0	0
Akap4	0	0	0	0	0	0
Akap5	0	-0.946628	0	0.782037	-0.310286	-0.916639
Akap6	0	-0.834186	0	0.679313	0	0
Akap7	0.0540933	0.320809	-0.00394358	0	-0.587034	1.09585
Akap8	-0.149348	-0.789762	-0.328001	0.472766	-0.450648	1.37353
Akap8l	0	-0.151578	-0.153602	0.599194	0	0.711294
Akip1	-0.4283	0.0101131	0	-0.485557	0	0.545008
Akirin1	-0.0400901	0.931553	0.192097	0.123733	0.133756	0.369293
Akirin2	-0.256862	0.139999	-0.0292619	0	-0.28298	0.753631
Akna	-1.34416	-1.29243	-0.609383	0.0558869	-0.379551	0
Aknad1	0	0	0	0	0	0
Akr1a1	-0.262299	-0.113696	-0.0841552	-0.50145	-0.51556	0.682356
Akr1b10	0	3.03932	0	0	0	0
Akr1d1	0	1.13306	0	0.59918	1.65633	0
Akr1e2	0	0	0	0	0	0
Akt1	0	-0.104013	0.171042	-0.102548	-0.51031	1.13268
Akt1s1	0	-0.318891	-0.194313	0	-0.0819025	0.620542
Akt2	-0.118632	1.17638	0.256885	0.304389	0.461843	-0.552929
Akt3	0	2.16467	0.0375037	0.682712	1.20593	0
Alad	0.152569	-0.819528	0	0.344038	0	0.510737
Alas1	0	-0.496719	0	0	-0.633287	0.400087
Alas2	0	8.10766	0	0.541429	6.43826	-4.68052
Alb	-0.0133947	5.70452	1.25598	-1.42803	1.77616	-2.05194
Alcam	0	0	0	0.452058	-0.352016	1.44097
Aldh16a1	-0.449995	-0.589474	0.457659	-0.336454	-0.386399	0
Aldh18a1	0.0737028	-0.505612	-0.447425	0.406933	0.112297	0.189953
Aldh1a2	0	2.22404	-0.0467533	0.581884	0.753591	0.328585
Aldh1a3	0	3.24983	0.171685	0.749649	0.951162	-0.277421
Aldh1b1	0	-0.507363	0	0	-0.553331	0
Aldh1l1	0	0.738794	-0.127391	0	0	0
Aldh1l2	0	0	0	0	0	0
Aldh2	1.07983	0.246664	0.0282919	0	-0.326808	0.615654
Aldh3a1	0	0	0	0	0	0
Aldh3a2	-0.0335787	-0.16843	-0.460556	0	0.285798	0.93264
Aldh3b1	0.683316	-0.14953	0	-0.853477	-0.98476	0.943173
Aldh4a1	0.0925152	-0.7657	0	-0.869447	0	0.462533
Aldh5a1	0	0	0	1.90845	1.01919	0.222091
Aldh6a1	0	0.751816	0	-0.673394	-0.000430299	0.247586
Aldh7a1	0	0.307703	0	0.710691	1.11848	0
Aldh8a1	0	0.505433	0	0	0	0
Aldh9a1	-0.365013	-0.213407	-2.1981e-05	-0.264225	-0.182073	0.774157
Aldoa	0	0.505422	0.220694	-0.0328554	-0.40133	0.0604126
Aldob	0.260282	2.82558	0	0.453144	1.60563	-0.036008
Aldoc	0	0	0	0	0	0
Alg1	-0.61611	-1.16583	-0.226008	0.00168697	-0.716186	1.00655
Alg11	0.10202	0.296053	-0.47864	0.361684	0	1.81884
Alg12	0	-0.294033	-0.112524	-0.231683	-0.279544	0.480106
Alg13	0	0	-0.0774408	0	0	0.755183
Alg2	-0.0737608	0	0	0.311221	0	0.994848
Alg3	0	-0.316858	0	0	-0.287222	0.0844072
Alg5	0	-0.262743	-0.31118	0	-0.251507	0.417092
Alg6	-0.234557	0	-0.304199	0	-0.426506	0.58033
Alg8	0	-0.463522	0	0	-0.228197	0
Alg9	0.0434587	-0.0288111	-0.2941	0.17528	0	0.342208
Alk	0	0	0	0	0	0
Alkal1	0	0	0	0	0	0
Alkal2	0	0	0	0	0	0
Alkbh1	0.490012	-0.223729	-0.0437848	0.544075	0	1.92171
Alkbh2	0	-0.337262	0	0.184404	0	0.437
Alkbh3	0	-0.297907	-0.436077	-0.356205	-0.0205031	0
Alkbh4	0	-0.648618	0	0	-0.498875	0.505298
Alkbh5	-0.113367	0	0	0.183268	-0.0781016	0.891967
Alkbh6	0	-1.04683	0	0.462647	-0.149362	0.87624
Alkbh7	0	-0.581364	0	0.344832	-0.0518161	0
Alkbh8	-0.0788904	0	-0.194649	0.126759	0.0299659	0.795684
Allc	0	0	0	0	0	0
Alms1	0.378901	-0.323753	-0.0823613	0.364074	-0.225687	0.615196
Alox12b	0	0	0	0	0	0
Alox15b	0	0	0	0	0	0
Alox5	0	0.382045	0	0.821	0	0.147787
Aloxe3	0	0	0	0	0	0
Alpi	0	0	0	0	0	0
Alpk1	-0.0224811	-1.00476	-0.291195	-0.568317	-1.95276	1.55936
Alpk2	-2.5543	-1.25374	0	-0.252845	-0.358681	0.874682
Alpk3	0	-0.863698	0	-1.85451	0	0
Alpl	0	0	0	0	1.29928	0.248086
Als2	-0.29049	-0.415073	0	0	-0.771049	0.908054
Als2cl	0	-0.272942	0	0.692475	-0.618821	-0.930243
Alx1	0	0	0	0	0	0
Alx3	0	0	0	0	0	0
Alx4	0	0	0	0	0	0
Alyref	-0.0713566	-0.421627	-0.113195	-0.0152287	-0.0644104	1.09705
Amacr	0	0	0	0	0	0
Ambn	0	0	0	0	0	0
Ambra1	-0.622594	-0.808974	-0.451	-0.122646	-0.687983	1.0711
Amd1	0	2.09395	0.191426	0.809688	0.790344	-0.00547197
Amdhd1	0	1.95913	0	0	1.74392	0
Amdhd2	-0.579789	-0.695216	-0.00727243	-0.584561	-0.770965	0.464728
Amelx	0	0	0	0	0	0
Amer1	-0.186088	0	-0.354376	-0.763009	-0.154087	0.199682
Amer2	0	0	0	0	0	0
Amer3	0	0	0	0	0	0
Amfr	0	0.451377	0	0.223162	0.107769	0.203383
Amh	0	0	0	0	0	0
Amhr2	0	0	0	0	0	0
Amigo1	0	-2.49903	0	0.510653	-0.388628	-0.119627
Amigo2	0	3.00052	0.0722494	0.0237964	0.694015	-0.664611
Amigo3	-0.098103	-1.32552	0	0	-1.01129	0.597099
Ammecr1	-0.0435608	0	-0.0440471	0.295135	-0.352536	1.15272
Ammecr1l	0	-0.0896949	0	0	-0.504367	0.257684
Amn	0	0	0	0	0	0
Amn1	-1.16416	-0.131568	0	-0.487665	-0.11338	1.01253
Amot	0	0.0145718	0	0.886125	0	-0.257892
Amotl1	0.501826	2.55229	0.111705	0.807531	0.786894	-0.361354
Amotl2	0.857405	-0.481845	0	1.04434	0.264487	-0.699822
Ampd1	0	0	0	0	0	0
Ampd2	-0.0204446	-0.319121	0	-0.151486	-0.557472	0.467029
Ampd3	0	-1.35007	-0.00472755	1.27159	-0.544026	0
Amph	0	0	0	0	0	0
Amt	0	0	0	0	0	0
Amtn	0	0	0	0	0	0
Amz1	-0.29884	-0.40183	0	0	0	-0.913113
Amz2	-0.398087	1.64896	-0.0658706	0.222237	0.792373	0
Anapc1	0	-0.268637	-0.152916	0.0115497	-0.386562	0.586933
Anapc10	-0.327429	0	0	0	-0.158686	0.349302
Anapc11	-0.0290326	0.567571	0	0.288625	0.388765	-0.189954
Anapc13	0	-0.031546	-0.515114	0	-0.283667	0
Anapc15	-0.424378	-0.053743	0	-0.206659	0	0.0830781
Anapc16	0	1.80132	-0.0877415	0.395567	0.917533	-0.322353
Anapc2	0	-0.688105	-0.0409157	0.135495	-0.330043	0.852622
Anapc4	-0.256636	-0.340777	-0.818581	0	-0.249009	0.950374
Anapc5	0.242706	0.912939	-0.0770059	0.596074	0.595751	0.0754463
Anapc7	-0.312743	-0.700562	-0.662493	0.402125	-0.315555	0.898776
Ang	0.274975	0.523167	0	0	-0.314121	0.154432
Angel1	0	0	-0.206708	0.414209	0.0259373	-0.931308
Angel2	0	-0.247816	0	0	0	1.1201
Angpt1	0.468215	2.79582	0	0.0949492	0.893509	-0.371178
Angpt2	0	0	0	0	0	0
Angpt4	0	0	0	0	0	0
Angptl1	-2.13657	0	0	0	0	0
Angptl2	0	-0.277813	0	0	-0.283485	1.03141
Angptl3	0	0	0	0	0	0
Angptl4	1.19834	1.5687	1.25758	0	0	0.742077
Angptl5	0	0	0	0	0	0.321488
Angptl6	0	0	0	0	0	0
Angptl7	0	0	0	0	0	0
Angptl8	0	0	0	0	0	0
Ank1	0.184919	2.63948	0.342435	0.777515	1.09103	-0.339751
Ank2	0	0	0	0	0	0
Ank3	0	0	0	0	0.633957	0
Ankar	0	0	0	0	0	0
Ankdd1a	0	-0.438166	0	0.148961	-1.66797	0
Ankdd1b	0	0	0	0	0	0
Ankef1	0.523812	0.145578	-0.762703	0.36277	-1.38961	1.95879
Ankfn1	0	0	0	0	0	0
Ankfy1	-1.05963	-0.67298	-0.520749	-1.42674	-1.50294	0.509133
Ankh	-0.448859	0.120484	-0.404137	-0.487374	-0.172319	0.446495
Ankib1	0	-0.166108	-0.149992	0.168482	-0.271277	1.62357
Ankk1	0	0	0	0	0	0
Ankle1	-0.192915	-2.82802	-0.393029	-0.0498172	-0.965258	0
Ankle2	-0.166611	-0.44492	-0.445696	0.0189911	-0.598601	0.64376
Ankmy1	0	0	0	0	0	0
Ankmy2	-0.372823	-0.136093	0	-0.628181	-0.662555	0.093983
Ankra2	0	0.216677	0	0.112622	0	0
Ankrd1	0	0	0	0	0	0
Ankrd10	0	-0.675629	-0.486514	0.589348	-0.327589	0.392935
Ankrd11	-0.308148	-1.02804	-0.309606	0.037492	-0.762945	1.35819
Ankrd12	-0.570924	0	-0.0302082	-0.0901193	-0.328977	0.626357
Ankrd13a	-0.433835	-0.206943	0	-0.108043	-0.522959	1.01234
Ankrd13b	0	0	0	0	0	0.559373
Ankrd13c	-0.0505401	0.382347	-0.217528	0.297608	-0.119911	0.81929
Ankrd13d	-0.15539	-1.68404	-1.00092	-0.227142	-0.753217	0.204891
Ankrd16	-0.32071	-0.780473	-0.393029	0	-0.355539	0
Ankrd17	-0.267701	-0.539184	-0.134298	-0.0265419	-0.477581	1.1833
Ankrd2	0	0	0	0	0	0
Ankrd22	0	0	0	0	0	0
Ankrd23	0	-0.301586	-0.115348	0	-0.840224	1.1795
Ankrd24	0.0319245	-0.546056	0	0.59394	-0.158572	0
Ankrd27	-0.206718	-0.203469	-0.06548	0	-0.165333	0.10219
Ankrd28	0.688789	0	-0.296402	0.783292	0.0486451	1.159
Ankrd29	0.649595	0.959556	0	0.130585	-0.129448	1.35194
Ankrd30a	0.511157	0.000866599	-0.437942	0.870545	0.16245	0.620391
Ankrd31	0	0	0	0	0	0.668045
Ankrd33	0	0	0	0	0	0
Ankrd33b	-0.747186	-0.173563	0	2.56861	-1.57993	0
Ankrd34a	0	0	0	0	0	0
Ankrd34b	0	0	0	0	0	0
Ankrd34c	0	0	0	0	0	0
Ankrd35	-0.320061	-1.04307	-0.127391	0	-0.229088	0
Ankrd37	0	0	0	0.00878373	0	0
Ankrd39	0.082015	-0.157455	0	0	-0.554576	0
Ankrd40	-0.221262	0.0298794	-0.39651	-0.215244	-0.0028161	0.433483
Ankrd40cl	0	0	0	0	0	0
Ankrd42	0	0	0	0	0	0
Ankrd44	-0.454856	-0.656876	-0.238342	0.39825	-0.48658	1.14092
Ankrd45	0	0	0	0	0	0
Ankrd46	-0.178883	-0.116454	0	0	-0.366351	0.249906
Ankrd49	-0.224398	-0.328165	-0.169013	-0.0287357	-0.0554748	0.891975
Ankrd50	0	0.0764234	0	0	0	0
Ankrd52	0	-1.27559	-0.178936	0	-0.895583	0.743924
Ankrd53	0	0	0	0	0	0
Ankrd54	-0.485934	0.537197	0	0	0.34865	0
Ankrd55	-0.494738	0.530389	0	-1.49456	0	0.152901
Ankrd6	0	0	0	0	0	0.321488
Ankrd60	0	0	0	0	0	0
Ankrd61	0	0	0	0.322932	0	0
Ankrd63	0	0	0	0	0	0
Ankrd65	0	0	0	0	0	0
Ankrd66	0	0	0	0	0	0
Ankrd9	0	-0.724045	0	0	-0.911157	0
Anks1a	-0.0963796	-0.620832	0	-0.143291	-1.42536	0.478799
Anks1b	0	0	0	0	0	0
Anks3	-0.0485953	-1.30975	-1.16337	0	-0.117473	0.412265
Anks4b	0	0	0	0	0	0
Anks6	0.259566	-0.84025	-0.41465	1.21541	0	0.344285
Ankub1	0.241227	-0.704677	-0.331491	0.0249303	-1.26775	0.139654
Ankzf1	-0.423518	-1.37581	-0.860185	0.65944	-0.50049	1.33666
Anln	0	-1.40601	-0.288114	0	-1.99476	0.813391
Ano1	0	0	0	0	0.432177	0
Ano10	0.275573	0.214974	0.225087	-0.430894	-0.795768	0.0179969
Ano2	0	0	0	0	0	0
Ano3	0	0	0	0	0	0
Ano4	0	0	0	0	0	0
Ano5	0	0	0	0	0	0
Ano6	0.283041	0.370414	0.0650178	0	-0.611272	0.351796
Ano7	0.0751546	0	0	0.495998	0	0.266945
Ano8	-0.14047	-0.723156	-0.0696096	0	-0.225655	0
Ano9	0	-0.237476	0	0	0	0
Anp32a	-0.400516	0.0595277	0	-0.00696645	0.121412	0.602219
Anp32b	0.132899	-0.348348	-0.141255	0.323539	-0.274218	1.14313
Anp32e	0.0339994	-0.390358	0	0.548528	-0.123122	0.551549
Antkmt	0	-1.09085	-0.39237	0.688778	-0.101203	0
Antxr1	0.414632	1.89824	0	1.51266	0	0.444483
Antxr2	-0.430548	-0.480276	0	-0.77182	-0.402633	0.64467
Anxa1	-0.432962	0.00439648	-0.619067	-2.17029	-1.23654	1.30431
Anxa10	0	0	0	0	0	0
Anxa11	0.372839	0.126567	0.149084	0.144437	-0.552125	0.434684
Anxa13	0	0.229184	0	0	0	0
Anxa2	-0.629296	0.424688	-0.0682646	-1.55426	-0.48236	0.54896
Anxa3	0.0677182	1.31159	0.0186391	-0.00666018	0	0.122252
Anxa4	-0.591433	-0.118371	0.26663	-1.461	-0.756093	0.733691
Anxa5	-1.45546	-1.43661	0.334288	-1.29214	-1.16053	1.58693
Anxa6	-0.901574	-1.31883	-0.114298	0.419746	0.601642	0
Anxa7	0.0878573	0.155388	-0.318363	-0.104725	-0.435404	0.646362
Anxa9	0	0	0	0	0	0
Aoah	-0.250234	-0.489642	-0.118425	-0.132981	-1.14592	0.656147
Aopep	-0.306028	1.69519	0	0.329852	0.924037	-0.337847
Ap1ar	-0.218824	0	-0.410159	-0.0719956	0	0.449187
Ap1b1	-0.263366	-0.191432	0	0.0500662	-0.214897	0.191945
Ap1g1	-0.491932	-0.161945	-0.550525	-0.293225	-0.692736	0.36856
Ap1g2	-0.30616	-1.09157	-0.264493	0	-0.336379	0.905517
Ap1m1	-0.253171	-0.169761	0	0	-0.400491	0.381806
Ap1m2	0	0	0	0	0	0
Ap1s1	0	1.85046	0.187362	0.599671	0.886415	-0.470708
Ap1s2	-0.837303	1.05456	0.0448836	-0.615952	0	1.08522
Ap1s3	-2.32103	-0.683828	0	-0.96925	-1.22059	0.670249
Ap2a1	0	-0.400234	0.179901	0.351614	-0.441253	0.581173
Ap2a2	0	-0.136879	0.0223956	-0.66446	-0.556153	0.71736
Ap2b1	-0.0649207	0.338532	0	0	-0.196481	0.0664031
Ap2m1	-0.163458	1.27849	0.162958	0.318849	0.649927	-0.102463
Ap2s1	-0.105942	0.486081	0.151534	0	0	-0.108228
Ap3b1	-0.179499	-0.152503	-0.0965367	-0.404545	-0.457915	0.762819
Ap3b2	0	0	0	0	0	0
Ap3d1	-0.476196	-0.775082	0	-0.160533	-0.750523	0.536652
Ap3m1	-0.327911	0	-0.0535359	-0.6811	-0.246797	0.666599
Ap3m2	-1.65127	0	0	0	0	1.17641
Ap3s1	-0.0841436	0.667772	-0.0410159	-0.168892	0	1.22742
Ap4b1	-0.650686	-0.699089	-1.02374	0	-0.0952052	0.227925
Ap4e1	-0.0534254	-0.0393972	-0.479937	0	-0.693023	1.21088
Ap4m1	-0.829851	-0.449903	-0.49542	0	0	0.716627
Ap4s1	0	0.0413903	-0.05393	-0.746165	0	0
Ap5b1	-0.655917	-1.57339	0	-0.442522	-1.40467	0
Ap5m1	0	0.156457	-0.00636776	0	-0.0231987	0
Ap5s1	-0.141673	-0.136599	-0.474174	0.220374	0.0871615	0
Ap5z1	-0.237303	-0.992965	-0.0546876	0	-0.555007	0
Apaf1	-0.692417	0.115352	-0.396304	-0.41589	-0.246609	0
Apba1	-2.06247	-1.13756	0.135246	-1.54723	-2.13826	1.44603
Apba2	0.174276	0	0	1.63094	1.92354	1.36596
Apba3	-0.357224	-0.655831	0.337165	0	-0.320405	0
Apbb1	0	-0.325962	-0.13026	0.706346	0	0
Apbb2	0	0	0	0	0.446659	0.0294455
Apbb3	0.26504	-1.21624	-0.730562	0.293476	-0.365285	0.970381
Apc	0	-0.0840348	-0.244527	0.412046	-0.240772	0.954051
Apc2	0	0	0	0.322932	0	0
Apcdd1	0	0	0	0	0	0
Apcdd1l	0	0	0	0	0	0
Apcs	0	5.34568	0	0	0	0
Apeh	-0.267955	-0.761732	-0.234866	-0.0619152	-0.361723	0.0201206
Apela	0	0	0	0	0	0
Apex1	0	-0.13101	-0.380523	0	0.198927	0.787387
Apex2	-0.0277995	-0.230717	-0.543574	0.596676	0	0.21938
Aph1a	0	-0.277395	0	-0.520423	-0.569291	0.584672
Aph1b	-0.251432	-0.188757	0	-0.630948	-1.2562	0.67404
Api5	-0.33186	0	-0.176014	0.0991352	-0.332401	0.847287
Apln	0	0	0	0	0	0
Aplnr	0	0	0	0	0	0
Aplp1	0	0	0	0	0	0
Aplp2	-0.137171	-0.242656	0.232355	-0.050239	-0.448295	1.03509
Apoa1	0.749605	2.73231	0.399606	1.54114	1.37044	0.19615
Apoa2	0	1.67745	0	0	0.39404	0
Apoa4	0	0.940575	0	0	0	0
Apoa5	0	0.700657	0	0	0	0
Apob	0	3.24751	0.134992	0	0.198815	0
Apobec1	-4.1901	-2.01743	-0.452044	-4.26381	-3.01932	0
Apobec2	0	0	0	0.121509	0	-0.543227
Apobec4	0	0	0	0	0	0
Apobr	-0.600402	-1.03737	-0.25175	-0.779861	-1.34754	-0.0493433
Apoc1	0.184919	0.626156	0	-0.591692	0.139771	0.086029
Apoc2	0	0.940575	0	0	0	0
Apoc3	0	3.67994	0	0	0	0
Apoc4	0	1.5225	0	0.59918	0	0
Apod	0	0	0	0	0	0
Apoe	2.7575	0.640563	0	1.91514	0.264303	0.0575065
Apof	0	3.03932	0	0	0	0
Apoh	0.692809	4.87881	0	0	0.832456	0
Apold1	0.552396	0.246052	0.297671	0.0417363	-0.889725	1.45009
Apom	0	-0.597371	0	2.18151	0	0
Apoo	0	0.575324	-0.0913789	0.211473	0.0379009	0.288842
Apool	-0.0575456	0.25825	-0.470456	-0.109505	-0.324819	0.24099
Appbp2	-0.384142	-0.0629059	-0.614139	0.0237074	-0.0232386	1.07091
Appl1	-0.0349839	0	-0.0845923	0.311197	0.0104131	1.40981
Appl2	0.223797	-0.253514	-0.309438	0.806897	-0.280387	1.55134
Aprt	-0.551498	-0.746768	0.0165251	-0.859215	0	0.646667
Aptx	-0.610743	-0.0748125	-0.217992	0	0	0.421481
Aqp1	0	3.5821	0.318342	0	2.27649	-0.545974
Aqp10	0	-0.883422	0	0.104129	0	0.122555
Aqp11	0	0	0	0	0	0
Aqp2	0	0	0	0	0	0
Aqp3	0.326423	0.109487	-0.223458	2.15997	2.5187	0
Aqp4	0	0	0	0	0	0
Aqp5	0	0	0	0	0	0
Aqp6	0	0	0	0	0	0
Aqp7	0	0	0	0	0	0
Aqp8	0	0	0	0	0	0
Aqp9	-1.01851	0	0	0	0	0
Aqr	-0.411128	-0.477632	-0.224705	0	-0.597335	0.447379
Ar	0	-0.26609	-0.0777593	2.27808	0.343968	0
Araf	0	-0.310201	-0.0348127	0.069186	-0.288723	0.479799
Arap1	-0.728321	-0.23052	0.107352	-0.335144	-0.72699	-0.114063
Arap2	-0.0964909	0.0548111	-0.345502	0.835531	0.464808	2.32253
Arap3	-2.15223	-3.64704	-0.38267	-0.214118	-2.36632	0.954758
Arc	-0.75395	-1.92215	0	-1.50046	-0.459144	0
Arcn1	-0.224394	-0.141438	-0.0944593	-0.118149	-0.500964	1.34151
Areg	0	0	0	0	0	0
Arel1	-0.828881	-0.165129	-0.0757497	-0.420782	0	0
Arf1	-0.240612	0.61262	0.160122	-0.207281	0.119445	0.1594
Arf3	-0.383525	0	-0.042542	-0.105756	-0.420435	0.301908
Arf4	0.290296	0.592463	0.163009	0.14349	0	1.34066
Arf5	-0.0422697	0.762905	0.27747	0.0843066	0.29375	-0.00699112
Arf6	-0.408756	0.0716377	0.0217358	-0.353138	-0.0186544	1.24343
Arfgap1	-0.11365	-0.818642	-0.0337035	-0.207689	-0.299084	0.705379
Arfgap2	-0.105466	-0.332931	-0.131272	0	-0.193965	0.446197
Arfgap3	0.0742304	-0.207277	0	0	-0.247697	0.148954
Arfgef1	-0.749092	-0.21469	-0.375827	-0.0439605	-0.402712	0.814203
Arfgef2	-0.51799	-0.574278	-0.0960642	-0.281347	-0.420749	0.30754
Arfgef3	0	0	0	0	0	0
Arfip1	0	0.0472566	-0.20996	0	-0.672446	0.755032
Arfip2	0.766095	-0.0449743	-0.573223	1.27831	0.352023	0
Arfrp1	0	0.343347	-0.107738	0	0.0765084	0
Arg1	-2.524	0	0	-4.93519	-2.5417	-0.741911
Arg2	0	0	0	0	0	0
Arglu1	0	-0.50647	-0.851438	0.559111	-0.244936	1.89653
Arhgap1	-0.0136919	-0.174705	-0.0576386	-0.0763365	-0.512615	0.769557
Arhgap10	0.361904	0.580796	0.207019	0.17528	0.00622088	0
Arhgap11a	0	-0.861967	-0.627647	0.0103717	-1.00401	0.398017
Arhgap12	0.0501841	0.0255587	-0.115475	0.460941	0.530071	0.618907
Arhgap15	-0.258631	0	-0.296402	0	0.820298	0.140127
Arhgap17	-1.02666	-0.885644	0	-0.100035	-0.646931	0.611136
Arhgap18	0.744156	0.517963	-0.06665	0.746531	-0.205375	0
Arhgap19	0	-0.884838	0	0	-0.864186	0
Arhgap20	0	0	0	1.03432	0	0
Arhgap21	0.574636	0.146604	0	0	-0.183446	0.878609
Arhgap22	-0.0380926	-1.33587	0	0	-0.970391	0
Arhgap23	0	0.700657	0	0	0.805813	0
Arhgap24	0	-0.534629	0	1.83912	-0.665968	0
Arhgap25	-1.16818	-1.05256	-0.146869	-0.240364	-0.624489	0.580821
Arhgap26	-0.368377	-0.970407	-0.0323881	-0.611629	-0.75681	1.03058
Arhgap27	-1.44725	-1.94414	-0.393403	-0.340536	-1.43191	0.90338
Arhgap28	0	2.98971	0	0	1.3082	-0.612513
Arhgap29	0.296181	0.132559	-0.374207	0.24971	-0.610679	1.16903
Arhgap30	-1.54892	-1.22995	-0.336439	-0.710287	-0.303965	0.7964
Arhgap31	0	0	1.16374	0.0105465	0	0
Arhgap32	1.37747	0.320165	0.312562	0.637012	-0.64716	1.44295
Arhgap33	0	-2.20414	-0.199349	0.568292	-0.993864	0.181561
Arhgap35	0.845162	0.124672	0.0510497	1.39306	0.290512	0.467087
Arhgap36	0	0	0	0	0	0
Arhgap39	0	0	0	0.420012	0	0
Arhgap4	-0.663746	-1.43028	-0.405585	0.43164	-0.39549	0.973648
Arhgap40	0	0	0	0	0	0
Arhgap42	-0.601976	0	0	0	0	0.0554407
Arhgap44	0	0	0	0.59918	0	0
Arhgap45	-0.453475	-0.646411	-0.0724168	0.53999	-0.154141	0.357302
Arhgap5	0	0.543819	-0.74665	0.861063	0.916962	0.57291
Arhgap6	0.5484	1.99015	-0.184677	-0.242927	0.347899	-0.18701
Arhgap8	0	0	0	0.832542	0	0
Arhgap9	-0.498032	-0.699314	0	-0.0746269	-0.285912	0.757251
Arhgdia	-0.47559	-0.237162	0.192982	-0.335072	-0.375743	0.663579
Arhgdib	0	1.47223	0.207272	0.176445	0.91873	0.164889
Arhgdig	0	0	0	0	0	0
Arhgef1	-0.430424	-0.815278	0	0.409918	-0.0271097	0.723181
Arhgef10	1.47404	0.458684	0	0.706232	0	0.98739
Arhgef10l	-0.77609	0.591966	0.278511	-0.344206	-0.14407	-0.301508
Arhgef11	0	-0.235891	0	-0.0222442	0	0.835636
Arhgef12	1.65518	0.674096	0	1.08462	-0.224254	0.431293
Arhgef15	0	0.940575	0	0	0	0
Arhgef16	0	0	0	1.11072	0	0
Arhgef17	-1.15464	-0.773013	0	0	0	0.4584
Arhgef18	0	-0.322999	-0.0980122	0.557573	-0.0576792	0.889352
Arhgef19	-0.676891	-0.410495	0	-1.07205	-1.57206	0.696336
Arhgef2	-0.293037	-0.620508	-0.512333	-0.117057	-0.864695	0.75888
Arhgef25	0	0	0	0	0	0
Arhgef26	1.0642	0.438947	0.333251	0.198474	-0.14256	0.392128
Arhgef28	-0.0728546	-0.935885	-1.91655	0.630025	0	0.531012
Arhgef3	-0.763584	-0.711786	-1.31433	0.813979	0.527001	1.55124
Arhgef33	0	0	0	0	0.198815	0.659095
Arhgef37	0	0.229184	0	0.223209	0	-0.537377
Arhgef38	0	0	0	0	0	0
Arhgef39	0	-1.3662	-0.306086	0.486749	-1.09741	0.299625
Arhgef4	0.365868	0	0	0	0	0.406781
Arhgef40	0	-1.70944	0	0.0734912	0	-0.852347
Arhgef5	0.640999	0.846273	0.00466442	0.640802	0.1431	-0.429266
Arhgef6	-0.843596	-0.985479	-0.219222	0	-0.437017	0.87076
Arhgef7	-0.54104	-0.720113	-0.0142636	0	-0.326868	0.914743
Arhgef9	0	0	0	2.89771	0	0
Arid1a	-0.392385	-0.925337	-0.610259	0.428844	-0.375143	0.46175
Arid1b	0	-0.389335	0	0.772509	-0.232794	0.880841
Arid2	-0.0808517	0	-0.029005	0.0698656	0	0.69653
Arid3a	-0.255989	0	0.194506	-0.257454	-0.814001	1.08647
Arid3b	0	-0.377721	-0.176259	0.430581	-0.812524	0
Arid3c	0	0	0	0	0	0
Arid4a	-0.550043	-0.261651	-0.4473	0.145537	-0.230583	1.20255
Arid4b	-0.167645	-0.347535	-0.740149	0.719582	0	1.60334
Arid5a	0.553111	-0.320689	0.508273	0.959912	0.227723	2.33406
Arid5b	-0.550246	-0.622016	-0.330176	0.171042	-0.0299575	1.42598
Arih1	-0.0341606	-0.529586	-0.308061	0.320814	-0.947959	2.09935
Arih2	-0.0278095	-0.564495	-0.181098	0.306556	-0.471527	1.14631
Arl1	0.127823	0.261875	0	-0.203164	-0.216381	1.43866
Arl10	0	0	0	-0.006584	0	0.17355
Arl11	0.449231	0.493406	-0.221777	-0.305958	-0.24362	0.532854
Arl13a	0	0	0	0	0	0
Arl13b	-0.0655233	0	-0.450095	-0.000395153	-0.141883	0
Arl14	0	0	0	0.59918	0	0
Arl14epl	0	0	0	0	0	0
Arl15	0.190069	0.297716	-0.245186	0	0	0.564316
Arl16	-0.461114	-0.173351	-0.435835	0	0	0.616879
Arl2	-0.0467376	1.17081	0.0723267	0.290368	0.390733	-0.168456
Arl3	0	0	0	0	0.0297633	0.20836
Arl4a	-0.0763878	0.729175	0	-0.845804	-0.367761	0.851905
Arl4c	-0.37995	-0.224705	0.277355	0	0.809155	0.72279
Arl4d	0.408935	-0.60407	-0.251904	0.803687	-0.658725	0.930103
Arl5a	-0.221195	1.07089	-0.14515	-0.203745	-0.0701914	0.828312
Arl5b	-0.548657	0	-0.436497	1.32552	-0.545909	2.77101
Arl5c	0	0.505433	0	0	0	0
Arl6	0	0	0	0.271818	0	0
Arl6ip1	-0.0727994	-0.0929039	-0.101777	0	-0.284461	0.144116
Arl6ip4	-0.308371	-0.319863	0	-0.158958	-0.470193	0.546194
Arl6ip5	0.0535367	1.53271	-0.194519	0.993845	0.551911	-0.118536
Arl6ip6	-0.293525	0	-0.279824	0	-0.378417	0.186737
Arl8a	-0.0245396	0	0	-0.296498	-0.694873	0.849657
Arl8b	-0.296545	0.15725	0	-0.19081	-0.566311	1.06749
Arl9	0	0	0	0	-0.490197	0
Armc1	-0.170094	0	-0.391859	0	-0.236176	0.851695
Armc10	0	-0.0538187	-0.225322	-0.385524	0	0.0560442
Armc12	0	-0.198061	0	0.696287	-0.136628	0
Armc2	0.692809	1.86707	0.00307767	2.11222	0.842148	-0.0167404
Armc3	0	0	0	0	0	0.444483
Armc5	-0.710524	-0.390752	-0.01021	0.301153	0.0686573	0.334618
Armc6	-0.214236	-0.524509	0	0.0159637	-0.101577	0
Armc7	-0.993068	-0.194403	-0.0927248	0	0	0
Armc8	-1.1332	-0.270722	-0.376291	-0.376284	-0.3022	0.151948
Armc9	0.224886	-0.153554	-0.230595	0.490011	-0.673225	0.686448
Armcx1	-0.812873	-0.808985	-0.459764	0	-1.31043	2.43742
Armcx2	0	-0.287576	-0.0777593	0.608932	0	0.00518446
Armcx3	0.310208	0.702862	0	0.724195	0	0.226993
Armcx4	0.781304	-2.84452	0.639383	0	-1.64267	2.83376
Armcx5	0	-0.340122	-0.701785	1.33951	0	1.90705
Armh1	0	0	-0.127391	0	0	0
Armh2	0	0	0	0	0	0
Armh3	-0.204543	-0.235469	-0.347652	0	-0.143393	0.547237
Armh4	0	0	0	0	0	0
Armt1	0	-0.292412	0	0	-0.376786	1.26708
Arnt	0	-0.160604	-0.0564169	-0.397761	-0.701002	1.16224
Arnt2	0	0	0	0	0.936401	0.514872
Arntl	-1.51647	-0.716554	-0.320745	0	-0.0654965	0.80187
Arntl2	0	-0.260256	0	-1.97872	0	0
Arpc1a	0	0.143058	0	-0.0924832	-0.205312	0.335223
Arpc1b	-0.296243	0.0523008	0.243608	-0.245743	-0.221573	0.44858
Arpc2	-0.419552	0.441147	0.0221193	-0.0804968	-0.0114844	0.622283
Arpc3	-0.518923	0.351718	0	-0.581528	-0.331357	0.629886
Arpc4	-0.497878	0.077596	0	-0.159102	-0.129453	0.084302
Arpc5	-0.568819	0.369535	0	-0.49181	-0.429099	0.275456
Arpc5l	-0.240592	0	-0.357	0	-0.233432	0.379058
Arpin	1.0206	0	0	0	-0.177147	0.165066
Arpp19	-0.03012	0.638633	-0.259315	0.0745524	-0.131307	0.522385
Arpp21	0	0.191363	0	0	1.80525	1.30228
Arrb1	-0.360499	0.126987	0	-0.689286	-0.720348	0.356193
Arrb2	0.288828	0.363608	0	0.222428	0	0.124153
Arrdc1	-0.466154	-0.241093	-0.177005	-0.077421	-0.502661	0.27412
Arrdc2	0	-2.13079	0	0	0	0
Arrdc3	-0.953739	0	0	-0.220951	-0.849662	0.185062
Arrdc4	-0.53427	-0.217288	-0.0907348	0	1.12846	0.397759
Arrdc5	0	0	0	0	0	0
Arsa	0.0509166	-0.296801	0	0	-0.920435	0.319645
Arsb	-0.175143	-0.638872	0	0.036775	-1.02395	0.52804
Arsg	1.03994	0.21093	0	0.763767	0	0.222675
Arsh	0	0	0	0	0	0
Arsi	0	0	0	0	0	0
Arsj	0	0	0	0	0	0
Arsk	0.186262	0	-0.00240977	0.528051	-0.392075	0.541914
Arsl	0	0	0	0	0	0
Art1	0	0	0	-0.0898315	0.699451	0
Art3	-2.43158	0	0	-0.035484	0	0.165066
Art4	0	0.291016	0	0.0472295	3.1187	2.64591
Art5	0	0	0	0	0	0
Artn	0	0	0	0	0	0
Arv1	0	0	-0.115348	0	0	-0.205811
Arvcf	-3.20294	-4.48079	-0.267705	-1.66173	-3.69567	1.04125
Arx	0	0	0	0	0	0
As3mt	0	0	0	0	0	0
Asah1	-0.0839947	0.215478	-0.0559407	-0.358182	-0.778839	1.43463
Asah2	0	-0.520401	0.352756	0.500367	0	0.566293
Asap1	-0.566493	1.12155	0.179412	0.257643	0.177671	0
Asap2	-0.0932042	-0.135594	0	0	-0.622485	1.40598
Asap3	0	-0.420224	-0.421872	0	-1.53088	1.25683
Asb1	0	-0.224692	0.0499269	0.110768	-0.350475	2.11857
Asb10	0	0	0	0	0	0
Asb11	0	0	0	0	0	0
Asb12	0	0	0	0	0	0
Asb13	-0.40651	-0.251143	-0.0649835	-0.706745	-0.209794	0
Asb14	0	0	0	0	0	0
Asb15	0	0	0	0	0	0
Asb16	0	0	0	0	0	0
Asb17	0	0	0	0	0	0
Asb18	0	0	0	0	0	0
Asb2	-0.272283	-1.89723	-0.66071	0.537873	-0.839732	-2.33491
Asb3	0	0	-0.546855	0	0	0.309042
Asb4	0	0	0	0	0	0
Asb5	0	0.312166	0	0	0.633957	0
Asb6	-0.141571	-0.935942	-0.367683	-0.189676	-1.17187	0.774591
Asb7	-0.520316	0.151128	0	0	-0.460086	0.585668
Asb8	0	-0.517352	-0.480471	0	-0.84512	0.364405
Asb9	0	0	0	0	0	0
Ascc1	-0.426372	0	-0.0697527	0.202106	0	0.0718398
Ascc2	-0.0945512	-0.25097	-0.335087	-0.0950239	-0.313572	0.377743
Ascc3	-0.252193	0.0322086	-0.134292	0	-0.166108	0.375469
Ascl1	0	0	0	0	0	0
Ascl2	0	0	0	0	0	0
Ascl3	0	0	0	0	0	0
Ascl4	0	0	0	0	0	0
Ascl5	0	0	0	0	0	0
Asdurf	0	0	0	0	0	0
Asf1a	0	-0.338408	-0.178903	0.192531	-0.219519	0.364405
Asf1b	0.0213146	-2.05265	-0.0547392	0	-0.994586	0
Asgr1	0	0	0	0	0	0
Ash1l	-0.12983	-0.528365	-0.36362	0.135301	-0.574468	1.42131
Ash2l	0	-0.392286	-0.106385	-0.268843	-0.110751	0.586939
Asic1	0	0	0	1.22681	0	0
Asic2	0	0	0	0	0	0
Asic3	0	0	0	0	0	0
Asic4	0	0	0	0	0	0
Asic5	0	0	0	0	0	0
Asl	0.196462	-0.525596	0	0	-0.570927	0.895786
Asmt	0	0	0	0	0	0
Asns	-0.428072	0	0	0.284683	-0.240921	0
Asnsd1	-0.304316	0	-0.640689	0	-0.0271835	0
Aspa	0	0	0	0	0	0
Aspdh	0	-1.17831	-1.45247	1.62198	0	0.159686
Aspg	0.712659	-0.799612	-0.395179	-1.12743	-1.44479	0.615426
Asph	1.00207	0.396556	0	1.51008	-0.524287	0.88444
Asphd1	0	0	0	0	0	0
Asphd2	0	0	0	0	0	0
Aspm	-0.295878	-1.65893	-0.37325	0	-0.792042	-0.140344
Aspn	0.476527	0.247136	0	1.61625	0	0.0217037
Asprv1	0	0	0	0	0	0
Aspscr1	-0.313243	-0.614656	-0.144299	-0.259323	-0.49122	0.343766
Asrgl1	0	0	0	0	0	0
Ass1	1.11999	0.420612	-0.386744	1.336	-0.628161	0.470797
Aste1	-0.114679	-0.0169241	-0.770044	-0.149403	0	0
Astl	0	-1.32409	0	-0.129485	-0.809333	0
Astn1	0	0	0	0	0	0
Astn2	0	0	0	0	0	0
Asxl1	0	-0.674189	-0.23198	0.664124	-0.872955	1.39076
Asxl2	-0.4339	-0.495009	-0.56131	0.149205	0	1.14304
Asxl3	0	0	0	0	0	0
Asz1	0	0	0	0	0	0
Atad1	-0.776091	0	-0.310558	-0.401403	-0.206558	0.54876
Atad2	-0.224862	-1.2171	-1.19654	0.69871	-0.850218	1.15073
Atad2b	-0.595927	-0.532784	-0.378266	-0.487328	-0.590461	0.923657
Atad5	-0.483642	-0.838771	-1.73405	0	-0.432722	0
Atat1	-0.511238	-0.885147	0	0	-0.449697	0.111839
Atcay	0	0	0	1.5285	0	0
Ate1	-0.229437	-0.0722464	-0.231864	-0.379647	-0.368441	0
Atf1	-0.14614	0	-0.209129	-0.135127	-0.236079	1.07938
Atf2	-0.493744	0.0840743	-0.507163	0	0.0125353	0.789271
Atf3	-1.76238	-1.30495	-0.236044	-0.70047	-1.37964	0
Atf4	0.0495081	0.310421	0.196495	0.153718	0.216092	1.18318
Atf5	0	0.62761	0	0.366179	0	-0.0396351
Atf6	0	-0.0676062	0	-0.185907	-0.893962	0.857617
Atf6b	-0.177793	-0.716115	0	-0.0797213	-0.385932	0.213936
Atf7ip2	0	0	0	0	0	0
Atg10	0	0	-0.472427	0.188795	0	1.11557
Atg101	-0.0446997	-0.472569	-0.158296	0.145365	-0.742954	0.603783
Atg12	-0.165865	0.358904	-0.0585686	0.56158	0.227664	0.857137
Atg13	-0.0677517	0.252515	-0.248411	0.405742	0.183304	0
Atg14	0	-0.587226	-1.116	0	-0.262321	0.0346022
Atg16l1	-0.116666	-1.12613	-0.451865	-0.0454231	-0.557832	1.38508
Atg16l2	0	-2.20329	-0.835638	0.697461	-0.758987	0.324826
Atg2a	-0.160194	-1.32961	-0.160846	0.591829	-0.605541	1.9608
Atg2b	0	-0.444944	-0.045139	0.04716	-0.218136	0.974899
Atg3	-0.463141	0.735235	-0.195269	-0.502291	0	0.55135
Atg4a	-0.199822	0.24016	-0.0755415	-0.0459715	-0.211822	0.0543318
Atg4b	-0.0313198	-0.0821453	-0.274758	0.358391	-0.205317	0
Atg4c	0	0.269752	-0.4543	0.272733	-0.83362	1.18078
Atg4d	-0.312876	-0.119593	0	0	-0.637876	0.363385
Atg5	0	0.229907	-0.0688726	-0.00523181	-0.0214315	0
Atg7	-0.268296	-0.282593	0	-0.413781	-0.640339	0.288689
Atg9a	-0.956011	-0.913846	0	-0.496296	-0.796634	0.6485
Atg9b	0.0242856	-0.778285	0	0.160485	0.139771	1.12229
Atic	0.493021	-0.0687259	-0.267019	0.247942	-0.323508	0.78247
Atl1	0	0	0	0	0	0
Atl2	0.493446	-0.572182	-0.628903	0.927895	-0.78199	2.09282
Atl3	0	0.134858	-0.452994	-0.0412583	-0.344081	0.516991
Atm	0	0	-0.199011	0.530343	-0.10634	1.01308
Atmin	-0.128665	0	0	0	-0.211671	0.606815
Atn1	0	0.026363	0	0.806538	1.20575	0.70308
Atoh1	0	0	0	0	0	0
Atoh7	0	0	0	0	0	0
Atoh8	0	0.262397	0	0	0	0.514872
Atox1	0.225295	0.104235	0	-0.610844	0	0
Atp10a	0	-0.0789639	-0.39974	0	-0.260479	1.82017
Atp10b	0	0	0	0	0	0
Atp10d	-0.459472	-0.316346	0.0018918	-1.28799	-1.17576	1.24625
Atp11a	-0.0893971	-0.135684	0	-0.70823	-1.00849	1.05383
Atp11b	0	0.185345	0	0.164202	0.133629	1.17116
Atp11c	0	0.300443	0	0	-0.247449	1.76392
Atp12a	0	0	0	0	0	0
Atp13a1	-0.42244	-0.970378	0	-0.0849254	-0.832921	0.882966
Atp13a2	-0.739142	0.776887	0.713202	0.00475813	0.175028	-0.306381
Atp13a3	-0.340539	-0.0204808	-0.00735031	0.121268	-0.192555	1.91757
Atp13a4	0	0	0	0	0	0
Atp13a5	0	0	0	0	0	0
Atp1a1	-0.128248	-0.203712	-0.0202993	-0.37947	-0.666738	1.13303
Atp1a2	0	0	0	0	0	0
Atp1a3	-2.11621	0	0	0.121509	-0.293998	-0.771965
Atp1b1	0.788269	0.191832	-0.224498	0.777901	1.09084	0.795147
Atp1b2	0	0	0	0	0	0
Atp1b3	-0.788557	0.418399	0	-0.621694	-0.244201	0.453273
Atp1b4	0	0	0	0	0	0
Atp23	0	-0.147405	0	0	-0.0217098	0.22963
Atp2a1	0	-2.08766	0	0	0	0.340518
Atp2a2	0.0910275	-0.0789817	0	-0.273067	-0.817987	0.657015
Atp2a3	0.0950781	1.98268	0.435403	1.48273	0.801199	-0.276336
Atp2b1	-0.470219	-0.420685	0.0579024	-0.705339	-1.43935	2.38828
Atp2b2	0	0	0	0	0	1.67986
Atp2b3	0	0	0	0	0	0
Atp2b4	-1.13122	-1.28804	-0.350867	-0.678711	-1.42289	1.37065
Atp2c1	-0.14605	1.26457	0	-0.247705	0	0.247725
Atp2c2	0	0	0	0	0	0
Atp4a	0.555179	0	0	0.0774949	-0.159144	0
Atp4b	0	0	0	0	0	0
Atp5f1a	-0.12872	-0.193611	-0.0239465	0.0317328	-0.125525	0.779935
Atp5f1b	0.179939	-0.10887	-0.10834	0.078305	0	0.685928
Atp5f1c	-0.311757	-0.0590155	-0.355604	-0.0292295	-0.112824	0.727197
Atp5f1d	0	0.000180987	0.81065	0.31196	0	0
Atp5f1e	0.0537686	0.271075	0.0561166	0.0203162	0.200579	-0.0660175
Atp5if1	-0.0993293	1.06637	0	0	0.356323	-0.090301
Atp5mc1	0	-0.45705	-0.242111	0	-0.423375	0.260169
Atp5mc2	0.164021	-0.0406729	0	0.221243	0.318694	0.789005
Atp5mc3	0	-0.19023	-0.115395	0	-0.0125792	0.629978
Atp5me	-0.106341	-0.0727682	0	-0.50573	0	0.00538481
Atp5mf	-0.234869	0.741791	0	-0.107519	0.219751	0
Atp5mg	0.0583289	0.592133	-0.0758708	0.0399128	0.580803	-0.0497083
Atp5mj	0	0	-0.729087	-0.54735	0	0
Atp5mk	-0.215553	0.129089	-0.523488	-0.90935	0	0
Atp5pb	-0.113017	0	-0.334349	-0.00384303	-0.113213	0.643267
Atp5pd	-0.0111031	0.305417	-0.19771	-0.000622362	0.146478	0.339997
Atp5pf	0.0263509	0.270682	-0.263271	0	0.0659831	0.490427
Atp5po	0.011464	0.0641075	-0.237233	-0.210523	-0.141065	0.0894316
Atp6ap1	0	0	-0.0238527	0	-0.37457	0.523609
Atp6ap1l	0	0	0	0	0	0
Atp6ap2	-0.101013	0.303198	-0.0597177	-0.480436	-0.752414	0.983615
Atp6v0a1	-0.444032	0	0.022536	-0.818876	-0.645834	0.165874
Atp6v0a2	-0.759484	-0.713304	-0.579574	0.0644498	-0.209623	-0.203711
Atp6v0a4	0	0	0	0	0	0
Atp6v0b	-0.154746	-0.460953	-0.211167	-0.828225	-0.610781	0.874081
Atp6v0c	-0.143005	0.210607	0.477395	-0.276784	-0.152831	0.106238
Atp6v0d1	-0.162194	0	0	0	-0.0687886	0.45712
Atp6v0d2	0	-0.967288	0	0	0	0
Atp6v0e1	-0.334564	1.58777	-0.175153	0	0.562328	-0.0681754
Atp6v0e2	0	0	0	2.23027	0.0426912	0
Atp6v1a	-0.411361	0	0	-0.94041	-0.783587	0.498815
Atp6v1b1	0	0	0	0	0	0
Atp6v1b2	-0.806739	-0.0280024	0	-1.00755	-0.669574	0.580237
Atp6v1c1	-0.0498415	-0.155522	-0.305588	0	-0.26581	0.152187
Atp6v1c2	0	0	0	0	0	0
Atp6v1d	-0.175186	0	-0.113482	-0.0649186	0	0.879341
Atp6v1e1	-0.244297	-0.0286556	-0.0867943	-0.540609	-0.402077	0.38617
Atp6v1e2	0	0	0	0	0	0
Atp6v1f	-0.0807438	-0.0509779	0	-0.337646	-0.108948	0.521684
Atp6v1fnb	0	0	0	0.0774949	0	0
Atp6v1g1	-0.169009	0.329834	-0.0549618	-0.0158164	-0.114925	0.798606
Atp6v1g2	0.804993	2.78082	0.128283	1.13168	1.45609	-0.205347
Atp6v1g3	0	0	0	0	0	0
Atp6v1h	-0.381442	-0.197137	-0.322301	-0.548899	-0.654314	0.106128
Atp7a	-0.373873	-0.539458	-0.309434	-0.427386	-0.775019	1.28822
Atp7b	0	0	0	0	0	0
Atp8a1	-0.571029	0.117942	0	0.131064	0.316694	0.85333
Atp8a2	0	0	0	0	0	0
Atp8b1	0	0	-0.127391	0	0	0
Atp8b2	-0.435288	-0.792973	-0.402525	0.746483	0	0
Atp8b3	0	0	0	0	0	0
Atp8b4	0	-2.47153	-1.98313	0.736721	-1.09111	-0.929069
Atp9a	0.636601	-0.240693	0	1.71904	1.1909	-0.108436
Atp9b	0.0142644	-0.277863	0	0	-0.648014	0.735152
Atpaf1	-0.0444612	0.149915	0	0.182455	0	0.13493
Atpaf2	0	0.455813	0	0.466891	0.382777	0
Atpsckmt	0	-0.359106	0	0	-0.272481	0
Atr	0.0357157	-0.0776037	-0.2607	0.967986	0.0384039	0.65627
Atraid	0.340799	-0.365232	-0.105982	-0.620832	-0.165138	0.618899
Atrn	0	-0.407475	-0.168974	-0.143009	-0.753116	1.34471
Atrnl1	0.250791	0.213322	0.503769	-0.657955	-0.764594	1.72696
Atrx	-0.311809	-0.168066	-0.165053	0.108295	-0.346547	1.29018
Atxn1	0.340651	-1.74691	-0.215201	1.74949	-1.26889	0.0166655
Atxn10	0	0	0	0.481609	0.143155	0.490267
Atxn1l	0.13376	-0.222104	-0.0506917	0.233067	-0.5477	1.05839
Atxn2	-0.230216	-0.326555	0	0.131107	0	0.0885482
Atxn2l	-0.198393	-0.759392	0	0.210033	-0.219207	0.973883
Atxn3	-0.466542	0	-0.361897	0	-0.442824	1.43257
Atxn7	-0.564954	0	0	-0.283047	-0.16673	0.491612
Atxn7l1	-0.682922	0.876966	0	0.338154	0.674392	0.127115
Atxn7l2	-0.70243	-0.344451	0	0.39378	-0.213564	0.412816
Atxn7l3	-0.500666	0	0	0	0.122197	0.182596
Atxn7l3b	0	0.714466	0	0.418271	0.526127	0
Auh	0	-0.248518	-0.0715652	0	-0.201221	0.763215
Aup1	0	-0.604334	0	-0.0603481	-0.463782	0.665599
Aurka	-0.312063	-0.60244	-0.434626	-0.00578596	-1.2913	0
Aurkaip1	0	0	-0.224723	0.0235775	0.461566	0.453215
Aurkb	-0.0408073	-1.98648	-0.0567172	0	-1.57782	0.604681
Aurkc	0	0.0849611	0	0	0	0
Auts2	0	-1.92594	-0.864977	1.07731	-0.172925	-0.770066
Avil	-0.272966	1.84671	0.208477	1.92019	0.572583	0
Avl9	0	1.07631	0.0365981	0	0	0.829131
Avpi1	1.14001	0.354592	-0.0141409	0.499858	0.120989	2.24116
Avpr1a	0	0	0	0	0	0
Avpr1b	0	0	0	0	0	0
Avpr2	0	0	0	0	0	0.321488
Awat1	0	0	0	0	0	0
Awat2	0	0	0	0	0	0
Axdnd1	0	0	0	0	0	0
Axin1	0	-0.168449	-0.113587	0.320642	-0.00906561	0.400082
Axin2	0.306442	0	0	2.74849	0.260288	0.222091
Axl	-1.68859	-0.706882	0	-0.169955	-1.40188	1.5852
Azgp1	0	0.262397	0	0	0.936401	0
Azi2	-0.999202	0.375901	0	-0.616007	-0.111281	0.702784
Azin1	0.0993403	1.06439	0.20883	0.690787	0.207293	0
Azin2	0	0	0	0	0	0
B2m	-1.03308	0.526575	-0.351023	-1.10078	-0.944134	0.394149
B3galnt1	0	-1.92215	-0.0777593	0	0	0
B3galnt2	-0.910025	-0.000243542	0	0.0150967	-0.00824483	0.821222
B3galt1	0	0	0	0	0	0
B3galt2	0	0	0	0	0	0
B3galt4	-0.709854	-0.574129	0.566392	0	-0.539826	-0.241336
B3galt5	0	0	0	0	0	0
B3galt6	-0.0121501	0	0	0	0.00567389	0.466116
B3gat1	0	0	0	0	0	0
B3gat2	0	0	0	0	0	0
B3gat3	-0.314364	-0.285125	0	0	-0.146222	0.654324
B3glct	0.476832	0.747264	0	0	0	0.000430438
B3gnt2	0.469186	0.358445	-0.255399	-0.123791	-0.184557	1.44024
B3gnt3	0	0	0	0	-0.994421	0
B3gnt4	0	0	0	0	0	0
B3gnt5	0	0	0	0	0	0
B3gnt6	0	-0.325338	0	-1.1199	-2.25775	1.69241
B3gnt7	1.42505	0	0.372284	1.53981	-0.178541	0.808281
B3gnt8	0	-1.3651	0	0.278244	-1.14911	0
B3gnt9	0	0	0	0	0	0.436923
B3gntl1	0.325301	-0.108867	-0.232815	0	-0.375365	0.326368
B4galnt1	-0.673636	-2.3866	-0.586191	0.0816915	-0.268588	0
B4galnt2	0	0	0	0	0	0
B4galnt3	-0.733922	-0.7338	0	0	-0.738967	0
B4galnt4	0.453272	-0.43153	-0.0777593	2.03504	0.946918	0
B4galt1	0.00232687	-0.303542	0	0.940179	0.562535	0.654599
B4galt2	0.18127	0	0	0	0	0
B4galt3	0	-0.578872	-0.269532	0.804849	0	1.03063
B4galt4	0	0	-1.14446	0.461043	2.40971	0.108357
B4galt5	0.0503552	-0.16236	0.381444	-1.60483	-1.15678	1.64614
B4galt6	0.929039	0.67219	0.303337	0.868404	-1.24452	0.935976
B4galt7	0	-0.478581	-0.191104	0.183318	0	1.13531
B4gat1	0.281288	0	0	-3.11474	-0.449764	0.209392
B9d1	0	0	0	0	0	0
B9d2	-0.466533	0	0	0	-0.242617	0
Baalc	0	0	0	0	0	0
Babam1	-0.0683991	-0.646469	0	0.419188	-0.23145	1.02422
Babam2	0	0.570934	0.0158964	0.0532154	-0.0894823	0.403113
Bace1	0.497782	0.178451	0.0407235	0.719912	1.08819	0
Bace2	1.83909	0.28089	0	0.29081	0.320157	0.742203
Bach1	-0.719374	0.161589	0.0741101	-0.267415	-0.539204	0.849559
Bach2	0	0.0878222	-0.921102	2.37567	0.793888	1.08606
Bad	0	0.227996	0	0	0	0.067685
Bag1	-0.0401914	0.368853	0	-0.0709786	0	0.493131
Bag2	1.51172	1.04212	0	0.756741	-0.151975	1.71893
Bag3	0.193908	0.145942	0.0913985	1.19261	0.237954	0.911974
Bag4	0	0	-0.377741	0.306404	-0.0393397	0.500422
Bag5	0	-0.0655087	-0.271313	0.267494	0	0.999417
Bag6	-0.12587	0.279542	0.588317	0.269124	0.119772	0.0343229
Bahcc1	0	-1.25051	0	-0.43316	-0.289305	0.125744
Bahd1	0	-0.219452	0	0.553608	-0.163961	0.776233
Baiap2	0	-0.154197	0	-0.269228	-0.255969	0
Baiap2l1	0.382486	0.233781	-0.187577	0.478307	0	0.457673
Baiap2l2	0	0	0	0	0	0
Baiap3	0	-2.10861	0	1.13656	-0.829477	0
Bak1	-1.7569	-0.613449	0	-1.44419	-0.754127	-0.0225359
Bambi	0.543256	-0.954168	0	1.03102	1.40068	0
Banf1	-0.419929	-0.348458	-0.0613635	0	-0.0390645	0.205698
Banf2	0	0	0	0	0	0
Bank1	0.00371744	0.512237	0.290507	2.3662	-0.303666	0.508065
Bap1	-0.159039	-1.03194	-0.220805	0.332665	-0.7889	0.732583
Bard1	-0.00436077	-0.624392	-0.87892	-0.708229	-0.718204	0
Barhl1	0	0	0	0	0	0
Barhl2	0	0	0	0	0	0
Barx1	0	0	0	0	0	0
Barx2	0	0	0	0	0	0
Basp1	-0.411365	-0.64011	0	0.380707	-0.131216	0.53333
Batf	0	-0.0317422	0	0.0099848	0	0
Batf2	-1.6333	-0.132409	0	-0.529056	-1.50455	0.444483
Batf3	0	-0.312519	0	0.140834	0	0
Bax	-0.209185	-0.206781	0	0	0	0.514505
Baz1a	-0.919229	-0.737027	-0.288923	-0.640013	-1.03577	0.920955
Baz1b	-0.773781	-0.846014	-0.762679	0	-0.634232	0.339259
Baz2a	-0.465972	-0.833836	-0.288484	-0.0490167	-0.755756	1.14973
Baz2b	-0.264049	-0.421761	0	0	-0.933938	1.82353
Bbc3	-0.10316	-0.203261	0	0.716536	0.135309	0
Bbip1	-0.584698	0.967698	0	-0.800244	0	0.235837
Bbln	0	0.459921	0.0974935	0.123861	-0.267575	0.177213
Bbof1	0	0	-0.672166	0.61414	0.288	0.448542
Bbox1	0	0	0	0	0	0
Bbs1	0	0	-0.0821682	0.559173	0.122008	0
Bbs10	0	0	-0.552325	0.376403	-0.920108	0.115564
Bbs12	-0.0983817	-0.53427	-0.871524	0	0	0
Bbs2	0.285089	0	-0.104409	0	0	0.334618
Bbs4	-0.126564	-0.760302	-0.688204	0.374816	-0.341893	1.36085
Bbs5	0	0.481282	-0.734389	0	-0.132182	0
Bbs7	0	-0.0433961	-1.58305	0.889801	0	0.761915
Bbs9	0	0.444676	0	-0.290073	0	0
Bbx	-0.329936	1.10198	-0.00462541	0	0	0
Bcam	-2.34169	-1.49496	0	0.600532	-1.54842	1.65925
Bcan	0	0	0	0	0	0
Bcap29	0	0.129986	-0.418121	-0.131511	-0.144228	1.01412
Bcap31	-0.0789396	1.85083	0.00745005	0.373289	0.80653	0.0115343
Bcar1	0.107734	0	0	0.281358	-0.162209	0
Bcar3	0.321981	-0.30954	0	2.86564	0	0.300785
Bcas1	0	0	0	0	0	0
Bcas2	0	-0.202172	-0.440357	0.616068	0	1.32457
Bcas3	0	0.661132	-0.0158172	0.799067	0.106876	0
Bcat1	0	-1.06177	0	0	0	0
Bcat2	0	-0.188721	0	0	0.36285	0.561328
Bcdin3d	-0.295561	0	-0.611021	0	0.18843	0.395709
Bche	0	0	0	0	0	0
Bckdha	-0.00232459	-0.980693	0	-0.00663872	-0.44122	0.482009
Bckdhb	-0.171438	-0.101322	-1.25633	0.11033	0	0.753505
Bckdk	0	0	0	0	-0.132393	0.486337
Bcl10	-0.193306	0	0	0.0404894	-0.201438	0.942057
Bcl11a	-0.777053	-1.69221	0	0.6151	-1.08325	0.08128
Bcl11b	0.214903	0.140728	-1.11179	0.826179	1.41181	0
Bcl2	-0.905954	0.379281	-1.16821	1.28398	1.71868	1.44774
Bcl2a1	-0.710657	-0.574915	0	-0.383612	0	0
Bcl2l1	0	1.85351	0.0837013	0.299489	0.34304	-0.904546
Bcl2l10	0	0	0	0	0	0
Bcl2l11	0	-0.893122	0	0.432482	0	0
Bcl2l12	-0.150367	-0.753023	0	0	-0.303378	0
Bcl2l13	-0.488501	0.156484	0	-0.158502	-0.309562	0.136879
Bcl2l14	0	0	0	-0.308151	0	0
Bcl2l15	-1.50217	-0.797307	0	-1.10419	-1.22541	0.537592
Bcl3	-0.134433	-0.0168147	0.535032	-0.279771	-0.373507	1.98257
Bcl6	-1.79476	-1.91344	-0.608704	0	-1.10648	1.29616
Bcl6b	0	0.738794	0	0.59918	0	0
Bcl7a	0	-0.705625	0	1.86662	-0.114925	-0.311802
Bcl7b	0	0.329496	-0.0446449	0.0909192	0.118654	0
Bcl7c	0	0	0	-0.132969	-0.303732	0
Bcl9	0.789597	-0.225906	0	0.823422	0	1.06066
Bcl9l	0.0537538	-0.939231	0	0.970347	-0.319255	0.295379
Bclaf1	0.072957	0.0513417	-0.1822	0.34885	-0.0550861	1.94907
Bclaf3	-0.533705	-0.290604	-0.229348	0	0.0910754	0.0310807
Bco1	0	1.15302	-1.04087	0	0.0253859	0
Bco2	-0.510981	-1.21278	-0.712693	-0.042288	-1.54864	0.429444
Bcor	-0.275459	-0.292874	-0.126704	0.226884	-0.104469	0.147231
Bcorl1	-0.21109	0	0	0	0	0.131037
Bcr	0.599132	2.22337	0	0.791512	1.46404	-0.747486
Bdh1	-0.0997117	-0.420308	0	-0.271643	-0.238127	0.527147
Bdh2	0	0	0	0	0	0.177003
Bdkrb1	0	0	0	0	0	0
Bdkrb2	0	0	0	0	0	0
Bdnf	0	0	0	0	0	0
Bdp1	0	-0.191372	-0.401546	0.444511	-0.184547	0.886843
Bean1	0	0	0	0	0	0
Becn1	-0.155034	1.33038	-0.12942	0.468432	0.554347	-0.174876
Becn2	0	0	0	0	0	0
Begain	0	0	0	0	0	0
Bend3	0.297866	0.138361	0.0194763	0	0	0.882916
Bend4	0	0	0	1.85084	0	0
Bend6	0	0	0	0	-1.1408	0
Bend7	0	0	0	0	0	0
Best1	0	0	0	0	0	0
Best2	0	-0.38536	0	0	0	0
Best3	0	0	0	0	0	0
Best4	0	0	0	0	0	0
Bet1	-0.167237	0.258318	-0.808473	-0.324743	0	0
Bet1l	-0.443418	-0.190838	-0.388249	-0.0323073	0	0.346882
Bex1	0	0	0	0	0	0
Bex3	0	0	0	0.122236	0.797777	0
Bex4	0	0	0	0	0	0
Bfar	-0.806625	-0.205425	-0.659779	-0.31001	-0.0970131	-0.305894
Bfsp1	0	0	0	0	0	0
Bfsp2	0	0	0	0	0	0
Bgn	1.72638	0	0	0	0	0
Bhlha15	0	-0.149743	0	0	0	0
Bhlha9	0	0	0	0	0	0
Bhlhb9	0.0683042	0	0	0.677512	0	0.457795
Bhlhe22	0	0	0	0	0	0
Bhlhe23	0	0	0	0	0	0
Bhlhe40	1.00439	0.143195	-0.146955	0.229299	-0.421776	0.83322
Bhlhe41	0	-2.02483	-0.696061	2.75235	-1.35231	0.695665
Bhmt	0	3.03932	0	0	1.45047	-1.1514
Bicc1	0.468529	0.32771	0	1.1325	0	0
Bicd1	0	0.127336	0	0	0.250233	0
Bicd2	0.0131563	1.16664	0.0847567	0.750627	0.762424	0.138258
Bicdl1	0.0593177	-1.84688	-0.272544	1.5746	-0.118448	0
Bicdl2	0	0	0	0	0	0
Bicra	-0.0738958	-0.595408	-0.119039	0.731983	0	1.03406
Bicral	-0.319294	-0.287782	-0.0490779	0.0167487	-0.223463	0
Bid	0.0608717	0.809227	-0.150516	0.0542265	-0.0748527	0.0363374
Bik	0	0	0	0	0	0
Bin1	-0.696453	-0.100458	-0.151851	1.24814	0.496602	-0.393161
Bin3	-0.274451	0.0646517	0	0	-0.0684587	0
Birc2	-0.0609222	-0.0987031	-0.0943484	0.0997592	-0.157834	0.679501
Birc5	0	-1.54353	-0.456542	0.0893974	-0.859766	0
Birc6	-0.424683	-0.378894	-0.239357	0.280056	-0.447759	0.762002
Birc7	0	0	0	0	0	0
Bivm	0.0154107	0	-0.711448	-0.585694	-0.262318	0
Blk	-0.900014	-1.78192	0	2.87441	-2.11918	0.755183
Blm	0	-0.969782	-0.239497	-0.0863489	-0.452508	0.100081
Blmh	0	0	0	-0.0928642	-0.0724066	0.039582
Blnk	-1.41469	-0.9367	0	1.73634	-1.4397	0.149355
Bloc1s1	-0.233351	0.228373	0	-0.369831	0	0
Bloc1s2	-0.671439	-0.261697	-0.534822	0	-0.275999	1.34684
Bloc1s3	0	0	0	0	0	0.485125
Bloc1s4	0	0.264057	0	0	0.190732	1.83092
Bloc1s5	-0.231115	-0.482362	-0.209191	0.648787	0	0.135231
Bloc1s6	-0.266362	0	-0.246268	-0.0817064	-0.349524	0.911717
Blvra	0	0	-0.307166	-0.940103	-0.922095	1.31053
Blvrb	0	0.00783271	0.21	-0.433508	-0.629314	0.333868
Blzf1	0	0	-0.334254	0	-0.35325	1.08066
Bmerb1	0	2.75621	0	1.95535	0.720382	0.0143137
Bmf	-1.49595	-1.35845	-0.42135	-0.171288	-1.08379	0.273892
Bmi1	0	0.832036	-0.0748129	0.558265	0.22315	0.413693
Bmp1	1.19187	0.263477	0	1.42546	0	0.125654
Bmp10	0	0	0	0	0	0
Bmp15	0	0	0	0	0	0
Bmp2	0.371106	1.64948	0.493431	1.21284	0	0.770008
Bmp2k	-0.528939	-0.231023	-0.0341206	0	-0.682483	0.855196
Bmp3	0	0	0	0	0	0
Bmp4	0	-0.38536	0	0.405914	0	0
Bmp5	0	0	0	0	0	0
Bmp6	0	0.738794	0	0	0	0
Bmp7	0.414632	-0.158482	0	0.356145	0	0
Bmp8a	-2.75342	-3.04548	-0.246078	-1.25107	-3.4556	0.36942
Bmper	-2.66573	-2.61568	0	-0.868341	-2.23957	1.87385
Bmpr1a	0.0979693	0	0	1.46924	0	3.17199
Bmpr1b	-0.0811132	0	0	0	0	0
Bmpr2	-0.534362	0.173662	-0.117161	-0.697528	-0.57365	1.44698
Bms1	-0.380883	-0.249804	-0.349511	0	-0.274729	0.593766
Bmt2	-1.07298	1.03123	0	0	0.00478699	0.647357
Bmx	-0.326655	-0.663773	0	-0.970935	-1.60762	0.885712
Bnc1	0	1.13306	0	1.61625	0	0
Bnc2	0	0.497518	0	0	0	0
Bnip1	0	-0.249029	-0.423014	0	-0.427599	0.0766508
Bnip2	-0.201245	0.0576898	-0.112313	-0.434392	-0.767893	1.10654
Bnip3	0	0.503683	-0.163635	-0.628694	-0.157731	0.212408
Bnip3l	-0.206687	2.58229	0.0151672	0.850674	1.18656	-0.193921
Bnip5	-0.795146	0	0	-0.856455	-0.528837	0.0296945
Bnipl	0	0.329487	0	0.263009	1.967	1.21811
Boc	-0.219934	0	0	-2.09312	0	0.237112
Bod1	0	0	0	0.0217198	0	1.37638
Bod1l1	-0.196951	-0.431201	-0.262549	0	-0.373369	0.653126
Bok	0	0	0	0	0	0
Bola1	0	0	0	0	0	0.514872
Bola2b	-0.0937476	-0.0306517	0	0	-0.279245	0
Bola3	0	0	0	-0.0126145	0	0
Boll	0	0	0	0	0	0
Bop1	0	-0.390319	0	0	0	0.617441
Bora	0	-1.21165	-0.951861	0	-0.346284	0.08128
Borcs5	0	0	0	0	-0.451567	0.426274
Borcs6	-0.228071	-0.409364	0	0	-0.422328	0.629777
Borcs7	0	0.996209	0	0	0	0
Borcs8	-0.482387	0	-0.508393	0.163146	0.185348	0
Bpgm	-0.159118	3.12117	0	0	2.21577	-0.477602
Bphl	0.261199	0	-0.0292639	0	-0.143441	0.348954
Bpi	0	0	0	0	0	0
Bpifa1	0	0	0	0	0	0
Bpifa2	0	0	0	0	0	0
Bpifa3	0	0	0	0	0	0
Bpifb1	0	0	0	0	0	0
Bpifb2	0	0	0	0	0	0
Bpifb4	0	0	0	0	0	0
Bpifb6	0	0	0	0	0	0
Bpifc	0.376495	0	0	-0.368009	-0.566874	0
Bpnt1	-0.197659	0	-0.308088	0.200581	0	0.654574
Bpnt2	0	0.432057	-0.0602681	-0.00357744	-0.270923	1.40499
Bptf	-0.183889	-0.5039	-0.0539307	0.679472	-0.123941	0.672589
Braf	-0.0668198	-0.173498	-0.0786929	0.419478	-0.428206	0.993161
Brat1	-0.078911	-0.676085	-0.193681	0.725096	-0.0354697	-0.193957
Brca1	-0.107161	-2.01512	-0.866429	-0.119433	-1.32333	0
Brca2	0	-0.862257	-1.07098	0	-0.586342	0
Brcc3	0	0.24682	-0.530531	0.37799	0	0.089705
Brd1	-0.207867	-0.0649598	-0.0772827	0.11537	-0.114939	0.839503
Brd2	-0.116901	-0.364975	-0.16975	0.688395	0	0.470851
Brd3	0	-0.486039	-0.393057	0.450712	-0.304067	0.929609
Brd3os	0.376495	2.22398	0.00307767	1.55352	1.31206	-0.218279
Brd4	-0.331414	-0.833275	0	0.360677	-0.443097	1.22294
Brd7	-0.315708	-0.18136	-0.312044	0	0.00743065	1.05902
Brd8	-0.346298	-0.668922	-0.870002	0.239429	0.0451207	1.09365
Brd9	0	0	0	0.206933	-0.357129	0.598362
Brdt	-0.601912	-0.0462839	0	0	0	0
Brf1	0	-0.659565	-0.0189748	0.00988472	-0.378183	0.599381
Brf2	0	0	0	-0.202296	-0.310775	0.438256
Bri3	0.342664	0.0531275	-0.240736	-0.308541	-0.602192	0.520991
Bricd5	0	0	0	0.250592	-0.377566	0
Brinp1	0	0	0	0	0	0
Brinp2	0	0.505433	0	0	0	0
Brinp3	0	0	0	0	0	0
Brip1	0	-0.756302	-1.13857	0	-0.591352	0.776758
Brix1	0.0898603	-0.0705143	-0.284804	0	-0.217761	2.15465
Brk1	-0.438035	0.638122	-0.150453	-0.345979	0.0498113	0
Brme1	0	0	-1.01136	0	0	0
Brms1	-0.263014	0	0	-0.0104488	-0.363955	0.635426
Brms1l	0	0	-0.161106	0	-0.351739	0.52805
Brox	-0.392064	0.765112	-0.0882555	-0.0660173	0.150453	0.464095
Brpf1	-0.263478	-0.868432	-0.245304	0	-0.677891	0.997683
Brpf3	-0.165918	-0.288751	0	0.16887	-0.197766	0.464304
Brs3	0	0	0	0	0	0
Brsk1	0	-0.43235	-0.562534	0	0.531188	0.222091
Brsk2	0	0	0	0	0	0
Brwd1	-0.0913345	-0.495086	-0.415454	0.464426	-0.853174	1.83941
Brwd3	-0.364432	-0.269221	0	0	-0.757028	2.00916
Bscl2	0	0.487656	0	0	0	0
Bsdc1	-0.000631391	0.73719	0	0	0.445997	-0.123695
Bsg	0.441018	1.77934	0.320624	0.620457	0.975289	-0.0952651
Bsn	0	0	0	2.23518	0.692115	0
Bsnd	0	0	0	0	0	0
Bspry	0	0	0	0	0	0
Bst1	-1.40458	-2.13683	0.051017	-3.2141	-2.23975	1.04091
Bst2	-2.67335	-1.52831	-0.784688	-4.96481	-3.64188	0.0816905
Bsx	0	0	0	0	0	0
Btaf1	-0.107806	-0.545897	-0.112254	0	-0.841325	1.86897
Btbd1	-0.349782	0.0921158	-0.0169753	0.0413999	-0.346419	1.26813
Btbd10	0	-0.0188323	-0.170184	0.129909	-0.428759	0.942018
Btbd11	0	0	0	0	0	0
Btbd16	0	0	0	0	0	0
Btbd17	0	0	0	0	0	0
Btbd18	0	0	0	0	0	0
Btbd19	1.25399	-0.0289099	0.90126	0	0	1.81931
Btbd2	0	-0.390591	0	0.455107	0	0.0403971
Btbd3	0.655201	0.318382	0	0.275203	-0.197264	-0.158411
Btbd6	-0.136726	-0.202809	0	0	0	0.0528566
Btbd7	-0.511978	0.0214989	-0.012103	-0.00338134	-0.0542111	0.647324
Btbd8	-0.0262407	0	0	0	0	0.0219564
Btbd9	0	0	0	0.0880555	-0.337164	0.461995
Btc	0	0	0	0	0	0
Btd	0.253228	0	0	0.0470459	-0.0715237	0.392128
Btf3	0.0319874	0.0941471	-0.154203	0	0.256948	1.23007
Btf3l4	0	0.0482376	-0.418483	-0.0847713	-0.102363	1.09878
Btg1	0	0.394866	0.174798	0.355721	1.09235	1.38003
Btg2	0.468666	0.932058	0.821488	0.390123	0.11113	1.30383
Btg3	0.653929	0.162402	-0.0746299	0.455826	0	0.921842
Btg4	0	0	0	0	0	0
Btk	-0.370726	0	-0.0883552	-0.200292	-0.920209	0.474041
Btla	-1.08266	-0.812705	-1.15059	1.85645	0	0.383786
Btn1a1	0.18127	0	0	0	0	0
Btnl10	0	5.64219	0	0.798706	4.36792	-1.30947
Btnl2	-0.50144	0	-0.127391	-1.11647	-0.352901	0
Btnl9	-0.709522	-0.260256	0	2.88981	-1.1408	0
Btrc	0.519004	-0.12447	0	0.806354	-0.508967	0.939876
Bub1	0	-1.75491	-0.761706	0.0841391	-1.06296	0.14348
Bub1b	-1.0306	-1.38392	-0.258783	-0.804658	-1.33001	0.0576979
Bub3	-0.0245173	-0.270912	-0.532363	0	-0.414253	0.807223
Bud13	-0.168547	-0.663162	0	0	-0.233278	0.625119
Bud23	0	0	0	0	-0.306632	0.820689
Bud31	-0.145197	0	-0.196495	0	0	0.620369
Bves	0	0	0	0	0	0
Bysl	0	-0.680178	0	0	-0.393787	1.18923
Bzw1	-0.167702	0.300582	-0.219508	0.0204997	0.0194872	0.855589
Bzw2	0	-0.195822	-0.0229581	0	-0.271146	0.615453
C1d	-0.0160079	0.0820394	-0.50625	-0.70927	-0.440327	1.09456
C1galt1	0	1.14479	0	0	0	0.813916
C1galt1c1	-1.14731	-0.0281673	-0.329187	-0.841423	-0.666143	0.256865
C1qa	1.53836	0.513421	0.125926	1.235	-0.4645	0.959318
C1qb	1.57363	0.568141	0.115056	1.1374	-0.360613	0.95357
C1qc	1.59686	0.744616	0.486544	1.2984	-0.161144	1.00285
C1ql1	0	0	0	0	0	0
C1ql2	0	0	0	0	0	0
C1ql3	0	0.638307	0	0.452151	2.59813	1.32168
C1ql4	0	2.87185	0.468426	0.108319	1.22168	-0.460469
C1qtnf1	0	0	0	0.405914	0	0
C1qtnf12	0	0	0	0	0	0
C1qtnf2	0	0	0	0	0	0
C1qtnf3	0	0	0	0	0	0
C1qtnf4	0	0	0	0	0	0
C1qtnf5	0	0	0	0	0	0
C1qtnf6	0.999695	0.188375	0	0.691957	-0.439424	-1.14248
C1qtnf7	0	0	0	0	0	0
C1r	0.525924	1.97322	0	1.8469	0.551215	0.0451579
C1rl	0.47949	0	0	0	-0.905655	0.3152
C1s	1.55419	1.49875	0	1.83845	0.0858489	0.125654
C2	-2.63224	-2.38735	-0.518737	-3.75888	-4.04313	0.751651
C2cd2	1.00314	1.11132	-0.0661824	0.102741	-0.0316945	0
C2cd2l	0	-0.0199065	-0.0955071	-0.545963	-0.251537	0.560728
C2cd3	-0.721598	-0.511499	-0.0160322	-0.766084	0	0
C2cd4a	0	0	0	0	-0.994421	0
C2cd4c	0	0	0	0	0	0
C2cd4d	0	0	0	0	0	0
C2cd5	0	-0.389736	-0.292674	0.348023	-0.362794	0.837804
C2cd6	0	0	0	0	0	0
C3	1.33719	0.473268	0.387087	0.314142	-0.251327	1.45445
C3ar1	1.8631	0.947263	1.00847	0.435837	-0.445799	2.05142
C4a	0.542118	-0.320307	0.355778	-0.983921	-1.56196	0.758375
C4bpa	0	0	0	0	0	0
C4bpb	0	0.940575	0	1.03432	0	0
C5ar1	0.540734	0.400007	0.601079	-0.245588	-1.01023	1.91329
C5ar2	1.55422	0.240868	-0.00723721	0.406712	-0.988648	1.57182
C6	-1.78504	-1.83748	-1.79957	-2.39036	-4.78961	0
C7	-0.507741	0	0	-0.0898315	0	0
C8a	0	0.312166	0	0	0	0
C8b	0	0	0	0	0	0
C8g	0	0	0	0	0	0
C9	0	2.36762	0	0	0	0
C9orf72	-0.396248	0	-0.206281	-0.177089	-1.23046	1.55807
CUNH10orf105	0	1.3304	0	0	1.16032	0
CUNH10orf120	0	0	0	0	0	0
CUNH10orf143	0	-0.151673	0	0	-0.318663	0.823602
CUNH10orf53	0	0	0	0	0	0
CUNH10orf62	0	0	0	0	0	0
CUNH10orf67	0	0	0	0	0	0
CUNH10orf71	0	0	0	0	0	0
CUNH10orf82	0	0	0	0	0	0
CUNH10orf88	0	0	-0.160646	-0.353261	-0.386612	0.956526
CUNH10orf90	0	0	0	0	0	0
CUNH10orf95	0	0	0	0	0	0
CUNH10orf99	-1.52916	-2.20134	-1.30677	-0.440999	-1.34176	0
CUNH11orf1	0.153957	0	0	0.0696518	0	0.167587
CUNH11orf16	0	0	0	0	0	0
CUNH11orf24	-0.0568404	0.709119	0.175074	-0.29916	-0.0227772	0.84648
CUNH11orf42	0	0	0	0	0	0
CUNH11orf49	0.360872	1.83889	0	0.685691	0.702779	0
CUNH11orf52	0.376495	0	0	0	0	0
CUNH11orf53	0	0	0	0	0	0
CUNH11orf54	0.242843	0.34526	-0.023916	-0.756666	-0.191814	0.00796652
CUNH11orf58	0	-0.0386108	0	0.145858	0	0.815934
CUNH11orf65	0	0	0	0	0	0
CUNH11orf68	-0.859959	-0.153013	0.0286396	-0.47835	-0.126839	0.0650111
CUNH11orf71	0	0	0	-1.31016	0.0910264	0.238032
CUNH11orf80	0	-0.38536	0	0	0	0
CUNH11orf86	0	0	0	0	0	0
CUNH11orf87	0	0	0	0	0	0
CUNH11orf91	0	0	0	0	-0.140781	0.163451
CUNH11orf94	0.306442	-0.973139	0	0.728934	-1.2707	0
CUNH11orf96	0	0	0	0	0	0
CUNH11orf97	0	0	0	0	0	0
CUNH12orf29	0	0.682614	-0.517089	0.792109	0.11934	0
CUNH12orf4	-0.447011	-0.590226	-0.416683	-0.997831	-0.440797	0
CUNH12orf40	0	0	0	0	0	0
CUNH12orf42	0	0	0	0	0	0
CUNH12orf43	0	0	0	0	0.680111	0.0818975
CUNH12orf50	0	0	0	0	0	0
CUNH12orf54	0	0	0	0	0	0
CUNH12orf56	0	0	0	0	0	0
CUNH12orf57	-0.747327	0	0.385786	0	0	0.643755
CUNH12orf60	0	0.738794	0	0	0	0
CUNH12orf71	0	0	0	0	0	0
CUNH12orf73	-0.287695	0.0914596	0	0.820667	0	0.0686538
CUNH12orf75	1.14146	0.420303	-0.682971	0.331352	-0.331087	1.37888
CUNH12orf76	-1.32399	-0.318827	-0.402804	-0.170333	0.113902	0
CUNH13orf42	0	0	0	0	0	0
CUNH13orf46	0	0	0	0	0	0
CUNH14orf119	-0.451188	0	-1.15139	0	0	0
CUNH14orf132	0	0	0	0.250592	0.508854	0
CUNH14orf180	0	0	0	0	0	0
CUNH14orf28	0	2.25832	-0.109795	0	1.40682	-0.20502
CUNH14orf39	0	0	0	0	0	0
CUNH14orf93	-1.05647	-1.27246	-1.01414	-0.223411	0	0
CUNH15orf39	-0.0804508	-1.04329	0.526126	0	-0.435114	0.713418
CUNH15orf40	0.183794	0	0	0.0195037	0.559509	0.394829
CUNH15orf48	-0.468338	0.172209	-0.541621	-2.53914	-0.847256	0.935434
CUNH15orf61	0	0	0	0	0.0702989	0.193314
CUNH15orf62	0	0	0	0	0	0
CUNH15orf65	0	0	0	0	0	0.122555
CUNH16orf46	-0.402228	0	0	0	0	0
CUNH16orf54	-0.930684	-0.804738	-1.03466	-0.542728	-1.23409	0.0149984
CUNH16orf72	0	-0.0996035	-0.219031	0.112498	-0.186549	1.28032
CUNH16orf74	0	0.156845	0	0.847024	0.149183	0
CUNH16orf78	0	0	0	0	0	0
CUNH16orf86	0	0	0	0	0	0
CUNH16orf87	0	-0.078214	0	0.909031	-0.246236	1.57674
CUNH16orf89	0	0	0	0	0	0
CUNH16orf90	0	0	0	0	0	0.321488
CUNH16orf91	0.055404	0	0	0	0	0
CUNH16orf92	-0.197466	-0.791309	0	-0.00774329	-0.65285	0.1549
CUNH16orf95	0	0	0	0	0	0
CUNH16orf96	0	0	0	0	0	0
CUNH17orf100	0	0	0	0	0	0
CUNH17orf107	0	0	0	0	0	0
CUNH17orf49	0	0	0	0	0	0.185125
CUNH17orf50	0	0	0	0	0	0
CUNH17orf58	-0.769545	-0.127673	0	0.300596	0	0.557247
CUNH17orf64	0	0	0	0	0	0
CUNH17orf67	0	0	0	0	0	0
CUNH17orf75	0	0	0	0.113528	-0.00794465	0.0219332
CUNH17orf78	0	0	0	0	0	0
CUNH17orf80	0	0.0413807	-0.164554	-1.48281	0	0
CUNH17orf97	0	0	0	0	1.27603	0
CUNH17orf98	0	0	0	0	0	0
CUNH17orf99	0	0	0	0	0	0
CUNH18orf21	-0.0479263	0	-0.18341	0	-0.318646	0.150854
CUNH18orf25	-0.207892	0	-0.194009	0	-0.202861	1.66011
CUNH18orf32	-0.00649855	1.40368	-0.0330242	0.321359	0.763809	0
CUNH18orf54	-0.299078	-0.108012	-0.454923	0	0	0.407957
CUNH18orf63	0	0	0	0	0	0
CUNH19orf12	-1.50331	-0.833206	-0.375765	-2.21298	-1.96141	0.997419
CUNH19orf18	0	0	0	0	0	0
CUNH19orf25	-0.247275	-0.171314	0	0	0	0.464013
CUNH19orf33	0	0	0	0	0	0
CUNH19orf38	-1.17694	-1.0666	0.19992	-1.39804	-0.931833	1.20406
CUNH19orf44	0	-0.375721	-0.625073	-0.107798	-0.195658	0
CUNH19orf47	-0.180692	-0.427496	0	0	-0.175137	0.0603076
CUNH19orf53	0	0	0	0.33719	0.267356	0.370021
CUNH19orf54	-0.239568	-0.255614	-0.527163	0	-0.0877832	0.116697
CUNH19orf67	0	0	0	0	0	0
CUNH19orf71	0	0	0	0	0	0
CUNH19orf81	0	0	0	0	0	0
CUNH19orf84	-0.151716	-0.62627	-0.448873	0.414294	-0.985238	-0.491994
CUNH19orf85	0	0	0	2.83583	0	0
CUNH1orf100	0	0	0	0	0	0
CUNH1orf105	0	0	0	0	0	0
CUNH1orf109	0	0	-0.0440902	0.425751	0	0.320494
CUNH1orf112	0	-0.405549	-0.331898	0	-0.271226	0.901069
CUNH1orf115	0.692809	0.455801	0	0.549548	0.805813	0
CUNH1orf116	0	-0.687803	0	0	0	0.935344
CUNH1orf122	0	0	0	0	0	0.115628
CUNH1orf127	0	0	0	0	0	0
CUNH1orf131	-0.751523	-0.364751	-0.44877	-0.694286	-0.308786	0.100877
CUNH1orf141	-0.27438	0	0	0	0	0
CUNH1orf146	-0.27438	0	0	0	0	0
CUNH1orf158	0	0	0	0	0	0
CUNH1orf162	-1.37706	0.334705	0	-2.01958	-0.734047	0
CUNH1orf167	0	0	0	0	0	0
CUNH1orf174	0	0	-0.0576169	0.0555183	0	0
CUNH1orf185	0	0	0	0	0	0
CUNH1orf189	-0.783419	-0.183579	0	0	0	0
CUNH1orf194	0	0	0	0	0	0
CUNH1orf198	-0.175514	0	0	0	0.545034	0.079186
CUNH1orf21	0	-1.23185	-0.457417	0	0	0
CUNH1orf210	0	0	0	0	0	0
CUNH1orf216	0	0	0	-0.291612	-0.373216	0
CUNH1orf226	0	-0.22967	0	0.108319	-0.840887	0.115781
CUNH1orf232	0	0	0	0	0	0
CUNH1orf35	-0.0538517	-0.519989	-0.740074	1.03677	0	1.08933
CUNH1orf43	-0.603104	0	-0.138505	-0.329844	0	0
CUNH1orf50	-0.365879	0	-0.302207	-0.671706	0	0.029182
CUNH1orf52	0	0	0	0.272838	0	1.21984
CUNH1orf53	-0.560936	-0.418342	0	0	-0.465198	0.193227
CUNH1orf54	-0.607432	-1.02124	0	-1.37326	-0.549009	0
CUNH1orf56	0	0	0	0	0	0
CUNH1orf68	0	0	0	0	0	0
CUNH1orf74	0	0	-0.0368703	0.0681716	0.378655	0
CUNH1orf87	0	0	0	0	0	0
CUNH1orf94	0	0	0	0	0	0
CUNH20orf141	0	0	0	0	0	0
CUNH20orf144	0	0	0	0	0	0
CUNH20orf173	0	0	0	0	0	0.321488
CUNH20orf202	0	0	0	0.322932	-0.256835	0
CUNH20orf204	0	0	0	0.832542	0	0
CUNH20orf27	-0.540949	-0.580639	-0.310976	-1.45218	-1.29223	0.432821
CUNH20orf85	0	0.505433	0	0	0	0
CUNH20orf96	0	0	0	0	0	0
CUNH21orf58	0.765862	0	-1.80629	0	0	0
CUNH21orf62	0	0	0	0	0	0
CUNH21orf91	0	0.161014	0.216209	0.0700792	-0.86019	1.70362
CUNH22orf15	0	0	0	0	0	0
CUNH22orf23	0	0	0	0	0	0
CUNH22orf31	0	0	0	0	0	0
CUNH22orf39	-0.225815	-0.166189	0	0	-0.388461	0.0402857
CUNH2orf15	0	0	0	0	0.0606781	0.329006
CUNH2orf16	0	-0.336675	0	0.127851	0.288753	-0.220237
CUNH2orf42	-0.414961	-0.108738	0	-0.0719017	0	0
CUNH2orf49	0	-0.364519	-0.40023	0.294596	0	1.74406
CUNH2orf50	0	0	0	0	0	0
CUNH2orf66	0	0	0	0	0	0
CUNH2orf68	-0.350737	0.00665457	0	-0.145771	-0.551545	0.458009
CUNH2orf69	0.247222	0	-0.257145	0	-0.307316	0.674157
CUNH2orf72	0	1.5225	0	0	0.936401	-0.771965
CUNH2orf73	0	0	0	0	0	0
CUNH2orf74	0	0	0	0	0	0
CUNH2orf76	-0.313803	-0.119413	0	-3.03157	-0.129188	0.385589
CUNH2orf80	0	0	0	0	0	0
CUNH2orf81	0	0	0	0	0	0
CUNH2orf88	0	3.19225	0	0.941161	0.963789	-0.249713
CUNH2orf92	0	-1.08929	0	0.650598	0	0
CUNH3orf14	0	0	-0.477094	0.707116	0	0.265478
CUNH3orf18	-0.27438	-1.88192	0	0	0	0
CUNH3orf20	0.460275	0.0296787	0	0.0957256	0	0.672355
CUNH3orf22	0	0	0	0	0	0
CUNH3orf33	0	0	0	0.540282	0	0
CUNH3orf38	-0.414887	0.703875	-0.128482	0.0228858	0.56165	0.477145
CUNH3orf49	0	0	0	0	0	0
CUNH3orf52	0	3.71868	0	0.832542	0.640543	0
CUNH3orf62	-0.390761	-0.0996097	0	0	-0.113886	0.570014
CUNH3orf70	-0.71964	-0.119506	0	-0.828214	-1.08593	1.27272
CUNH3orf80	0	0	0	0	0	0
CUNH3orf84	0	0	0	0	0	0
CUNH3orf85	0	0	0	0	0	0
CUNH4orf17	0	0	0	0	0	0
CUNH4orf19	0	-0.687803	0	0	0	0
CUNH4orf3	0.111603	2.78398	-0.0158718	1.20169	1.60099	-0.0736111
CUNH4orf33	0.402888	0.320712	-0.906089	0	0	0.476559
CUNH4orf36	0	0.229184	0	0	0	0
CUNH4orf45	0	0	0	0	0	0
CUNH4orf46	-0.227684	-0.120188	-0.3807	-0.101769	-0.376311	1.55824
CUNH4orf47	0	0	0	0	0	0
CUNH4orf48	0	0	0	0	0	0
CUNH4orf50	0	-0.414579	0	1.06077	-0.579135	0
CUNH4orf51	0	0	0	0	0	0
CUNH4orf54	0	0	0	0	0	0
CUNH5orf15	-0.228181	0.354073	0	-0.84052	-0.443013	0.263841
CUNH5orf22	-0.104345	0	-0.722715	-0.209268	0	0.363561
CUNH5orf24	0	0.246699	-0.20636	0.334642	-0.358991	1.66066
CUNH5orf34	0	-0.949314	-0.692888	0.223582	0	0.14846
CUNH5orf46	0	0	0	0	0	0
CUNH5orf47	0	0	0	0	0	0
CUNH5orf49	0	0	0	0	0	0
CUNH5orf51	-0.637646	0.392264	-0.127058	-0.0158647	-0.282926	0.721823
CUNH5orf52	0	0.229184	0	0.695247	0	0
CUNH5orf58	0	0	0	0	0	0
CUNH5orf63	0.242358	0	-1.37715	0	-0.507185	0.444483
CUNH6orf118	0	0	0	0	0	0
CUNH6orf120	-0.109428	0	-0.128617	0	-0.195147	0.540956
CUNH6orf132	-0.960656	-0.0376655	-0.400199	-0.841088	-1.13643	0.369481
CUNH6orf136	0	-0.478089	-0.257415	0.046385	0	0
CUNH6orf141	-1.01197	0	0	0	0	0
CUNH6orf15	0	0	0	0	0	0
CUNH6orf163	0	0	0	0	0	0
CUNH6orf201	0	0	0	0	0	0
CUNH6orf226	0	2.41342	0.307839	0.306404	0.919677	-0.341839
CUNH6orf47	-0.431565	-0.530186	0	-0.285321	-0.533296	0.454102
CUNH6orf52	0	0	0.56162	0	0	0
CUNH6orf58	0	0	0	0	0	0
CUNH6orf62	-0.382596	1.02758	-0.027239	0	0.409611	0.218767
CUNH6orf89	-0.194418	0.728695	-0.0578588	-0.181257	0	0
CUNH7orf25	-0.255154	0	0	0.178709	0	0
CUNH7orf26	-0.323448	-0.498446	0	0	-0.32811	0.148118
CUNH7orf31	0	-0.266442	0	0	0	0.743636
CUNH7orf50	-0.935434	0	-0.0820257	-0.883979	-0.427345	0.25171
CUNH7orf57	0	0	0	0	-0.256835	0
CUNH7orf61	0	0	0	0	0	0
CUNH8orf33	-0.00201532	-0.118357	0	-0.433931	0	0.303924
CUNH8orf34	0	0	0	0	0	0
CUNH8orf37	0	0.567936	-1.01472	0.303703	-0.0998125	0
CUNH8orf48	0	0	0	0	0	0
CUNH8orf58	-0.237729	-0.763696	0	0	0	-0.199488
CUNH8orf74	0	0	0	0	0	0
CUNH8orf76	-0.401244	-0.206087	-0.707861	0	-0.0671584	0
CUNH8orf82	0	0	0	1.04664	0.444515	0.193596
CUNH8orf88	0	0	0	0	0	0
CUNH8orf89	0	0.505433	0	0	0	0
CUNH9orf116	0	0	0	0	0	0
CUNH9orf131	0	0	0	0	0	0
CUNH9orf135	0	0	0	0	0	0
CUNH9orf152	0	0	0	0	0	0
CUNH9orf153	0	0	0	0	0	0
CUNH9orf24	0	0	0	0	0	0
CUNH9orf40	0	0	0	0	-0.736695	0.726679
CUNH9orf43	0.271871	-0.116152	-0.368458	0	-0.614117	0.380713
CUNH9orf50	0	0	0	0	0	0
CUNH9orf57	0	0	0	0	0	0
CUNH9orf64	0.235119	0.0405532	-0.091784	0.310822	-0.239628	0.57007
CUNH9orf78	-0.156704	1.16861	0	-0.0456293	0.490462	0.104285
CUNH9orf85	-0.479027	0	0	-0.853839	0	0
CUNHXorf38	-0.225771	0	-0.291637	0	-0.00243528	1.27202
CUNHXorf65	-0.926491	-0.984332	-0.909251	1.60525	0	2.52768
CUNHXorf66	0	0	0	0	0	0
Ca1	0	3.46689	0	0	3.65752	-1.26417
Ca10	0	0	0	0	0	0
Ca11	0	0.60254	0	1.85084	1.45287	0.122555
Ca12	0	0	0	0.549548	0.419023	0
Ca13	-1.48814	-0.560821	0	-0.284217	-1.08859	0
Ca14	0	0	0	0	0	0
Ca2	-0.5219	1.10222	-0.0238571	0.760804	0.231655	-0.601382
Ca3	0	3.59102	0	0	0	-2.37427
Ca4	2.01291	0	-1.01881	1.05301	-0.627076	0.510231
Ca5a	0	0	0	0	0	0
Ca5b	-1.25768	-1.18471	0	-1.79881	-0.968764	0.536336
Ca6	0	0	0	0	0	0
Ca7	-0.000537334	0	0.0198881	-1.17235	0	0.999852
Ca8	0	0	-0.335656	0	-0.273987	0.186714
Ca9	0	0.940575	0	0	0	0
Caap1	-0.047424	0.123428	-0.1681	0.256629	-0.153548	0.471722
Cab39	-0.148327	0.430542	-0.117373	0.0943616	-0.384151	0.817204
Cab39l	0	0.350844	-0.142006	0	0	0.0676778
Cabcoco1	0	0	0	0	0.103542	0
Cabin1	-0.389474	-0.761646	-0.234198	0.0838716	-0.513509	0
Cables1	0.184139	-0.511433	0	0.61284	0	-0.924743
Cables2	0	-0.516563	-0.230873	0	-0.785244	0.716627
Cabp1	0	0	0	0	0	0
Cabp2	0	0	0	0	0	0
Cabp4	0	0	0	0	0	0
Cabp7	0	0	0	0	0	0
Cabs1	0	0	0	0	0	0
Cabyr	0	0	0	0	0	0.237112
Cacfd1	0.237217	0	0	0	0.110326	0.0589859
Cachd1	0.858726	0.0700247	-0.628028	1.0657	1.89953	2.93085
Cacna1a	-0.161414	-0.298816	-0.63643	0.607612	0	0.532331
Cacna1b	0	0	0	0	0	0
Cacna1c	1.94227	0.366905	0	0	0	0.808191
Cacna1d	0	0	0	0	-1.19773	0.222091
Cacna1e	0	0	0	0	0	0
Cacna1f	0.414632	0	0	0	0	0
Cacna1g	0	0	0	0	0	0
Cacna1h	0	0	0	0	0	0
Cacna1i	0	0	0	0	0	0
Cacna1s	0	0	0	0	0.633957	0
Cacna2d1	0	0.229184	0	0.405914	0	0
Cacna2d2	0	0	0	0	0.0913649	0.0576651
Cacna2d3	0	0	0	0.728934	2.05048	0.968598
Cacna2d4	0	0	0	0	0	0
Cacnb1	0	0	0	0	0	0
Cacnb2	0	0	0	0	0	0
Cacnb3	0	0.311846	0	0.00542822	0.263323	0
Cacnb4	0	0	0	0	0	0
Cacng1	0	0	0	0	0	0
Cacng2	0	0	0	0	0	0
Cacng3	0	0	0	0	0	0
Cacng4	0	0	0	0	0	0
Cacng5	0	0	0	0	0	0
Cacng6	0	-0.38536	0	0	0	0
Cacng7	0	0	0	0	0	0
Cacng8	0	0	0	0	0	0
Cactin	-0.267216	-0.175641	0	0	-0.374302	0.53238
Cacul1	-0.00180411	0.369031	-0.0365044	0	-0.262189	0.965956
Cad	0.0915484	-0.673438	0	0.742404	0	0.140127
Cadm1	0.0475388	0	0	0.254318	0	0.0442053
Cadm2	0	0	0	0	0	0
Cadm3	-0.79012	-3.2191	0	-2.85897	-2.62391	0.65442
Cadm4	0.632883	-0.883954	0	0	-0.703223	0
Cadps	0	0	0	0	0	0
Cadps2	0.642407	0	0	0	-0.174665	0.767704
Cage1	0	0	-0.562534	0	-0.235559	0.297233
Calb1	0	0	0	0.59918	0	0
Calb2	0	0	0	0	0	0
Calcoco1	0	0.253966	-0.00545761	0.180071	0.428232	0.0800772
Calcoco2	-0.214377	0.148951	-0.0991091	0	-0.198695	0.378341
Calcr	0	0	0	0	0	0
Calcrl	-0.727993	0.0793729	-0.347427	-1.0266	-0.137746	1.54301
Cald1	0.312027	3.03067	0.580477	1.21611	0.843607	-0.227056
Calhm1	0	0	0	0	0	0
Calhm2	-3.31688	-1.5967	0.071695	-0.565282	-1.43647	0.113536
Calhm3	-2.46767	-2.18687	0	0.284664	-2.5995	0
Calhm4	0	0	0	0	0	0
Calhm5	0	1.88891	0	0	0.277922	0
Calhm6	-3.9137	-1.47151	-0.976368	-2.61859	-1.02951	0
Calm1	-0.121264	0.292589	-0.203488	-0.190503	-0.763085	1.16148
Calm2	0	1.5991	-0.0648219	0.266748	0.557624	0.162223
Calm3	-0.31432	1.64622	0.00711243	0.0803045	0.911034	-0.191803
Calml4	0.46044	0.016216	0	0	-0.0836889	0.0294455
Calml6	0	0	0	0	0	0
Caln1	0	0	0	0	0	0
Calr	0.0489222	0	-0.196807	-0.236114	-0.400271	0.574523
Calr3	0	0	0	0.697516	0	0.353532
Calu	0.538549	0.41794	0.038044	-0.165014	-0.490132	0.915834
Camk1	0.254394	1.12793	0	0.196447	0	0
Camk1d	-0.23633	0.224094	-0.159148	-0.046274	-0.275977	0.238347
Camk1g	0	2.60371	0.0951582	0.679313	0.604041	-0.00284535
Camk2a	0	0	0	0	0	0
Camk2b	0	-1.23615	0	1.36396	-0.507171	0
Camk2d	-1.27982	-0.558927	0	-0.0221102	-0.965073	1.39804
Camk2g	0	-0.658354	0	0.406248	-0.0893219	0.122525
Camk2n1	0.966317	0.722308	0	1.23012	0.0610035	1.03137
Camk2n2	0	-0.461756	0	0	0	0
Camk4	0.316787	0.51386	-1.16695	1.27225	2.8557	1.51696
Camkk1	-0.0556257	-0.727126	-0.243987	0.0795032	-0.89195	0.973653
Camkk2	0	-0.315605	-0.270401	0	-0.549562	0.16021
Camkmt	0.424805	0	0	0	0.300263	0.159247
Camkv	0	0	0	0	0	0
Camlg	-0.0830841	0	0	0	-0.116367	0.050415
Camsap1	-0.0578007	-0.193881	-0.513593	-0.0132638	0	0
Camsap2	0.0738568	0.142994	-0.243287	-0.283429	-0.623476	1.47913
Camsap3	0	0	0	1.33677	0	0
Camta1	0	-0.131819	-0.685098	1.0014	0	0.0899455
Camta2	0	-0.424025	0	0.256418	-0.507334	0.442249
Cand1	0.0448596	-0.393944	-0.145608	0.287712	-0.506137	1.14204
Cand2	0	0	0	0	0	0
Cant1	-0.0716988	-0.392739	0	-0.226509	0	-0.147058
Canx	0	0.210877	-0.123977	-0.308915	-0.258679	0.857233
Cap1	-0.727067	0.989941	0.213273	-0.241926	0.196701	0.011647
Cap2	0	0	0	0	0	0
Capg	-1.10238	-1.28489	0.0710017	-0.521202	-0.859641	0.99253
Capn1	0	-0.646633	-0.370973	0.169127	-0.108062	0.564521
Capn10	-0.474419	-1.24256	-1.02423	-0.256459	-1.4862	1.12128
Capn11	0	0	0	0	0	0
Capn12	0	2.8553	0.150537	-0.291612	0	-0.201912
Capn13	0	0	0	0	0	0
Capn15	0	-1.08641	-0.51399	0	-0.341784	0.440201
Capn2	-0.551679	1.64339	0.0522058	-0.472527	0.143131	-0.291178
Capn3	0	1.27369	0	0	1.09592	0
Capn5	1.50721	0.559981	-0.175397	0	-0.0540307	0
Capn6	0	0	0	0	0	0
Capn7	0	0.278944	0	0.571433	-0.0373961	0.927698
Capn8	0	0	-0.360753	0	0	0
Capn9	0	0	0	0	0	0
Capns1	0.588146	1.54062	0.181512	0.791776	0.644546	-0.0231642
Capns2	0	-0.834186	0	0	-1.36839	0
Caprin1	-0.213631	-0.0614958	-0.293984	0	-0.29525	0.721666
Caprin2	-0.137774	-0.0601749	-0.8996	0.886384	0.52652	0.193035
Caps	0	0	0	0	0	0
Caps2	1.90602	0.750632	0	0.984365	0.0950992	1.16082
Capsl	0	0	0	0	0	1.67293
Capza1	-0.351256	0.111435	-0.188937	-0.24297	-0.54092	1.01237
Capza2	-0.399122	0.786616	-0.118602	-0.21595	-0.11348	0.99984
Capza3	0	0	0	0	0	0
Capzb	-0.47435	0.163889	0	-0.467091	-0.236216	0.245678
Card10	0.879679	-0.355083	0	0	-0.278833	0.00707766
Card11	-0.578357	-0.979314	-0.202125	1.62844	0.109476	0.48827
Card14	-2.64591	-1.88715	-0.0152952	-3.02727	-3.26428	0.209392
Card19	0	-0.0559216	0.242997	0	-0.370834	0
Card6	-0.140634	-0.510093	-0.408251	0.100724	-0.0560095	1.73599
Card9	-0.404168	-1.32288	0	-0.874377	-1.99882	1.47826
Carf	-0.454281	-0.155776	-0.814003	-0.0318886	0.0355178	0.720927
Carhsp1	0.304951	0.0598297	-0.395956	0.0474035	0.0178831	0.585607
Carm1	0.00406378	-0.233137	-0.0193077	0	-0.300422	1.22094
Carmil1	0	2.34156	0.114117	1.15309	0.693918	-0.0793625
Carmil2	-0.03781	-0.931385	-1.54258	0.998964	0.62942	0.999677
Carmil3	-0.684078	-2.99784	0	0.654767	-0.430199	1.5825
Carnmt1	0	0.435802	-0.290841	0.356788	0	0.480421
Carns1	0	-1.73772	-0.562534	1.30798	-0.828039	-0.667942
Cars1	-0.45876	-0.281584	-0.485558	-0.494445	-0.71149	0.529876
Cars2	0	-0.398389	0	0	0	0.474571
Cartpt	0	0	0	0	0	0
Casc3	-0.554601	-0.599771	-0.469841	-0.0985246	0	0.449515
Casd1	0	0.0583484	-0.26558	0.43596	0.461491	0.371829
Cask	-0.579633	-0.2826	0	-1.77156	-1.26631	0.945226
Caskin1	-0.687266	-2.18687	0	0	-2.25487	1.95286
Caskin2	0	-0.880461	0	0.460422	0	0
Casp14	0	0	0	0	0	0
Casp2	-0.434348	-0.546828	-0.540659	0.146279	0	0
Casp3	-0.681859	1.51064	-0.167717	-0.332742	0.201445	-0.29788
Casp6	0	0.392483	0	-0.0392748	0	-0.209398
Casp7	-1.2395	-0.394111	0	-1.19306	-0.842599	0.685748
Casp8	0	0	-0.196539	0.286267	-0.397093	1.17656
Casp8ap2	-0.362245	-0.674741	-0.708896	0.773426	-0.55926	1.28248
Casp9	-0.688314	-0.890169	-0.189203	-0.586564	-1.0258	0.715486
Casq1	0	0	0	0	0	0
Casq2	0	0.229184	0	0	0	0
Casr	0	0	0	0	0	0
Cass4	-0.995487	1.07922	0	0	0.82803	-0.510865
Cast	0.184577	0.199713	0	-0.964419	-0.658962	1.58858
Castor1	1.29496	-0.895505	0	0	-0.972134	1.44388
Castor2	0.366973	0	-0.618093	1.21284	1.10024	0
Casz1	0	-2.01454	0	0.962019	-0.359397	0.734534
Cat	-0.0373819	1.31072	0.103002	0	0.226224	-0.0846648
Catsper1	0	0	0	0	0	0
Catsper2	0	0	0	0	0	0.0296945
Catsper3	0	0	0	0	0	0
Catsper4	0	-0.834186	0	0.00542822	0	0.163451
Catsperd	0	0	0	0	0	0
[truncated: 30,304 more rows]
